# Supplementary material
Source: PubMed Central journal article supplement (PMC3369503)

## Concise Total Synthesis and Stereochemical Revision of (+)-Naseseazines A and B. Regioselective Arylative Dimerization of Diketopiperazine Alkaloids.

Justin Kim and Mohammad Movassaghi\*

Massachusetts Institute of Technology, Department of Chemistry  
Cambridge, Massachusetts 02139

### Supporting Information

|                                                                                                                                                      |     |
|------------------------------------------------------------------------------------------------------------------------------------------------------|-----|
| General Procedures                                                                                                                                   | S2  |
| Materials                                                                                                                                            | S2  |
| Instrumentation                                                                                                                                      | S2  |
| Positional Numbering System                                                                                                                          | S3  |
| Biogenetic Hypothesis (Scheme S1)                                                                                                                    | S3  |
| Benzyl 6-bromo-3-formyl-1 <i>H</i> -indole-1-carboxylate ( <b>S1</b> )                                                                               | S4  |
| ( <i>Z</i> )-Benzyl 6-bromo-3-(2-(( <i>tert</i> -butoxycarbonyl)amino)-3-methoxy-3-oxoprop-1-en-1-yl)-1 <i>H</i> -indole-1-carboxylate ( <b>29</b> ) | S5  |
| <i>N</i> <sup>α</sup> -Boc- <i>N</i> <sup>in</sup> -Cbz-6-bromotryptophan methyl ester (+)- <b>30</b>                                                | S6  |
| Bromoindole diketopiperazine (–)- <b>31</b>                                                                                                          | S7  |
| Pinacol boronic ester (–)- <b>32</b>                                                                                                                 | S9  |
| Potassium trifluoroborateindole (–)- <b>33</b>                                                                                                       | S10 |
| Alanine diketopiperazine (–)- <b>9</b>                                                                                                               | S11 |
| Tetracyclic bromide A (+)- <b>11</b>                                                                                                                 | S13 |
| (–)- <i>N</i> <sup>in</sup> <i>N</i> <sup>ini</sup> -Dicarboxybenzyl Naseseazine A ( <b>15</b> )                                                     | S14 |
| (+)-Naseseazine A ( <b>1</b> )                                                                                                                       | S16 |
| Proline diketopiperazine (–)- <b>10</b>                                                                                                              | S18 |
| Tetracyclic bromide B (+)- <b>12</b>                                                                                                                 | S20 |
| (–)- <i>N</i> <sup>in</sup> <i>N</i> <sup>ini</sup> -Dicarboxybenzyl Naseseazine B ( <b>16</b> )                                                     | S21 |
| (+)-Naseseazine B ( <b>2</b> )                                                                                                                       | S23 |
| (–)- <i>N</i> <sup>in</sup> <i>N</i> <sup>ini</sup> -Dicarboxybenzyl <i>iso</i> -Naseseazine A ( <b>13</b> )                                         | S25 |
| (+)- <i>iso</i> -Naseseazine A ( <b>17</b> )                                                                                                         | S27 |
| (–)- <i>N</i> <sup>in</sup> <i>N</i> <sup>ini</sup> -Dicarboxybenzyl <i>iso</i> -Naseseazine B ( <b>14</b> )                                         | S29 |
| (+)- <i>iso</i> -Naseseazine B ( <b>18</b> )                                                                                                         | S31 |
| 3-(2-Thienyl)tetracycle (–)- <b>19</b>                                                                                                               | S33 |
| 3-(3-Thienyl)tetracycle (–)- <b>20</b>                                                                                                               | S34 |
| 3-Allyltetracycle (–)- <b>21</b>                                                                                                                     | S36 |
| 3-Acetyltetracycle (–)- <b>22</b>                                                                                                                    | S38 |
| 3-(Methyl- $\alpha,\alpha$ -dimethylacetate)tetracycle (–)- <b>23</b>                                                                                | S39 |
| 3-(4-Tolyl)tetracycle (–)- <b>24</b>                                                                                                                 | S40 |
| 3-(2-Tolyl)tetracycle (–)- <b>25</b>                                                                                                                 | S41 |
| 3-(4-Methoxyphenyl)tetracycle (–)- <b>S2</b>                                                                                                         | S43 |
| 3-(2-Methoxyphenyl)tetracycle (–)- <b>26</b>                                                                                                         | S44 |
| 3-( <i>trans</i> -Styryl)tetracycle (–)- <b>27</b>                                                                                                   | S45 |
| NMR Comparison Tables for (+)-Naseseazine A ( <b>1</b> )                                                                                             | S46 |
| NMR Comparison Tables for (+)-Naseseazine B ( <b>2</b> )                                                                                             | S49 |
| Marfey's Analysis of (+)-Naseseazine B ( <b>2</b> )                                                                                                  | S52 |
| Copies of UV-vis, <sup>1</sup> H, <sup>13</sup> C, and <sup>19</sup> F NMR Spectra                                                                   | S54 |

**General Procedures.** All reactions were performed in oven-dried or flame-dried round-bottom flasks. The flasks were fitted with rubber septa and reactions were conducted under a positive pressure of argon. Gas-tight syringes with stainless steel needles or cannulae were used to transfer air- and moisture-sensitive liquids. Where necessary (so noted), reactions were performed in Schlenk tubes fitted with a PTFE stopcock. Flash column chromatography was performed as described by Still et al. using granular silica gel (60 Å pore size, 40–63 μm, 4–6% H<sub>2</sub>O content, Zeochem).<sup>1</sup> Analytical thin layer chromatography (TLC) was performed using glass plates pre-coated with 0.25 mm 230–400 mesh silica gel impregnated with a fluorescent indicator (254 nm). TLC plates were visualized by exposure to short wave ultraviolet light (254 nm) and an aqueous solution of ceric ammonium molybdate (CAM) followed by heating on a hot plate (~250 °C). Organic solutions were concentrated at 29–30 °C on rotary evaporators capable of achieving a minimum pressure of ~2 torr.

**Materials.** Commercial reagents and solvents were used as received with the following exceptions: dichloromethane, acetonitrile, tetrahydrofuran, methanol, pyridine, toluene, and triethylamine were purchased from J.T. Baker (Cycletainer™) and were purified by the method of Grubbs et al. under positive argon pressure.<sup>2</sup> Nitroethane was distilled over calcium hydride and stored over 4 Å molecular sieves. 1-Ethyl-3-(3-dimethylaminopropyl) carbodiimide hydrochloride was purchased from Oakwood Products, Inc.; *N*-hydroxybenzotriazole was purchased from Aroz Technologies, LLC; 6-bromo-3-formylindole was purchased from Frontier Scientific, Inc.; (+)-1,2-bis((2*S*,5*S*)-2,5-diethylphospholano)benzene(1,5-cyclooctadiene)rhodium(I) trifluoromethanesulfonate was purchased from Strem Chemicals, Inc.; and (±)-Boc-α-phosphonoglycine trimethyl ester as well as all amino acid derivatives were purchased from Chem-Impex International, Inc. All other solvents and chemicals were purchased from Sigma–Aldrich.

**Instrumentation.** Proton nuclear magnetic resonance (<sup>1</sup>H NMR) spectra were recorded with Varian inverse probe INOVA-500 and Varian INOVA-500 spectrometers, are reported in parts per million on the δ scale, and are referenced from the residual protium in the NMR solvent (CDCl<sub>3</sub>; δ 7.24 (CHCl<sub>3</sub>), DMSO-*d*<sub>6</sub>; δ 2.50 (DMSO-*d*<sub>5</sub>)). Data are reported as follows: chemical shift [multiplicity (s = singlet, d = doublet, t = triplet, m = multiplet), coupling constant(s) in Hertz, integration, assignment]. Carbon-13 nuclear magnetic resonance (<sup>13</sup>C NMR) spectra were recorded with a Varian INOVA-500 spectrometer, are reported in parts per million on the δ scale, and are referenced from the carbon resonances of the solvent (CDCl<sub>3</sub>; δ 77.23, DMSO-*d*<sub>6</sub>; δ 39.51). Data are reported as follows: chemical shift (assignment). Fluorine-19 nuclear magnetic resonance (<sup>19</sup>F NMR) spectra were recorded with a Varian Mercury 300 spectrometer, are reported in parts per million on the δ scale, and are referenced from the fluorine resonance of neat trichlorofluoromethane (CFCl<sub>3</sub>; δ 0). Data are reported as follows: chemical shift (assignment). Infrared data (IR) were obtained with a Perkin-Elmer 2000 FTIR, and are reported as follows: frequency of absorption (cm<sup>-1</sup>), intensity of absorption (s = strong, m = medium, w = weak, br = broad). Optical rotations were measured on a Jasco-1010 polarimeter. UV-Vis spectrophotometric data were acquired on a Varian Cary 50 Bio UV-Vis spectrophotometer. Preparative HPLC was performed on a Waters system with the 1525 Binary HPLC Pump, 2489 UV/Vis Dctcor, 3100 Mass Detector, System Fluidics Organizer, and 2767 Sample Manager components. We are grateful to Dr. Li Li for obtaining the mass spectrometric data at the Department of Chemistry's Instrumentation Facility, Massachusetts Institute of Technology. High resolution mass spectra (HRMS) were recorded on a Bruker Daltonics APEXIV 4.7 Tesla FT-ICR-MS using either an electrospray (ESI) or direct analysis in real time (DART) ionization source.

<sup>1</sup> Still, W. C.; Kahn, M.; Mitra, A. *J. Org. Chem.* **1978**, *43*, 2923.

<sup>2</sup> Pangborn, A. B.; Giardello, M. A.; Grubbs, R. H.; Rosen, R. K.; Timmers, F. J. *Organometallics* **1996**, *15*, 1518.

**Positional Numbering System.** At least three numbering schemes for diketopiperazine alkaloids exist in the literature.<sup>3</sup> In assigning the <sup>1</sup>H and <sup>13</sup>C NMR data of all intermediates en route to our total syntheses of (+)-naseesezines A and B, we wished to employ a uniform numbering scheme. For ease of direct comparison, particularly between early intermediates and advanced compounds, the numbering scheme used by Barrow for (+)-WIN-64821 (using positional numbers 1–19) was optimal and is used in this document. This numbering system is also consistent with that employed in the isolation paper of (+)-naseesezines A and B.<sup>4</sup> In key instances, the products are accompanied by the numbering system as shown below.

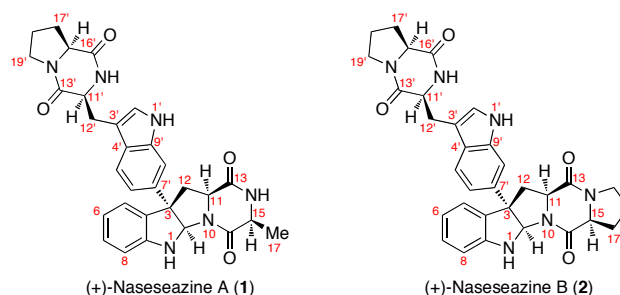

**Biogenetic Hypothesis.** We consider a biosynthetic hypothesis in which dimerization occurs at an advanced stage using well-elaborated tryptophan systems, such as cyclodipeptides, to be plausible.<sup>5</sup> Furthermore, a likely dimerization scheme would invoke a cationic mechanism (radical or non-radical) in contrast to that which is suggested in the isolation report.<sup>4</sup> Two contiguous or non-contiguous single-electron oxidation events of an indole core accompanied by a Friedel–Crafts addition of another tryptophan indole could give rise to a number of dimer cognates whose regioisomeric constitution would be controlled by the structure of an enzyme-binding pocket.

**Scheme S1.** Our hypothesis for a plausible biogenesis of naseesezines from advanced cyclodipeptides.

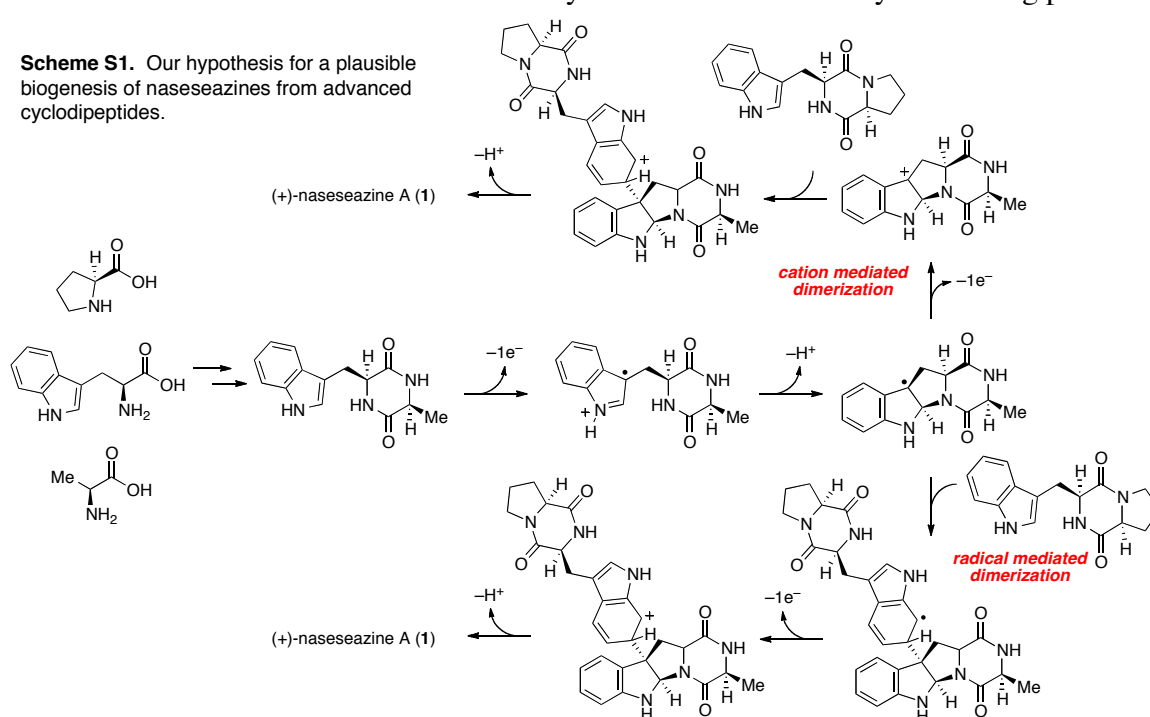

<sup>3</sup> (a) Von Hauser, D.; Weber, H. P.; Sigg, H. P. *Helv. Chim. Acta* **1970**, *53*, 1061. (b) Barrow, C. J.; Cai, P.; Snyder, J. K.; Sedlock, D. M.; Sun, H. H.; Cooper, R. *J. Org. Chem.* **1993**, *58*, 6016. (c) Springer, J. P.; Büchi, G.; Kobbe, B.; Demain, A. L.; Clardy, J. *Tetrahedron Lett.* **1977**, *28*, 2403.

<sup>4</sup> Raju, R.; Piggott, A. M.; Conte, M.; Aalbersberg, W. G. L.; Feussner, K.; Capon, R. *J. Org. Lett.* **2009**, *11*, 3862.

<sup>5</sup> For hypotheses on dimeric cyclotryptamine biosynthesis, see: (a) Woodward, R. B.; Yang, N. C.; Katz, T. J.; Clark, V. M.; Harley-Mason, J.; Ingleby, R. F. J.; Sheppard, N. *Proc. Chem. Soc.* **1960**, 76, and (b) Robinson, R.; Teuber, H. *J. Chem. Ind.* **1954**, 783. For labeling and biosynthetic studies, see: (c) Kirby, G. W.; Shah, S. W.; Herbert, E. J. *J. Chem. Soc. C* **1969**, 1916, (d) O'Donovan, D. G.; Keogh, M. F. *J. Chem. Soc. C* **1966**, 1570, and (e) Schutte, H. R.; Maier, B. *Arch. Pharm.* **1965**, *298*, 459. For reviews, see: (f) Kim, J.; Movassaghi, M. *Chem. Soc. Rev.* **2009**, *38*, 3035, (g) Schmidt, M. A.; Movassaghi, M. *Synlett* **2008**, 313, and (h) Steven, A.; Overman, L. E. *Angew. Chem. Int. Ed.* **2007**, *46*, 5488.

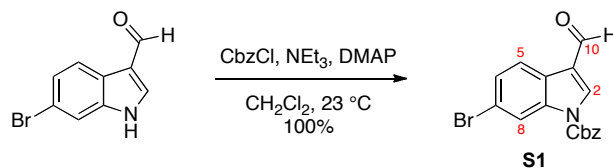

**Benzyl 6-bromo-3-formyl-1*H*-indole-1-carboxylate (S1):**

Triethylamine (1.98 mL, 14.2 mmol, 1.50 equiv) was added via syringe to a solution of 6-bromo-3-formylindole (2.13 g, 9.49 mmol, 1 equiv) and 4-dimethylaminopyridine (116 mg, 949  $\mu$ mol, 0.100 equiv) in dichloromethane (25 mL) at 23 °C. Benzyl chloroformate (1.74 mL, 12.3 mmol, 1.30 equiv) was added dropwise to the solution via syringe. After 1 h, another portion of benzyl chloroformate (267  $\mu$ L, 1.90 mmol, 0.20 equiv) was added via syringe. After 40 min, the reaction mixture was diluted with dichloromethane (100 mL) and washed with saturated aqueous sodium bicarbonate solution (100 mL). The aqueous layer was further extracted with dichloromethane (2  $\times$  25 mL). The combined organic layers were washed with aqueous hydrogen chloride (1 N, 100 mL) and the resulting aqueous layer was extracted with dichloromethane (2  $\times$  25 mL). The combined organic layers were dried over anhydrous sodium sulfate, were filtered, and were concentrated under reduced pressure. Benzyl 6-bromo-3-formyl-1*H*-indole-1-carboxylate (**S1**) (3.40 g, 100%) was obtained as a white solid. Structural assignments were made using additional information from gCOSY, HSQC, and HMBC experiments.

$^1\text{H}$  NMR (500 MHz,  $\text{CDCl}_3$ , 20 °C):

$\delta$  10.01 (s, 1H,  $\text{C}_{10}\text{H}$ ), 8.35 (s, 1H,  $\text{C}_8\text{H}$ ), 8.17 (s, 1H,  $\text{C}_2\text{H}$ ), 8.09 (d,  $J = 8.4$ , 1H,  $\text{C}_5\text{H}$ ), 7.50–7.38 (m, 5H,  $\text{Ph}_{\text{Cbz}}\text{-H}$ ), 7.38–7.50 (m, 1H,  $\text{C}_6\text{H}$ ), 5.48 (s, 2H,  $\text{Ph}_{\text{Cbz}}\text{CH}_2$ ).

$^{13}\text{C}$  NMR (125.8 MHz,  $\text{CDCl}_3$ , 20 °C):

$\delta$  185.6 ( $\text{C}_{10}$ ), 149.9 ( $\text{C}=\text{O}_{\text{Cbz}}$ ), 136.7 ( $\text{C}_9$ ), 136.1 ( $\text{C}_2$ ), 134.2 ( $\text{Ph}_{\text{Cbz}}\text{-ipso-C}$ ), 129.5 ( $\text{Ph}_{\text{Cbz}}\text{-C}$ ), 129.2 ( $\text{Ph}_{\text{Cbz}}\text{-C}$ ), 129.1 ( $\text{Ph}_{\text{Cbz}}\text{-C}$ ), 128.5 ( $\text{C}_6$ ), 125.0 ( $\text{C}_4$ ), 123.5 ( $\text{C}_5$ ), 122.0 ( $\text{C}_3$ ), 120.3 ( $\text{C}_7$ ), 118.5 ( $\text{C}_8$ ), 70.3 ( $\text{Ph}_{\text{Cbz}}\text{CH}_2$ ).

FTIR (thin film)  $\text{cm}^{-1}$ :

1753 (s), 1679 (s), 1343 (m), 1224 (s), 1092 (m).

HRMS (DART) ( $m/z$ ):

calc'd for  $\text{C}_{17}\text{H}_{13}\text{BrNO}_3$  [ $\text{M}+\text{H}$ ] $^+$ : 358.0073,  
found: 358.0077.

TLC (20% ethyl acetate in hexanes),  $R_f$ :

0.47 (UV, CAM).

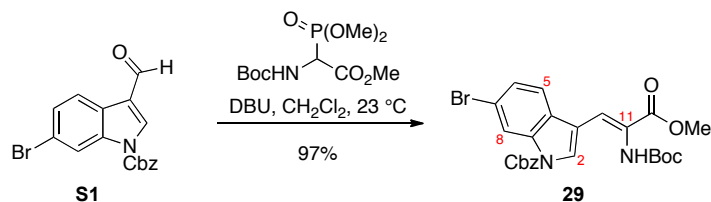

**(Z)-Benzyl 6-bromo-3-(2-((tert-butoxycarbonyl)amino)-3-methoxy-3-oxoprop-1-en-1-yl)-1H-indole-1-carboxylate (29):**

1,8-Diazabicycloundec-7-ene (1.70 mL, 11.4 mmol, 1.20 equiv) was added dropwise to a solution of carboxaldehyde **S1** (3.40 g, 9.49 mmol, 1 equiv) and ( $\pm$ )-Boc- $\alpha$ -phosphonoglycine trimethyl ester (3.39 g, 11.4 mmol, 1.20 equiv) in dichloromethane (32 mL) at 0 °C. The ice-water bath was then removed and the reaction mixture was allowed to warm to 23 °C. After 4 h, the reaction mixture was diluted with dichloromethane (100 mL) and washed with aqueous hydrogen chloride (1 N, 100 mL). The resulting aqueous layer was extracted with dichloromethane (2  $\times$  25 mL). The combined organic layers were dried over anhydrous sodium sulfate, were filtered, and were concentrated under reduced pressure. The resulting oil was purified by flash column chromatography on silica gel (eluent: 20% ethyl acetate in hexanes) to afford the enamide **29** (4.85 g, 97%) as a beige foam. Structural assignments were made using additional information from gCOSY, HSQC, and HMBC experiments.

$^1\text{H}$  NMR (500 MHz,  $\text{CDCl}_3$ , 20 °C):

$\delta$  8.27 (br-s, 1H,  $\text{C}_8\text{H}$ ), 7.74 (br-s, 1H,  $\text{C}_2\text{H}$ ), 7.46–7.33 (m, 1H,  $\text{C}_{12}\text{H}$ ), 7.46–7.33 (m, 1H,  $\text{C}_3\text{H}$ ), 7.46–7.33 (m, 5H,  $\text{Ph}_{\text{Cbz}}\text{-H}$ ), 7.30 (dd,  $J = 1.8, 8.4$ , 1H,  $\text{C}_6\text{H}$ ), 6.44 (s, 1H,  $\text{N}_{10}\text{H}$ ), 5.38 (s, 2H,  $\text{Ph}_{\text{Cbz}}\text{CH}_2$ ), 3.82 (s, 3H,  $\text{OCH}_3$ ), 1.35 (s, 9H,  $\text{C}(\text{CH}_3)_3$ ).

$^{13}\text{C}$  NMR (125.8 MHz,  $\text{CDCl}_3$ , 20 °C):

$\delta$  165.7 ( $\text{C}_{13}$ ), 152.7 ( $\text{C}=\text{O}_{\text{Boc}}$ ), 150.0 ( $\text{C}=\text{O}_{\text{Cbz}}$ ), 135.4 ( $\text{C}_9$ ), 134.5 ( $\text{Ph}_{\text{Cbz}}\text{-ipso-C}$ ), 129.0 ( $\text{Ph}_{\text{Cbz}}\text{-C}$ ), 128.8 ( $\text{Ph}_{\text{Cbz}}\text{-C}$ ), 128.8 ( $\text{Ph}_{\text{Cbz}}\text{-C}$ ), 128.3 ( $\text{C}_{11}$ ), 127.1 ( $\text{C}_2$ ), 126.7 ( $\text{C}_6$ ), 124.2 ( $\text{C}_4$ ), 121.4 ( $\text{C}_{12}$ ), 120.2 ( $\text{C}_5$ ), 118.9 ( $\text{C}_7$ ), 118.3 ( $\text{C}_8$ ), 114.8 ( $\text{C}_3$ ), 81.0 ( $\text{C}(\text{CH}_3)_3$ ), 69.5 ( $\text{Ph}_{\text{Cbz}}\text{CH}_2$ ), 52.6 ( $\text{OCH}_3$ ), 28.1 ( $\text{C}(\text{CH}_3)_3$ ).

FTIR (thin film)  $\text{cm}^{-1}$ :

3324 (br, m), 2979 (m), 1723 (s), 1244 (s), 759 (m).

HRMS (DART) ( $m/z$ ):

calc'd for  $\text{C}_{25}\text{H}_{25}\text{BrN}_2\text{O}_6$  [ $\text{M}$ ] $^+$ : 528.0891, found: 528.0877.

TLC (20% ethyl acetate in hexanes),  $R_f$ :

0.31 (UV, CAM).

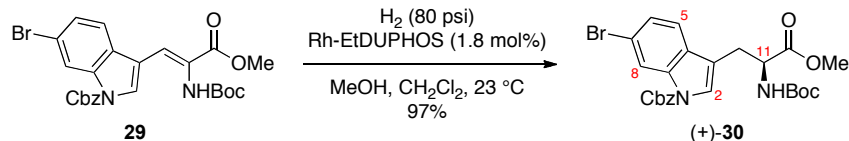

***N*<sup>α</sup>-Boc-*N*<sup>in</sup>-Cbz-6-bromotryptophan methyl ester (+)-30:**

Dichloromethane (7.5 mL) and methanol (7.5 mL) were sequentially added via syringe to a Fischer-Porter tube charged with enamide **29** (4.00 g, 7.56 mmol, 1 equiv) and (+)-1,2-bis((2*S*,5*S*)-2,5-diethylphospholano)benzene(1,5-cyclooctadiene)rhodium(I) trifluoromethanesulfonate (100 mg, 138 μmol, 1.83 mol%). The reaction vessel was charged with hydrogen gas (80 psi) and then discharged (4 cycles). The vessel was charged a final time with hydrogen gas (80 psi) then sealed. After 9.5 h, the Fischer-Porter tube was depressurized and the reaction mixture was concentrated under reduced pressure. The crude reaction mixture was purified by flash column chromatography on silica gel (eluent: 25% ethyl acetate in hexanes) to afford bromotryptophan derivative (+)-**30** (3.88 g, 96.6 %, >99% ee)<sup>6</sup> as a white foam. Structural assignments were made using additional information from gCOSY, HSQC, and HMBC experiments.

<sup>1</sup>H NMR (500 MHz, CDCl<sub>3</sub>, 20 °C):

δ 8.35 (br-s, 1H, C<sub>8</sub>H), 7.48–7.30 (m, 1H, C<sub>2</sub>H), 7.48–7.30 (m, 1H, C<sub>5</sub>H), 7.48–7.30 (m, 1H, C<sub>6</sub>H), 7.48–7.30 (m, 5H, Ph<sub>Cbz</sub>-H), 5.41 (app-s, 2H, Ph<sub>Cbz</sub>-CH<sub>2</sub>), 5.11 (d, *J* = 7.8, 1H, N<sub>10</sub>H), 4.60 (app-q, *J* = 5.8, 1H, C<sub>11</sub>H), 3.64 (s, 3H, OCH<sub>3</sub>), 3.21 (dd, *J* = 5.5, 14.8, 1H, C<sub>12</sub>H<sub>a</sub>), 3.10 (dd, *J* = 5.5, 14.8, 1H, C<sub>12</sub>H<sub>b</sub>), 1.38 (s, 9H, C(CH<sub>3</sub>)<sub>3</sub>).

<sup>13</sup>C NMR (125.8 MHz, CDCl<sub>3</sub>, 20 °C):

δ 172.3 (C<sub>13</sub>), 155.2 (C=O<sub>Boc</sub>), 150.4 (C=O<sub>Cbz</sub>), 136.2 (C<sub>9</sub>), 135.0 (Ph<sub>Cbz</sub>-*ipso*-C), 129.6 (C<sub>4</sub>), 129.0 (Ph<sub>Cbz</sub>-C), 129.0 (Ph<sub>Cbz</sub>-C), 128.7 (Ph<sub>Cbz</sub>-C), 126.4 (C<sub>6</sub>), 124.2 (C<sub>2</sub>), 120.3 (C<sub>5</sub>), 118.8 (C<sub>7</sub>), 118.6 (C<sub>8</sub>), 116.2 (C<sub>3</sub>), 80.3 (C(CH<sub>3</sub>)<sub>3</sub>), 69.2 (Ph<sub>Cbz</sub>-CH<sub>2</sub>), 53.7 (C<sub>11</sub>), 52.6 (OCH<sub>3</sub>), 28.4 (C(CH<sub>3</sub>)<sub>3</sub>), 27.9 (C<sub>12</sub>).

FTIR (thin film) cm<sup>-1</sup>:

3369 (m), 2978 (m), 1742 (s), 1715 (s), 1247 (s).

HRMS (DART) (*m/z*):

calc'd for C<sub>25</sub>H<sub>27</sub>BrN<sub>2</sub>O<sub>6</sub> [M]<sup>+</sup>: 530.1047,  
found: 530.1071.

[α]<sub>D</sub><sup>24</sup>:

+32 (*c* = 0.19, CHCl<sub>3</sub>).

TLC (25% ethyl acetate in hexanes), R<sub>f</sub>:

0.37 (UV, CAM).

<sup>6</sup> In order to determine the enantiopurity, bromotryptophan derivative (+)-**30** was hydrogenated using palladium on carbon in acetic acid to remove the *N*-carboxybenzyl and aryl bromide functional groups. The product was then compared against commercially available enantioenriched *N*-Boc-L-Trp-OMe and *N*-Boc-D-Trp-OMe standards. Chiral HPLC analysis [Chiralpak IC column; 1.0 mL/min; 15% isopropanol in hexanes; *t*<sub>R</sub>(*N*-Boc-L-Trp-OMe) = 10.6 min, *t*<sub>R</sub>(*N*-Boc-D-Trp-OMe) = 13.5 min] showed the enantiopurity to be >99% ee.

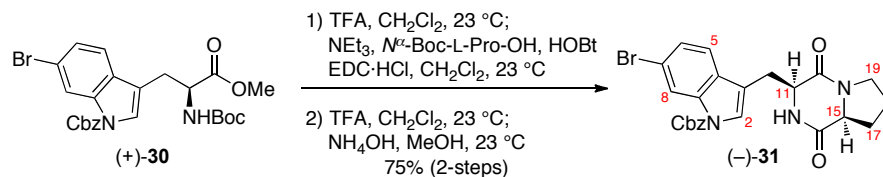

### **Bromoindole diketopiperazine (–)-31:**

Trifluoroacetic acid (15 mL) was added via syringe to a solution of  $N^{\alpha}$ -Boc- $N^{\text{in}}$ -Cbz-L-6-bromotryptophan methyl ester ((+)-**30**) (3.83 g, 7.21 mmol, 1 equiv) in dichloromethane (50 mL) at 23 °C. After 1 h, the brown solution was concentrated under reduced pressure to afford a viscous brown residue, which was dissolved in dichloromethane (100 mL) and cooled to 0 °C in an ice-water bath. Triethylamine (4.52 mL, 32.5 mmol, 4.50 equiv) and  $N$ -hydroxybenzotriazole (1.46 g, 10.8 mmol, 1.50 equiv) and  $N^{\alpha}$ -Boc-L-proline (3.10 g, 14.4 mmol, 2.00 equiv) were sequentially added to the solution. After 2 min, upon dissolution of the  $N^{\alpha}$ -Boc-L-proline, 1-ethyl-3-(3-dimethylaminopropyl) carbodiimide hydrogen chloride (2.07 g, 10.8 mmol, 1.50 equiv) was added and the reaction mixture was allowed to warm to 23 °C. After 1 h, the reaction mixture was diluted with dichloromethane (60 mL) and washed with aqueous hydrogen chloride solution (1 N, 250 mL). The aqueous layer was extracted with dichloromethane (2 × 100 mL). The combined organic layers were washed with saturated aqueous sodium bicarbonate solution (250 mL) and the resulting aqueous layer was extracted with dichloromethane (2 × 25 mL). The combined organic layers were dried over anhydrous sodium sulfate, were filtered, and were concentrated under reduced pressure. The resulting off-white foam was then dissolved in dichloromethane (50 mL) and trifluoroacetic acid (15 mL) was added dropwise to the solution. After 1 h, the solution was concentrated under reduced pressure. The viscous residue was dissolved in methanol (200 mL) and cooled to 0 °C. Ammonium hydroxide (28–30% ammonia, 10 mL) was added dropwise and the reaction mixture was allowed to warm to 23 °C. After 22 h, the reaction mixture was cooled to –78 °C and filtered. The white precipitate was washed with methanol (2 × 50 mL), which had been cooled to 0 °C in an ice-water bath, and was dried under reduced pressure at 23 °C to afford diketopiperazine (–)-**31** (2.68 g, 74.9%, 2-steps) as a fluffy white solid. Structural assignments were made using additional information from gCOSY, HSQC, and HMBC experiments.

$^1\text{H}$  NMR (500 MHz, DMSO- $d_6$ , 20 °C):

$\delta$  8.21 (s, 1H, C<sub>3</sub>H), 8.13 (s, 1H, N<sub>10</sub>H), 7.66 (d,  $J$  = 8.4, 1H, C<sub>5</sub>H), 7.61 (s, 1H, C<sub>2</sub>H), 7.53 (d,  $J$  = 6.8, 2H, Ph<sub>Cbz</sub>-*o*-H), 7.47–7.37 (m, 1H, C<sub>6</sub>H), 7.47–7.37 (m, 3H, Ph<sub>Cbz</sub>-H), 5.46 (app-s, 2H, Ph<sub>Cbz</sub>CH<sub>2</sub>), 4.42 (app-t,  $J$  = 5.2, 1H, C<sub>11</sub>H), 4.11 (app-t,  $J$  = 8.5, 1H, C<sub>15</sub>H), 3.38–3.24 (m, 2H, C<sub>19</sub>H), 3.17 (dd,  $J$  = 5.2, 15.3, 1H, C<sub>12</sub>H<sub>a</sub>), 3.05 (dd,  $J$  = 5.2, 15.3, 1H, C<sub>12</sub>H<sub>b</sub>), 2.10–2.00 (m, 1H, C<sub>17</sub>H<sub>a</sub>), 1.80–1.63 (m, 2H, C<sub>18</sub>H), 1.61–1.47 (m, 1H, C<sub>17</sub>H<sub>b</sub>).

$^{13}\text{C}$  NMR (125.8 MHz, DMSO- $d_6$ , 20 °C):

$\delta$  169.3 (C<sub>16</sub>), 165.1 (C<sub>13</sub>), 149.9 (C=O<sub>Cbz</sub>), 135.3 (C<sub>9</sub>), 135.2 (Ph<sub>Cbz</sub>-*ipso*-C), 129.6 (C<sub>4</sub>), 128.7 (Ph<sub>Cbz</sub>-C), 128.6 (Ph<sub>Cbz</sub>-C), 128.4 (Ph<sub>Cbz</sub>-C), 125.6 (C<sub>6</sub>), 124.9 (C<sub>2</sub>), 121.7 (C<sub>5</sub>), 117.3 (C<sub>7</sub>), 117.1 (C<sub>8</sub>), 116.8 (C<sub>3</sub>), 68.6 (Ph<sub>Cbz</sub>CH<sub>2</sub>), 58.5 (C<sub>15</sub>), 54.3 (C<sub>11</sub>), 44.7 (C<sub>19</sub>), 27.8 (C<sub>17</sub>), 24.8 (C<sub>12</sub>), 22.0 (C<sub>18</sub>).

FTIR (thin film)  $\text{cm}^{-1}$ : 3584 (s), 1737 (s), 1668 (s), 1434 (m), 1247 (m), 1084 (w).

HRMS (DART) ( $m/z$ ): calc'd for  $\text{C}_{24}\text{H}_{23}\text{BrN}_3\text{O}_4$   $[\text{M}+\text{H}]^+$ : 496.0866, found: 496.0870.

$[\alpha]_{\text{D}}^{24}$ :  $-33$  ( $c = 0.09$ , DMSO).

TLC (30% acetone in dichloromethane),  $R_f$ : 0.31 (UV, CAM).



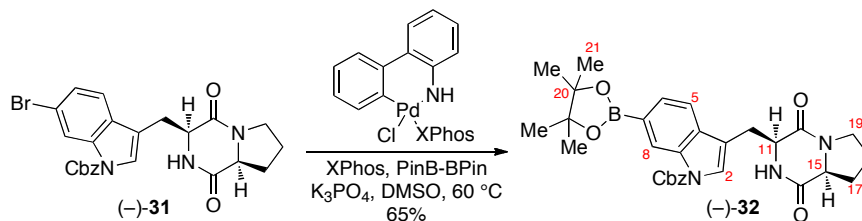

### Pinacol boronic ester (-)-32:

A 25-mL round bottom flask was charged with diketopiperazine (-)-31 (500 mg, 1.01 mmol, 1 equiv), aminobiphenyl(XPhos)palladium chloride precatalyst complex (39.6 mg, 50.4  $\mu$ mol, 5.00 mol%), XPhos (72.2 mg, 151  $\mu$ mol, 15.0 mol%), bis(pinacolato)diboron (769 mg, 3.03 mmol, 3.00 equiv), and tribasic potassium phosphate (643 mg, 3.03 mmol, 3.00 equiv). The flask was then evacuated and charged with argon (3 cycles). Dimethyl sulfoxide (10 mL) was introduced to the flask via syringe and the initial suspension was warmed to 60 °C. After 2.5 h, the black solution was cooled to 23 °C, diluted with ethyl acetate (125 mL), and washed with saturated aqueous sodium bicarbonate solution (250 mL). The resulting aqueous layer was extracted with ethyl acetate (2  $\times$  125 mL), and the combined organic layers were dried over anhydrous sodium sulfate, were filtered, and were concentrated under reduced pressure. The crude reaction mixture was then purified by flash column chromatography on silica gel (eluent: 3% acetone in ethyl acetate) to afford pinacol boronic ester (-)-32 (356 mg, 65.0%) as a white foam. Structural assignments were made using additional information from gCOSY, HSQC, and HMBC experiments.

$^1\text{H}$  NMR (500 MHz,  $\text{CDCl}_3$ , 20 °C):

$\delta$  8.61 (br-s, 1H,  $\text{C}_8\text{H}$ ), 7.65 (d,  $J = 7.8$ , 1H,  $\text{C}_6\text{H}$ ), 7.59 (s, 1H,  $\text{C}_2\text{H}$ ), 7.51 (d,  $J = 7.9$ , 1H,  $\text{C}_5\text{H}$ ), 7.42 (d,  $J = 7.1$ , 2H,  $\text{Ph}_{\text{Cbz-}o}\text{-H}$ ), 7.36–7.26 (m, 3H,  $\text{Ph}_{\text{Cbz}}\text{-H}$ ), 6.79 (s, 1H,  $\text{N}_{10}\text{H}$ ), 5.35 (app-s, 2H,  $\text{Ph}_{\text{Cbz}}\text{CH}_2$ ), 4.25 (app-d,  $J = 7.2$ , 1H,  $\text{C}_{11}\text{H}$ ), 3.84 (app-t,  $J = 7.1$ , 1H,  $\text{C}_{15}\text{H}$ ), 3.56 (dd,  $J = 2.7$ , 15.2, 1H,  $\text{C}_{12}\text{H}_a$ ), 3.53–3.37 (m, 2H,  $\text{C}_{19}\text{H}$ ), 2.90 (dd,  $J = 9.5$ , 15.3, 1H,  $\text{C}_{12}\text{H}_b$ ), 2.17–2.05 (m, 1H,  $\text{C}_{17}\text{H}_a$ ), 1.88–1.64 (m, 1H,  $\text{C}_{17}\text{H}_b$ ), 1.88–1.64 (m, 2H,  $\text{C}_{18}\text{H}$ ), 1.29 (s, 12H,  $\text{OC}(\text{CH}_3)_2\text{pinacol}$ ).

$^{13}\text{C}$  NMR (125.8 MHz,  $\text{CDCl}_3$ , 20 °C):

$\delta$  169.8 ( $\text{C}_{16}$ ), 165.0 ( $\text{C}_{13}$ ), 150.3 ( $\text{C}=\text{O}_{\text{Cbz}}$ ), 135.3 ( $\text{C}_9$ ), 135.0 ( $\text{Ph}_{\text{Cbz-}ipso}\text{-C}$ ), 132.3 ( $\text{C}_4$ ), 129.0 ( $\text{C}_6$ ), 128.6 ( $\text{Ph}_{\text{Cbz}}\text{-C}$ ), 128.6 ( $\text{Ph}_{\text{Cbz}}\text{-C}$ ), 128.4 ( $\text{Ph}_{\text{Cbz}}\text{-C}$ ), 125.4 ( $\text{C}_2$ ), 125.4 ( $\text{C}_7$ ), 121.8 ( $\text{C}_8$ ), 118.2 ( $\text{C}_5$ ), 116.1 ( $\text{C}_3$ ), 83.7 ( $\text{OC}(\text{CH}_3)_2\text{pinacol}$ ), 68.7 ( $\text{Ph}_{\text{Cbz}}\text{CH}_2$ ), 58.9 ( $\text{C}_{15}$ ), 54.3 ( $\text{C}_{11}$ ), 45.3 ( $\text{C}_{19}$ ), 28.0 ( $\text{C}_{17}$ ), 26.1 ( $\text{C}_{12}$ ), 24.8 ( $\text{OC}(\text{CH}_3)_2\text{pinacol}$ ), 22.5 ( $\text{C}_{18}$ ).

FTIR (thin film)  $\text{cm}^{-1}$ :

2978 (m), 1738 (s), 1673 (s), 1432 (s), 1354 (s).

HRMS (DART) ( $m/z$ ):

calc'd for  $\text{C}_{30}\text{H}_{35}\text{BN}_3\text{O}_6$  [ $\text{M}+\text{H}$ ] $^+$ : 544.2613,  
found: 544.2613.

$[\alpha]_D^{23}$ :

-63 ( $c = 0.2$ ,  $\text{CHCl}_3$ ).

TLC (3% acetone in ethyl acetate),  $R_f$ :

0.20 (UV, CAM).

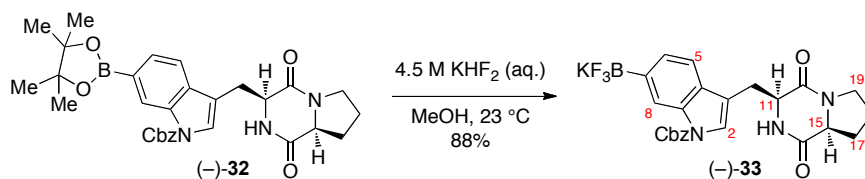

### Potassium trifluoroborateindole (-)-33:

An aqueous solution of potassium hydrogen fluoride (4.5 M, 4.73 mL, 21.3 mmol, 20.0 equiv) was added dropwise to a solution of pinacol boronic ester (-)-**32** (578 mg, 1.06 mmol, 1 equiv) in methanol (15 mL) at 23 °C. After 1.5 h, the turbid solution was concentrated to dryness under reduced pressure. The white solid residue was suspended in a dichloromethane and hexanes solution (1:1, 50 mL) and filtered over Celite to remove the pinacol byproduct. After further washing with a dichloromethane and hexanes solution (1:1, 50 mL), the solids were extracted with acetone (80 mL) and the filtrate was concentrated under reduced pressure to afford potassium 6-trifluoroborateindole (-)-**33** (489 mg, 87.8%) as a beige solid. Structural assignments were made using additional information from gCOSY, HSQC, and HMBC experiments.

$^1\text{H}$  NMR (500 MHz, acetone- $d_6$ , 20 °C):

$\delta$  8.40 (s, 1H, C<sub>3</sub>H), 7.54 (d,  $J = 7.3$ , 2H, Ph<sub>Cbz</sub>-*o*-H), 7.52 (s, 1H, C<sub>2</sub>H), 7.45 (d,  $J = 7.7$ , 1H, C<sub>6</sub>H), 7.43–7.39 (m, 3H, Ph<sub>Cbz</sub>-H), 7.36 (d,  $J = 7.5$ , 1H, C<sub>5</sub>H), 6.79 (s, 1H, N<sub>10</sub>H), 5.44 (app-s, 2H, Ph<sub>Cbz</sub>CH<sub>2</sub>), 4.41 (dd,  $J = 3.6, 8.3$ , 1H, C<sub>11</sub>H), 4.10 (app-t,  $J = 8.1$ , 1H, C<sub>15</sub>H), 3.54–3.43 (m, 1H, C<sub>12</sub>H<sub>a</sub>), 3.54–3.43 (m, 1H, C<sub>19</sub>H<sub>a</sub>), 3.42–3.33 (m, 1H, C<sub>19</sub>H<sub>b</sub>), 2.96 (dd,  $J = 8.3, 15.5$ , 1H, C<sub>12</sub>H<sub>b</sub>), 2.18–2.07 (m, 1H, C<sub>17</sub>H<sub>a</sub>), 1.85–1.70 (m, 1H, C<sub>17</sub>H<sub>b</sub>), 1.85–1.70 (m, 2H, C<sub>18</sub>H).

$^{13}\text{C}$  NMR (125.8 MHz, acetone- $d_6$ , 20 °C)<sup>7</sup>:

$\delta$  170.1 (C<sub>16</sub>), 166.1 (C<sub>13</sub>), 151.3 (C<sub>Cbz</sub>=O), 136.9 (Ph<sub>Cbz</sub>-*ipso*-C), 136.5 (C<sub>9</sub>), 129.3 (Ph<sub>Cbz</sub>-C), 129.0 (Ph<sub>Cbz</sub>-C), 129.0 (Ph<sub>Cbz</sub>-C), 129.0 (C<sub>4</sub>), 127.7 (C<sub>6</sub>), 123.0 (C<sub>2</sub>), 118.5 (C<sub>8</sub>), 117.6 (C<sub>3</sub>), 117.5 (C<sub>5</sub>), 68.4 (Ph<sub>Cbz</sub>CH<sub>2</sub>), 59.5 (C<sub>15</sub>), 55.2 (C<sub>11</sub>), 45.6 (C<sub>19</sub>), 28.7 (C<sub>17</sub>), 26.6 (C<sub>12</sub>), 23.0 (C<sub>18</sub>).

$^{19}\text{F}$  NMR (282.4 MHz, acetone- $d_6$ , 20 °C):

$\delta$  -141.0 (C<sub>6</sub>BF<sub>3</sub>K).

FTIR (thin film) cm<sup>-1</sup>:

3583 (br, s), 1726 (m), 1666 (s), 1422 (m), 1255 (m).

HRMS (ESI) ( $m/z$ ):

calc'd for C<sub>24</sub>H<sub>22</sub>BF<sub>3</sub>N<sub>3</sub>O<sub>4</sub> [M-K]<sup>-</sup>: 484.1661,  
found: 484.1643.

$[\alpha]_D^{21}$ :

-42 ( $c = 0.14$ , acetone).

<sup>7</sup> C<sub>7</sub> is not observed in the  $^{13}\text{C}$  NMR spectrum. For other examples of unobservable carbon atoms *ipso* to the trifluoroborate functional group, see: Molander, G.; Argintaru, O. A.; Aron, I.; Dreher, S. D. *Org. Lett.* **2010**, *12*, 5783.

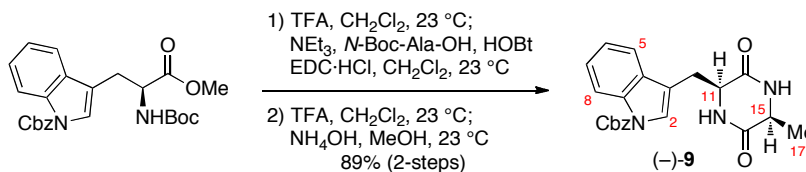

### **Alanine diketopiperazine (-)-**9****:

Trifluoroacetic acid (30 mL) was added via syringe to a solution of *N*<sup>α</sup>-Boc-*N*<sup>in</sup>-Cbz-L-tryptophan methyl ester<sup>8</sup> (9.0 g, 19.9 mmol, 1 equiv) in dichloromethane (100 mL) at 23 °C. After 1 h, the brown solution was concentrated under reduced pressure to afford a viscous brown residue, which was dissolved in dichloromethane (200 mL) and cooled to 0 °C in an ice-water bath. Triethylamine (12.5 mL, 89.5 mmol, 4.50 equiv) was added dropwise via syringe. *N*-hydroxybenzotriazole (4.03 g, 29.8 mmol, 1.50 equiv) and *N*<sup>α</sup>-Boc-L-alanine (7.53 g, 39.8 mmol, 2.00 equiv) were sequentially added to the resulting solution. After 2 min, upon dissolution of the *N*<sup>α</sup>-Boc-L-alanine, 1-ethyl-3-(3-dimethylaminopropyl) carbodiimide hydrogen chloride (5.72 g, 29.8 mmol, 1.50 equiv) was added and the reaction mixture was allowed to warm to 23 °C. After 13.5 h, aqueous hydrogen chloride solution (1 N, 500 mL) was added and the aqueous layer was extracted with dichloromethane (2 × 100 mL). The combined organic layers were washed with saturated aqueous sodium bicarbonate solution (500 mL) and the resulting aqueous layer was extracted with dichloromethane (2 × 100 mL). The combined organic layers were dried over anhydrous sodium sulfate, were filtered, and were concentrated under reduced pressure. The resulting off-white foam was then dissolved in dichloromethane (100 mL) and trifluoroacetic acid (30 mL) was added dropwise to the solution. After 2 h, the solution was concentrated under reduced pressure. The viscous residue was dissolved in methanol (300 mL) and cooled to 0 °C. Ammonium hydroxide (28–30% ammonia, 10.5 mL) was added dropwise and the reaction mixture was allowed to warm to 23 °C. After 23 h, the white precipitate was filtered and washed with methanol (2 × 50 mL), which had been cooled to 0 °C in an ice-water bath. The white powder was dried under reduced pressure at 23 °C to afford diketopiperazine (-)-**9** (6.7 g, 89%, 2-steps). Structural assignments were made using additional information from gCOSY, HSQC, and HMBC experiments.

<sup>1</sup>H NMR (500 MHz, DMSO-*d*<sub>6</sub>, 20 °C):

δ 8.17 (s, 1H, N<sub>14</sub>H), 8.10 (s, 1H, N<sub>10</sub>H), 8.06 (d, *J* = 8.1, 1H, C<sub>8</sub>H), 7.67 (d, *J* = 7.8, 1H, C<sub>3</sub>H), 7.51 (d, *J* = 6.3, 2H, Ph<sub>Cbz</sub>-*o*-H), 7.51 (s, 1H, C<sub>2</sub>H), 7.43 (app-t, *J* = 7.0, 2H, Ph<sub>Cbz</sub>-*m*-H), 7.38 (t, *J* = 7.1, 1H, Ph<sub>Cbz</sub>-*p*-H), 7.32 (app-t, *J* = 7.3, 1H, C<sub>7</sub>H), 7.25 (app-t, *J* = 7.9, 1H, C<sub>6</sub>H), 5.47 (app-s, 2H, Ph<sub>Cbz</sub>CH<sub>2</sub>), 4.22 (app-t, *J* = 4.3, 1H, C<sub>11</sub>H), 3.71 (q, *J* = 7.0, 1H, C<sub>15</sub>H), 3.20 (dd, *J* = 4.4, 14.7, 1H, C<sub>12</sub>H<sub>a</sub>), 3.03 (dd, *J* = 4.6, 14.6, 1H, C<sub>12</sub>H<sub>b</sub>), 0.66 (d, *J* = 7.0, 3H, C<sub>17</sub>H).

<sup>13</sup>C NMR (125.8 MHz, DMSO-*d*<sub>6</sub>, 20 °C):

δ 168.0 (C<sub>16</sub>), 166.6 (C<sub>13</sub>), 150.1 (C=O<sub>Cbz</sub>), 135.4 (Ph<sub>Cbz</sub>-*ipso*-C), 134.6 (C<sub>9</sub>), 130.6 (C<sub>4</sub>), 128.7 (Ph<sub>Cbz</sub>-C), 128.5 (Ph<sub>Cbz</sub>-C), 128.2 (Ph<sub>Cbz</sub>-C), 124.6 (C<sub>7</sub>), 124.3 (C<sub>2</sub>), 122.8 (C<sub>6</sub>), 120.0 (C<sub>5</sub>), 116.2

<sup>8</sup> Prepared from commercially available *N*<sup>α</sup>-Boc-tryptophan methyl ester in one step: Kiso, Y.; Inai, M.; Kitagawa, K.; Akita, T. *Chem. Lett.* **1983**, 5, 739.

|                                                        |                                                                                                                                                                                            |
|--------------------------------------------------------|--------------------------------------------------------------------------------------------------------------------------------------------------------------------------------------------|
|                                                        | (C <sub>3</sub> ), 114.4 (C <sub>8</sub> ), 68.3 (Ph <sub>Cbz</sub> CH <sub>2</sub> ), 54.4 (C <sub>11</sub> ), 49.7 (C <sub>15</sub> ), 27.9 (C <sub>12</sub> ), 19.5 (C <sub>17</sub> ). |
| FTIR (thin film) cm <sup>-1</sup> :                    | 3584 (m), 3050 (br, s), 1739 (m), 1678 (s), 1453 (m), 1244 (m).                                                                                                                            |
| HRMS (DART) ( <i>m/z</i> ):                            | calc'd for C <sub>22</sub> H <sub>20</sub> N <sub>3</sub> O <sub>4</sub> [M-H] <sup>-</sup> : 390.1459,<br>found: 390.1458.                                                                |
| [α] <sub>D</sub> <sup>24</sup> :                       | -12 ( <i>c</i> = 0.17, DMSO).                                                                                                                                                              |
| TLC (5% methanol in dichloromethane), R <sub>f</sub> : | 0.59 (UV, CAM).                                                                                                                                                                            |

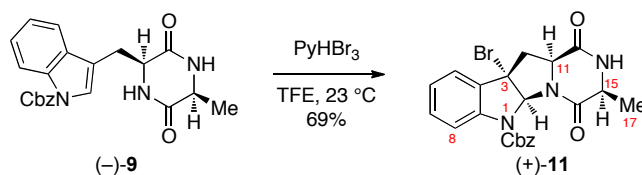

### **Tetracyclic bromide A (+)-11:**

Pyridinium tribromide (4.24 g, 13.3 mmol, 2.00 equiv) was added to a suspension of diketopiperazine (-)-**9** (2.50 g, 6.62 mmol, 1 equiv) in 2,2,2-trifluoroethanol (132 mL) at 23 °C. After 20 min, once the white solids have fully dissolved, a solution of saturated aqueous sodium thiosulfate (100 mL) was added. The reaction mixture was diluted with dichloromethane (200 mL) and washed with saturated aqueous sodium thiosulfate (200 mL). The resulting aqueous solution was further extracted with dichloromethane (2 × 150 mL) and the combined organic layers were dried over anhydrous sodium sulfate, were filtered, and were concentrated under reduced pressure. The crude reaction mixture was then purified by flash column chromatography on silica gel (eluent: 60% ethyl acetate in hexanes) to afford tetracyclic bromide (+)-**11** (2.08 g, 69.2%) as a white foam. Structural assignments were made using additional information from gCOSY, HSQC, and HMBC experiments.

$^1\text{H}$  NMR (500 MHz,  $\text{CDCl}_3$ , 20 °C):

$\delta$  7.65 (d,  $J = 8.1$ , 1H,  $\text{C}_8\text{H}$ ), 7.44 (d,  $J = 7.2$ , 2H,  $\text{Ph}_{\text{Cbz-}o\text{-H}}$ ), 7.40 (d,  $J = 7.6$ , 1H,  $\text{C}_5\text{H}$ ), 7.37 (app-t,  $J = 7.0$ , 2H,  $\text{Ph}_{\text{Cbz-}m\text{-H}}$ ), 7.32 (t,  $J = 7.2$ , 1H,  $\text{Ph}_{\text{Cbz-}p\text{-H}}$ ), 7.24 (app-t,  $J = 7.6$ , 1H,  $\text{C}_7\text{H}$ ), 7.06 (app-t,  $J = 7.5$ , 1H,  $\text{C}_6\text{H}$ ), 6.32 (s, 1H,  $\text{C}_2\text{H}$ ), 6.21 (s, 1H,  $\text{N}_{14}\text{H}$ ), 5.42 (d,  $J = 12.2$ , 1H,  $\text{Ph}_{\text{Cbz}}\text{CH}_a$ ), 5.32 (d,  $J = 12.2$ , 1H,  $\text{Ph}_{\text{Cbz}}\text{CH}_b$ ), 4.32 (dd,  $J = 3.5$ , 10.1, 1H,  $\text{C}_{11}\text{H}$ ), 3.93 (q,  $J = 6.7$ , 1H,  $\text{C}_{15}\text{H}$ ), 3.69 (dd,  $J = 3.5$ , 14.1, 1H,  $\text{C}_{12}\text{H}_a$ ), 3.06 (dd,  $J = 10.2$ , 14.2, 1H,  $\text{C}_{12}\text{H}_b$ ), 1.29 (d,  $J = 6.8$ , 3H,  $\text{C}_{17}\text{H}$ ).

$^{13}\text{C}$  NMR (125.8 MHz,  $\text{CDCl}_3$ , 20 °C):

$\delta$  168.9 ( $\text{C}_{13}$ ), 167.3 ( $\text{C}_{16}$ ), 152.9 ( $\text{C}=\text{O}_{\text{Cbz}}$ ), 139.4 ( $\text{C}_9$ ), 135.8 ( $\text{Ph}_{\text{Cbz-}ipso\text{-C}}$ ), 132.7 ( $\text{C}_4$ ), 130.9 ( $\text{C}_7$ ), 128.6 ( $\text{Ph}_{\text{Cbz-}C}$ ), 128.3 ( $\text{Ph}_{\text{Cbz-}C}$ ), 128.2 ( $\text{Ph}_{\text{Cbz-}C}$ ), 124.7 ( $\text{C}_6$ ), 124.6 ( $\text{C}_5$ ), 116.8 ( $\text{C}_8$ ), 84.6 ( $\text{C}_2$ ), 68.3 ( $\text{Ph}_{\text{Cbz}}\text{CH}_2$ ), 60.3 ( $\text{C}_3$ ), 58.0 ( $\text{C}_{11}$ ), 51.4 ( $\text{C}_{15}$ ), 37.6 ( $\text{C}_{12}$ ), 14.8 ( $\text{C}_{17}$ ).

FTIR (thin film)  $\text{cm}^{-1}$ :

3273 (br-m), 1720 (s), 1692 (s), 1408 (m), 752 (m).

HRMS (ESI) ( $m/z$ ):

calc'd for  $\text{C}_{22}\text{H}_{21}\text{BrN}_3\text{O}_4$   $[\text{M}+\text{H}]^+$ : 470.0710, found 470.0692.

$[\alpha]_D^{25}$ :

+71 ( $c = 0.09$ ,  $\text{CHCl}_3$ ).

TLC (60% ethyl acetate in hexanes),  $R_f$ :

0.20 (UV, CAM).

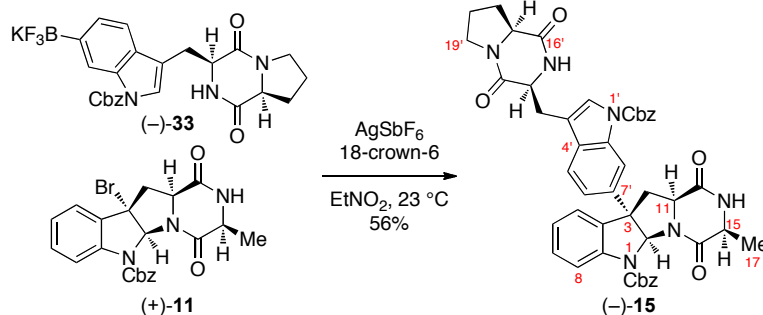

### **(-)-*N*<sup>in</sup>,*N*<sup>ini</sup>-Dicarboxybenzyl Nasesezine A (15):**

Silver(I) hexafluoroantimonate (73.1 mg, 213 μmol, 5.00 equiv) was added as a solid to a solution of tetracyclic bromide (+)-**11** (20.0 mg, 42.5 μmol, 1 equiv), potassium 6-trifluoroborateindole (-)-**33** (33.4 mg, 63.8 μmol, 1.50 equiv), and 18-crown-6 (56.2 mg, 213 μmol, 5.00 equiv) in nitroethane (2 mL) at 23 °C. After 1 h, aqueous hydrogen chloride (2 N, 2 mL) was added. After stirring for 5 min, the reaction mixture was diluted with dichloromethane (60 mL) and washed with aqueous hydrogen chloride (2 N, 60 mL). The resulting aqueous layer was further extracted with dichloromethane (2 × 30 mL) and the combined organic layers were dried over anhydrous sodium sulfate, were filtered, and were concentrated under reduced pressure. The crude reaction mixture was purified by flash column chromatography on silica gel (eluent: 8% methanol in ethyl acetate) to afford (-)-*N*<sup>in</sup>,*N*<sup>ini</sup>-dicarboxybenzyl nasesezine A (**15**) (19.3 mg, 56.2%) as a white solid. Structural assignments were made using additional information from gCOSY, HSQC, and HMBC experiments.

<sup>1</sup>H NMR (500 MHz, CDCl<sub>3</sub>, 20 °C):

δ 8.11 (br-s, 1H, C<sub>8</sub>H), 7.62 (d, *J* = 7.8, 1H, C<sub>8</sub>H), 7.46 (s, 1H, C<sub>2</sub>H), 7.40 (d, *J* = 7.0, 2H, Ph<sub>Cbz</sub>-*o*-H), 7.37–7.28 (m, 5H, Ph<sub>Cbz</sub>-H), 7.37–7.28 (m, 1H, C<sub>5</sub>H), 7.28–7.20 (m, 3H, Ph<sub>Cbz</sub>-H), 7.15 (app-t, *J* = 7.6, 1H, C<sub>7</sub>H), 7.05 (d, *J* = 7.2, 1H, C<sub>5</sub>H), 6.93 (app-t, *J* = 7.4, 1H, C<sub>6</sub>H), 6.90 (d, *J* = 8.4, 1H, C<sub>6</sub>H), 6.41 (s, 1H, N<sub>10</sub>H), 6.28 (s, 1H, N<sub>14</sub>H), 6.28 (s, 1H, C<sub>2</sub>H), 5.38–5.21 (m, 4H, Ph<sub>Cbz</sub>CH<sub>2</sub>), 4.29 (d, *J* = 9.5, 1H, C<sub>11</sub>H), 4.18 (br-s, 1H, C<sub>11</sub>H), 4.01 (app-t, *J* = 7.5, 1H, C<sub>15</sub>H), 3.91 (q, *J* = 6.8, 1H, C<sub>15</sub>H), 3.64–3.47 (m, 2H, C<sub>19</sub>H), 3.64–3.47 (m, 1H, C<sub>12</sub>H<sub>a</sub>), 3.30 (d, *J* = 12.9, 1H, C<sub>12</sub>H<sub>a</sub>), 2.85 (dd, *J* = 10.7, 15.5, 1H, C<sub>12</sub>H<sub>b</sub>), 2.81–2.70 (m, 1H, C<sub>12</sub>H<sub>b</sub>), 2.33–2.21 (m, 1H, C<sub>17</sub>H<sub>a</sub>), 2.04–1.91 (m, 1H, C<sub>17</sub>H<sub>b</sub>), 2.04–1.91 (m, 1H, C<sub>18</sub>H<sub>a</sub>), 1.91–1.78 (m, 1H, C<sub>18</sub>H<sub>b</sub>), 1.30 (d, *J* = 6.7, 3H, C<sub>17</sub>H).

<sup>13</sup>C NMR (125.8 MHz, CDCl<sub>3</sub>, 20 °C):

δ 170.0 (C<sub>16</sub>), 169.6 (C<sub>13</sub>), 167.7 (C<sub>16</sub>), 165.2 (C<sub>13</sub>), 153.2 (C<sub>Cbz</sub>=O), 150.6 (C<sub>Cbz</sub>=O), 140.0 (C<sub>9</sub>), 139.3 (C<sub>7</sub>), 136.3 (Ph<sub>Cbz</sub>-*ipso*-C), 135.0 (C<sub>4</sub>), 135.0 (C<sub>9</sub>), 135.0 (Ph<sub>Cbz</sub>'-*ipso*-C), 129.5 (C<sub>4</sub>), 129.2 (C<sub>7</sub>), 129.1 (Ph<sub>Cbz</sub>-C), 129.0 (Ph<sub>Cbz</sub>-C), 129.0 (Ph<sub>Cbz</sub>-C), 128.6 (Ph<sub>Cbz</sub>-C), 128.2 (Ph<sub>Cbz</sub>-C), 128.2 (Ph<sub>Cbz</sub>-C), 125.3 (C<sub>5</sub>), 124.7 (C<sub>2</sub>), 124.3 (C<sub>6</sub>), 121.4 (C<sub>6</sub>), 119.5 (C<sub>5</sub>), 117.0 (C<sub>8</sub>), 116.1 (C<sub>3</sub>), 113.2 (C<sub>8</sub>), 83.9 (C<sub>2</sub>), 69.1 (Ph<sub>Cbz</sub>CH<sub>2</sub>), 68.1 (Ph<sub>Cbz</sub>CH<sub>2</sub>), 59.3 (C<sub>15</sub>), 58.9

|                                                        |                                                                                                                                                                                                                                                       |
|--------------------------------------------------------|-------------------------------------------------------------------------------------------------------------------------------------------------------------------------------------------------------------------------------------------------------|
|                                                        | (C <sub>3</sub> ), 58.5 (C <sub>11</sub> ), 54.2 (C <sub>11'</sub> ), 51.9 (C <sub>15</sub> ), 45.7 (C <sub>19</sub> ), 35.4 (C <sub>12</sub> ), 28.4 (C <sub>17</sub> ), 26.4 (C <sub>12'</sub> ), 22.8 (C <sub>18</sub> ), 15.3 (C <sub>17</sub> ). |
| FTIR (thin film) cm <sup>-1</sup> :                    | 3226 (br, m), 1688 (s), 1399 (m), 1308 (m), 751 (m).                                                                                                                                                                                                  |
| HRMS (DART) ( <i>m/z</i> ):                            | calc'd for C <sub>46</sub> H <sub>43</sub> N <sub>6</sub> O <sub>8</sub> [M+H] <sup>+</sup> : 807.3137<br>found: 807.3116.                                                                                                                            |
| [α] <sub>D</sub> <sup>24</sup> :                       | -42 ( <i>c</i> = 0.38, CHCl <sub>3</sub> ).                                                                                                                                                                                                           |
| TLC (7.5% methanol in ethyl acetate), R <sub>f</sub> : | 0.11 (UV, CAM).                                                                                                                                                                                                                                       |

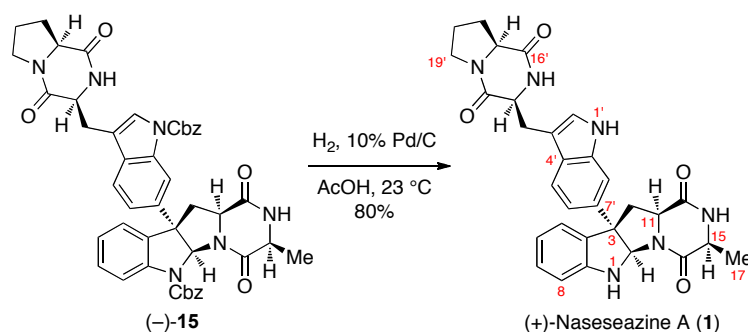

### **(+)-Naseseazine A (1):**

Palladium on charcoal (10% w/w, 1.0 mg, 905 nmol, 0.10 equiv) was added to a solution of (-)-*N*<sup>in</sup>,*N*<sup>ini</sup>-dicarboxybenzyl naseseazine A (**15**) (7.3 mg, 9.05 μmol, 1 equiv) in acetic acid (1 mL) at 23 °C. A stream of hydrogen gas was passed through the solution for 2 min by discharge of a balloon equipped with a needle extending into the reaction mixture. After stirring the solution for 9 h under an atmosphere of hydrogen gas, the solution was filtered over Celite. The solids were further extracted with methanol and the combined filtrates were concentrated under reduced pressure. The crude reaction mixture was purified by flash column chromatography on silica gel (eluent: 5% methanol, 45% tetrahydrofuran, 50% dichloromethane) to afford (+)-naseseazine A (**1**) (4.1 mg, 80%) as a white solid. Structural assignments were made using additional information from gCOSY, HSQC, HMBC, and ROESY experiments.

<sup>1</sup>H NMR (500 MHz, methanol-*d*<sub>4</sub>, 20 °C):

δ 7.57 (d, *J* = 8.4, 1H, C<sub>5</sub>**H**), 7.40 (d, *J* = 1.3, 1H, C<sub>8</sub>**H**), 7.12 (s, 1H, C<sub>2</sub>**H**), 7.05 (app-dt, *J* = 1.3, 7.9, 1H, C<sub>7</sub>**H**), 7.03 (dd, *J* = 1.7, 8.4, 1H, C<sub>6</sub>**H**), 6.85 (dd, *J* = 0.6, 7.4, 1H, C<sub>5</sub>**H**), 6.69 (d, *J* = 8.0, 1H, C<sub>8</sub>**H**), 6.68 (app-dt, *J* = 0.9, 7.4, 1H, C<sub>6</sub>**H**), 5.83 (s, 1H, C<sub>2</sub>**H**), 4.65 (dd, *J* = 7.4, 9.2, 1H, C<sub>11</sub>**H**), 4.39 (dt, *J* = 1.1, 4.7, 1H, C<sub>11</sub>**H**), 4.16 (dq, *J* = 1.4, 6.9, 1H, C<sub>15</sub>**H**), 3.98 (ddd, *J* = 1.7, 6.3, 10.9, 1H, C<sub>15</sub>**H**), 3.42 (app-dt, *J* = 8.3, 11.7, 1H, C<sub>19</sub>**H**<sub>a</sub>), 3.30–3.20 (m, 1H, C<sub>19</sub>**H**<sub>b</sub>), 3.30–3.20 (m, 2H, C<sub>12</sub>**H**), 3.30–3.20 (m, 1H, C<sub>12</sub>**H**<sub>a</sub>), 2.59 (dd, *J* = 9.9, 13.6, 1H, C<sub>12</sub>**H**<sub>b</sub>), 1.96 (app-ddt, *J* = 2.0, 7.2, 12.5, 1H, C<sub>17</sub>**H**<sub>a</sub>), 1.72–1.61 (m, 1H, C<sub>18</sub>**H**<sub>a</sub>), 1.47–1.39 (m, 1H, C<sub>18</sub>**H**<sub>b</sub>), 1.38 (d, *J* = 7.1, 3H, C<sub>17</sub>**H**), 0.96–0.85 (m, 1H, C<sub>17</sub>**H**<sub>b</sub>).

<sup>1</sup>H NMR (500 MHz, DMSO-*d*<sub>6</sub>, 20 °C):

δ 10.81 (s, 1H, N<sub>1</sub>**H**), 8.20 (s, 1H, N<sub>14</sub>**H**), 7.71 (s, 1H, N<sub>10</sub>**H**), 7.56 (d, *J* = 8.4, 1H, C<sub>5</sub>**H**), 7.28 (s, 1H, C<sub>8</sub>**H**), 7.19 (d, *J* = 1.8, 1H, C<sub>2</sub>**H**), 7.04–6.95 (m, 1H, C<sub>7</sub>**H**), 7.04–6.95 (m, 1H, C<sub>6</sub>**H**), 6.83 (d, *J* = 7.3, 1H, C<sub>5</sub>**H**), 6.75 (d, *J* = 2.8, 1H, N<sub>1</sub>**H**), 6.62 (d, *J* = 8.0, 1H, C<sub>8</sub>**H**), 6.58 (app-t, *J* = 7.4, 1H, C<sub>6</sub>**H**), 5.65 (d, *J* = 2.8, 1H, C<sub>2</sub>**H**), 4.62 (app-t, *J* = 8.7, 1H, C<sub>11</sub>**H**), 4.28 (app-t, *J* = 4.9, 1H, C<sub>11</sub>**H**), 4.14 (q, *J* = 6.5, 1H, C<sub>15</sub>**H**), 4.06 (app-t, *J* = 7.8, 1H, C<sub>15</sub>**H**), 3.41–3.29 (m, 1H, C<sub>19</sub>**H**<sub>a</sub>), 3.30–3.18 (m, 1H, C<sub>19</sub>**H**<sub>b</sub>), 3.30–3.18 (m, 1H, C<sub>12</sub>**H**<sub>a</sub>), 3.14–3.00 (m,



|                                                                                   |                                                                                                                                                                                                                                                                                                                                                                                                                                                                                                                                                                                                                                                                                                                                                                                                                |
|-----------------------------------------------------------------------------------|----------------------------------------------------------------------------------------------------------------------------------------------------------------------------------------------------------------------------------------------------------------------------------------------------------------------------------------------------------------------------------------------------------------------------------------------------------------------------------------------------------------------------------------------------------------------------------------------------------------------------------------------------------------------------------------------------------------------------------------------------------------------------------------------------------------|
|                                                                                   | 1H, C <sub>12</sub> H <sub>a</sub> ), 3.14–3.00 (m, 1H, C <sub>12</sub> H <sub>b</sub> ), 2.41 (dd, <i>J</i> = 10.0, 13.6, 1H, C <sub>12</sub> H <sub>b</sub> ), 2.03–1.94 (m, 1H, C <sub>17</sub> H <sub>a</sub> ), 1.74–1.56 (m, 2H, C <sub>18</sub> H), 1.47–1.36 (m, 1H, C <sub>17</sub> H <sub>b</sub> ), 1.23 (d, <i>J</i> = 6.9, 3H, C <sub>17</sub> H).                                                                                                                                                                                                                                                                                                                                                                                                                                                |
| <sup>13</sup> C NMR (125.8 MHz, methanol- <i>d</i> <sub>4</sub> , 20 °C):         | δ 172.7 (C <sub>13</sub> ), 170.9 (C <sub>16</sub> ), 170.9 (C <sub>16</sub> ), 167.5 (C <sub>13</sub> '), 149.3 (C <sub>9</sub> ), 138.1 (C <sub>9</sub> '), 137.3 (C <sub>7</sub> '), 136.1 (C <sub>4</sub> ), 129.6 (C <sub>7</sub> '), 127.8 (C <sub>4</sub> '), 126.6 (C <sub>2</sub> '), 125.1 (C <sub>5</sub> '), 120.6 (C <sub>6</sub> '), 120.5 (C <sub>5</sub> '), 119.7 (C <sub>6</sub> '), 111.2 (C <sub>8</sub> '), 110.4 (C <sub>8</sub> '), 109.7 (C <sub>3</sub> '), 87.3 (C <sub>2</sub> '), 61.4 (C <sub>3</sub> '), 60.5 (C <sub>11</sub> '), 60.2 (C <sub>15</sub> '), 57.4 (C <sub>11</sub> '), 52.4 (C <sub>15</sub> '), 46.1 (C <sub>19</sub> '), 39.9 (C <sub>12</sub> '), 29.3 (C <sub>17</sub> '), 29.3 (C <sub>12</sub> '), 22.7 (C <sub>18</sub> '), 15.4 (C <sub>17</sub> ).      |
| <sup>13</sup> C NMR (125.8 MHz, DMSO- <i>d</i> <sub>6</sub> , 20 °C):             | δ 170.0 (C <sub>13</sub> '), 169.1 (C <sub>16</sub> '), 168.6 (C <sub>16</sub> '), 165.5 (C <sub>13</sub> '), 148.1 (C <sub>9</sub> '), 135.9 (C <sub>9</sub> '), 135.7 (C <sub>7</sub> '), 134.4 (C <sub>4</sub> '), 127.9 (C <sub>7</sub> '), 126.1 (C <sub>4</sub> '), 125.0 (C <sub>2</sub> '), 123.6 (C <sub>5</sub> '), 119.2 (C <sub>5</sub> '), 118.0 (C <sub>6</sub> '), 117.8 (C <sub>6</sub> '), 109.3 (C <sub>8</sub> '), 109.2 (C <sub>8</sub> '), 109.1 (C <sub>3</sub> '), 85.0 (C <sub>2</sub> '), 59.3 (C <sub>3</sub> '), 58.5 (C <sub>15</sub> '), 58.4 (C <sub>11</sub> '), 55.2 (C <sub>11</sub> '), 50.4 (C <sub>15</sub> '), 44.6 (C <sub>19</sub> '), 38.8 (C <sub>12</sub> '), 27.7 (C <sub>17</sub> '), 25.7 (C <sub>12</sub> '), 21.9 (C <sub>18</sub> '), 14.8 (C <sub>17</sub> ). |
| FTIR (thin film) cm <sup>-1</sup> :                                               | 3584 (s), 3272 (br, s), 2924 (w), 1667 (s), 1453 (w), 1412 (m), 1346 (w), 1307 (w).                                                                                                                                                                                                                                                                                                                                                                                                                                                                                                                                                                                                                                                                                                                            |
| UV (CH <sub>3</sub> OH) λ <sub>max</sub> (log ε):                                 | 229 (4.67), 285 (3.91).                                                                                                                                                                                                                                                                                                                                                                                                                                                                                                                                                                                                                                                                                                                                                                                        |
| HRMS (DART) ( <i>m/z</i> ):                                                       | calc'd for C <sub>30</sub> H <sub>31</sub> N <sub>6</sub> O <sub>4</sub> [M+H] <sup>+</sup> : 539.2401, found: 539.2392.                                                                                                                                                                                                                                                                                                                                                                                                                                                                                                                                                                                                                                                                                       |
| [α] <sub>D</sub> <sup>24</sup> :                                                  | +123 ( <i>c</i> = 0.12, CH <sub>3</sub> OH). <sup>9</sup>                                                                                                                                                                                                                                                                                                                                                                                                                                                                                                                                                                                                                                                                                                                                                      |
| TLC (5% methanol, 47.5% tetrahydrofuran, 47.5% dichloromethane), R <sub>f</sub> : | 0.15 (UV, CAM).                                                                                                                                                                                                                                                                                                                                                                                                                                                                                                                                                                                                                                                                                                                                                                                                |

<sup>9</sup> Literature value: [α]<sub>D</sub><sup>23</sup> = +139 (*c* 0.10, CH<sub>3</sub>OH), see Raju, R.; Piggott, A. M.; Conte, M.; Aalbersberg, W. G. L.; Feussner, K.; Capon, R. J. *Org. Lett.* **2009**, *11*, 3862.

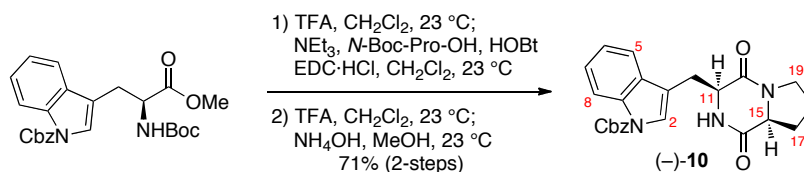

### **Proline diketopiperazine (-)-**10**:**

Trifluoroacetic acid (30 mL) was added via syringe to a solution of *N*<sup>α</sup>-Boc-*N*<sup>in</sup>-Cbz-L-tryptophan methyl ester<sup>8</sup> (7.10 g, 15.7 mmol, 1 equiv) in dichloromethane (100 mL) at 23 °C. After 1 h, the brown solution was concentrated under reduced pressure to afford a viscous brown residue, which was dissolved in dichloromethane (160 mL) and cooled to 0 °C in an ice-water bath. Triethylamine (9.85 mL, 70.7 mmol, 4.50 equiv) was added dropwise via syringe. *N*-hydroxybenzotriazole (3.18 g, 23.6 mmol, 1.50 equiv) and *N*<sup>α</sup>-Boc-L-proline (6.76 g, 31.4 mmol, 2.00 equiv) were sequentially added to the solution. After 2 min, upon dissolution of the *N*<sup>α</sup>-Boc-L-proline, 1-ethyl-3-(3-dimethylaminopropyl) carbodiimide hydrogen chloride (4.51 g, 23.6 mmol, 1.50 equiv) was added and the reaction mixture was allowed to warm to 23 °C. After 1 h and 45 min, another portion of 1-ethyl-3-(3-dimethylaminopropyl) carbodiimide hydrogen chloride (1.50 g, 7.85 mmol, 0.500 equiv) was added. After 1.5 h, aqueous hydrogen chloride solution (1 N, 500 mL) was added and the aqueous layer was extracted with dichloromethane (2 × 50 mL). The combined organic layers were washed with saturated aqueous sodium bicarbonate solution (500 mL) and the resulting aqueous layer was extracted with dichloromethane (2 × 50 mL). The combined organic layers were dried over anhydrous sodium sulfate, were filtered, and were concentrated under reduced pressure. The resulting off-white foam was then dissolved in dichloromethane (100 mL) and trifluoroacetic acid (30 mL) was added dropwise to the solution at 23 °C. After 1 h, the solution was concentrated under reduced pressure. The viscous residue was dissolved in methanol (400 mL) and cooled to 0 °C. Ammonium hydroxide (28–30% ammonia, 15 mL) was added dropwise and the reaction mixture was allowed to warm to 23 °C. After 14 h, another portion of ammonium hydroxide (28–30% ammonia, 10 mL) was added dropwise via syringe. After 23 h, the reaction mixture was cooled to –78 °C and filtered. The white precipitate was washed with methanol (2 × 50 mL), which had been cooled to 0 °C in an ice-water bath, and was dried under reduced pressure to afford diketopiperazine (-)-**10** (4.63 g, 70.6%, 2-steps) as a fine white powder. Structural assignments were made using additional information from gCOSY, HSQC, and HMBC experiments.

<sup>1</sup>H NMR (500 MHz, DMSO-*d*<sub>6</sub>, 20 °C):

δ 8.11 (s, 1H, N<sub>10</sub>H), 8.07 (d, *J* = 8.0, 1H, C<sub>8</sub>H), 7.67 (d, *J* = 7.7, 2H, C<sub>5</sub>H), 7.60 (s, 1H, C<sub>2</sub>H), 7.52 (d, *J* = 7.7, 1H, Ph<sub>Cbz-*o*</sub>-H), 7.46–7.37 (m, 3H, Ph<sub>Cbz</sub>-H), 7.33 (app-dt, *J* = 0.9, 7.7, 1H, C<sub>7</sub>H), 7.27 (app-dt, *J* = 0.9, 7.5, 1H, C<sub>6</sub>H), 5.46 (s, 2H, Ph<sub>Cbz</sub>CH<sub>2</sub>), 4.42 (app-t, *J* = 5.2, 1H, C<sub>11</sub>H), 4.12 (app-t, *J* = 8.2, 1H, C<sub>15</sub>H), 3.40–3.26 (m, 2H, C<sub>19</sub>H), 3.22 (dd, *J* = 4.2, 15.3, 1H, C<sub>12</sub>H<sub>a</sub>), 3.05 (dd, *J* = 5.6, 15.3, 1H, C<sub>12</sub>H<sub>b</sub>), 2.09–1.99 (m, 1H, C<sub>17</sub>H<sub>a</sub>), 1.78–1.62 (m, 2H, C<sub>18</sub>H), 1.62–1.48 (m, 1H, C<sub>17</sub>H<sub>b</sub>).

<sup>13</sup>C NMR (125.8 MHz, DMSO-*d*<sub>6</sub>, 20 °C):

δ 169.3 (C<sub>16</sub>), 165.2 (C<sub>13</sub>), 150.1 (C<sub>Cbz</sub>=O), 135.4 (Ph<sub>Cbz-*ipso*</sub>-C), 134.6 (C<sub>9</sub>), 130.4 (C<sub>4</sub>), 128.6 (Ph<sub>Cbz</sub>-C), 128.5 (Ph<sub>Cbz</sub>-C), 128.3 (Ph<sub>Cbz</sub>-C), 124.5 (C<sub>7</sub>), 124.0 (C<sub>2</sub>), 122.7 (C<sub>6</sub>), 119.7 (C<sub>5</sub>), 116.9

|                                                        |                                                                                                                                                                                                                                              |
|--------------------------------------------------------|----------------------------------------------------------------------------------------------------------------------------------------------------------------------------------------------------------------------------------------------|
|                                                        | (C <sub>3</sub> ), 114.5 (C <sub>8</sub> ), 68.2 (Ph <sub>Cbz</sub> CH <sub>2</sub> ), 58.5 (C <sub>15</sub> ), 54.3 (C <sub>11</sub> ), 44.7 (C <sub>19</sub> ), 27.8 (C <sub>17</sub> ), 24.9 (C <sub>12</sub> ), 22.0 (C <sub>18</sub> ). |
| FTIR (thin film) cm <sup>-1</sup> :                    | 3233 (br, m), 1732 (s), 1667 (s), 1455 (m), 1399 (m), 1249 (m).                                                                                                                                                                              |
| HRMS (DART) ( <i>m/z</i> ):                            | calc'd for C <sub>24</sub> H <sub>24</sub> N <sub>3</sub> O <sub>4</sub> [M+H] <sup>+</sup> : 418.1761,<br>found: 418.1764.                                                                                                                  |
| [α] <sub>D</sub> <sup>24</sup> :                       | -49 ( <i>c</i> = 0.23, DMSO).                                                                                                                                                                                                                |
| TLC (40% acetone in dichloromethane), R <sub>f</sub> : | 0.45 (UV, CAM).                                                                                                                                                                                                                              |

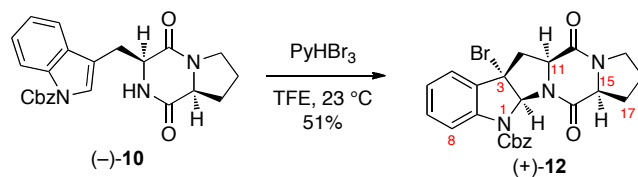

### **Tetracyclic bromide B (+)-12:**

Pyridinium tribromide (461 mg, 1.44 mmol, 1.20 equiv) was added to a suspension of diketopiperazine ( $-$ )-**10** (500 mg, 1.20 mmol, 1 equiv) in 2,2,2-trifluoroethanol (10 mL) at 23 °C. After 1 h, the reaction mixture was poured into a saturated aqueous sodium thiosulfate solution (60 mL) and extracted with dichloromethane (60 mL). The resulting aqueous layer was further extracted with dichloromethane (2  $\times$  30 mL) and the combined organic layers were dried over anhydrous sodium sulfate, were filtered, and were concentrated under reduced pressure. The crude reaction mixture was purified by flash column chromatography on silica gel (eluent: 75% ethyl acetate in hexanes) to afford tetracyclic bromide (+)-**12** (304 mg, 51.1%) as a beige foam. Structural assignments were made using additional information from gCOSY, HSQC, and HMBC experiments.

$^1\text{H}$  NMR (500 MHz,  $\text{CDCl}_3$ , 20 °C):

$\delta$  7.64 (d,  $J = 8.2$ , 1H,  $\text{C}_8\text{H}$ ), 7.48–7.39 (m, 1H,  $\text{C}_5\text{H}$ ), 7.48–7.39 (m, 2H,  $\text{Ph}_{\text{Cbz-}o}\text{-H}$ ), 7.34 (app-t,  $J = 7.0$ , 2H,  $\text{Ph}_{\text{Cbz-}m}\text{-H}$ ), 7.29 (t,  $J = 7.3$ , 1H,  $\text{Ph}_{\text{Cbz-}p}\text{-H}$ ), 7.23 (app-t,  $J = 7.6$ , 1H,  $\text{C}_7\text{H}$ ), 7.07 (app-t,  $J = 7.3$ , 1H,  $\text{C}_6\text{H}$ ), 6.29 (s, 1H,  $\text{C}_2\text{H}$ ), 5.41 (d,  $J = 12.2$ , 1H,  $\text{Ph}_{\text{Cbz}}\text{CH}_a$ ), 5.30 (d,  $J = 12.2$ , 1H,  $\text{Ph}_{\text{Cbz}}\text{CH}_b$ ), 4.35 (dd,  $J = 3.4$ , 14.3, 1H,  $\text{C}_{12}\text{H}_a$ ), 4.00 (app-t,  $J = 7.9$ , 1H,  $\text{C}_{15}\text{H}$ ), 3.78 (dd,  $J = 3.4$ , 14.3, 1H,  $\text{C}_{12}\text{H}_b$ ), 3.37–3.27 (m, 1H,  $\text{C}_{19}\text{H}_a$ ), 3.18–3.07 (m, 1H,  $\text{C}_{19}\text{H}_b$ ), 3.03 (dd,  $J = 10.1$ , 14.0, 1H,  $\text{C}_{12}\text{H}_b$ ), 2.21–2.09 (m, 1H,  $\text{C}_{17}\text{H}_a$ ), 2.09–1.96 (m, 1H,  $\text{C}_{17}\text{H}_b$ ), 1.80–1.68 (m, 2H,  $\text{C}_{18}\text{H}$ ).

$^{13}\text{C}$  NMR (125.8 MHz,  $\text{CDCl}_3$ , 20 °C):

$\delta$  167.2 ( $\text{C}_{13}$ ), 164.3 ( $\text{C}_{16}$ ), 152.8 ( $\text{C}_{\text{Cbz=O}}$ ), 139.4 ( $\text{C}_9$ ), 135.8 ( $\text{Ph}_{\text{Cbz-}ipso}\text{-C}$ ), 132.7 ( $\text{C}_4$ ), 130.8 ( $\text{C}_7$ ), 128.6 ( $\text{Ph}_{\text{Cbz-}C}$ ), 128.3 ( $\text{Ph}_{\text{Cbz-}C}$ ), 128.2 ( $\text{Ph}_{\text{Cbz-}C}$ ), 124.9 ( $\text{C}_5$ ), 124.7 ( $\text{C}_6$ ), 116.6 ( $\text{C}_8$ ), 84.6 ( $\text{C}_2$ ), 68.3 ( $\text{Ph}_{\text{Cbz}}\text{CH}_2$ ), 60.6 ( $\text{C}_3$ ), 60.5 ( $\text{C}_{15}$ ), 59.2 ( $\text{C}_{11}$ ), 45.1 ( $\text{C}_{19}$ ), 37.5 ( $\text{C}_{12}$ ), 27.3 ( $\text{C}_{17}$ ), 23.3 ( $\text{C}_{18}$ ).

FTIR (thin film)  $\text{cm}^{-1}$ :

1722 (s), 1679 (s), 1479 (m), 1410 (m), 751 (m).

HRMS (ESI) ( $m/z$ ):

calc'd for  $\text{C}_{24}\text{H}_{23}\text{BrN}_3\text{O}_4$  [ $\text{M}+\text{H}$ ] $^+$ : 496.0866,  
found: 496.0877.

$[\alpha]_D^{23}$ :

+63 ( $c = 0.11$ ,  $\text{CHCl}_3$ ).

TLC (75% ethyl acetate in hexanes),  $R_f$ :

0.18 (UV, CAM).

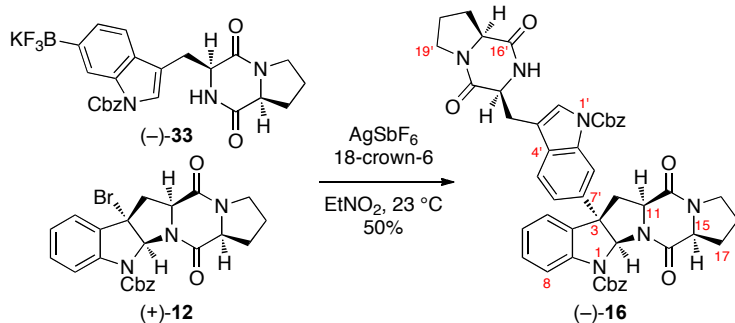

**(-)-*N*<sup>in</sup>,*N*<sup>ini</sup>-Dicarboxybenzyl Nasesezine B (16):**

Silver(I) hexafluoroantimonate (69.2 mg, 202 μmol, 5.00 equiv) was added as a solid to a solution of tetracyclic bromide (+)-12 (20.0 mg, 40.3 μmol, 1 equiv), potassium 6-trifluoroborateindole (-)-33 (31.6 mg, 60.4 μmol, 1.50 equiv), and 18-crown-6 (53.3 mg, 202 μmol, 5.00 equiv) in nitroethane (2 mL) at 23 °C. After 1 h, aqueous hydrogen chloride (2 N, 2 mL) was added. After stirring for 5 min, the reaction mixture was diluted with ethyl acetate (60 mL) and washed with brine (3 × 60 mL). The organic layer was dried over anhydrous sodium sulfate, was filtered, and was concentrated under reduced pressure. The crude reaction mixture was purified by flash column chromatography on silica gel (eluent: gradient, 5% methanol in ethyl acetate→5% methanol in dichloromethane) to afford (-)-*N*<sup>in</sup>,*N*<sup>ini</sup>-dicarboxybenzyl nasesezine B (16) (16.7 mg, 49.8%) as a white solid. Structural assignments were made using additional information from gCOSY, HSQC, and HMBC experiments.

<sup>1</sup>H NMR (500 MHz, CDCl<sub>3</sub>, 20 °C):

δ 8.14 (br-s, 1H, C<sub>8</sub>H), 7.66 (d, *J* = 8.0, 1H, C<sub>8</sub>H), 7.49 (s, 1H, C<sub>2</sub>H), 7.46–7.32 (m, 1H, C<sub>5</sub>H), 7.46–7.32 (m, 7H, Ph<sub>Cbz</sub>-H), 7.32–7.25 (m, 1H, C<sub>5</sub>H), 7.32–7.25 (m, 3H, Ph<sub>Cbz</sub>-H), 7.18 (app-t, *J* = 7.5, 1H, C<sub>7</sub>H), 7.07–6.97 (m, 1H, C<sub>6</sub>H), 7.07–6.97 (m, 1H, C<sub>6</sub>H), 6.38 (s, 1H, C<sub>2</sub>H), 5.82 (s, 1H, N<sub>10</sub>H), 5.41–5.22 (m, 4H, Ph<sub>Cbz</sub>CH<sub>2</sub>), 4.37 (d, *J* = 7.1, 1H, C<sub>11</sub>H), 4.26 (dd, *J* = 2.3, 10.2, 1H, C<sub>11</sub>H), 4.04 (app-t, *J* = 8.0, 1H, C<sub>15</sub>H), 4.00 (app-t, *J* = 7.9, 1H, C<sub>15</sub>H), 3.65–3.47 (m, 2H, C<sub>19</sub>H), 3.65–3.47 (m, 1H, C<sub>12</sub>H<sub>a</sub>), 3.65–3.47 (m, 1H, C<sub>12</sub>H<sub>a</sub>), 3.41–3.31 (m, 1H, C<sub>19</sub>H<sub>a</sub>), 3.20–3.10 (m, 1H, C<sub>19</sub>H<sub>b</sub>), 2.91–2.78 (m, 1H, C<sub>12</sub>H<sub>b</sub>), 2.91–2.78 (m, 1H, C<sub>12</sub>H<sub>b</sub>), 2.30–2.23 (m, 1H, C<sub>17</sub>H<sub>a</sub>), 2.23–2.15 (m, 1H, C<sub>17</sub>H<sub>a</sub>), 2.14–2.04 (m, 1H, C<sub>17</sub>H<sub>b</sub>), 2.03–1.90 (m, 1H, C<sub>17</sub>H<sub>b</sub>), 2.03–1.90 (m, 1H, C<sub>18</sub>H<sub>a</sub>), 1.90–1.66 (m, 2H, C<sub>18</sub>H), 1.90–1.66 (m, 1H, C<sub>18</sub>H<sub>b</sub>).

<sup>13</sup>C NMR (125.8 MHz, CDCl<sub>3</sub>, 20 °C):

δ 169.5 (C<sub>16</sub>), 167.9 (C<sub>16</sub>), 165.5 (C<sub>13</sub>), 165.1 (C<sub>13</sub>), 153.2 (C<sub>Cbz</sub>=O), 150.5 (C<sub>Cbz</sub>=O), 139.8 (C<sub>9</sub>), 139.5 (C<sub>7</sub>), 136.4 (Ph<sub>Cbz</sub>-*ipso*-C), 135.0 (Ph<sub>Cbz</sub>-*ipso*-C), 135.0 (C<sub>4</sub>), 135.0 (C<sub>9</sub>), 129.1 (C<sub>7</sub>), 129.1 (C<sub>4</sub>), 129.1 (Ph<sub>Cbz</sub>-C), 129.0 (Ph<sub>Cbz</sub>-C), 129.0 (Ph<sub>Cbz</sub>-C), 128.6 (Ph<sub>Cbz</sub>-C), 128.3 (Ph<sub>Cbz</sub>-C), 128.2 (Ph<sub>Cbz</sub>-C), 125.5 (C<sub>5</sub>), 124.9 (C<sub>2</sub>), 124.4 (C<sub>6</sub>), 121.4 (C<sub>6</sub>),

|                                                      |                                                                                                                                                                                                                                                                                                                                                                                                                                                                                                                                                                          |
|------------------------------------------------------|--------------------------------------------------------------------------------------------------------------------------------------------------------------------------------------------------------------------------------------------------------------------------------------------------------------------------------------------------------------------------------------------------------------------------------------------------------------------------------------------------------------------------------------------------------------------------|
|                                                      | 119.5 (C <sub>5'</sub> ), 116.8 (C <sub>8</sub> ), 115.8 (C <sub>3'</sub> ), 113.3 (C <sub>8'</sub> ),<br>83.6 (C <sub>2</sub> ), 69.3 (Ph <sub>Cbz</sub> CH <sub>2</sub> ), 68.2 (Ph <sub>Cbz</sub> CH <sub>2</sub> ), 61.1<br>(C <sub>15</sub> ), 59.7 (C <sub>11</sub> ), 59.4 (C <sub>15'</sub> ), 59.2 (C <sub>3</sub> ), 54.2 (C <sub>11'</sub> ),<br>45.7 (C <sub>19'</sub> ), 45.2 (C <sub>19</sub> ), 35.4 (C <sub>12</sub> ), 28.5 (C <sub>17'</sub> ), 27.6<br>(C <sub>17</sub> ), 26.6 (C <sub>12</sub> ), 23.6 (C <sub>18</sub> ), 22.8 (C <sub>18</sub> ). |
| FTIR (thin film) cm <sup>-1</sup> :                  | 1721 (s), 1679 (s), 1399 (s), 1249 (m), 751 (m).                                                                                                                                                                                                                                                                                                                                                                                                                                                                                                                         |
| HRMS (ESI) ( <i>m/z</i> ):                           | calc'd for C <sub>48</sub> H <sub>45</sub> N <sub>6</sub> O <sub>8</sub> [M+H] <sup>+</sup> : 833.3293,<br>found: 833.3283.                                                                                                                                                                                                                                                                                                                                                                                                                                              |
| [α] <sub>D</sub> <sup>25</sup> :                     | -40 ( <i>c</i> = 0.18, CHCl <sub>3</sub> ).                                                                                                                                                                                                                                                                                                                                                                                                                                                                                                                              |
| TLC (5% methanol in ethyl acetate), R <sub>f</sub> : | 0.09 (UV, CAM).                                                                                                                                                                                                                                                                                                                                                                                                                                                                                                                                                          |

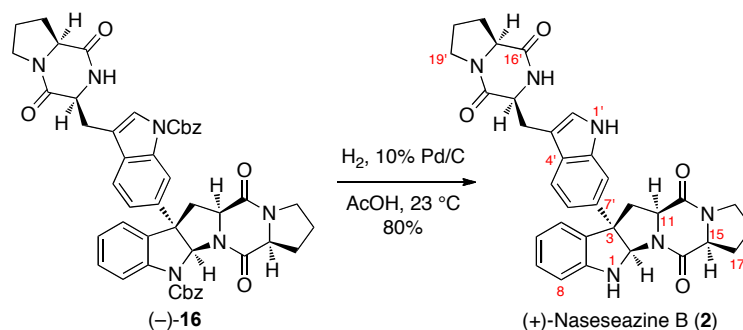

### **(+)-Nasesezine B (2):**

Palladium on charcoal (10% w/w, 2.1 mg, 1.98  $\mu\text{mol}$ , 0.25 equiv) was added to a solution of dicarboxybenzyl nasesezine B (-)-(**16**) (6.6 mg, 7.92  $\mu\text{mol}$ , 1 equiv) in acetic acid (1 mL) at 23  $^{\circ}\text{C}$ . A stream of hydrogen gas was passed through the solution for 2 min by discharge of a balloon equipped with a needle extending into the reaction mixture. After stirring the solution for 3.5 h under an atmosphere of hydrogen gas, the solution was filtered over Celite. The solids were further extracted with methanol and the combined filtrates were concentrated under reduced pressure. The crude reaction mixture was purified by flash column chromatography on silica gel (eluent: 5% methanol, 45% tetrahydrofuran, 50% dichloromethane) to afford (+)-nasesezine B (**2**) (3.6 mg, 80%) as a white solid. Structural assignments were made using additional information from gCOSY, HSQC, HMBC, and ROESY experiments.

$^1\text{H}$  NMR (500 MHz, methanol- $d_4$ , 20  $^{\circ}\text{C}$ ):

$\delta$  7.57 (d,  $J = 7.4$ , 1H, C<sub>5</sub>H), 7.41 (d,  $J = 1.3$ , 1H, C<sub>8</sub>H), 7.12 (s, 1H, C<sub>2</sub>H), 7.06 (app-dt,  $J = 1.2$ , 7.9, 1H, C<sub>7</sub>H), 7.01 (dd,  $J = 1.6$ , 8.5, 1H, C<sub>6</sub>H), 6.83 (d,  $J = 7.2$ , 1H, C<sub>5</sub>H), 6.69 (d,  $J = 7.7$ , 1H, C<sub>8</sub>H), 6.68 (app-t,  $J = 7.3$ , 1H, C<sub>6</sub>H), 5.84 (s, 1H, C<sub>2</sub>H), 4.71 (app-t,  $J = 8.6$ , 1H, C<sub>11</sub>H), 4.39 (app-t,  $J = 4.6$ , 1H, C<sub>11</sub>H), 4.29 (app-t,  $J = 7.7$ , 1H, C<sub>15</sub>H), 3.98 (ddd,  $J = 1.4$ , 6.3, 10.7, 1H, C<sub>15</sub>H), 3.52–3.37 (m, 2H, C<sub>19</sub>H), 3.52–3.37 (m, 1H, C<sub>19</sub>H<sub>a</sub>), 3.35–3.21 (m, 2H, C<sub>12</sub>H), 3.35–3.21 (m, 1H, C<sub>12</sub>H<sub>a</sub>), 3.35–3.21 (m, 1H, C<sub>19</sub>H<sub>b</sub>), 2.57 (dd,  $J = 10.2$ , 13.7, 1H, C<sub>12</sub>H<sub>b</sub>), 2.30–2.22 (m, 1H, C<sub>17</sub>H<sub>a</sub>), 2.15–2.04 (m, 1H, C<sub>17</sub>H<sub>b</sub>), 2.04–1.87 (m, 2H, C<sub>18</sub>H), 2.04–1.87 (m, 1H, C<sub>17</sub>H<sub>a</sub>), 1.73–1.60 (m, 1H, C<sub>18</sub>H<sub>a</sub>), 1.49–1.40 (m, 1H, C<sub>18</sub>H<sub>b</sub>), 0.97–0.87 (m, 1H, C<sub>17</sub>H<sub>b</sub>).

$^1\text{H}$  NMR (500 MHz, DMSO- $d_6$ , 20  $^{\circ}\text{C}$ ):

$\delta$  10.81 (s, 1H, N<sub>1</sub>H), 7.71 (s, 1H, N<sub>10</sub>H), 7.57 (d,  $J = 8.4$ , 1H, C<sub>5</sub>H), 7.30 (d,  $J = 1.3$ , 1H, C<sub>8</sub>H), 7.19 (d,  $J = 2.2$ , 1H, C<sub>2</sub>H), 7.00 (app-dt,  $J = 1.3$ , 7.9, 1H, C<sub>7</sub>H), 6.99 (d,  $J = 8.6$ , 1H, C<sub>6</sub>H), 6.82–6.76 (m, 1H, C<sub>5</sub>H), 6.82–6.76 (m, 1H, N<sub>1</sub>H), 6.60 (d,  $J = 7.6$ , 1H, C<sub>8</sub>H), 6.58 (app-dt,  $J = 1.0$ , 7.5, 1H, C<sub>6</sub>H), 5.68 (d,  $J = 3.2$ , 1H, C<sub>2</sub>H), 4.72 (app-t,  $J = 8.2$ , 1H, C<sub>11</sub>H), 4.35 (app-t,  $J = 7.9$ , 1H, C<sub>15</sub>H), 4.29 (app-t,  $J = 5.1$ , 1H, C<sub>11</sub>H), 4.06 (app-t,  $J = 8.7$ , 1H, C<sub>15</sub>H), 3.41–3.30 (m, 2H, C<sub>19</sub>H), 3.41–

|                                                                               |                                                                                                                                                                                                                                                                                                                                                                                                                                                                                                                                                                                                                                                                                                                                                                                                                                     |
|-------------------------------------------------------------------------------|-------------------------------------------------------------------------------------------------------------------------------------------------------------------------------------------------------------------------------------------------------------------------------------------------------------------------------------------------------------------------------------------------------------------------------------------------------------------------------------------------------------------------------------------------------------------------------------------------------------------------------------------------------------------------------------------------------------------------------------------------------------------------------------------------------------------------------------|
|                                                                               | 3.30 (m, 1H, C <sub>19</sub> H <sub>a</sub> ), 3.29–3.24 (m, 1H, C <sub>19</sub> H <sub>b</sub> ), 3.22 (dd, <i>J</i> = 4.6, 14.6, 1H, C <sub>12</sub> H <sub>a</sub> ), 3.13 (dd, <i>J</i> = 7.4, 13.6, 1H, C <sub>12</sub> H <sub>a</sub> ), 3.05 (dd, <i>J</i> = 5.8, 14.8, 1H, C <sub>12</sub> H <sub>b</sub> ), 2.36 (dd, <i>J</i> = 10.5, 13.6, 1H, C <sub>12</sub> H <sub>b</sub> ), 2.21–2.11 (m, 1H, C <sub>17</sub> H <sub>a</sub> ), 2.03–1.91 (m, 1H, C <sub>17</sub> H <sub>a</sub> ), 2.03–1.91 (m, 1H, C <sub>17</sub> H <sub>b</sub> ), 1.91–1.77 (m, 2H, C <sub>18</sub> H), 1.75–1.56 (m, 2H, C <sub>18</sub> H), 1.48–1.36 (m, 1H, C <sub>17</sub> H <sub>b</sub> ).                                                                                                                                             |
| <sup>13</sup> C NMR (125.8 MHz, methanol- <i>d</i> <sub>4</sub> , 20 °C):     | δ 170.9 (C <sub>16</sub> ), 170.3 (C <sub>16</sub> ), 168.6 (C <sub>13</sub> ), 167.5 (C <sub>13</sub> ), 149.3 (C <sub>9</sub> ), 138.1 (C <sub>9</sub> ), 137.2 (C <sub>7</sub> ), 136.2 (C <sub>4</sub> ), 129.6 (C <sub>7</sub> ), 127.8 (C <sub>4</sub> ), 126.6 (C <sub>2</sub> ), 125.1 (C <sub>5</sub> ), 120.6 (C <sub>6</sub> ), 120.6 (C <sub>5</sub> ), 119.8 (C <sub>6</sub> ), 111.3 (C <sub>8</sub> ), 110.5 (C <sub>8</sub> ), 109.8 (C <sub>3</sub> ), 87.1 (C <sub>2</sub> ), 61.9 (C <sub>15</sub> ), 61.9 (C <sub>3</sub> ), 61.7 (C <sub>11</sub> ), 60.2 (C <sub>15</sub> ), 57.3 (C <sub>11</sub> ), 46.4 (C <sub>19</sub> ), 46.1 (C <sub>19</sub> ), 39.7 (C <sub>12</sub> ), 29.3 (C <sub>17</sub> ), 29.3 (C <sub>12</sub> ), 28.6 (C <sub>17</sub> ), 24.4 (C <sub>18</sub> ), 22.7 (C <sub>18</sub> ). |
| <sup>13</sup> C NMR (125.8 MHz, DMSO- <i>d</i> <sub>6</sub> , 20 °C):         | δ 169.1 (C <sub>16</sub> ), 167.9 (C <sub>16</sub> ), 165.9 (C <sub>13</sub> ), 165.5 (C <sub>13</sub> ), 148.1 (C <sub>9</sub> ), 135.9 (C <sub>9</sub> ), 135.6 (C <sub>7</sub> ), 134.6 (C <sub>4</sub> ), 127.9 (C <sub>7</sub> ), 126.1 (C <sub>4</sub> ), 125.0 (C <sub>2</sub> ), 123.4 (C <sub>5</sub> ), 119.1 (C <sub>5</sub> ), 117.9 (C <sub>6</sub> ), 117.8 (C <sub>6</sub> ), 109.2 (C <sub>8</sub> ), 109.2 (C <sub>8</sub> ), 109.2 (C <sub>3</sub> ), 84.8 (C <sub>2</sub> ), 59.9 (C <sub>15</sub> ), 59.8 (C <sub>3</sub> ), 59.5 (C <sub>11</sub> ), 58.4 (C <sub>15</sub> ), 55.2 (C <sub>11</sub> ), 44.6 (C <sub>19</sub> ), 44.6 (C <sub>19</sub> ), 38.7 (C <sub>12</sub> ), 27.6 (C <sub>17</sub> ), 27.0 (C <sub>17</sub> ), 25.6 (C <sub>12</sub> ), 22.9 (C <sub>18</sub> ), 21.9 (C <sub>18</sub> ). |
| FTIR (thin film) cm <sup>-1</sup> :                                           | 3295 (br, s), 2954 (w), 2882 (w), 1661 (s), 1426 (m), 1343 (w), 1312 (w), 1245 (w), 750 (m).                                                                                                                                                                                                                                                                                                                                                                                                                                                                                                                                                                                                                                                                                                                                        |
| UV (CH <sub>3</sub> OH) λ <sub>max</sub> (log ε):                             | 201 (4.95), 203 (4.98), 204 (4.92), 229 (4.67), 285 (3.92).                                                                                                                                                                                                                                                                                                                                                                                                                                                                                                                                                                                                                                                                                                                                                                         |
| HRMS (DART) ( <i>m/z</i> ):                                                   | calc'd for C <sub>32</sub> H <sub>33</sub> N <sub>6</sub> O <sub>4</sub> [M+H] <sup>+</sup> : 565.2558, found: 565.2546.                                                                                                                                                                                                                                                                                                                                                                                                                                                                                                                                                                                                                                                                                                            |
| [α] <sub>D</sub> <sup>24</sup> :                                              | +101 ( <i>c</i> = 0.23, CH <sub>3</sub> OH). <sup>10</sup>                                                                                                                                                                                                                                                                                                                                                                                                                                                                                                                                                                                                                                                                                                                                                                          |
| TLC (5% methanol, 45% tetrahydrofuran, 50% dichloromethane), R <sub>f</sub> : | 0.19 (UV, CAM).                                                                                                                                                                                                                                                                                                                                                                                                                                                                                                                                                                                                                                                                                                                                                                                                                     |

<sup>10</sup> Literature value: [α]<sub>D</sub><sup>23</sup> = +95 (*c* 0.08, CH<sub>3</sub>OH), Raju, R.; Piggott, A. M.; Conte, M.; Aalbersberg, W. G. L.; Feussner, K.; Capon, R. *J. Org. Lett.* **2009**, *11*, 3862.



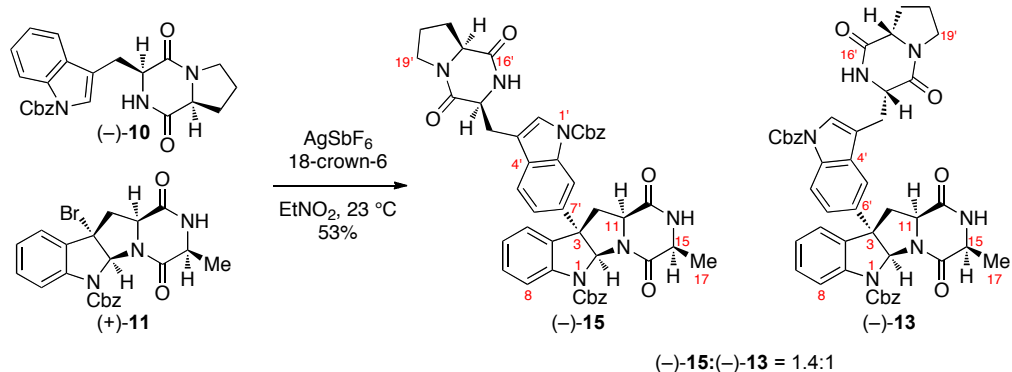

### (-)-*N*<sup>in</sup>,*N*<sup>ini</sup>-Dicarboxybenzyl *iso*-Naseeseazine A (**13**):

Silver(I) hexafluoroantimonate (73.0 mg, 213  $\mu\text{mol}$ , 5.00 equiv) was added as a solid to a solution of tetracyclic bromide (+)-**11** (20.0 mg, 42.5  $\mu\text{mol}$ , 1 equiv) and proline diketopiperazine (-)-**10** (26.6 mg, 63.8  $\mu\text{mol}$ , 1.50 equiv) in nitroethane (2 mL) at 23 °C. After 2 h, the reaction mixture was diluted with dichloromethane (60 mL) and washed with brine (60 mL). The resulting aqueous layer was extracted with dichloromethane (2  $\times$  30 mL) and the combined organic layers were dried over anhydrous sodium sulfate, were filtered, and were concentrated under reduced pressure. The crude reaction mixture was purified by flash column chromatography on silica gel (eluent: gradient, 5% methanol in ethyl acetate  $\rightarrow$  5% methanol in dichloromethane) to afford a regioisomeric mixture of (-)-*N*<sup>in</sup>,*N*<sup>ini</sup>-dicarboxybenzyl naseeseazine A (**15**) and (-)-*N*<sup>in</sup>,*N*<sup>ini</sup>-dicarboxybenzyl *iso*-naseeseazine A (**13**) (18.1 mg, 53%, (-)-**15**:(-)-**13**, 1.4:1) as a white solid.

Regioisomers (-)-**15** and (-)-**13** were separated for the purpose of full and independent characterization by preparative HPLC [Waters X-Bridge preparative HPLC column, C18, 5  $\mu\text{m}$ , 19  $\times$  250 mm; 20.0 mL/min; gradient, 55%  $\rightarrow$  65% acetonitrile in water, 15 min;  $t_R$ (-)-**15**) = 4.6 min,  $t_R$ (-)-**13**) = 5.7 min]. Structural assignments were made using additional information from gCOSY, HSQC, and HMBC experiments.

### (-)-*N*<sup>in</sup>,*N*<sup>ini</sup>-Dicarboxybenzyl *iso*-Naseeseazine A (**13**):

$^1\text{H}$  NMR (500 MHz,  $\text{CDCl}_3$ , 20 °C):

$\delta$  8.03 (s, 1H,  $\text{C}_3\text{H}$ ), 7.65 (d,  $J = 8.2$ , 1H,  $\text{C}_3\text{H}$ ), 7.49 (s, 1H,  $\text{C}_5\text{H}$ ), 7.43 (d,  $J = 7.8$ , 2H,  $\text{Ph}_{\text{Cbz-}o\text{-H}}$ ), 7.41–7.25 (m, 8H,  $\text{Ph}_{\text{Cbz-H}}$ ), 7.41–7.25 (m, 1H,  $\text{C}_2\text{H}$ ), 7.41–7.25 (m, 1H,  $\text{C}_5\text{H}$ ), 7.18 (app-dt,  $J = 1.1, 8.0$ , 1H,  $\text{C}_7\text{H}$ ), 7.13 (d,  $J = 8.9$ , 1H,  $\text{C}_7\text{H}$ ), 7.01 (app-dt,  $J = 0.8, 7.5$ , 1H,  $\text{C}_6\text{H}$ ), 6.42 (s, 1H,  $\text{C}_2\text{H}$ ), 5.85 (s, 1H,  $\text{N}_{10}\text{H}$ ), 5.81 (s, 1H,  $\text{N}_{14}\text{H}$ ), 5.40 (s, 2H,  $\text{Ph}_{\text{Cbz-CH}_2}$ ), 5.37 (d,  $J = 12.4$ , 1H,  $\text{Ph}_{\text{Cbz-CH}_a}$ ), 5.31 (d,  $J = 12.4$ , 1H,  $\text{Ph}_{\text{Cbz-CH}_b}$ ), 4.41 (dd,  $J = 3.5, 9.8$ , 1H,  $\text{C}_{11}\text{H}$ ), 4.23 (dd,  $J = 2.7, 9.4$ , 1H,  $\text{C}_{11}\text{H}$ ), 4.03–3.95 (m, 1H,  $\text{C}_{15}\text{H}$ ), 4.03–3.95 (m, 1H,  $\text{C}_{15}\text{H}$ ), 3.59–3.38 (m, 1H,  $\text{C}_{12}\text{H}_a$ ), 3.59–3.38 (m, 2H,  $\text{C}_{19}\text{H}$ ), 3.59–3.38 (m, 1H,  $\text{C}_{12}\text{H}_a$ ), 2.94 (dd,  $J = 10.0, 13.8$ , 1H,  $\text{C}_{12}\text{H}_b$ ), 2.84 (dd,  $J = 9.9, 15.3$ , 1H,  $\text{C}_{12}\text{H}_b$ ), 2.30–2.19 (m, 1H,  $\text{C}_{17}\text{H}_a$ ), 1.94–1.77 (m, 2H,  $\text{C}_{18}\text{H}$ ), 1.94–1.77 (m, 1H,  $\text{C}_{17}\text{H}_b$ ), 1.33 (d,  $J = 6.9$ , 3H,  $\text{C}_{17}\text{H}$ ).

|                                                           |                                                                                                                                                                                                                                                                                                                                                                                                                                                                                                                                                                                                                                                                                                                                                                                                                                                                                                                                                                                                                                                                                                                                                                                                                                                                                                                                                            |
|-----------------------------------------------------------|------------------------------------------------------------------------------------------------------------------------------------------------------------------------------------------------------------------------------------------------------------------------------------------------------------------------------------------------------------------------------------------------------------------------------------------------------------------------------------------------------------------------------------------------------------------------------------------------------------------------------------------------------------------------------------------------------------------------------------------------------------------------------------------------------------------------------------------------------------------------------------------------------------------------------------------------------------------------------------------------------------------------------------------------------------------------------------------------------------------------------------------------------------------------------------------------------------------------------------------------------------------------------------------------------------------------------------------------------------|
| $^{13}\text{C}$ NMR (125.8 MHz, $\text{CDCl}_3$ , 20 °C): | $\delta$ 169.5 ( $\text{C}_{16}$ ), 169.5 ( $\text{C}_{13}$ ), 167.8 ( $\text{C}_{16}$ ), 165.0 ( $\text{C}_{13}$ ), 153.3 ( $\text{C}_{\text{Cbz}}=\text{O}$ ), 150.5 ( $\text{C}_{\text{Cbz}}=\text{O}$ ), 139.7 ( $\text{C}_9$ ), 137.2 ( $\text{C}_6$ ), 136.3 ( $\text{C}_{\text{Cbz-}ipso}\text{-C}$ ), 135.4 ( $\text{C}_4$ ), 135.1 ( $\text{C}_{\text{Cbz-}ipso}\text{-C}$ ), 134.9 ( $\text{C}_9$ ), 130.2 ( $\text{C}_4$ ), 129.2 ( $\text{C}_7$ ), 129.1 ( $\text{Ph}_{\text{Cbz}}\text{-C}$ ), 129.0 ( $\text{Ph}_{\text{Cbz}}\text{-C}$ ), 128.8 ( $\text{Ph}_{\text{Cbz}}\text{-C}$ ), 128.7 ( $\text{Ph}_{\text{Cbz}}\text{-C}$ ), 128.3 ( $\text{Ph}_{\text{Cbz}}\text{-C}$ ), 128.3 ( $\text{Ph}_{\text{Cbz}}\text{-C}$ ), 125.3 ( $\text{C}_5$ ), 125.1 ( $\text{C}_5$ ), 124.5 ( $\text{C}_6$ ), 123.3 ( $\text{C}_7$ ), 117.1 ( $\text{C}_8$ ), 116.3 ( $\text{C}_8$ ), 116.0 ( $\text{C}_3$ ), 115.9 ( $\text{C}_2$ ), 83.6 ( $\text{C}_2$ ), 69.3 ( $\text{Ph}_{\text{Cbz}}\text{CH}_2$ ), 68.2 ( $\text{Ph}_{\text{Cbz}}\text{CH}_2$ ), 59.3 ( $\text{C}_{15}$ ), 58.6 ( $\text{C}_{11}$ ), 58.5 ( $\text{C}_3$ ), 54.2 ( $\text{C}_{11}$ ), 52.0 ( $\text{C}_{15}$ ), 45.6 ( $\text{C}_{19}$ ), 35.2 ( $\text{C}_{12}$ ), 28.4 ( $\text{C}_{17}$ ), 26.8 ( $\text{C}_{12}$ ), 22.7 ( $\text{C}_{18}$ ), 15.3 ( $\text{C}_{17}$ ). |
| FTIR (thin film) $\text{cm}^{-1}$ :                       | 3251 (br, m), 1720 (s), 1688 (s), 1401 (m), 1310 (m), 751 (m).                                                                                                                                                                                                                                                                                                                                                                                                                                                                                                                                                                                                                                                                                                                                                                                                                                                                                                                                                                                                                                                                                                                                                                                                                                                                                             |
| HRMS (ESI) ( $m/z$ ):                                     | calc'd for $\text{C}_{46}\text{H}_{43}\text{N}_6\text{O}_8$ $[\text{M}+\text{H}]^+$ : 807.3137<br>found: 807.3115.                                                                                                                                                                                                                                                                                                                                                                                                                                                                                                                                                                                                                                                                                                                                                                                                                                                                                                                                                                                                                                                                                                                                                                                                                                         |
| $[\alpha]_{\text{D}}^{24}$ :                              | -20 ( $c = 0.26$ , $\text{CHCl}_3$ ).                                                                                                                                                                                                                                                                                                                                                                                                                                                                                                                                                                                                                                                                                                                                                                                                                                                                                                                                                                                                                                                                                                                                                                                                                                                                                                                      |
| TLC (8% methanol in ethyl acetate), $R_f$ :               | 0.06 (UV, CAM).                                                                                                                                                                                                                                                                                                                                                                                                                                                                                                                                                                                                                                                                                                                                                                                                                                                                                                                                                                                                                                                                                                                                                                                                                                                                                                                                            |

**(-)- $N^{\text{in}}$ , $N^{\text{in}}$ -Dicarboxybenzyl Naseseazine A (15):**

Please see page S14 for the full characterization data for (-)- $N^{\text{in}}$ , $N^{\text{in}}$ -dicarboxybenzyl naseseazine A (15).

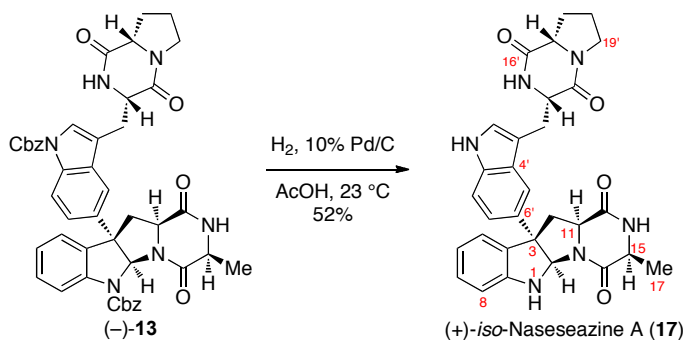

**(+)-*iso*-Naseseazine A (**17**):**

Palladium on charcoal (10% w/w, 6.0 mg, 5.67  $\mu\text{mol}$ , 0.25 equiv) was added to a solution of (–)-*N*<sup>in</sup>,*N*<sup>mi</sup>-dicarboxybenzyl *iso*-naseseazine A (**13**) (18.3 mg, 22.7  $\mu\text{mol}$ , 1 equiv) in acetic acid (1 mL) at 23 °C. A stream of hydrogen gas was passed through the solution for 2 min by discharge of a balloon equipped with a needle extending into the reaction mixture. After stirring the solution for 20 h under an atmosphere of hydrogen gas, the solution was filtered over Celite. The solids were further extracted with methanol and the combined filtrates were concentrated under reduced pressure. The crude reaction mixture was purified by flash column chromatography on silica gel (eluent: 7.5% methanol, 42.5% tetrahydrofuran, 50% dichloromethane) to afford (+)-*iso*-naseseazine A (**17**) (6.4 mg, 52.4%) as a white solid. Structural assignments were made using additional information from gCOSY, HSQC, and HMBC experiments.

<sup>1</sup>H NMR (500 MHz, methanol-*d*<sub>4</sub>, 20 °C):

$\delta$  7.71 (s, 1H, C<sub>5</sub>H), 7.32 (d, *J* = 8.6, 1H, C<sub>8</sub>H), 7.10 (s, 1H, C<sub>2</sub>H), 7.06 (app-dt, *J* = 1.0, 7.7, 1H, C<sub>7</sub>H), 7.01 (dd, *J* = 1.7, 8.6, 1H, C<sub>7</sub>H), 6.90 (d, *J* = 7.2, 1H, C<sub>5</sub>H), 6.72–6.65 (m, 1H, C<sub>8</sub>H), 6.72–6.65 (m, 1H, C<sub>6</sub>H), 5.87 (s, 1H, C<sub>2</sub>H), 4.97–4.78 (m, 1H, C<sub>11</sub>H), 4.38 (app-t, *J* = 4.1, 1H, C<sub>11</sub>H), 4.23 (dq, *J* = 1.3, 7.0, 1H, C<sub>15</sub>H), 3.88 (ddd, *J* = 1.3, 6.1, 11.0, 1H, C<sub>15</sub>H), 3.44 (dd, *J* = 4.6, 14.6, 1H, C<sub>12</sub>H<sub>a</sub>), 3.34 (dd, *J* = 7.2, 13.6, 1H, C<sub>12</sub>H<sub>a</sub>), 3.25–3.15 (m, 1H, C<sub>12</sub>H<sub>b</sub>), 3.25–3.15 (m, 1H, C<sub>19</sub>H<sub>a</sub>), 3.06 (app-dt, *J* = 4.1, 10.3, 1H, C<sub>19</sub>H<sub>b</sub>), 2.52 (dd, *J* = 10.7, 13.7, 1H, C<sub>12</sub>H<sub>b</sub>), 1.89–1.80 (m, 1H, C<sub>17</sub>H<sub>a</sub>), 1.62–1.48 (m, 1H, C<sub>18</sub>H<sub>a</sub>), 1.40 (d, *J* = 6.9, 3H, C<sub>17</sub>H), 1.22–1.12 (m, 1H, C<sub>18</sub>H<sub>b</sub>), 0.59–0.47 (m, 1H, C<sub>17</sub>H).

<sup>13</sup>C NMR (125.8 MHz, methanol-*d*<sub>4</sub>, 20 °C):

$\delta$  173.1 (C<sub>13</sub>), 171.0 (C<sub>16</sub>), 170.2 (C<sub>16</sub>), 167.3 (C<sub>13</sub>), 149.3 (C<sub>9</sub>), 136.8 (C<sub>9</sub>), 136.5 (C<sub>4</sub>), 134.2 (C<sub>6</sub>), 129.5 (C<sub>7</sub>), 128.6 (C<sub>4</sub>), 126.8 (C<sub>2</sub>), 125.1 (C<sub>5</sub>), 123.2 (C<sub>7</sub>), 120.6 (C<sub>6</sub>), 117.5 (C<sub>5</sub>), 113.0 (C<sub>8</sub>), 111.2 (C<sub>8</sub>), 109.8 (C<sub>3</sub>), 87.3 (C<sub>2</sub>), 61.5 (C<sub>3</sub>), 60.8 (C<sub>11</sub>), 60.1 (C<sub>15</sub>), 57.9 (C<sub>11</sub>), 52.4 (C<sub>15</sub>), 45.9 (C<sub>19</sub>), 40.3 (C<sub>12</sub>), 30.2 (C<sub>12</sub>), 29.2 (C<sub>17</sub>), 22.3 (C<sub>18</sub>), 15.3 (C<sub>17</sub>).

FTIR (thin film) cm<sup>-1</sup>:

3353 (br-s), 2924 (w), 1662 (s), 1466 (w), 1424 (m), 1345 (w), 1308 (m), 750 (m).

HRMS (DART) ( $m/z$ ): calc'd for  $C_{30}H_{31}N_6O_4$   $[M+H]^+$ : 539.2401,  
found: 539.2416.

$[\alpha]_D^{24}$ : +110 ( $c = 0.18$ ,  $CH_3OH$ ).

TLC (7.5% methanol, 42.5% tetrahydrofuran, 50% dichloromethane),  $R_f$ : 0.23 (UV, CAM).

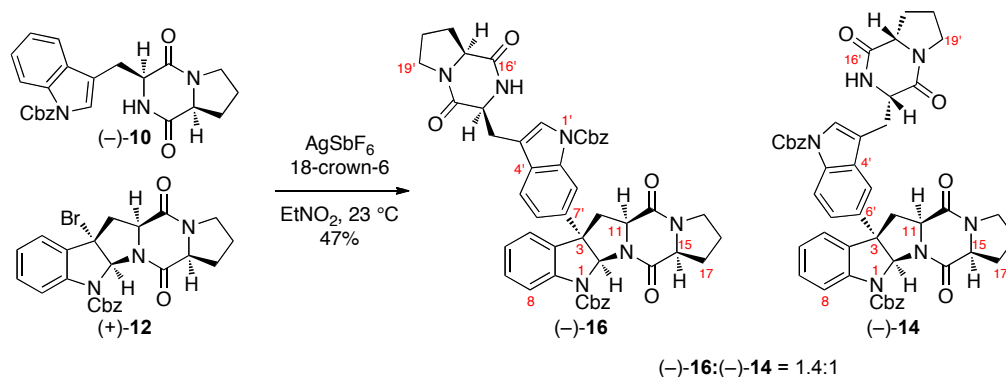

**(-)-*N*<sup>in</sup>,*N*<sup>ini</sup>-Dicarboxybenzyl *iso*-Nasesezine B (**14**):**

Silver(I) hexafluoroantimonate (69.2 mg, 202  $\mu\text{mol}$ , 5.00 equiv) was added as a solid to a solution of tetracyclic bromide (+)-**12** (20.0 mg, 40.3  $\mu\text{mol}$ , 1 equiv) and proline diketopiperazine (-)-**10** (25.2 mg, 60.4  $\mu\text{mol}$ , 1.50 equiv) in nitroethane (2 mL) at 23 °C. After 2 h, the reaction mixture was diluted with dichloromethane (60 mL) and washed with brine (60 mL). The resulting aqueous layer was extracted with dichloromethane (2  $\times$  30 mL) and the combined organic layers were dried over anhydrous sodium sulfate, were filtered, and were concentrated under reduced pressure. The crude reaction mixture was purified by flash column chromatography on silica gel (eluent: gradient, 5% methanol in ethyl acetate  $\rightarrow$  7.5% methanol in dichloromethane) to afford a regioisomeric mixture of (-)-*N*<sup>in</sup>,*N*<sup>ini</sup>-dicarboxybenzyl nasesezine B (**16**) and (-)-*N*<sup>in</sup>,*N*<sup>ini</sup>-dicarboxybenzyl *iso*-nasesezine B (**14**) (15.7 mg, 46.8%, (-)-**16**:(-)-**14**, 1.4:1) as a white solid.

Regioisomers (-)-**16** and (-)-**14** were separated for the purpose of full and independent characterization by preparative HPLC [Waters X-Bridge preparative HPLC column, C18, 5  $\mu\text{m}$ , 19  $\times$  250 mm; 20.0 mL/min; gradient, 55%  $\rightarrow$  65% acetonitrile in water, 15 min;  $t_{\text{R}}$ (-)-**16**) = 5.5 min,  $t_{\text{R}}$ (-)-**14**) = 6.6 min]. Structural assignments were made using additional information from gCOSY, HSQC, and HMBC experiments.

**(-)-*N*<sup>in</sup>,*N*<sup>ini</sup>-Dicarboxybenzyl *iso*-Nasesezine B (**14**):**

<sup>1</sup>H NMR (500 MHz, CDCl<sub>3</sub>, 20 °C):

$\delta$  8.04 (br-s, 1H, C<sub>8</sub>H), 7.65 (d,  $J$  = 8.0, 1H, C<sub>8</sub>H), 7.48 (s, 1H, C<sub>2</sub>H), 7.43 (dd,  $J$  = 1.1, 7.6, 2H, Ph<sub>Cbz</sub>-H), 7.41–7.34 (m, 5H, Ph<sub>Cbz</sub>-H), 7.34–7.25 (m, 1H, C<sub>5</sub>H), 7.34–7.25 (m, 1H, C<sub>5</sub>H), 7.34–7.25 (m, 3H, Ph<sub>Cbz</sub>-H), 7.21–7.14 (m, 1H, C<sub>7</sub>H), 7.21–7.14 (m, 1H, C<sub>7</sub>H), 7.04 (app-dt,  $J$  = 0.7, 7.5, 1H, C<sub>6</sub>H), 6.42 (s, 1H, C<sub>2</sub>H), 5.70 (s, 1H, N<sub>10</sub>H), 5.40 (s, 2H, Ph<sub>Cbz</sub>-CH<sub>2</sub>), 5.36 (d,  $J$  = 12.4, 1H, Ph<sub>Cbz</sub>-CH<sub>a</sub>), 5.30 (d,  $J$  = 12.3, 1H, Ph<sub>Cbz</sub>-CH<sub>b</sub>), 4.44 (dd,  $J$  = 3.5, 9.8, 1H, C<sub>11</sub>H), 4.23 (dd,  $J$  = 2.3, 9.6, 1H, C<sub>11</sub>H), 4.06 (app-t,  $J$  = 7.9, 1H, C<sub>15</sub>H), 4.00 (app-t,  $J$  = 7.5, 1H, C<sub>15</sub>H), 3.60 (dd,  $J$  = 3.8, 13.9, 1H, C<sub>12</sub>H<sub>a</sub>), 3.58–3.45 (m, 2H, C<sub>19</sub>H), 3.43 (dd,  $J$  = 3.0, 15.2, 1H, C<sub>12</sub>H<sub>a</sub>), 3.40–3.32 (m, 1H, C<sub>19</sub>H<sub>a</sub>), 3.20–3.11 (m, 1H, C<sub>19</sub>H<sub>b</sub>), 2.91 (dd,  $J$  = 10.0, 13.8, 1H, C<sub>12</sub>H<sub>b</sub>), 2.85 (dd,  $J$  = 10.1, 15.3, 1H, C<sub>12</sub>H<sub>b</sub>), 2.32–2.16 (m, 1H, C<sub>17</sub>H<sub>a</sub>), 2.32–2.16 (m, 1H, C<sub>17</sub>H<sub>a</sub>), 2.16–2.04 (m, 1H, C<sub>17</sub>H<sub>b</sub>), 1.98–1.65 (m,

|                                                             |                                                                                                                                                                                                                                                                                                                                                                                                                                                                                                                                                                                                                                                                                                                                                                                                                                                                                                                                                                                                                                                                                                                                                                                                                                                                 |
|-------------------------------------------------------------|-----------------------------------------------------------------------------------------------------------------------------------------------------------------------------------------------------------------------------------------------------------------------------------------------------------------------------------------------------------------------------------------------------------------------------------------------------------------------------------------------------------------------------------------------------------------------------------------------------------------------------------------------------------------------------------------------------------------------------------------------------------------------------------------------------------------------------------------------------------------------------------------------------------------------------------------------------------------------------------------------------------------------------------------------------------------------------------------------------------------------------------------------------------------------------------------------------------------------------------------------------------------|
|                                                             | 2H, C <sub>18</sub> H), 1.98–1.65 (m, 2H, C <sub>18</sub> H), 1.98–1.65 (m, 1H, C <sub>17</sub> H <sub>b</sub> ).                                                                                                                                                                                                                                                                                                                                                                                                                                                                                                                                                                                                                                                                                                                                                                                                                                                                                                                                                                                                                                                                                                                                               |
| <sup>13</sup> C NMR (125.8 MHz, CDCl <sub>3</sub> , 20 °C): | δ 169.4 (C <sub>16</sub> ), 168.0 (C <sub>16</sub> ), 165.5 (C <sub>13</sub> ), 164.9 (C <sub>13</sub> ), 153.3 (C <sub>Cbz=O</sub> ), 150.5 (C <sub>Cbz=O</sub> ), 139.7 (C <sub>9</sub> ), 137.3 (C <sub>6</sub> ), 136.3 (Ph <sub>Cbz</sub> - <i>ipso</i> -C), 135.3 (C <sub>4</sub> ), 135.0 (C <sub>9</sub> ), 134.9 (Ph <sub>Cbz</sub> - <i>ipso</i> -C), 130.1 (C <sub>4</sub> ), 129.1 (C <sub>7</sub> ), 129.1 (Ph <sub>Cbz</sub> -C), 129.0 (Ph <sub>Cbz</sub> -C), 128.8 (Ph <sub>Cbz</sub> -C), 128.7 (Ph <sub>Cbz</sub> -C), 128.2 (Ph <sub>Cbz</sub> -C), 128.2 (Ph <sub>Cbz</sub> -C), 125.3 (C <sub>5</sub> ), 125.2 (C <sub>2</sub> ), 124.5 (C <sub>6</sub> ), 123.4 (C <sub>7</sub> ), 116.8 (C <sub>8</sub> ), 116.3 (C <sub>8</sub> ), 115.9 (C <sub>5</sub> ), 115.9 (C <sub>3</sub> ), 83.5 (C <sub>2</sub> ), 69.3 (Ph <sub>Cbz</sub> CH <sub>2</sub> ), 68.2 (Ph <sub>Cbz</sub> CH <sub>2</sub> ), 61.1 (C <sub>15</sub> ), 59.7 (C <sub>11</sub> ), 59.3 (C <sub>15</sub> ), 58.7 (C <sub>3</sub> ), 54.2 (C <sub>11</sub> ), 45.6 (C <sub>19</sub> ), 45.2 (C <sub>19</sub> ), 35.2 (C <sub>12</sub> ), 28.4 (C <sub>17</sub> ), 27.6 (C <sub>17</sub> ), 26.8 (C <sub>12</sub> ), 23.6 (C <sub>18</sub> ), 22.7 (C <sub>18</sub> ). |
| FTIR (thin film) cm <sup>-1</sup> :                         | 3584 (m), 2954 (m), 1720 (s), 1677 (s), 1400 (s), 1254 (m), 750 (m).                                                                                                                                                                                                                                                                                                                                                                                                                                                                                                                                                                                                                                                                                                                                                                                                                                                                                                                                                                                                                                                                                                                                                                                            |
| HRMS (ESI) ( <i>m/z</i> ):                                  | calc'd for C <sub>48</sub> H <sub>45</sub> N <sub>6</sub> O <sub>8</sub> [M+H] <sup>+</sup> : 833.3293, found: 833.3291.                                                                                                                                                                                                                                                                                                                                                                                                                                                                                                                                                                                                                                                                                                                                                                                                                                                                                                                                                                                                                                                                                                                                        |
| [α] <sub>D</sub> <sup>24</sup> :                            | -32 ( <i>c</i> = 0.39, CHCl <sub>3</sub> ).                                                                                                                                                                                                                                                                                                                                                                                                                                                                                                                                                                                                                                                                                                                                                                                                                                                                                                                                                                                                                                                                                                                                                                                                                     |
| TLC (8% methanol in ethyl acetate), R <sub>f</sub> :        | 0.05 (UV, CAM).                                                                                                                                                                                                                                                                                                                                                                                                                                                                                                                                                                                                                                                                                                                                                                                                                                                                                                                                                                                                                                                                                                                                                                                                                                                 |

**(-)-N<sup>in</sup>,N<sup>ini</sup>-Dicarboxybenzyl Naseseazine B (16):**

Please see page S21 for the full characterization data for (-)-N<sup>in</sup>,N<sup>ini</sup>-dicarboxybenzyl naseseazine B (16).

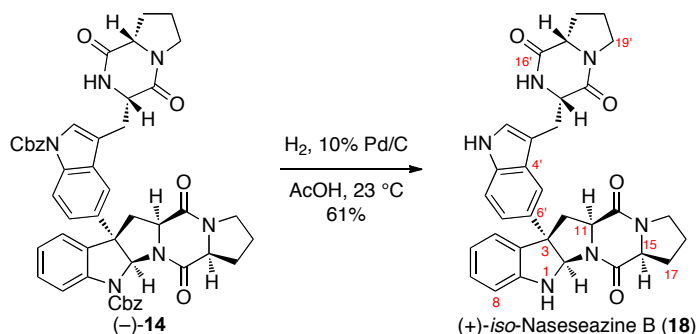

### **(+)-*iso*-Naseseazine B (18):**

Palladium on charcoal (10% w/w, 4.4 mg, 4.11  $\mu\text{mol}$ , 0.25 equiv) was added to a solution of (–)-*N*<sup>in</sup>,*N*<sup>ini</sup>-dicarboxybenzyl *iso*-naseseazine B (**14**) (13.7 mg, 16.5  $\mu\text{mol}$ , 1 equiv) in acetic acid (1 mL) at 23 °C. A stream of hydrogen gas was passed through the solution for 2 min by discharge of a balloon equipped with a needle extending into the reaction mixture. After stirring the solution for 18 h under an atmosphere of hydrogen gas, the solution was filtered over Celite. The solids were further extracted with methanol and the combined filtrates were concentrated under reduced pressure. The crude reaction mixture was purified by flash column chromatography on silica gel (eluent: 7.5% methanol, 42.5% tetrahydrofuran, 50% dichloromethane) to afford (+)-*iso*-naseseazine B (**18**) (5.7 mg, 61.4%) as a white solid. Structural assignments were made using additional information from gCOSY, HSQC, HMBC, and nOe experiments.

<sup>1</sup>H NMR (500 MHz, CDCl<sub>3</sub>, 20 °C):

$\delta$  8.28 (s, 1H, N<sub>1</sub>H), 7.59 (s, 1H, C<sub>5</sub>H), 7.33 (d,  $J$  = 8.6, 1H, C<sub>8</sub>H), 7.14–7.09 (m, 1H, C<sub>2</sub>H), 7.14–7.09 (m, 1H, C<sub>7</sub>H), 7.06 (app-dt,  $J$  = 0.9, 7.6, 1H, C<sub>7</sub>H), 6.84 (d,  $J$  = 7.4, 1H, C<sub>5</sub>H), 6.68 (app-t,  $J$  = 7.4, 1H, C<sub>6</sub>H), 6.63 (d,  $J$  = 8.0, 1H, C<sub>8</sub>H), 5.87 (d,  $J$  = 3.2, 1H, C<sub>2</sub>H), 5.76 (s, 1H, N<sub>10</sub>H), 5.29 (d,  $J$  = 3.1, 1H, N<sub>1</sub>H), 4.67 (dd,  $J$  = 7.3, 9.5, 1H, C<sub>11</sub>H), 4.33 (dd,  $J$  = 3.0, 10.7, 1H, C<sub>11</sub>H), 4.18 (app-t,  $J$  = 8.2, 1H, C<sub>15</sub>H), 4.08 (app-t,  $J$  = 7.8, 1H, C<sub>15</sub>H), 3.66 (dd,  $J$  = 3.5, 14.9, 1H, C<sub>12</sub>H<sub>a</sub>), 3.63–3.43 (m, 2H, C<sub>19</sub>H), 3.63–3.43 (m, 2H, C<sub>19</sub>H), 3.31 (dd,  $J$  = 7.1, 13.9, 1H, C<sub>12</sub>H<sub>a</sub>), 2.99 (dd,  $J$  = 10.5, 15.0, 1H, C<sub>12</sub>H<sub>b</sub>), 2.74 (dd,  $J$  = 10.5, 13.8, 1H, C<sub>12</sub>H<sub>b</sub>), 2.36–2.22 (m, 1H, C<sub>17</sub>H<sub>a</sub>), 2.36–2.22 (m, 1H, C<sub>17</sub>H<sub>a</sub>), 2.22–2.08 (m, 1H, C<sub>17</sub>H<sub>b</sub>), 2.08–1.76 (m, 2H, C<sub>18</sub>H), 2.08–1.76 (m, 2H, C<sub>18</sub>H), 2.08–1.76 (m, 1H, C<sub>17</sub>H<sub>b</sub>).

<sup>13</sup>C NMR (125.8 MHz, CDCl<sub>3</sub>, 20 °C):

$\delta$  169.5 (C<sub>16</sub>), 168.2 (C<sub>16</sub>), 166.2 (C<sub>13</sub>), 165.4 (C<sub>13</sub>), 147.3 (C<sub>9</sub>), 135.8 (C<sub>9</sub>), 134.7 (C<sub>4</sub>), 134.3 (C<sub>6</sub>), 128.7 (C<sub>7</sub>), 127.0 (C<sub>4</sub>), 124.4 (C<sub>2</sub>), 124.3 (C<sub>5</sub>), 123.1 (C<sub>7</sub>), 119.9 (C<sub>6</sub>), 115.9 (C<sub>5</sub>), 112.4 (C<sub>8</sub>), 110.3 (C<sub>3</sub>), 109.8 (C<sub>8</sub>), 86.2 (C<sub>2</sub>), 60.8 (C<sub>11</sub>), 60.7 (C<sub>15</sub>), 60.3 (C<sub>3</sub>), 59.4 (C<sub>15</sub>), 55.2 (C<sub>11</sub>), 45.6 (C<sub>19/19'</sub>), 45.4 (C<sub>19/19'</sub>), 38.6 (C<sub>12</sub>), 28.5 (C<sub>17</sub>), 27.8 (C<sub>17</sub>), 27.1 (C<sub>12</sub>), 23.5 (C<sub>18</sub>), 22.7 (C<sub>18</sub>).

FTIR (thin film)  $\text{cm}^{-1}$ : 3306 (br, s), 2925 (w), 1660 (s), 1428 (m), 1341 (w), 1312 (w), 1215 (w), 750 (m).

HRMS (ESI) ( $m/z$ ): calc'd for  $\text{C}_{32}\text{H}_{33}\text{N}_6\text{O}_4$   $[\text{M}+\text{H}]^+$ : 565.2558, found: 565.2544.

$[\alpha]_{\text{D}}^{24}$ : +43 ( $c = 0.15$ ,  $\text{CHCl}_3$ ).

TLC (5% methanol, 45% tetrahydrofuran, 50% dichloromethane),  $R_f$ : 0.18 (UV, CAM).



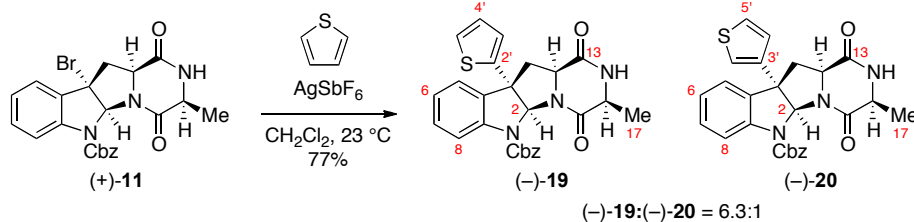

### **3-(2-Thienyl)tetracycle (-)-19 and 3-(3-Thienyl)tetracycle (-)-20:**

A solution of silver(I) hexafluoroantimonate (0.20 M, 425  $\mu\text{L}$ , 85.1  $\mu\text{mol}$ , 2.00 equiv) in dichloromethane was added via syringe to a solution of tetracyclic bromide (+)-11 (20.0 mg, 42.5  $\mu\text{mol}$ , 1 equiv) and thiophene (6.7  $\mu\text{L}$ , 85  $\mu\text{mol}$ , 2.0 equiv) in dichloromethane (2 mL) at 23  $^\circ\text{C}$ . After 1 h, brine (200  $\mu\text{L}$ ) was added to the solution. The crude reaction mixture was purified by flash column chromatography on silica gel (eluent: 20% acetone in dichloromethane) to afford a mixture of regioisomeric 3-(thienyl)tetracycles (Run 1: 15.3 mg, 76.0%, (-)-19:(-)-20, 6.2:1; Run 2: 15.6 mg, 77.5%, (-)-19:(-)-20, 6.4:1) as a clear film.

Regioisomers (-)-19 and (-)-20 were separated for the purpose of full and independent characterization by preparative HPLC [Waters X-Bridge preparative HPLC column, C18, 5  $\mu\text{m}$ , 19  $\times$  250 mm; 20.0 mL/min; 50% acetonitrile in water;  $t_{\text{R}}((-)-19) = 8.4$  min,  $t_{\text{R}}((-)-20) = 8.7$  min]. Structural assignments were made using additional information from gCOSY, HSQC, and HMBC experiments.

### **3-(2-Thienyl)tetracycle (-)-19:**

$^1\text{H}$  NMR (500 MHz,  $\text{CDCl}_3$ , 20  $^\circ\text{C}$ ):

$\delta$  7.68 (d,  $J = 8.3$ , 1H,  $\text{C}_8\text{H}$ ), 7.38 (d,  $J = 7.9$ , 2H,  $\text{Ph}_{\text{Cbz-}o}\text{H}$ ), 7.35–7.27 (m, 3H,  $\text{Ph}_{\text{Cbz-}H}$ ), 7.35–7.27 (m, 1H,  $\text{C}_5\text{H}$ ), 7.24 (app-dt,  $J = 1.3, 7.8$ , 1H,  $\text{C}_7\text{H}$ ), 7.17 (dd,  $J = 1.2, 5.1$ , 1H,  $\text{C}_5\text{H}$ ), 7.06 (app-dt,  $J = 1.0, 7.6$ , 1H,  $\text{C}_6\text{H}$ ), 6.84 (dd,  $J = 3.6, 5.1$ , 1H,  $\text{C}_4\text{H}$ ), 6.63 (dd,  $J = 1.2, 3.6$ , 1H,  $\text{C}_3\text{H}$ ), 6.22 (s, 1H,  $\text{C}_2\text{H}$ ), 5.46 (s, 1H,  $\text{N}_{14}\text{H}$ ), 5.38 (d,  $J = 12.3$ , 1H,  $\text{Ph}_{\text{Cbz}}\text{CH}_a$ ), 5.28 (d,  $J = 12.3$ , 1H,  $\text{Ph}_{\text{Cbz}}\text{CH}_b$ ), 4.40 (dd,  $J = 3.3, 10.0$ , 1H,  $\text{C}_{11}\text{H}$ ), 3.99 (q,  $J = 6.9$ , 1H,  $\text{C}_{15}\text{H}$ ), 3.54 (dd,  $J = 3.5, 14.0$ , 1H,  $\text{C}_{12}\text{H}_a$ ), 2.93 (dd,  $J = 10.1, 13.9$ , 1H,  $\text{C}_{12}\text{H}_b$ ), 1.33 (d,  $J = 6.9$ , 3H,  $\text{C}_{17}\text{H}$ ).

$^{13}\text{C}$  NMR (125.8 MHz,  $\text{CDCl}_3$ , 20  $^\circ\text{C}$ ):

$\delta$  169.3 ( $\text{C}_{13}$ ), 167.7 ( $\text{C}_{16}$ ), 153.2 ( $\text{C}_{\text{Cbz=O}}$ ), 145.3 ( $\text{C}_2$ ), 139.9 ( $\text{C}_9$ ), 136.3 ( $\text{Ph}_{\text{Cbz-}ipso}\text{C}$ ), 134.6 ( $\text{C}_4$ ), 129.6 ( $\text{C}_7$ ), 128.7 ( $\text{Ph}_{\text{Cbz-}C}$ ), 128.3 ( $\text{Ph}_{\text{Cbz-}C}$ ), 128.2 ( $\text{Ph}_{\text{Cbz-}C}$ ), 127.3 ( $\text{C}_4'$ ), 125.3 ( $\text{C}_5'$ ), 124.9 ( $\text{C}_5$ ), 124.9 ( $\text{C}_3$ ), 124.4 ( $\text{C}_6$ ), 117.1 ( $\text{C}_8$ ), 83.9 ( $\text{C}_2$ ), 68.1 ( $\text{Ph}_{\text{Cbz}}\text{CH}_2$ ), 58.4 ( $\text{C}_{11}$ ), 56.3 ( $\text{C}_3$ ), 51.9 ( $\text{C}_{15}$ ), 35.5 ( $\text{C}_{12}$ ), 15.3 ( $\text{C}_{17}$ ).

FTIR (thin film)  $\text{cm}^{-1}$ :

3260 (br, m), 1712 (s), 1689 (s), 1409 (m), 1311 (m).

HRMS (ESI) ( $m/z$ ):

calc'd for  $\text{C}_{26}\text{H}_{24}\text{N}_3\text{O}_4\text{S}$  [ $\text{M}+\text{H}$ ] $^+$ : 474.1482,  
found: 474.1470.

$[\alpha]_{\text{D}}^{24}$ :

-35 ( $c = 0.33$ ,  $\text{CHCl}_3$ ).

TLC (ethyl acetate), *R<sub>f</sub>*: 0.47 (UV, CAM).

**3-(3-Thienyl)tetracycle (-)-20:**

<sup>1</sup>H NMR (500 MHz, CDCl<sub>3</sub>, 20 °C): δ 7.66 (d, *J* = 8.1, 1H, C<sub>8</sub>H), 7.37 (dd, *J* = 1.8, 8.3, 2H, Ph<sub>Cbz</sub>-*o*-H), 7.35–7.30 (m, 3H, Ph<sub>Cbz</sub>-H), 7.29 (d, *J* = 7.3, 1H, C<sub>5</sub>H), 7.26 (dd, *J* = 3.0, 5.1, 1H, C<sub>4</sub>H), 7.21 (app-dt, *J* = 1.3, 7.8, 1H, C<sub>7</sub>H), 7.05 (app-dt, *J* = 1.0, 7.5, 1H, C<sub>6</sub>H), 6.90 (dd, *J* = 1.4, 5.1, 1H, C<sub>5</sub>H), 6.80 (dd, *J* = 1.4, 3.0, 1H, C<sub>2</sub>H), 6.24 (s, 1H, C<sub>2</sub>H), 5.54 (s, 1H, N<sub>14</sub>H), 5.40 (d, *J* = 12.4, 1H, Ph<sub>Cbz</sub>CH<sub>a</sub>), 5.28 (d, *J* = 12.3, 1H, Ph<sub>Cbz</sub>CH<sub>b</sub>), 4.37 (dd, *J* = 3.4, 10.1, 1H, C<sub>11</sub>H), 3.99 (q, *J* = 6.9, 1H, C<sub>15</sub>H), 3.47 (dd, *J* = 3.4, 13.8, 1H, C<sub>12</sub>H<sub>a</sub>), 2.84 (dd, *J* = 10.1, 13.9, 1H, C<sub>12</sub>H<sub>b</sub>), 1.33 (d, *J* = 6.9, 3H, C<sub>17</sub>H).

<sup>13</sup>C NMR (125.8 MHz, CDCl<sub>3</sub>, 20 °C): δ 169.3 (C<sub>13</sub>), 167.7 (C<sub>16</sub>), 153.2 (C<sub>Cbz</sub>=O), 142.3 (C<sub>3</sub>), 139.9 (C<sub>9</sub>), 136.3 (Ph<sub>Cbz</sub>-*ipso*-C), 134.8 (C<sub>4</sub>), 129.3 (C<sub>7</sub>), 128.7 (Ph<sub>Cbz</sub>-C), 128.3 (Ph<sub>Cbz</sub>-C), 128.3 (Ph<sub>Cbz</sub>-C), 127.5 (C<sub>4</sub>), 125.5 (C<sub>5</sub>), 124.8 (C<sub>5</sub>), 124.4 (C<sub>6</sub>), 121.5 (C<sub>2</sub>), 117.1 (C<sub>8</sub>), 83.0 (C<sub>2</sub>), 68.2 (Ph<sub>Cbz</sub>CH<sub>2</sub>), 58.4 (C<sub>11</sub>), 56.2 (C<sub>3</sub>), 51.9 (C<sub>15</sub>), 34.4 (C<sub>12</sub>), 15.3 (C<sub>17</sub>).

FTIR (thin film) cm<sup>-1</sup>: 3268 (br, m), 1709 (s), 1689 (s), 1481 (m), 1409 (m).

HRMS (ESI) (*m/z*): calc'd for C<sub>26</sub>H<sub>24</sub>N<sub>3</sub>O<sub>4</sub>S [M+H]<sup>+</sup>: 474.1482, found: 474.1465.

[α]<sub>D</sub><sup>24</sup>: -17 (*c* = 0.21, CHCl<sub>3</sub>).

TLC (ethyl acetate), *R<sub>f</sub>*: 0.43 (UV, CAM).

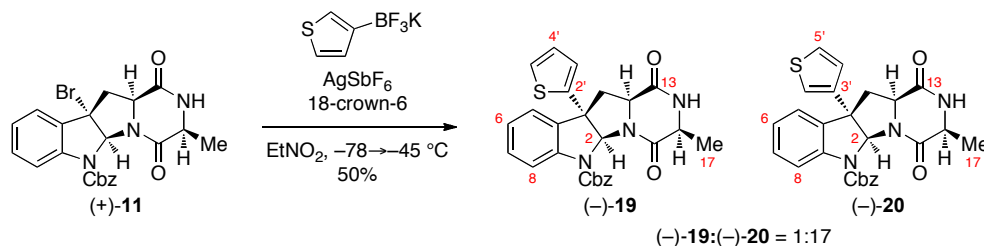

### **3-(2-Thienyl)tetracycle (-)-19 and 3-(3-Thienyl)tetracycle (-)-20:**

A Schlenk tube was charged with tetracyclic bromide (+)-**11** (20.0 mg, 42.5  $\mu\text{mol}$ , 1 equiv), potassium 3-thiophenetrifluoroborate (16.2 mg, 85.1  $\mu\text{mol}$ , 2.00 equiv), and 18-crown-6 (22.4 mg, 85.1  $\mu\text{mol}$ , 2.00 equiv). Nitroethane (2 mL) was then introduced via syringe. Upon dissolution of all solid components, the reaction mixture was cooled to  $-78 \text{ } ^\circ\text{C}$ . A solution of silver(I) hexafluoroantimonate (0.17 M, 500  $\mu\text{L}$ , 85.1  $\mu\text{mol}$ , 2.00 equiv) in nitroethane at  $-78 \text{ } ^\circ\text{C}$  was then introduced to the Schlenk tube via cannula. The vessel was subsequently fitted with a PTFE screw cap, sealed, and introduced into a cold bath at  $-45 \text{ } ^\circ\text{C}$ . After 12 h, aqueous hydrogen chloride (2 N, 4 mL) was added. The reaction mixture was diluted with ethyl acetate (60 mL) and washed with brine (3  $\times$  60 mL). The organic layer was dried over anhydrous sodium sulfate, was filtered, and was concentrated under reduced pressure. The residue was diluted with dichloromethane (30 mL) and washed with brine (30 mL). The resulting aqueous layer was extracted with dichloromethane (2  $\times$  30 mL). The combined organic layers were dried over anhydrous sodium sulfate, were filtered, and were concentrated under reduced pressure. The crude reaction mixture was purified by flash column chromatography on silica gel (eluent: 90% ethyl acetate in hexanes) to afford a mixture of regioisomeric 3-(thienyl)tetracycles (Run 1: 10.4 mg, 51.6%, (-)-**19**:(-)-**20**, 1:17; Run 2: 9.5 mg, 47%, (-)-**19**:(-)-**20**, 1:17) as a clear film.

### **3-(2-Thienyl)tetracycle (-)-19:**

Please see page S33 for the full characterization data for 3-(2-thienyl)tetracycle (-)-**19**.

### **3-(3-Thienyl)tetracycle (-)-20:**

Please see page S34 for the full characterization data for 3-(3-thienyl)tetracycle (-)-**20**.

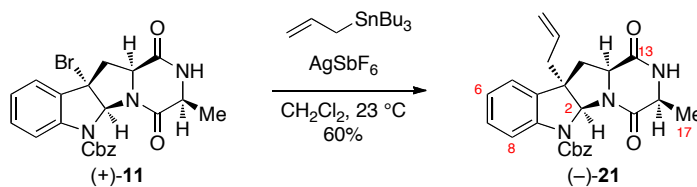

### 3-Allyltetracycle (–)-21:

A solution of silver(I) hexafluoroantimonate (0.20 M, 425  $\mu$ L, 85.1  $\mu$ mol, 2.00 equiv) in dichloromethane was added via syringe to a solution of tetracyclic bromide (+)-**11** (20.0 mg, 42.5  $\mu$ mol, 1 equiv) and allyltributylstannane (26.1  $\mu$ L, 85.1  $\mu$ mol, 2.00 equiv) in dichloromethane (2 mL) at 23  $^{\circ}$ C. After 1 h, brine (200  $\mu$ L) was added to the solution. The crude reaction mixture was then purified by flash column chromatography on silica gel (eluent: 20% acetone in dichloromethane) to afford 3-allyl tetracycle (–)-**21** (Run 1: 11.1 mg, 60.5%; Run 2: 10.9 mg, 59.4%) as a clear film. Structural assignments were made using additional information from gCOSY, HSQC, and HMBC experiments.

$^1\text{H}$  NMR (500 MHz,  $\text{CDCl}_3$ , 20  $^{\circ}$ C):

$\delta$  7.61 (d,  $J = 7.0$ , 1H,  $\text{C}_8\text{H}$ ), 7.42 (d,  $J = 8.3$ , 2H,  $\text{Ph}_{\text{Cbz-}o\text{-H}}$ ), 7.37–7.27 (m, 3H,  $\text{Ph}_{\text{Cbz-H}}$ ), 7.21–7.15 (m, 1H,  $\text{C}_7\text{H}$ ), 7.21–7.15 (m, 1H,  $\text{C}_5\text{H}$ ), 7.01 (app-dt,  $J = 0.9, 7.5$ , 1H,  $\text{C}_6\text{H}$ ), 5.93 (s, 1H,  $\text{C}_2\text{H}$ ), 5.84 (br-s, 1H,  $\text{N}_{14}\text{H}$ ), 5.47–5.40 (m, 1H,  $\text{CH}_2\text{CH}=\text{CH}_2$ ), 5.41 (d,  $J = 12.3$ , 1H,  $\text{Ph}_{\text{Cbz}}\text{CH}_a$ ), 5.27 (d,  $J = 12.3$ , 1H,  $\text{Ph}_{\text{Cbz}}\text{CH}_b$ ), 5.03–4.94 (m, 2H,  $\text{CH}_2\text{CH}=\text{CH}_2$ ), 4.19 (dd,  $J = 3.9, 10.1$ , 1H,  $\text{C}_{11}\text{H}$ ), 3.93 (q,  $J = 6.8$ , 1H,  $\text{C}_{15}\text{H}$ ), 3.03 (dd,  $J = 4.0, 13.8$ , 1H,  $\text{C}_{12}\text{H}_a$ ), 2.44–2.28 (m, 2H,  $\text{CH}_2\text{CH}=\text{CH}_2$ ), 2.44–2.28 (m, 1H,  $\text{C}_{12}\text{H}_b$ ), 1.30 (d,  $J = 6.8$ , 3H,  $\text{C}_{17}\text{H}$ ).

$^{13}\text{C}$  NMR (125.8 MHz,  $\text{CDCl}_3$ , 20  $^{\circ}$ C):

$\delta$  169.5 ( $\text{C}_{13}$ ), 167.6 ( $\text{C}_{16}$ ), 153.3 ( $\text{C}_{\text{Cbz}}=\text{O}$ ), 140.3 ( $\text{C}_9$ ), 136.4 ( $\text{Ph}_{\text{Cbz-}ipso\text{-C}}$ ), 135.0 ( $\text{C}_4$ ), 132.2 ( $\text{CH}_2\text{CH}=\text{CH}_2$ ), 128.9 ( $\text{C}_7$ ), 128.7 ( $\text{Ph}_{\text{Cbz-C}}$ ), 128.4 ( $\text{Ph}_{\text{Cbz-C}}$ ), 128.3 ( $\text{Ph}_{\text{Cbz-C}}$ ), 124.2 ( $\text{C}_5$ ), 124.1 ( $\text{C}_6$ ), 119.9 ( $\text{CH}_2\text{CH}=\text{CH}_2$ ), 116.8 ( $\text{C}_8$ ), 81.1 ( $\text{C}_2$ ), 68.1 ( $\text{Ph}_{\text{Cbz}}\text{CH}_2$ ), 58.1 ( $\text{C}_{11}$ ), 54.7 ( $\text{C}_3$ ), 51.9 ( $\text{C}_{15}$ ), 42.4 ( $\text{CH}_2\text{CH}=\text{CH}_2$ ), 32.8 ( $\text{C}_{12}$ ), 15.4 ( $\text{C}_{17}$ ).

FTIR (thin film)  $\text{cm}^{-1}$ :

3264 (br, m), 1687 (s), 1481 (m), 1410 (m), 1328 (m).

HRMS (ESI) ( $m/z$ ):

calc'd for  $\text{C}_{25}\text{H}_{26}\text{N}_3\text{O}_4$  [ $\text{M}+\text{H}$ ] $^+$ : 432.1918,  
found: 432.1906.

$[\alpha]_D^{24}$ :

–37 ( $c = 0.26$ ,  $\text{CHCl}_3$ ).

TLC (ethyl acetate),  $R_f$ :

0.34 (UV, CAM).

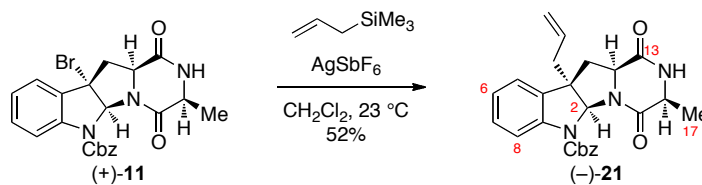

### **3-Allyltetracycle (–)-**21**:**

A solution of silver(I) hexafluoroantimonate (0.20 M, 425  $\mu$ L, 85.1  $\mu$ mol, 2.00 equiv) in dichloromethane was added via syringe to a solution of tetracyclic bromide (+)-**11** (20.0 mg, 42.5  $\mu$ mol, 1 equiv) and allyltrimethylsilane (13.5  $\mu$ L, 85.1  $\mu$ mol, 2.00 equiv) in dichloromethane (2 mL) at 23 °C. After 1 h, brine (200  $\mu$ L) was added to the solution. The crude reaction mixture was purified by flash column chromatography on silica gel (eluent: 20% acetone in dichloromethane) to afford 3-allyl tetracycle (–)-**21** (Run 1: 9.5 mg, 52%; Run 2: 9.6 mg, 52%) as a clear film.

Please see page S36 for the full characterization data for 3-allyltetracycle (–)-**21**.

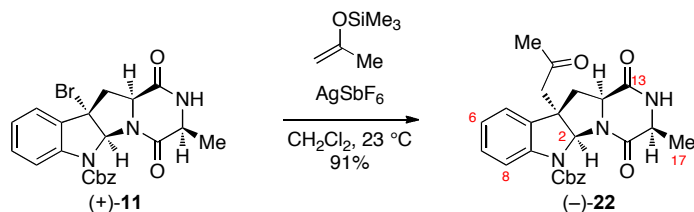

### 3-Acetonyltetracycle (–)-22:

A solution of silver(I) hexafluoroantimonate (0.20 M, 425  $\mu\text{L}$ , 85.1  $\mu\text{mol}$ , 2.00 equiv) in dichloromethane was added via syringe to a solution of tetracyclic bromide (+)-**11** (20.0 mg, 42.5  $\mu\text{mol}$ , 1 equiv) and (isopropenyloxy)trimethylsilane (85% purity, 16.6  $\mu\text{L}$ , 85.1  $\mu\text{mol}$ , 2.00 equiv) in dichloromethane (2 mL) at 23  $^\circ\text{C}$ . After 1 h, brine (200  $\mu\text{L}$ ) was added to the solution. The crude reaction mixture was purified by flash column chromatography on silica gel (eluent: 20% acetone in dichloromethane) to afford 3-acetonyltetracycle (–)-**22** (Run 1: 17.3 mg, 90.9%; Run 2: 17.2 mg, 90.4%) as a clear film. Structural assignments were made using additional information from gCOSY, HSQC, and HMBC experiments.

$^1\text{H}$  NMR (500 MHz,  $\text{CDCl}_3$ , 20  $^\circ\text{C}$ ):

$\delta$  7.60 (app-s, 1H,  $\text{C}_8\text{H}$ ), 7.41 (d,  $J = 7.1$ , 2H,  $\text{Ph}_{\text{Cbz-}o\text{-H}}$ ), 7.34 (app-t,  $J = 6.8$ , 2H,  $\text{Ph}_{\text{Cbz-}m\text{-H}}$ ), 7.32–7.27 (m, 1H,  $\text{Ph}_{\text{Cbz-}p\text{-H}}$ ), 7.19 (d,  $J = 7.5$ , 1H,  $\text{C}_5\text{H}$ ), 7.16 (app-t,  $J = 7.8$ , 1H,  $\text{C}_7\text{H}$ ), 6.99 (app-t,  $J = 7.5$ , 1H,  $\text{C}_6\text{H}$ ), 6.29 (br-s, 1H,  $\text{N}_{14}\text{H}$ ), 6.12 (s, 1H,  $\text{C}_2\text{H}$ ), 5.39 (d,  $J = 12.3$ , 1H,  $\text{Ph}_{\text{Cbz}}\text{CH}_a$ ), 5.27 (d,  $J = 12.3$ , 1H,  $\text{Ph}_{\text{Cbz}}\text{CH}_b$ ), 4.42 (dd,  $J = 5.3, 9.8$ , 1H,  $\text{C}_{11}\text{H}$ ), 3.97 (q,  $J = 6.7$ , 1H,  $\text{C}_{15}\text{H}$ ), 2.98 (dd,  $J = 5.4, 13.5$ , 1H,  $\text{C}_{12}\text{H}_a$ ), 2.90 (d,  $J = 18.4$ , 1H,  $\text{CH}_2\text{C}(=\text{O})\text{CH}_3$ ), 2.65 (d,  $J = 18.4$ , 1H,  $\text{CH}_2\text{C}(=\text{O})\text{CH}_3$ ), 2.52 (dd,  $J = 10.1, 13.5$ , 1H,  $\text{C}_{12}\text{H}_b$ ), 2.04 (s, 3H,  $\text{CH}_2\text{C}(=\text{O})\text{CH}_3$ ), 1.31 (d,  $J = 6.8$ , 3H,  $\text{C}_{17}\text{H}$ ).

$^{13}\text{C}$  NMR (125.8 MHz,  $\text{CDCl}_3$ , 20  $^\circ\text{C}$ ):

$\delta$  206.0 ( $\text{CH}_2\text{C}(=\text{O})\text{CH}_3$ ), 170.0 ( $\text{C}_{13}$ ), 167.7 ( $\text{C}_{16}$ ), 153.6 ( $\text{C}_{\text{Cbz}}=\text{O}$ ), 139.8 ( $\text{C}_9$ ), 136.2 ( $\text{Ph}_{\text{Cbz-}ipso\text{-C}}$ ), 135.9 ( $\text{C}_4$ ), 129.0 ( $\text{C}_7$ ), 128.7 ( $\text{Ph}_{\text{Cbz-}C}$ ), 128.5 ( $\text{Ph}_{\text{Cbz-}C}$ ), 128.3 ( $\text{Ph}_{\text{Cbz-}C}$ ), 124.4 ( $\text{C}_6$ ), 124.3 ( $\text{C}_5$ ), 116.9 ( $\text{C}_8$ ), 80.5 ( $\text{C}_2$ ), 68.2 ( $\text{Ph}_{\text{Cbz}}\text{CH}_2$ ), 58.2 ( $\text{C}_{11}$ ), 51.9 ( $\text{C}_{15}$ ), 51.4 ( $\text{C}_3$ ), 49.2 ( $\text{CH}_2\text{C}(=\text{O})\text{CH}_3$ ), 33.4 ( $\text{C}_{12}$ ), 31.0 ( $\text{CH}_2\text{C}(=\text{O})\text{CH}_3$ ), 15.6 ( $\text{C}_{17}$ ).

FTIR (thin film)  $\text{cm}^{-1}$ :

3271 (br, m), 1712 (s), 1688 (s), 1481(m), 1410 (m).

HRMS (ESI) ( $m/z$ ):

calc'd for  $\text{C}_{25}\text{H}_{26}\text{N}_3\text{O}_5$  [ $\text{M}+\text{H}$ ] $^+$ : 448.1867,  
found: 448.1846.

$[\alpha]_D^{24}$ :

–59 ( $c = 0.52$ ,  $\text{CHCl}_3$ ).

TLC (ethyl acetate),  $R_f$ :

0.23 (UV, CAM).

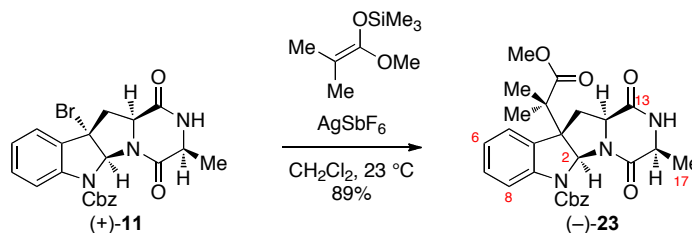

### **3-(Methyl- $\alpha,\alpha$ -dimethylacetate)tetracycle (-)-23:**

A solution of silver(I) hexafluoroantimonate (0.20 M, 425  $\mu$ L, 85.1  $\mu$ mol, 2.00 equiv) in dichloromethane was added via syringe to a solution of tetracyclic bromide (+)-**11** (20.0 mg, 42.5  $\mu$ mol, 1 equiv) and methyl trimethylsilyl dimethylketene acetal (17.2  $\mu$ L, 85.1  $\mu$ mol, 2.00 equiv) in dichloromethane (2 mL) at 23  $^{\circ}$ C. After 1 h, brine (200  $\mu$ L) was added to the solution. The crude reaction mixture was purified by flash column chromatography on silica gel (eluent: 20% acetone in dichloromethane) to afford 3-(methyl- $\alpha,\alpha$ -dimethylacetate)tetracycle (-)-**23** (Run 1: 18.4 mg, 88.2%; Run 2: 18.8 mg, 89.9%) as a clear film. Structural assignments were made using additional information from gCOSY, HSQC, and HMBC experiments.

$^1\text{H}$  NMR (500 MHz,  $\text{CDCl}_3$ , 20  $^{\circ}$ C):

$\delta$  7.69 (app-s, 1H,  $\text{C}_8\text{H}$ ), 7.38 (m, 2H,  $\text{Ph}_{\text{Cbz-}o\text{-H}}$ ), 7.32 (app-t,  $J = 7.5$ , 2H,  $\text{Ph}_{\text{Cbz-}m\text{-H}}$ ), 7.29–7.25 (m, 1H,  $\text{Ph}_{\text{Cbz-}p\text{-H}}$ ), 7.20 (app-t,  $J = 7.2$ , 1H,  $\text{C}_7\text{H}$ ), 7.18 (d,  $J = 7.6$ , 1H,  $\text{C}_5\text{H}$ ), 7.01 (app-dt,  $J = 0.9$ , 7.6, 1H,  $\text{C}_6\text{H}$ ), 6.45 (s, 1H,  $\text{C}_2\text{H}$ ), 6.17 (br-s, 1H,  $\text{N}_{14}\text{H}$ ), 5.58–5.08 (br-m, 2H,  $\text{Ph}_{\text{Cbz}}\text{CH}_2$ ), 4.38–4.27 (br-m, 1H,  $\text{C}_{11}\text{H}$ ), 3.95 (q,  $J = 6.2$ , 1H,  $\text{C}_{15}\text{H}$ ), 3.63 (s, 3H,  $\text{OCH}_3$ ), 2.91–2.75 (br-m, 1H,  $\text{C}_{12}\text{H}_a$ ), 2.71–2.57 (br-m, 1H,  $\text{C}_{12}\text{H}_b$ ), 1.32 (d,  $J = 6.8$ , 3H,  $\text{C}_{17}\text{H}$ ), 1.26 (s, 3H,  $\text{C}(\text{CH}_3)_2$ ), 0.88 (s, 3H,  $\text{C}(\text{CH}_3)_2$ ).

$^{13}\text{C}$  NMR (125.8 MHz,  $\text{CDCl}_3$ , 20  $^{\circ}$ C):

$\delta$  176.6 ( $\text{CO}_2\text{CH}_3$ ), 170.1 ( $\text{C}_{13}$ ), 167.7 ( $\text{C}_{16}$ ), 153.1 ( $\text{C}_{\text{Cbz=O}}$ ), 141.2 ( $\text{C}_9$ ), 136.5 ( $\text{Ph}_{\text{Cbz-}ipso\text{-C}}$ ), 133.0 ( $\text{C}_8$ ), 129.3 ( $\text{C}_7$ ), 128.6 ( $\text{Ph}_{\text{Cbz-}C}$ ), 128.2 ( $\text{Ph}_{\text{Cbz-}C}$ ), 128.1 ( $\text{Ph}_{\text{Cbz-}C}$ ), 126.3 ( $\text{C}_5$ ), 123.9 ( $\text{C}_6$ ), 117.2 ( $\text{C}_4$ ), 80.3 ( $\text{C}_2$ ), 68.1 ( $\text{Ph}_{\text{Cbz}}\text{CH}_2$ ), 58.7 ( $\text{C}_3$ ), 58.2 ( $\text{C}_{11}$ ), 52.4 ( $\text{OCH}_3$ ), 51.9 ( $\text{C}_{15}$ ), 47.7 ( $\text{C}(\text{CH}_3)_2$ ), 33.4 ( $\text{C}_{12}$ ), 21.7 ( $\text{C}(\text{CH}_3)_2$ ), 21.7 ( $\text{C}(\text{CH}_3)_2$ ), 15.7 ( $\text{C}_{17}$ ).

FTIR (thin film)  $\text{cm}^{-1}$ :

3266 (br, m), 1717 (s), 1688 (s), 1482 (m), 1410 (m).

HRMS (ESI) ( $m/z$ ):

calc'd for  $\text{C}_{27}\text{H}_{30}\text{N}_3\text{O}_6$  [ $\text{M}+\text{H}$ ] $^+$ : 492.2129,  
found: 492.2137.

$[\alpha]_D^{24}$ :

-52 ( $c = 0.29$ ,  $\text{CHCl}_3$ ).

TLC (ethyl acetate),  $R_f$ :

0.38 (UV, CAM).

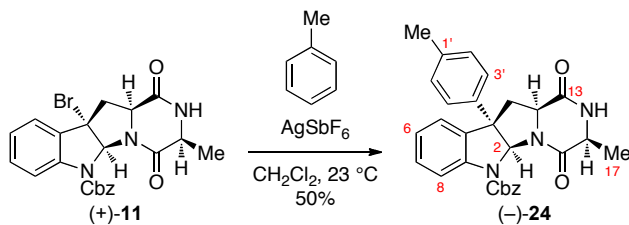

### 3-(4-Tolyl)tetracycle (-)-24:

A solution of silver(I) hexafluoroantimonate (0.20 M, 425  $\mu\text{L}$ , 85.1  $\mu\text{mol}$ , 2.00 equiv) in dichloromethane was added via syringe to a solution of tetracyclic bromide (+)-11 (20.0 mg, 42.5  $\mu\text{mol}$ , 1 equiv) and toluene (9.1  $\mu\text{L}$ , 85  $\mu\text{mol}$ , 2.0 equiv) in dichloromethane (2 mL) at 23  $^\circ\text{C}$ . After 1 h, brine (200  $\mu\text{L}$ ) was added to the solution. The crude reaction mixture was purified by flash column chromatography on silica gel (eluent: 20% acetone in dichloromethane) to afford 3-(4-tolyl)tetracycle (-)-24 (Run 1: 11.1 mg, 54.2%; Run 2: 9.3 mg, 45%) as a clear film. Structural assignments were made using additional information from gCOSY, HSQC, and HMBC experiments.

$^1\text{H}$  NMR (500 MHz,  $\text{CDCl}_3$ , 20  $^\circ\text{C}$ ):

$\delta$  7.64 (d,  $J = 7.9$ , 1H,  $\text{C}_8\text{H}$ ), 7.37 (d,  $J = 7.5$ , 2H,  $\text{Ph}_{\text{Cbz-}o}\text{H}$ ), 7.35–7.26 (m, 3H,  $\text{Ph}_{\text{Cbz-}H}$ ), 7.35–7.26 (m, 1H,  $\text{C}_5\text{H}$ ), 7.18 (app-t,  $J = 7.9$ , 1H,  $\text{C}_7\text{H}$ ), 7.07–7.00 (m, 2H,  $\text{C}_3\text{H}$ ), 7.07–7.00 (m, 2H,  $\text{C}_2\text{H}$ ), 7.07–7.00 (m, 1H,  $\text{C}_6\text{H}$ ), 6.34 (s, 1H,  $\text{C}_2\text{H}$ ), 5.85 (s, 1H,  $\text{N}_{14}\text{H}$ ), 5.41 (d,  $J = 12.4$ , 1H,  $\text{Ph}_{\text{Cbz}}\text{CH}_a$ ), 5.28 (d,  $J = 12.3$ , 1H,  $\text{Ph}_{\text{Cbz}}\text{CH}_b$ ), 4.37 (dd,  $J = 3.4$ , 10.1, 1H,  $\text{C}_{11}\text{H}$ ), 3.98 (q,  $J = 6.8$ , 1H,  $\text{C}_{15}\text{H}$ ), 3.49 (dd,  $J = 3.4$ , 13.8, 1H,  $\text{C}_{12}\text{H}_a$ ), 2.85 (dd,  $J = 10.3$ , 13.9, 1H,  $\text{C}_{12}\text{H}_b$ ), 2.26 (s, 3H,  $\text{ArCH}_3$ ), 1.33 (d,  $J = 6.8$ , 3H,  $\text{C}_{17}\text{H}$ ).

$^{13}\text{C}$  NMR (125.8 MHz,  $\text{CDCl}_3$ , 20  $^\circ\text{C}$ ):

$\delta$  169.6 ( $\text{C}_{13}$ ), 167.7 ( $\text{C}_{16}$ ), 153.1 ( $\text{C}_{\text{Cbz}}=\text{O}$ ), 139.8 ( $\text{C}_9$ ), 138.8 ( $\text{C}_4$ ), 137.5 ( $\text{C}_{1'}$ ), 136.3 ( $\text{Ph}_{\text{Cbz-}ipso}\text{C}$ ), 135.1 ( $\text{C}_4$ ), 129.8 ( $\text{C}_{2'}$ ), 129.1 ( $\text{C}_7$ ), 128.7 ( $\text{Ph}_{\text{Cbz-}C}$ ), 128.2 ( $\text{Ph}_{\text{Cbz-}C}$ ), 128.2 ( $\text{Ph}_{\text{Cbz-}C}$ ), 125.7 ( $\text{C}_3$ ), 125.1 ( $\text{C}_5$ ), 124.3 ( $\text{C}_6$ ), 117.0 ( $\text{C}_8$ ), 83.3 ( $\text{C}_2$ ), 68.1 ( $\text{Ph}_{\text{Cbz}}\text{CH}_2$ ), 58.6 ( $\text{C}_{11}$ ), 58.3 ( $\text{C}_3$ ), 51.9 ( $\text{C}_{15}$ ), 35.0 ( $\text{C}_{12}$ ), 21.1 ( $\text{ArCH}_3$ ), 15.3 ( $\text{C}_{17}$ ).

FTIR (thin film)  $\text{cm}^{-1}$ :

3268 (br, m), 1712 (s), 1689 (s), 1409 (m), 1313 (m).

HRMS (ESI) ( $m/z$ ):

calc'd for  $\text{C}_{29}\text{H}_{28}\text{N}_3\text{O}_4$   $[\text{M}+\text{H}]^+$ : 482.2074,  
found: 482.2056.

$[\alpha]_D^{24}$ :

-6.4 ( $c = 0.28$ ,  $\text{CHCl}_3$ ).

TLC (20% acetone in dichloromethane),  $R_f$ :

0.22 (UV, CAM).



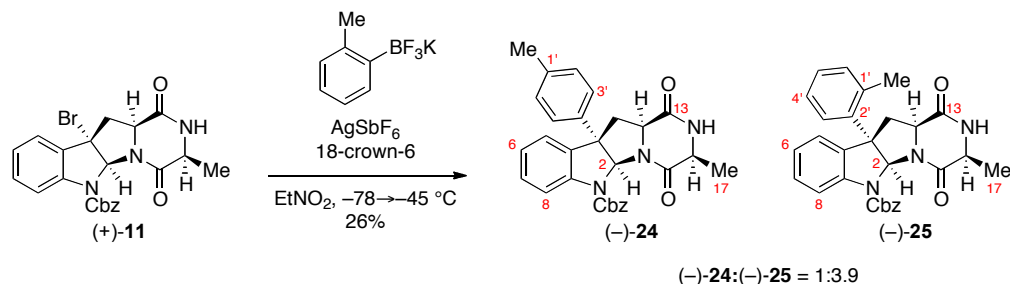

### **3-(4-Tolyl)tetracycle (-)-24 and 3-(2-Tolyl)tetracycle (-)-25:**

A Schlenk tube was charged with tetracyclic bromide (+)-**11** (20.0 mg, 42.5  $\mu\text{mol}$ , 1 equiv), potassium *o*-tolyltrifluoroborate (16.8 mg, 85.1  $\mu\text{mol}$ , 2.00 equiv), and 18-crown-6 (22.4 mg, 85.1  $\mu\text{mol}$ , 2.00 equiv). Nitroethane (2 mL) was then introduced via syringe. Upon dissolution of all solid components, the reaction mixture was cooled to  $-78\text{ }^\circ\text{C}$ . A solution of silver(I) hexafluoroantimonate (0.17 M, 500  $\mu\text{L}$ , 85.1  $\mu\text{mol}$ , 2.00 equiv) in nitroethane at  $-78\text{ }^\circ\text{C}$  was then introduced to the Schlenk tube via cannula. The vessel was subsequently fitted with a PTFE screw cap, sealed, and introduced into a cold bath at  $-45\text{ }^\circ\text{C}$ . After 12 h, aqueous hydrogen chloride (2 N, 4 mL) was added. The reaction mixture was diluted with ethyl acetate (60 mL) and washed with brine ( $3 \times 60\text{ mL}$ ). The organic layer was dried over anhydrous sodium sulfate, was filtered, and was concentrated under reduced pressure. The residue was diluted with dichloromethane (30 mL) and washed with brine (30 mL). The resulting aqueous layer was extracted with dichloromethane ( $2 \times 30\text{ mL}$ ). The combined organic layers were dried over anhydrous sodium sulfate, were filtered, and were concentrated under reduced pressure. The crude reaction mixture was purified by flash column chromatography on silica gel (eluent: 90% ethyl acetate in hexanes) to afford a mixture of regioisomeric 3-(tolyl)tetracycles (Run 1: 5.1 mg, 25%, (-)-**24**:(-)-**25**, 1:4.2; Run 2: 5.4 mg, 26%, (-)-**24**:(-)-**25**, 1:3.7) as a clear film.

Regioisomers (-)-**24** and (-)-**25** were separated for the purpose of full and independent characterization by preparative HPLC [Waters X-Bridge preparative HPLC column, C18, 5  $\mu\text{m}$ ,  $19 \times 250\text{ mm}$ ; 20.0 mL/min; 50% acetonitrile in water;  $t_{\text{R}}((\text{-})\text{-}\mathbf{25}) = 11.5\text{ min}$ ,  $t_{\text{R}}((\text{-})\text{-}\mathbf{24}) = 12.4\text{ min}$ ]. Structural assignments were made using additional information from gCOSY, HSQC, and HMBC experiments.

### **3-(4-Tolyl)tetracycle (-)-24:**

Please see page S40 for the full characterization data for 3-(4-tolyl)tetracycle (-)-**24**.

### **3-(2-Tolyl)tetracycle (-)-25:**

$^1\text{H NMR}$  (500 MHz,  $\text{CDCl}_3$ ,  $20\text{ }^\circ\text{C}$ ):

$\delta$  7.66 (d,  $J = 8.0$ , 1H,  $\text{C}_8\text{H}$ ), 7.34–7.22 (m, 5H,  $\text{Ph}_{\text{Cbz}}\text{-H}$ ), 7.34–7.22 (m, 1H,  $\text{C}_5\text{H}$ ), 7.34–7.22 ( $\text{C}_7\text{H}$ ), 7.19 (d,  $J = 7.4$ , 1H,  $\text{C}_6\text{H}$ ), 7.16 (app-dt,  $J = 1.0$ , 7.4, 1H,  $\text{C}_5\text{H}$ ), 7.10 (app-dt,  $J = 1.0$ , 7.5, 1H,  $\text{C}_6\text{H}$ ), 7.01 (app-dt,  $J = 1.2$ , 7.5, 1H,  $\text{C}_4\text{H}$ ), 6.85 (d,  $J = 7.8$ , 1H,  $\text{C}_3\text{H}$ ), 6.50 (s, 1H,  $\text{C}_2\text{H}$ ), 5.62 (s, 1H,  $\text{N}_{14}\text{H}$ ), 5.33 (d,  $J = 12.4$ , 1H,  $\text{Ph}_{\text{Cbz}}\text{CH}_a$ ), 5.24 (d,  $J = 12.4$ , 1H,  $\text{Ph}_{\text{Cbz}}\text{CH}_b$ ), 4.50 (dd,  $J = 5.7$ , 9.6, 1H,  $\text{C}_{11}\text{H}$ ), 4.02 (q,  $J = 6.8$ , 1H,  $\text{C}_{15}\text{H}$ ), 3.26 (dd,  $J = 5.8$ , 14.4, 1H,  $\text{C}_{12}\text{H}_a$ ), 3.04 (dd,  $J = 9.7$ , 14.3, 1H,  $\text{C}_{12}\text{H}_b$ ), 2.40 (s, 3H,  $\text{ArCH}_3$ ), 1.34 (d,  $J = 6.9$ , 3H,  $\text{C}_{17}\text{H}$ ).

|                                                           |                                                                                                                                                                                                                                                                                                                                                                                                                                                                                                                                                                                                                                                                                                                                                                                                             |
|-----------------------------------------------------------|-------------------------------------------------------------------------------------------------------------------------------------------------------------------------------------------------------------------------------------------------------------------------------------------------------------------------------------------------------------------------------------------------------------------------------------------------------------------------------------------------------------------------------------------------------------------------------------------------------------------------------------------------------------------------------------------------------------------------------------------------------------------------------------------------------------|
| $^{13}\text{C}$ NMR (125.8 MHz, $\text{CDCl}_3$ , 20 °C): | $\delta$ 169.6 ( $\text{C}_{13}$ ), 168.0 ( $\text{C}_{16}$ ), 153.3 ( $\text{C}_{\text{Cbz}=\text{O}}$ ), 140.1 ( $\text{C}_9$ ), 137.9 ( $\text{C}_2$ ), 136.3 ( $\text{Ph}_{\text{Cbz-}i\text{prso-C}}$ ), 135.8 ( $\text{C}_1$ ), 135.5 ( $\text{C}_4$ ), 133.2 ( $\text{C}_{6'}$ ), 129.2 ( $\text{C}_7$ ), 128.7 ( $\text{Ph}_{\text{Cbz-C}}$ ), 128.2 ( $\text{C}_3$ ), 128.2 ( $\text{C}_5$ ), 128.2 ( $\text{Ph}_{\text{Cbz-C}}$ ), 128.1 ( $\text{Ph}_{\text{Cbz-C}}$ ), 126.4 ( $\text{C}_4'$ ), 125.9 ( $\text{C}_5$ ), 124.2 ( $\text{C}_6$ ), 117.2 ( $\text{C}_8$ ), 82.6 ( $\text{C}_2$ ), 68.0 ( $\text{Ph}_{\text{Cbz-CH}_2}$ ), 59.1 ( $\text{C}_3$ ), 59.0 ( $\text{C}_{11}$ ), 52.1 ( $\text{C}_{15}$ ), 36.0 ( $\text{C}_{12}$ ), 21.9 ( $\text{ArCH}_3$ ), 15.5 ( $\text{C}_{17}$ ). |
| FTIR (thin film) $\text{cm}^{-1}$ :                       | 1689 (s), 1481 (m), 1405 (m), 1329 (m), 751 (m).                                                                                                                                                                                                                                                                                                                                                                                                                                                                                                                                                                                                                                                                                                                                                            |
| HRMS (ESI) ( $m/z$ ):                                     | calc'd for $\text{C}_{29}\text{H}_{28}\text{N}_3\text{O}_4$ [ $\text{M}+\text{H}$ ] $^+$ : 482.2074,<br>found: 482.2066.                                                                                                                                                                                                                                                                                                                                                                                                                                                                                                                                                                                                                                                                                    |
| $[\alpha]_{\text{D}}^{24}$ :                              | -69 ( $c = 0.13$ , $\text{CHCl}_3$ ).                                                                                                                                                                                                                                                                                                                                                                                                                                                                                                                                                                                                                                                                                                                                                                       |
| TLC (ethyl acetate), $R_f$ :                              | 0.44 (UV, CAM).                                                                                                                                                                                                                                                                                                                                                                                                                                                                                                                                                                                                                                                                                                                                                                                             |

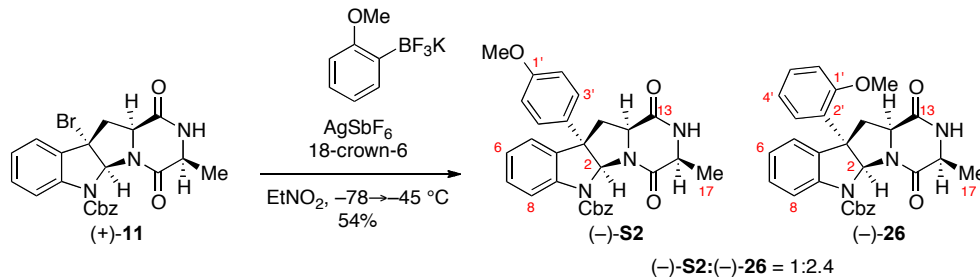

### **3-(4-Methoxyphenyl)tetracycle (-)-S2 and 3-(2-Methoxyphenyl)tetracycle (-)-26:**

A Schlenk tube was charged with tetracyclic bromide (+)-**11** (20.0 mg, 42.5  $\mu\text{mol}$ , 1 equiv), potassium 2-methoxytrifluoroborate (18.2 mg, 85.1  $\mu\text{mol}$ , 2.00 equiv), and 18-crown-6 (22.4 mg, 85.1  $\mu\text{mol}$ , 2.00 equiv). Nitroethane (2 mL) was then introduced via syringe. Upon dissolution of all solid components, the reaction mixture was cooled to  $-78 \text{ } ^\circ\text{C}$ . A solution of silver(I) hexafluoroantimonate (0.17 M, 500  $\mu\text{L}$ , 85.1  $\mu\text{mol}$ , 2.00 equiv) in nitroethane at  $-78 \text{ } ^\circ\text{C}$  was then introduced to the Schlenk tube via cannula. The vessel was subsequently fitted with a PTFE screw cap, sealed, and introduced into a cold bath at  $-45 \text{ } ^\circ\text{C}$ . After 12 h, aqueous hydrogen chloride (2 N, 4 mL) was added. The reaction mixture was diluted with ethyl acetate (60 mL) and washed with brine (3  $\times$  60 mL). The organic layer was dried over anhydrous sodium sulfate, was filtered, and was concentrated under reduced pressure. The residue was diluted with dichloromethane (30 mL) and washed with brine (30 mL). The resulting aqueous layer was extracted with dichloromethane (2  $\times$  30 mL). The combined organic layers were dried over anhydrous sodium sulfate, were filtered, and were concentrated under reduced pressure. The crude reaction mixture was purified by flash column chromatography on silica gel (eluent: 90% ethyl acetate in hexanes) to afford a mixture of regioisomeric 3-(methoxyphenyl)tetracycles (Run 1: 11.9 mg, 56.2%, (-)-**S2**:(-)-**26**, 1:2.2; Run 2: 11.1 mg, 52.5%, (-)-**S2**:(-)-**26**, 1:2.7) as a clear film.

Regioisomers (-)-**S2** and (-)-**26** were separated for the purpose of full and independent characterization by preparative HPLC [Waters X-Bridge preparative HPLC column, C18, 5  $\mu\text{m}$ , 19  $\times$  250 mm; 20.0 mL/min; gradient, 40%  $\rightarrow$  60% acetonitrile in water, 20 min;  $t_{\text{R}}(\text{S2}) = 12.5 \text{ min}$ ,  $t_{\text{R}}(\text{26}) = 14.6 \text{ min}$ ]. Structural assignments were made using additional information from gCOSY, HSQC, and HMBC experiments.

### **3-(4-Methoxyphenyl)tetracycle (-)-S2:**

$^1\text{H}$  NMR (500 MHz,  $\text{CDCl}_3$ ,  $20 \text{ } ^\circ\text{C}$ ):

$\delta$  7.65 (d,  $J = 7.9$ , 1H,  $\text{C}_8\text{H}$ ), 7.37 (dd,  $J = 1.1$ , 8.2, 2H,  $\text{Ph}_{\text{Cbz-}o}\text{H}$ ), 7.35–7.26 (m, 3H,  $\text{Ph}_{\text{Cbz}}\text{H}$ ), 7.35–7.26 (m, 1H,  $\text{C}_5\text{H}$ ), 7.20 (app-dt,  $J = 1.2$ , 8.1, 1H,  $\text{C}_7\text{H}$ ), 7.07–7.02 (m, 1H,  $\text{C}_6\text{H}$ ), 7.07–7.02 (m, 2H,  $\text{C}_3\text{H}$ ), 6.76 (d,  $J = 8.9$ , 2H,  $\text{C}_2\text{H}$ ), 6.31 (s, 1H,  $\text{C}_2\text{H}$ ), 5.42 (s, 1H,  $\text{N}_{14}\text{H}$ ), 5.41 (d,  $J = 12.2$ , 1H,  $\text{Ph}_{\text{Cbz}}\text{CH}_a$ ), 5.28 (d,  $J = 12.3$ , 1H,  $\text{Ph}_{\text{Cbz}}\text{H}_b$ ), 4.38 (dd,  $J = 3.4$ , 10.1, 1H,  $\text{C}_{11}\text{H}$ ), 4.00 (q,  $J = 6.8$ , 1H,  $\text{C}_{15}\text{H}$ ), 3.73 (s, 3H,  $\text{OCH}_3$ ), 3.50 (dd,  $J = 3.4$ , 13.9, 1H,  $\text{C}_{12}\text{H}_a$ ), 2.84 (dd,  $J = 10.2$ , 13.9, 1H,  $\text{C}_{12}\text{H}_b$ ), 1.33 (d,  $J = 6.8$ , 3H,  $\text{C}_{17}\text{H}$ ).

$^{13}\text{C}$  NMR (125.8 MHz,  $\text{CDCl}_3$ ,  $20 \text{ } ^\circ\text{C}$ ):

$\delta$  169.3 ( $\text{C}_{13}$ ), 167.7 ( $\text{C}_{16}$ ), 159.0 ( $\text{C}_{11}$ ), 153.2 ( $\text{C}_{\text{Cbz}}=\text{O}$ ), 139.8 ( $\text{C}_9$ ), 136.4 ( $\text{Ph}_{\text{Cbz-}ipso}\text{C}$ ), 135.1 ( $\text{C}_4$ ), 133.7 ( $\text{C}_4$ ), 129.1 ( $\text{C}_7$ ), 128.7 ( $\text{Ph}_{\text{Cbz}}\text{C}$ ), 128.7 ( $\text{Ph}_{\text{Cbz}}\text{C}$ ), 128.3 ( $\text{Ph}_{\text{Cbz}}\text{C}$ ), 127.1 ( $\text{C}_3$ ), 125.2

|                                       |                                                                                                                                                                                                                                                                                                                        |
|---------------------------------------|------------------------------------------------------------------------------------------------------------------------------------------------------------------------------------------------------------------------------------------------------------------------------------------------------------------------|
|                                       | (C <sub>5</sub> ), 124.4 (C <sub>6</sub> ), 117.1 (C <sub>8</sub> ), 114.5 (C <sub>2</sub> ), 83.5 (C <sub>2</sub> ), 68.1 (Ph <sub>Cbz</sub> CH <sub>2</sub> ), 58.7 (C <sub>11</sub> ), 58.1 (C <sub>3</sub> ), 55.5 (OCH <sub>3</sub> ), 51.9 (C <sub>15</sub> ), 35.0 (C <sub>12</sub> ), 15.4 (C <sub>17</sub> ). |
| FTIR (thin film) cm <sup>-1</sup> :   | 1709 (s), 1688 (s), 1409 (m), 1312 (m), 1254 (m).                                                                                                                                                                                                                                                                      |
| HRMS (ESI) ( <i>m/z</i> ):            | calc'd for C <sub>29</sub> H <sub>28</sub> N <sub>3</sub> O <sub>5</sub> [M+H] <sup>+</sup> : 498.2023, found: 498.2032.                                                                                                                                                                                               |
| [α] <sub>D</sub> <sup>24</sup> :      | -13 ( <i>c</i> = 0.070, CHCl <sub>3</sub> ).                                                                                                                                                                                                                                                                           |
| TLC (ethyl acetate), R <sub>f</sub> : | 0.40 (UV, CAM).                                                                                                                                                                                                                                                                                                        |

### **3-(2-Methoxyphenyl)tetracycle (-)-26:**

|                                                             |                                                                                                                                                                                                                                                                                                                                                                                                                                                                                                                                                                                                                                                                                                                                                                                                                                                                                                                                                                                       |
|-------------------------------------------------------------|---------------------------------------------------------------------------------------------------------------------------------------------------------------------------------------------------------------------------------------------------------------------------------------------------------------------------------------------------------------------------------------------------------------------------------------------------------------------------------------------------------------------------------------------------------------------------------------------------------------------------------------------------------------------------------------------------------------------------------------------------------------------------------------------------------------------------------------------------------------------------------------------------------------------------------------------------------------------------------------|
| <sup>1</sup> H NMR (500 MHz, CDCl <sub>3</sub> , 20 °C):    | δ 7.61 (d, <i>J</i> = 7.5, 1H, C <sub>8</sub> H), 7.36 (d, <i>J</i> = 7.1, 1H, C <sub>5</sub> H), 7.32–7.20 (m, 1H, C <sub>7</sub> H), 7.32–7.20 (m, 5H, Ph <sub>Cbz</sub> -H), 7.32–7.20 (m, 1H, C <sub>5</sub> H), 7.13 (app-t, <i>J</i> = 7.5, 1H, C <sub>6</sub> H), 6.92 (d, <i>J</i> = 8.0, 1H, C <sub>6</sub> H), 6.75 (app-t, <i>J</i> = 7.4, 1H, C <sub>4</sub> H), 6.66 (dd, <i>J</i> = 1.6, 7.8, 1H, C <sub>3</sub> H), 6.45 (s, 1H, C <sub>2</sub> H), 5.90–5.75 (m, 1H, N <sub>14</sub> H), 5.36 (d, <i>J</i> = 12.5, 1H, Ph <sub>Cbz</sub> CH <sub>a</sub> ), 5.19 (d, <i>J</i> = 12.5, 1H, Ph <sub>Cbz</sub> CH <sub>b</sub> ), 4.52 (dd, <i>J</i> = 5.8, 9.9, 1H, C <sub>11</sub> H), 4.05 (q, <i>J</i> = 6.8, 1H, C <sub>15</sub> H), 3.89 (s, 3H, OCH <sub>3</sub> ), 3.12 (dd, <i>J</i> = 5.8, 13.5, 1H, C <sub>12</sub> H <sub>a</sub> ), 3.01 (dd, <i>J</i> = 10.1, 13.5, 1H, C <sub>12</sub> H <sub>b</sub> ), 1.36 (d, <i>J</i> = 6.9, 3H, C <sub>17</sub> H). |
| <sup>13</sup> C NMR (125.8 MHz, CDCl <sub>3</sub> , 20 °C): | δ 170.1 (C <sub>13</sub> ), 167.6 (C <sub>16</sub> ), 156.8 (C <sub>1</sub> ), 153.4 (C <sub>Cbz</sub> =O), 140.5 (C <sub>9</sub> ), 136.4 (Ph <sub>Cbz</sub> - <i>ipso</i> -C), 135.4 (C <sub>4</sub> ), 129.4 (C <sub>5</sub> ), 129.2 (C <sub>3</sub> ), 129.1 (C <sub>7</sub> ), 128.8 (C <sub>2</sub> ), 128.6 (Ph <sub>Cbz</sub> -C), 128.1 (Ph <sub>Cbz</sub> -C), 127.9 (Ph <sub>Cbz</sub> -C), 126.8 (C <sub>5</sub> ), 124.2 (C <sub>6</sub> ), 120.8 (C <sub>4</sub> ), 117.5 (C <sub>8</sub> ), 111.5 (C <sub>6</sub> ), 82.1 (C <sub>2</sub> ), 67.9 (Ph <sub>Cbz</sub> CH <sub>2</sub> ), 58.7 (C <sub>11</sub> ), 56.8 (C <sub>3</sub> ), 55.6 (OCH <sub>3</sub> ), 52.0 (C <sub>15</sub> ), 36.3 (C <sub>12</sub> ), 15.9 (C <sub>17</sub> ).                                                                                                                                                                                                                         |
| FTIR (thin film) cm <sup>-1</sup> :                         | 1712 (s), 1688 (s), 1482 (m), 1409 (m), 1326 (m).                                                                                                                                                                                                                                                                                                                                                                                                                                                                                                                                                                                                                                                                                                                                                                                                                                                                                                                                     |
| HRMS (ESI) ( <i>m/z</i> ):                                  | calc'd for C <sub>29</sub> H <sub>28</sub> N <sub>3</sub> O <sub>5</sub> [M+H] <sup>+</sup> : 498.2023, found: 498.2033.                                                                                                                                                                                                                                                                                                                                                                                                                                                                                                                                                                                                                                                                                                                                                                                                                                                              |
| [α] <sub>D</sub> <sup>24</sup> :                            | -152 ( <i>c</i> = 0.15, CHCl <sub>3</sub> ).                                                                                                                                                                                                                                                                                                                                                                                                                                                                                                                                                                                                                                                                                                                                                                                                                                                                                                                                          |
| TLC (ethyl acetate), R <sub>f</sub> :                       | 0.33 (UV, CAM).                                                                                                                                                                                                                                                                                                                                                                                                                                                                                                                                                                                                                                                                                                                                                                                                                                                                                                                                                                       |

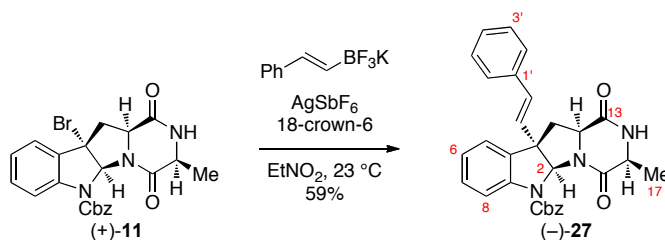

### 3-(*trans*-Styryl)tetracycle (–)-27:

A solution of silver(I) hexafluoroantimonate (0.20 M, 425  $\mu$ L, 85.1  $\mu$ mol, 2.00 equiv) in nitroethane was added via syringe to a solution of tetracyclic bromide (+)-11 (20.0 mg, 42.5  $\mu$ mol, 1 equiv), potassium *trans*-styryltrifluoroborate (17.9 mg, 85.1  $\mu$ mol, 2.00 equiv), and 18-crown-6 (22.4 mg, 85.1  $\mu$ mol, 2.00 equiv) in nitroethane (2 mL) at 23  $^{\circ}$ C. After 1 h, aqueous hydrogen chloride (2 N, 4 mL) was added. The reaction mixture was diluted with ethyl acetate (60 mL) and washed with brine (3  $\times$  60 mL). The organic layer was dried over anhydrous sodium sulfate, was filtered, and was concentrated under reduced pressure. The crude reaction mixture was purified by flash column chromatography on silica gel (eluent: 20% acetone in dichloromethane). The fractions containing the desired product were combined and were concentrated under reduced pressure. The resulting residue was loaded onto a silica gel column and purified by flash column chromatography (eluent: 90% ethyl acetate in hexanes) to afford 3-(*trans*-styryl)tetracycle (–)-27 (Run 1: 12.6 mg, 60.0%; Run 2: 12.0 mg, 57.2%) as a white foam. Structural assignments were made using additional information from gCOSY, HSQC, and HMBC experiments.

$^1$ H NMR (500 MHz,  $\text{CDCl}_3$ , 20  $^{\circ}$ C):

$\delta$  7.68 (d,  $J$  = 8.0, 1H,  $\text{C}_8\text{H}$ ), 7.41 (d,  $J$  = 7.1, 2H,  $\text{Ph}_{\text{Cbz-}o\text{-H}}$ ), 7.33–7.18 (m, 1H,  $\text{C}_7\text{H}$ ), 7.33–7.18 (m, 1H,  $\text{C}_5\text{H}$ ), 7.33–7.18 (m, 8H,  $\text{ArH}$ ), 7.08 (app-t,  $J$  = 7.5, 1H,  $\text{C}_6\text{H}$ ), 6.25 (d,  $J$  = 16.0, 1H,  $\text{CH=CHPh}$ ), 6.09 (d,  $J$  = 14.4, 1H,  $\text{CH=CHPh}$ ), 6.07 (s, 1H,  $\text{C}_2\text{H}$ ), 5.77 (br-s, 1H,  $\text{N}_{14}\text{H}$ ), 5.39 (d,  $J$  = 12.3, 1H,  $\text{Ph}_{\text{Cbz}}\text{CH}_a$ ), 5.29 (d,  $J$  = 12.3, 1H,  $\text{Ph}_{\text{Cbz}}\text{CH}_b$ ), 4.31 (dd,  $J$  = 3.1, 10.0, 1H,  $\text{C}_{11}\text{H}$ ), 3.97 (q,  $J$  = 6.8, 1H,  $\text{C}_{15}\text{H}$ ), 3.28 (dd,  $J$  = 3.3, 13.9, 1H,  $\text{C}_{12}\text{H}_a$ ), 2.63 (dd,  $J$  = 10.2, 13.8, 1H,  $\text{C}_{12}\text{H}_b$ ), 1.32 (d,  $J$  = 6.8, 3H,  $\text{C}_{17}\text{H}$ ).

$^{13}$ C NMR (125.8 MHz,  $\text{CDCl}_3$ , 20  $^{\circ}$ C):

$\delta$  169.5 ( $\text{C}_{13}$ ), 167.7 ( $\text{C}_{16}$ ), 153.4 ( $\text{C}_{\text{Cbz=O}}$ ), 140.4 ( $\text{C}_9$ ), 136.3 ( $\text{Ph}_{\text{Cbz-}ipso\text{-C}}$ ), 136.1 ( $\text{Ph}_{\text{styrene-}ipso\text{-C}}$ ), 133.1 ( $\text{C}_4$ ), 131.7 ( $\text{CH=CHPh}$ ), 129.4 ( $\text{CH=CHPh}$ ), 129.3 ( $\text{Ph}_{\text{Cbz-}C}$ ), 128.8 ( $\text{Ph}_{\text{Cbz-}C}$ ), 128.7 ( $\text{Ph}_{\text{Cbz-}C}$ ), 128.4 ( $\text{Ph}_{\text{Cbz-}C}$ ), 128.3 ( $\text{Ph}_{\text{Cbz-}C}$ ), 128.2 ( $\text{Ph}_{\text{Cbz-}C}$ ), 126.8 ( $\text{C}_7$ ), 125.2 ( $\text{C}_5$ ), 124.3 ( $\text{C}_6$ ), 116.9 ( $\text{C}_8$ ), 81.9 ( $\text{C}_2$ ), 68.2 ( $\text{Ph}_{\text{Cbz}}\text{CH}_2$ ), 58.3 ( $\text{C}_{11}$ ), 57.2 ( $\text{C}_3$ ), 51.9 ( $\text{C}_{15}$ ), 33.3 ( $\text{C}_{12}$ ), 15.3 ( $\text{C}_{17}$ ).

FTIR (thin film)  $\text{cm}^{-1}$ :

3262 (br, m), 1712 (s), 1690 (s), 1409 (m), 1315 (m).

HRMS (ESI) ( $m/z$ ):

calc'd for  $\text{C}_{30}\text{H}_{28}\text{N}_3\text{O}_4$  [ $\text{M}+\text{H}$ ] $^+$ : 494.2074,  
found: 494.2084.

$[\alpha]_D^{24}$ :

–23 ( $c$  = 0.081,  $\text{CHCl}_3$ ).

TLC (ethyl acetate),  $R_f$ :

0.44 (UV, CAM).

**Table S1. Comparison of our data for (+)-Nasesezine A (1) with literature:**

| Assignment <sup>11</sup> | Raju et al. Report <sup>4,12</sup><br>(+)-Nasesezine A (1)<br><sup>1</sup> H NMR, 600 MHz, methanol- <i>d</i> <sub>4</sub> | This Work<br>(+)-Nasesezine A (1)<br><sup>1</sup> H NMR, 500 MHz, methanol- <i>d</i> <sub>4</sub> , 20 °C |
|--------------------------|----------------------------------------------------------------------------------------------------------------------------|-----------------------------------------------------------------------------------------------------------|
| N1                       | -                                                                                                                          | -                                                                                                         |
| C2                       | 5.83 (s)                                                                                                                   | 5.83 (s)                                                                                                  |
| C3                       | -                                                                                                                          | -                                                                                                         |
| C4                       | -                                                                                                                          | -                                                                                                         |
| C5                       | 6.85 (d, <i>J</i> = 7.4)                                                                                                   | 6.85 (dd, <i>J</i> = 0.6, 7.4)                                                                            |
| C6                       | 6.67 (t, <i>J</i> = 7.5)                                                                                                   | 6.68 (app-dt, <i>J</i> = 0.9, 7.4)                                                                        |
| C7                       | 7.05 (t, <i>J</i> = 7.2)                                                                                                   | 7.05 (app-dt, <i>J</i> = 1.3, 7.9)                                                                        |
| C8                       | 6.69 (d, <i>J</i> = 7.6)                                                                                                   | 6.69 (d, <i>J</i> = 8.0)                                                                                  |
| C9                       | -                                                                                                                          | -                                                                                                         |
| N10                      | -                                                                                                                          | -                                                                                                         |
| C11                      | 4.64 (dd, <i>J</i> = 7.4, 8.4)                                                                                             | 4.65 (dd, <i>J</i> = 7.4, 9.2)                                                                            |
| C12                      | 3.26 (m)<br>2.59 (dd, <i>J</i> = 10.2, 13.7)                                                                               | 3.30–3.20 (m)<br>2.59 (dd, <i>J</i> = 9.9, 13.6)                                                          |
| C13                      | -                                                                                                                          | -                                                                                                         |
| N14                      | -                                                                                                                          | -                                                                                                         |
| C15                      | 4.15 (q, <i>J</i> = 6.9)                                                                                                   | 4.16 (dq, <i>J</i> = 1.4, 6.9)                                                                            |
| C16                      | -                                                                                                                          | -                                                                                                         |
| C17                      | 1.38 (d, <i>J</i> = 6.9)                                                                                                   | 1.38 (d, <i>J</i> = 7.1)                                                                                  |
| N1'                      | -                                                                                                                          | -                                                                                                         |
| C2'                      | 7.11 (s)                                                                                                                   | 7.12 (s)                                                                                                  |
| C3'                      | -                                                                                                                          | -                                                                                                         |
| C4'                      | -                                                                                                                          | -                                                                                                         |
| C5'                      | 7.57 (d, <i>J</i> = 8.4)                                                                                                   | 7.57 (d, <i>J</i> = 8.4)                                                                                  |
| C6'                      | 7.02 (d, <i>J</i> = 8.4)                                                                                                   | 7.03 (dd, <i>J</i> = 1.7, 8.4)                                                                            |
| C7'                      | -                                                                                                                          | -                                                                                                         |
| C8'                      | 7.40 (s)                                                                                                                   | 7.40 (d, <i>J</i> = 1.3)                                                                                  |
| C9'                      | -                                                                                                                          | -                                                                                                         |
| N10'                     | -                                                                                                                          | -                                                                                                         |
| C11'                     | 4.39 (br-t, <i>J</i> = 4.5)                                                                                                | 4.39 (app-dt, <i>J</i> = 1.1, 4.7)                                                                        |
| C12'                     | 3.30 (m)<br>3.28 (m)                                                                                                       | 3.30–3.20 (m)                                                                                             |
| C13'                     | -                                                                                                                          | -                                                                                                         |
| N14'                     | -                                                                                                                          | -                                                                                                         |
| C15'                     | 3.97 (dd, <i>J</i> = 6.6, 10.8)                                                                                            | 3.98 (ddd, <i>J</i> = 1.7, 6.3, 10.9)                                                                     |
| C16'                     | -                                                                                                                          | -                                                                                                         |
| C17'                     | 1.97 (m)<br>0.93 (m)                                                                                                       | 1.96 (app-ddt, <i>J</i> = 2.0, 7.2, 12.5)<br>0.96–0.85 (m)                                                |
| C18'                     | 1.66 (m)<br>1.43 (m)                                                                                                       | 1.72–1.61 (m)<br>1.47–1.39 (m)                                                                            |
| C19'                     | 3.42 (dt, <i>J</i> = 8.1, 11.8)<br>3.24 (m)                                                                                | 3.42 (app-dt, <i>J</i> = 8.3, 11.7)<br>3.30–3.20 (m)                                                      |

<sup>11</sup> Please see page S3 for the positional numbering system used in this report.

<sup>12</sup> The reference points for the residual protium and carbon resonances of the NMR solvent were not listed.

**Table S2. Comparison of our data for (+)-Nasesezine A (1) with literature:**

| Assignment <sup>11</sup> | Raju et al. Report <sup>4,12</sup><br>(+)-Nasesezine A (1)<br><sup>1</sup> H NMR, 600 MHz, DMSO- <i>d</i> <sub>6</sub> | This Work<br>(+)-Nasesezine A (1)<br><sup>1</sup> H NMR, 500 MHz, DMSO- <i>d</i> <sub>6</sub> , 20 °C |
|--------------------------|------------------------------------------------------------------------------------------------------------------------|-------------------------------------------------------------------------------------------------------|
| N1                       | 6.72 (d, <i>J</i> = 2.8)                                                                                               | 6.75 (d, <i>J</i> = 2.8)                                                                              |
| C2                       | 5.65 (d, <i>J</i> = 2.8)                                                                                               | 5.65 (d, <i>J</i> = 2.8)                                                                              |
| C3                       | -                                                                                                                      | -                                                                                                     |
| C4                       | -                                                                                                                      | -                                                                                                     |
| C5                       | 6.82 (d, <i>J</i> = 7.3)                                                                                               | 6.83 (d, <i>J</i> = 7.3)                                                                              |
| C6                       | 6.57 (dt, <i>J</i> = 0.7, 7.5)                                                                                         | 6.58 (app-t, <i>J</i> = 7.4)                                                                          |
| C7                       | 7.00 (t, <i>J</i> = 7.2)                                                                                               | 7.04–6.95 (m)                                                                                         |
| C8                       | 6.61 (d, <i>J</i> = 7.8)                                                                                               | 6.62 (d, <i>J</i> = 8.0)                                                                              |
| C9                       | -                                                                                                                      | -                                                                                                     |
| N10                      | -                                                                                                                      | -                                                                                                     |
| C11                      | 4.60 (dd, <i>J</i> = 8.4, 9.9)                                                                                         | 4.62 (app-t, <i>J</i> = 8.7)                                                                          |
| C12                      | 3.08 (dd, <i>J</i> = 7.6, 13.6)<br>2.41 (dd, <i>J</i> = 9.9, 13.6)                                                     | 3.14–3.00 (m)<br>2.41 (dd, <i>J</i> = 10.0, 13.6)                                                     |
| C13                      | -                                                                                                                      | -                                                                                                     |
| N14                      | 8.17 (s)                                                                                                               | 8.20 (s)                                                                                              |
| C15                      | 4.13 (q, <i>J</i> = 6.9)                                                                                               | 4.14 (q, <i>J</i> = 6.5)                                                                              |
| C16                      | -                                                                                                                      | -                                                                                                     |
| C17                      | 1.21 (d, <i>J</i> = 6.9)                                                                                               | 1.23 (d, <i>J</i> = 6.9)                                                                              |
| N1'                      | 10.79 (d, <i>J</i> = 1.9)                                                                                              | 10.81 (s)                                                                                             |
| C2'                      | 7.17 (d, <i>J</i> = 2.2)                                                                                               | 7.19 (d, <i>J</i> = 1.8)                                                                              |
| C3'                      | -                                                                                                                      | -                                                                                                     |
| C4'                      | -                                                                                                                      | -                                                                                                     |
| C5'                      | 7.55 (d, <i>J</i> = 8.3)                                                                                               | 7.56 (d, <i>J</i> = 8.4)                                                                              |
| C6'                      | 6.98 (d, <i>J</i> = 8.2)                                                                                               | 7.04–6.95 (m)                                                                                         |
| C7'                      | -                                                                                                                      | -                                                                                                     |
| C8'                      | 7.27 (d, <i>J</i> = 1.2)                                                                                               | 7.28 (s)                                                                                              |
| C9'                      | -                                                                                                                      | -                                                                                                     |
| N10'                     | 7.68 (s)                                                                                                               | 7.71 (s)                                                                                              |
| C11'                     | 4.27 (br-t, <i>J</i> = 5.2)                                                                                            | 4.28 (app-t, <i>J</i> = 4.9)                                                                          |
| C12'                     | 3.21 (dd, <i>J</i> = 4.8, 15.0)<br>3.03 (dd, <i>J</i> = 5.8, 14.9)                                                     | 3.30–3.18 (m)<br>3.14–3.00 (m)                                                                        |
| C13'                     | -                                                                                                                      | -                                                                                                     |
| N14'                     | -                                                                                                                      | -                                                                                                     |
| C15'                     | 4.06 (dd, <i>J</i> = 7.5, 10.0)                                                                                        | 4.06 (app-t, <i>J</i> = 7.8)                                                                          |
| C16'                     | -                                                                                                                      | -                                                                                                     |
| C17'                     | 1.96 (m)<br>1.40 (m)                                                                                                   | 2.03–1.94 (m)<br>1.47–1.36 (m)                                                                        |
| C18'                     | 1.67 (m)<br>1.61 (m)                                                                                                   | 1.74–1.56 (m)                                                                                         |
| C19'                     | 3.34 (m)<br>3.25 (m)                                                                                                   | 3.41–3.29 (m)<br>3.30–3.18 (m)                                                                        |

**Table S3. Comparison of our data for (+)-Naseeseazine A (1) with literature:**

| Assignment <sup>11</sup> | Raju et al. Report <sup>4,12</sup><br>(+)-Naseeseazine A (1)<br><sup>13</sup> C NMR, 151 MHz<br>methanol- <i>d</i> <sub>4</sub> | This Work<br>(+)-Naseeseazine A (1)<br><sup>13</sup> C NMR, 126 MHz<br>methanol- <i>d</i> <sub>4</sub> , 20 °C | Chemical Shift Difference<br>$\Delta\delta$<br>$\delta$ (this work) – $\delta$ (Raju et.<br>al. report) |
|--------------------------|---------------------------------------------------------------------------------------------------------------------------------|----------------------------------------------------------------------------------------------------------------|---------------------------------------------------------------------------------------------------------|
| C2                       | 87.1                                                                                                                            | 87.3                                                                                                           | 0.2                                                                                                     |
| C3                       | 61.2                                                                                                                            | 61.4                                                                                                           | 0.2                                                                                                     |
| C4                       | 135.8                                                                                                                           | 136.1                                                                                                          | 0.3                                                                                                     |
| C5                       | 124.9                                                                                                                           | 125.1                                                                                                          | 0.2                                                                                                     |
| C6                       | 120.2                                                                                                                           | 120.6                                                                                                          | 0.4                                                                                                     |
| C7                       | 129.2                                                                                                                           | 129.6                                                                                                          | 0.4                                                                                                     |
| C8                       | 110.9                                                                                                                           | 111.2                                                                                                          | 0.3                                                                                                     |
| C9                       | 149.1                                                                                                                           | 149.3                                                                                                          | 0.2                                                                                                     |
| C11                      | 60.2                                                                                                                            | 60.5                                                                                                           | 0.3                                                                                                     |
| C12                      | 39.7                                                                                                                            | 39.9                                                                                                           | 0.2                                                                                                     |
| C13                      | 172.6                                                                                                                           | 172.7                                                                                                          | 0.1                                                                                                     |
| C15                      | 52.1                                                                                                                            | 52.4                                                                                                           | 0.3                                                                                                     |
| C16                      | 170.6                                                                                                                           | 170.9                                                                                                          | 0.3                                                                                                     |
| C17                      | 15.2                                                                                                                            | 15.4                                                                                                           | 0.2                                                                                                     |
| C2'                      | 126.2                                                                                                                           | 126.6                                                                                                          | 0.4                                                                                                     |
| C3'                      | 109.5                                                                                                                           | 109.7                                                                                                          | 0.2                                                                                                     |
| C4'                      | 127.6                                                                                                                           | 127.8                                                                                                          | 0.2                                                                                                     |
| C5'                      | 120.3                                                                                                                           | 120.5                                                                                                          | 0.2                                                                                                     |
| C6'                      | 119.5                                                                                                                           | 119.7                                                                                                          | 0.2                                                                                                     |
| C7'                      | 137.2                                                                                                                           | 137.3                                                                                                          | 0.1                                                                                                     |
| C8'                      | 110.1                                                                                                                           | 110.4                                                                                                          | 0.3                                                                                                     |
| C9'                      | 137.9                                                                                                                           | 138.1                                                                                                          | 0.2                                                                                                     |
| C11'                     | 57.2                                                                                                                            | 57.4                                                                                                           | 0.2                                                                                                     |
| C12'                     | 29.0                                                                                                                            | 29.3                                                                                                           | 0.3                                                                                                     |
| C13'                     | 167.3                                                                                                                           | 167.5                                                                                                          | 0.2                                                                                                     |
| C15'                     | 60.0                                                                                                                            | 60.2                                                                                                           | 0.2                                                                                                     |
| C16'                     | 170.6                                                                                                                           | 170.9                                                                                                          | 0.3                                                                                                     |
| C17'                     | 29.0                                                                                                                            | 29.3                                                                                                           | 0.3                                                                                                     |
| C18'                     | 22.5                                                                                                                            | 22.7                                                                                                           | 0.2                                                                                                     |
| C19'                     | 45.8                                                                                                                            | 46.1                                                                                                           | 0.3                                                                                                     |



**Table S4. Comparison of our data for (+)-Naseseazine B (2) with literature:**

| Assignment <sup>11</sup> | Raju et al. Report <sup>4,12</sup><br>(+)-Naseseazine B (2)<br><sup>1</sup> H NMR, 600 MHz, methanol- <i>d</i> <sub>4</sub> | This Work<br>(+)-Naseseazine B (2)<br><sup>1</sup> H NMR, 500 MHz, methanol- <i>d</i> <sub>4</sub> , 20 °C |
|--------------------------|-----------------------------------------------------------------------------------------------------------------------------|------------------------------------------------------------------------------------------------------------|
| N1                       | -                                                                                                                           | -                                                                                                          |
| C2                       | 5.85 (s)                                                                                                                    | 5.84 (s)                                                                                                   |
| C3                       | -                                                                                                                           | -                                                                                                          |
| C4                       | -                                                                                                                           | -                                                                                                          |
| C5                       | 6.84 (dt, <i>J</i> = 0.9, 7.2)                                                                                              | 6.83 (d, <i>J</i> = 7.2)                                                                                   |
| C6                       | 6.68 (t, <i>J</i> = 7.6)                                                                                                    | 6.68 (app-t, <i>J</i> = 7.3)                                                                               |
| C7                       | 7.06 (dt, <i>J</i> = 1.3, 7.6)                                                                                              | 7.06 (app-dt, <i>J</i> = 1.2, 7.9)                                                                         |
| C8                       | 6.69 (d, <i>J</i> = 7.6)                                                                                                    | 6.69 (d, <i>J</i> = 7.7)                                                                                   |
| C9                       | -                                                                                                                           | -                                                                                                          |
| N10                      | -                                                                                                                           | -                                                                                                          |
| C11                      | 4.75 (dd, <i>J</i> = 8.7, 10.2)                                                                                             | 4.71 (app-t, <i>J</i> = 8.6)                                                                               |
| C12                      | 3.27 (m)<br>2.59 (dd, <i>J</i> = 10.2, 13.8)                                                                                | 3.35–3.21 (m)<br>2.57 (dd, <i>J</i> = 10.2, 13.7)                                                          |
| C13                      | -                                                                                                                           | -                                                                                                          |
| N14                      | -                                                                                                                           | -                                                                                                          |
| C15                      | 4.33 (dd, <i>J</i> = 7.1, 9.5)                                                                                              | 4.29 (app-t, <i>J</i> = 7.7)                                                                               |
| C16                      | -                                                                                                                           | -                                                                                                          |
| C17                      | 2.28 (m)<br>2.11 (m)                                                                                                        | 2.30–2.22 (m)<br>2.15–2.04 (m)                                                                             |
| C18                      | 2.00 (m)<br>1.95 (m)                                                                                                        | 2.04–1.87 (m)<br>2.04–1.87 (m)                                                                             |
| C19                      | 3.49 (m)<br>3.44 (m)                                                                                                        | 3.52–3.37 (m)<br>3.52–3.37 (m)                                                                             |
| N1'                      | -                                                                                                                           | -                                                                                                          |
| C2'                      | 7.12 (s)                                                                                                                    | 7.12 (s)                                                                                                   |
| C3'                      | -                                                                                                                           | -                                                                                                          |
| C4'                      | -                                                                                                                           | -                                                                                                          |
| C5'                      | 7.58 (d, <i>J</i> = 8.4)                                                                                                    | 7.57 (d, <i>J</i> = 7.4)                                                                                   |
| C6'                      | 7.03 (dd, <i>J</i> = 1.8, 8.4)                                                                                              | 7.01 (dd, <i>J</i> = 1.6, 8.5)                                                                             |
| C7'                      | -                                                                                                                           | -                                                                                                          |
| C8'                      | 7.41 (d, <i>j</i> = 1.4)                                                                                                    | 7.41 (d, <i>J</i> = 1.3)                                                                                   |
| C9'                      | -                                                                                                                           | -                                                                                                          |
| N10'                     | -                                                                                                                           | -                                                                                                          |
| C11'                     | 4.40 (br-t, <i>J</i> = 4.7)                                                                                                 | 4.39 (app-t, <i>J</i> = 4.6)                                                                               |
| C12'                     | 3.32 (m)<br>3.28 (m)                                                                                                        | 3.35–3.21 (m)<br>3.35–3.21 (m)                                                                             |
| C13'                     | -                                                                                                                           | -                                                                                                          |
| N14'                     | -                                                                                                                           | -                                                                                                          |
| C15'                     | 3.99 (ddd, <i>J</i> = 1.6, 6.6, 11.4)                                                                                       | 3.98 (ddd, <i>J</i> = 1.4, 6.3, 10.7)                                                                      |
| C16'                     | -                                                                                                                           | -                                                                                                          |
| C17'                     | 1.97 (m)<br>0.92 (m)                                                                                                        | 2.04–1.87 (m)<br>0.97–0.87 (m)                                                                             |
| C18'                     | 1.67 (m)<br>1.44 (m)                                                                                                        | 1.73–1.60 (m)<br>1.49–1.40 (m)                                                                             |
| C19'                     | 3.43 (m)<br>3.24 (m)                                                                                                        | 3.52–3.37 (m)<br>3.35–3.21 (m)                                                                             |

**Table S5. Comparison of our data for (+)-Naseseazine B (2) with literature:**

| Assignment <sup>11</sup> | Raju et al. Report <sup>4,12</sup><br>(+)-Naseseazine B (2)<br><sup>1</sup> H NMR, 600 MHz, DMSO- <i>d</i> <sub>6</sub> | This Work<br>(+)-Naseseazine B (2)<br><sup>1</sup> H NMR, 500 MHz, DMSO- <i>d</i> <sub>6</sub> , 20 °C |
|--------------------------|-------------------------------------------------------------------------------------------------------------------------|--------------------------------------------------------------------------------------------------------|
| N1                       | 6.75 (d, <i>J</i> = 3.2)                                                                                                | 6.82–6.76 (m)                                                                                          |
| C2                       | 5.65 (d, <i>J</i> = 3.2)                                                                                                | 5.68 (d, <i>J</i> = 3.2)                                                                               |
| C3                       | -                                                                                                                       | -                                                                                                      |
| C4                       | -                                                                                                                       | -                                                                                                      |
| C5                       | 6.82 (d, <i>J</i> = 7.3)                                                                                                | 6.82–6.76 (m)                                                                                          |
| C6                       | 6.58 (dt, <i>J</i> = 0.9, 7.4)                                                                                          | 6.58 (app-dt, <i>J</i> = 1.0, 7.5)                                                                     |
| C7                       | 7.00 (t, <i>J</i> = 7.2)                                                                                                | 7.00 (app-dt, <i>J</i> = 1.3, 7.9)                                                                     |
| C8                       | 6.61 (d, <i>J</i> = 7.8)                                                                                                | 6.60 (d, <i>J</i> = 7.6)                                                                               |
| C9                       | -                                                                                                                       | -                                                                                                      |
| N10                      | -                                                                                                                       | -                                                                                                      |
| C11                      | 4.71 (dd, <i>J</i> = 7.5, 10.5)                                                                                         | 4.72 (app-t, <i>J</i> = 8.2)                                                                           |
| C12                      | 3.12 (dd, <i>J</i> = 7.5, 13.6)<br>2.36 (dd, <i>J</i> = 10.5, 13.6)                                                     | 3.13 (dd, <i>J</i> = 7.4, 13.6)<br>2.36 (dd, <i>J</i> = 10.5, 13.6)                                    |
| C13                      | -                                                                                                                       | -                                                                                                      |
| N14                      | -                                                                                                                       | -                                                                                                      |
| C15                      | 4.34 (t, <i>J</i> = 8.0)                                                                                                | 4.35 (app-t, <i>J</i> = 7.9)                                                                           |
| C16                      | -                                                                                                                       | -                                                                                                      |
| C17                      | 2.15 (m)<br>1.95 (m)                                                                                                    | 2.21–2.11 (m)<br>2.03–1.91 (m)                                                                         |
| C18                      | 1.85 (m)                                                                                                                | 1.91–1.77 (m)                                                                                          |
| C19                      | 3.34 (m)                                                                                                                | 3.41–3.30 (m)                                                                                          |
| N1'                      | 10.80 (d, <i>J</i> = 1.8)                                                                                               | 10.81 (s)                                                                                              |
| C2'                      | 7.18 (d, <i>J</i> = 2.2)                                                                                                | 7.19 (d, <i>J</i> = 2.2)                                                                               |
| C3'                      | -                                                                                                                       | -                                                                                                      |
| C4'                      | -                                                                                                                       | -                                                                                                      |
| C5'                      | 7.56 (d, <i>J</i> = 8.4)                                                                                                | 7.57 (d, <i>J</i> = 8.4)                                                                               |
| C6'                      | 6.98 (dd, <i>J</i> = 1.5, 8.4)                                                                                          | 6.99 (d, <i>J</i> = 8.6)                                                                               |
| C7'                      | -                                                                                                                       | -                                                                                                      |
| C8'                      | 7.29 (d, <i>J</i> = 1.5)                                                                                                | 7.30 (d, <i>J</i> = 1.3)                                                                               |
| C9'                      | -                                                                                                                       | -                                                                                                      |
| N10'                     | 7.67 (s)                                                                                                                | 7.71 (s)                                                                                               |
| C11'                     | 4.27 (br-t, <i>J</i> = 5.1)                                                                                             | 4.29 (app-t, <i>J</i> = 5.1)                                                                           |
| C12'                     | 3.20 (dd, <i>J</i> = 4.5, 15.0)<br>3.04 (dd, <i>J</i> = 6.0, 15.0)                                                      | 3.22 (dd, <i>J</i> = 4.6, 14.6)<br>3.05 (dd, <i>J</i> = 5.8, 14.8)                                     |
| C13'                     | -                                                                                                                       | -                                                                                                      |
| N14'                     | -                                                                                                                       | -                                                                                                      |
| C15'                     | 4.06 (dd, <i>J</i> = 7.6, 9.0)                                                                                          | 4.06 (app-t, <i>J</i> = 8.7)                                                                           |
| C16'                     | -                                                                                                                       | -                                                                                                      |
| C17'                     | 1.97 (m)<br>1.41 (m)                                                                                                    | 2.03–1.91 (m)<br>1.48–1.36 (m)                                                                         |
| C18'                     | 1.68 (m)<br>1.62 (m)                                                                                                    | 1.75–1.56 (m)                                                                                          |
| C19'                     | 3.34 (m)<br>3.24 (m)                                                                                                    | 3.41–3.30 (m)<br>3.29–3.24 (m)                                                                         |

**Table S6. Comparison of our data for (+)-Naseseazine B (2) with literature:**

| Assignment <sup>11</sup> | Raju et al. Report <sup>4,12</sup><br>(+)-Naseseazine B (2)<br><sup>13</sup> C NMR, 151 MHz<br>methanol- <i>d</i> <sub>4</sub> | This Work<br>(+)-Naseseazine B (2)<br><sup>13</sup> C NMR, 126 MHz<br>methanol- <i>d</i> <sub>4</sub> , 20 °C | Chemical Shift Difference<br>$\Delta\delta$<br>$\delta$ (this work) – $\delta$ (Raju et.<br>al. report) |
|--------------------------|--------------------------------------------------------------------------------------------------------------------------------|---------------------------------------------------------------------------------------------------------------|---------------------------------------------------------------------------------------------------------|
| C2                       | 86.8                                                                                                                           | 87.1                                                                                                          | 0.3                                                                                                     |
| C3                       | 61.7                                                                                                                           | 61.9                                                                                                          | 0.2                                                                                                     |
| C4                       | 136.0                                                                                                                          | 136.2                                                                                                         | 0.2                                                                                                     |
| C5                       | 124.8                                                                                                                          | 125.1                                                                                                         | 0.3                                                                                                     |
| C6                       | 120.3                                                                                                                          | 120.6                                                                                                         | 0.3                                                                                                     |
| C7                       | 129.1                                                                                                                          | 129.6                                                                                                         | 0.5                                                                                                     |
| C8                       | 111.0                                                                                                                          | 111.3                                                                                                         | 0.3                                                                                                     |
| C9                       | 149.0                                                                                                                          | 149.3                                                                                                         | 0.3                                                                                                     |
| C11                      | 61.3                                                                                                                           | 61.7                                                                                                          | 0.4                                                                                                     |
| C12                      | 39.5                                                                                                                           | 39.7                                                                                                          | 0.2                                                                                                     |
| C13                      | 168.4                                                                                                                          | 168.6                                                                                                         | 0.2                                                                                                     |
| C15                      | 61.8                                                                                                                           | 61.9                                                                                                          | 0.1                                                                                                     |
| C16                      | 170.2                                                                                                                          | 170.3                                                                                                         | 0.1                                                                                                     |
| C17                      | 28.3                                                                                                                           | 28.6                                                                                                          | 0.3                                                                                                     |
| C18                      | 24.1                                                                                                                           | 24.4                                                                                                          | 0.3                                                                                                     |
| C19                      | 45.9                                                                                                                           | 46.4                                                                                                          | 0.5                                                                                                     |
| C2'                      | 126.1                                                                                                                          | 126.6                                                                                                         | 0.5                                                                                                     |
| C3'                      | 109.5                                                                                                                          | 109.8                                                                                                         | 0.3                                                                                                     |
| C4'                      | 127.6                                                                                                                          | 127.8                                                                                                         | 0.2                                                                                                     |
| C5'                      | 120.3                                                                                                                          | 120.6                                                                                                         | 0.3                                                                                                     |
| C6'                      | 119.4                                                                                                                          | 119.8                                                                                                         | 0.4                                                                                                     |
| C7'                      | 136.9                                                                                                                          | 137.2                                                                                                         | 0.3                                                                                                     |
| C8'                      | 110.3                                                                                                                          | 110.5                                                                                                         | 0.2                                                                                                     |
| C9'                      | 137.9                                                                                                                          | 138.1                                                                                                         | 0.2                                                                                                     |
| C11'                     | 57.0                                                                                                                           | 57.3                                                                                                          | 0.3                                                                                                     |
| C12'                     | 29.2                                                                                                                           | 29.3                                                                                                          | 0.1                                                                                                     |
| C13'                     | 167.3                                                                                                                          | 167.5                                                                                                         | 0.2                                                                                                     |
| C15'                     | 59.9                                                                                                                           | 60.2                                                                                                          | 0.3                                                                                                     |
| C16'                     | 170.7                                                                                                                          | 170.9                                                                                                         | 0.2                                                                                                     |
| C17'                     | 29.1                                                                                                                           | 29.3                                                                                                          | 0.2                                                                                                     |
| C18'                     | 22.4                                                                                                                           | 22.7                                                                                                          | 0.3                                                                                                     |
| C19'                     | 45.8                                                                                                                           | 46.1                                                                                                          | 0.3                                                                                                     |

## Marfey's Analysis of (+)-Naseseazine B (2).

Marfey's analysis was performed on synthetic (+)-naseseazine B (2) using the method described in the isolation report.<sup>4</sup> (+)-Naseseazine B (2) (350  $\mu\text{g}$ , 620 nmol, 1 equiv) was dissolved in aqueous hydrochloric acid (6 N, 1.40 mL) and heated to 100 °C in a sealed vial. After 12 h, the reaction mixture was allowed to cool to 23 °C then concentrated under reduced pressure. A solution of 1-fluoro-2,4-dinitrophenyl-5-L-alanine amide (L-FDAA) in acetone (1% w/v, 700  $\mu\text{L}$ ) and aqueous sodium bicarbonate (1 M, 140  $\mu\text{L}$ ) were sequentially added to the residue and the resulting solution was heated to 37 °C. After 1 h, the reaction mixture was allowed to cool to 23 °C and aqueous hydrochloric acid (1 M, 140  $\mu\text{L}$ ) was added. The solution was then diluted with acetonitrile (5.67 mL) and passed through a syringe filter (Acrodisc GHP, 13 mm diameter, 0.45  $\mu\text{m}$  pore size). An aliquot of this solution (10  $\mu\text{L}$ ) was diluted in water (450  $\mu\text{L}$ ) and analyzed by HPLC.

A standard solution of L-Ala-NH<sub>2</sub>-DNP-L-Pro was prepared from L-proline. A solution of L-FDAA in acetone (1% w/v, 100  $\mu\text{L}$ ) and aqueous sodium bicarbonate (1 M, 20  $\mu\text{L}$ ) were sequentially added to an aqueous solution of L-proline (50 mM, 50  $\mu\text{L}$ ). The solution was then heated to 37 °C. After 1 h, the reaction mixture was allowed to cool to 23 °C and aqueous hydrochloric acid (1 M, 20  $\mu\text{L}$ ) was added. The solution was then diluted with isopropanol (810  $\mu\text{L}$ ) and passed through a syringe filter (Acrodisc GHP, 13 mm diameter, 0.45  $\mu\text{m}$  pore size). An aliquot of this solution (1  $\mu\text{L}$ ) was diluted in water (450  $\mu\text{L}$ ) and analyzed by HPLC.

A standard solution of L-Ala-NH<sub>2</sub>-DNP-D-Pro was prepared analogously from D-proline.

HPLC conditions: Waters X-Bridge analytical HPLC column, C18, 5  $\mu\text{m}$ , 4.6  $\times$  250 mm; 2.00 mL/min; gradient, 0%  $\rightarrow$  30% acetonitrile in water, 30 min;  $t_{\text{R}}$ (L-Ala-NH<sub>2</sub>-DNP-L-Pro) = 13.1 min,  $t_{\text{R}}$ (L-Ala-NH<sub>2</sub>-DNP-D-Pro) = 16.0 min. HPLC traces were obtained using UV detection (340 nm) and product identity was further corroborated with HPLC traces of mass spectrometric data (ESI+). See Figure S1 for the HPLC traces of L-FDAA derived (+)-naseseazine B hydrolysate, the corresponding amino acid standards, and their co-injection. The HPLC analysis confirms the presence of L-proline residues in the synthetic samples of (+)-naseseazine B (2) and is consistent with our use of L-proline building blocks en route to the natural product. Marfey's analysis thus lends further support to our stereochemical reassignment of (+)-naseseazine B (2).

Figure S1. Marfey's Analysis of (+)-Nasesezine B (2)

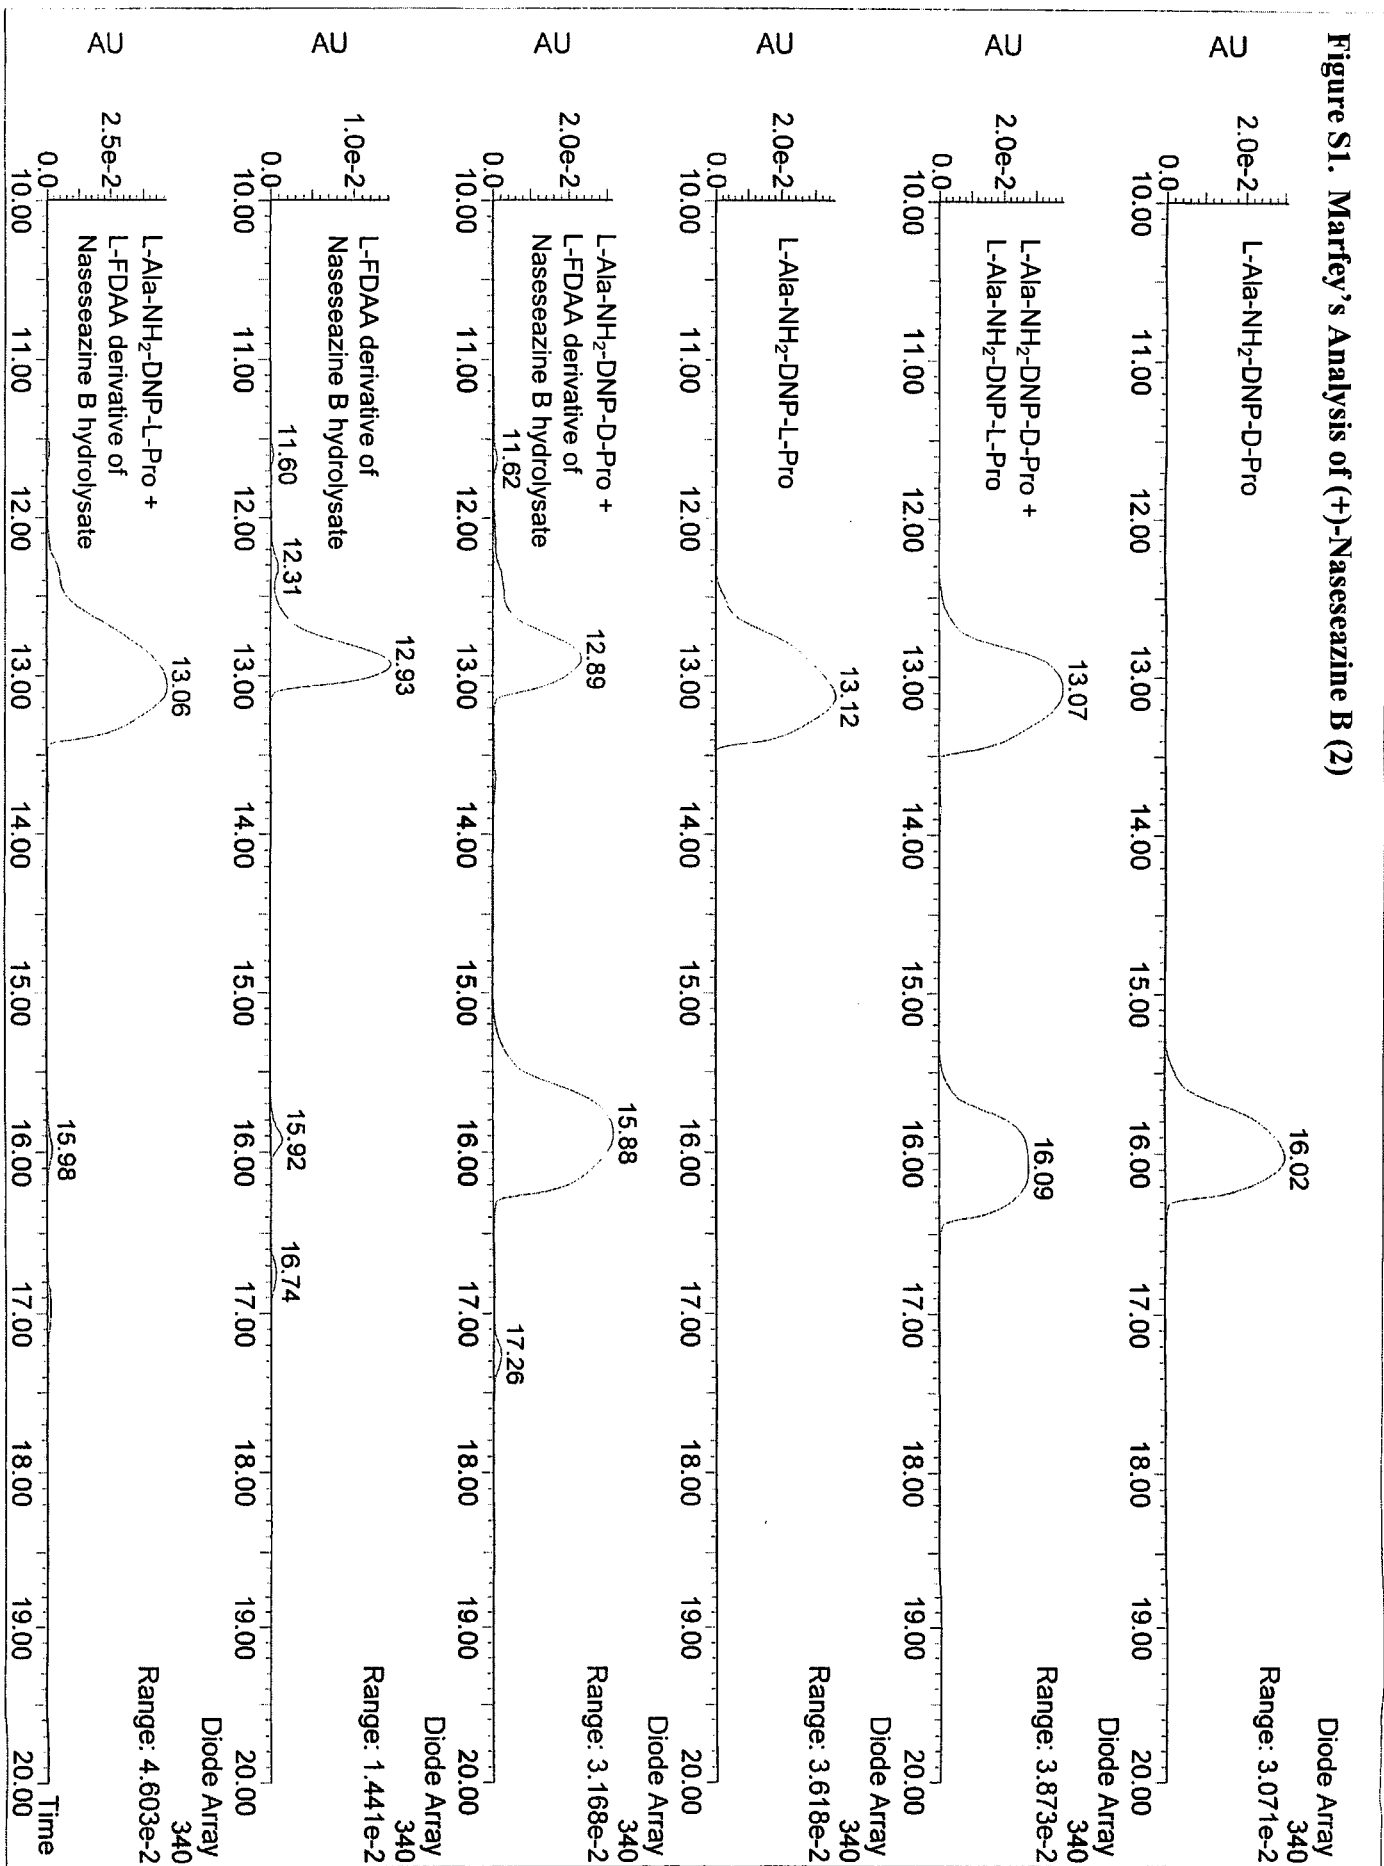

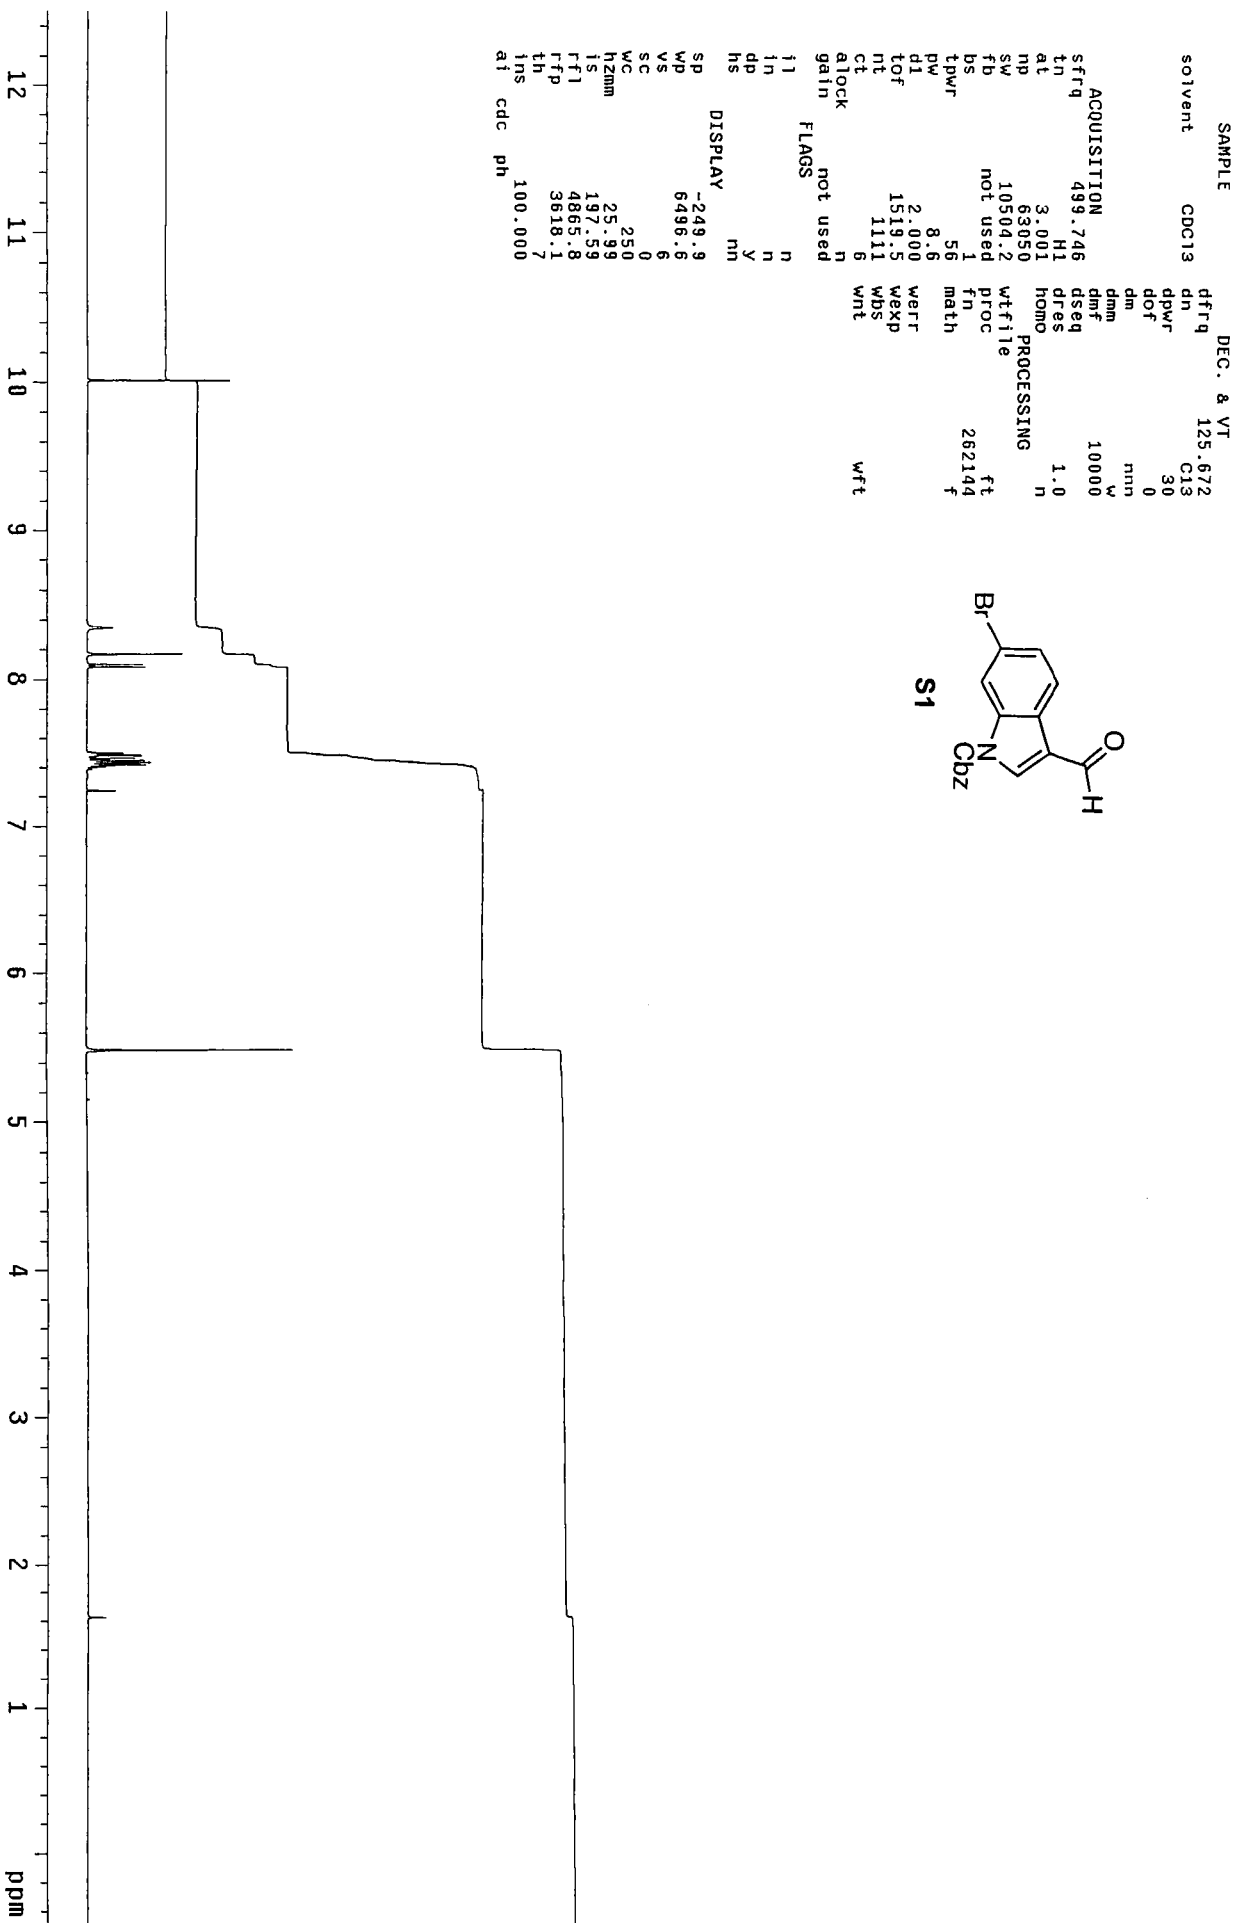

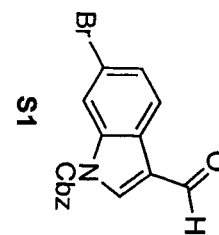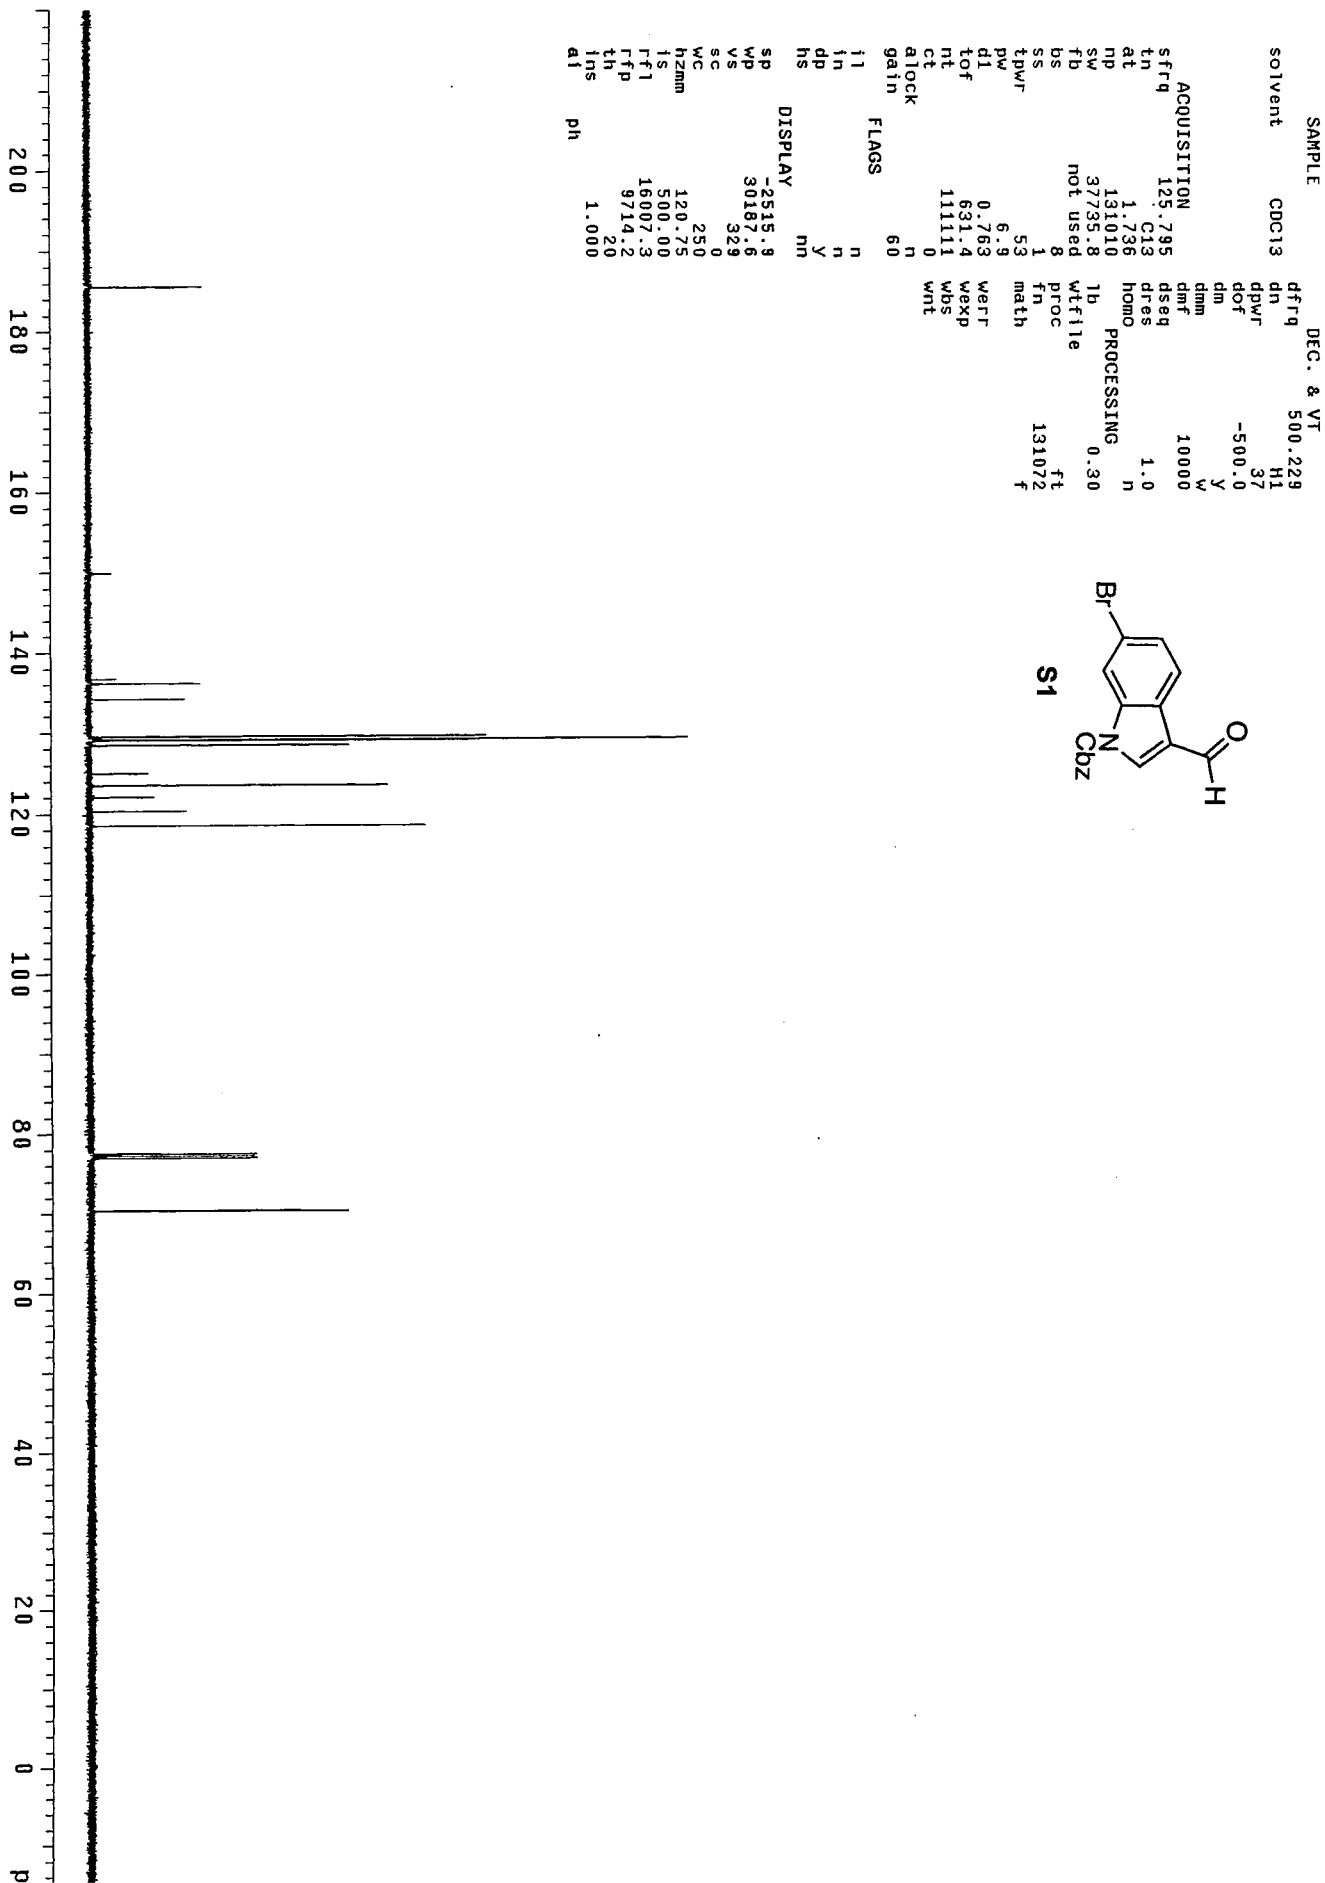

SAMPLE DEC. & VT  
 solvent CDCl<sub>3</sub> dfreq 500.229  
 dn H1  
 dpwr 37  
 dof -500.0  
 dm Y  
 dnm W  
 dmf 10000  
 dseq 1.0  
 dres n  
 homo n  
 PROCESSING 0.30  
 ft  
 fn 131072  
 f

ACQUISITION  
 sfreq 125.795  
 tn C13  
 at 1.736  
 np 131010  
 sw 37/35.8  
 fb not used  
 bs 8  
 ss 1  
 tpwr 53  
 pw 6.9  
 dl 0.763  
 tof 631.4  
 nt 11111  
 ct 0  
 alock n  
 gain 60  
 FLAGS  
 i1 n  
 in n  
 dp Y  
 hs nn

DISPLAY  
 sp -2515.9  
 wp 30187.6  
 vs 329  
 sc 0  
 wc 250  
 hzmm 120.75  
 ls 500.00  
 rfl 16007.3  
 rfp 9714.2  
 th 20  
 ins 1.000  
 ph

PROCESSING  
 math  
 werr  
 wexp  
 wos  
 wnt

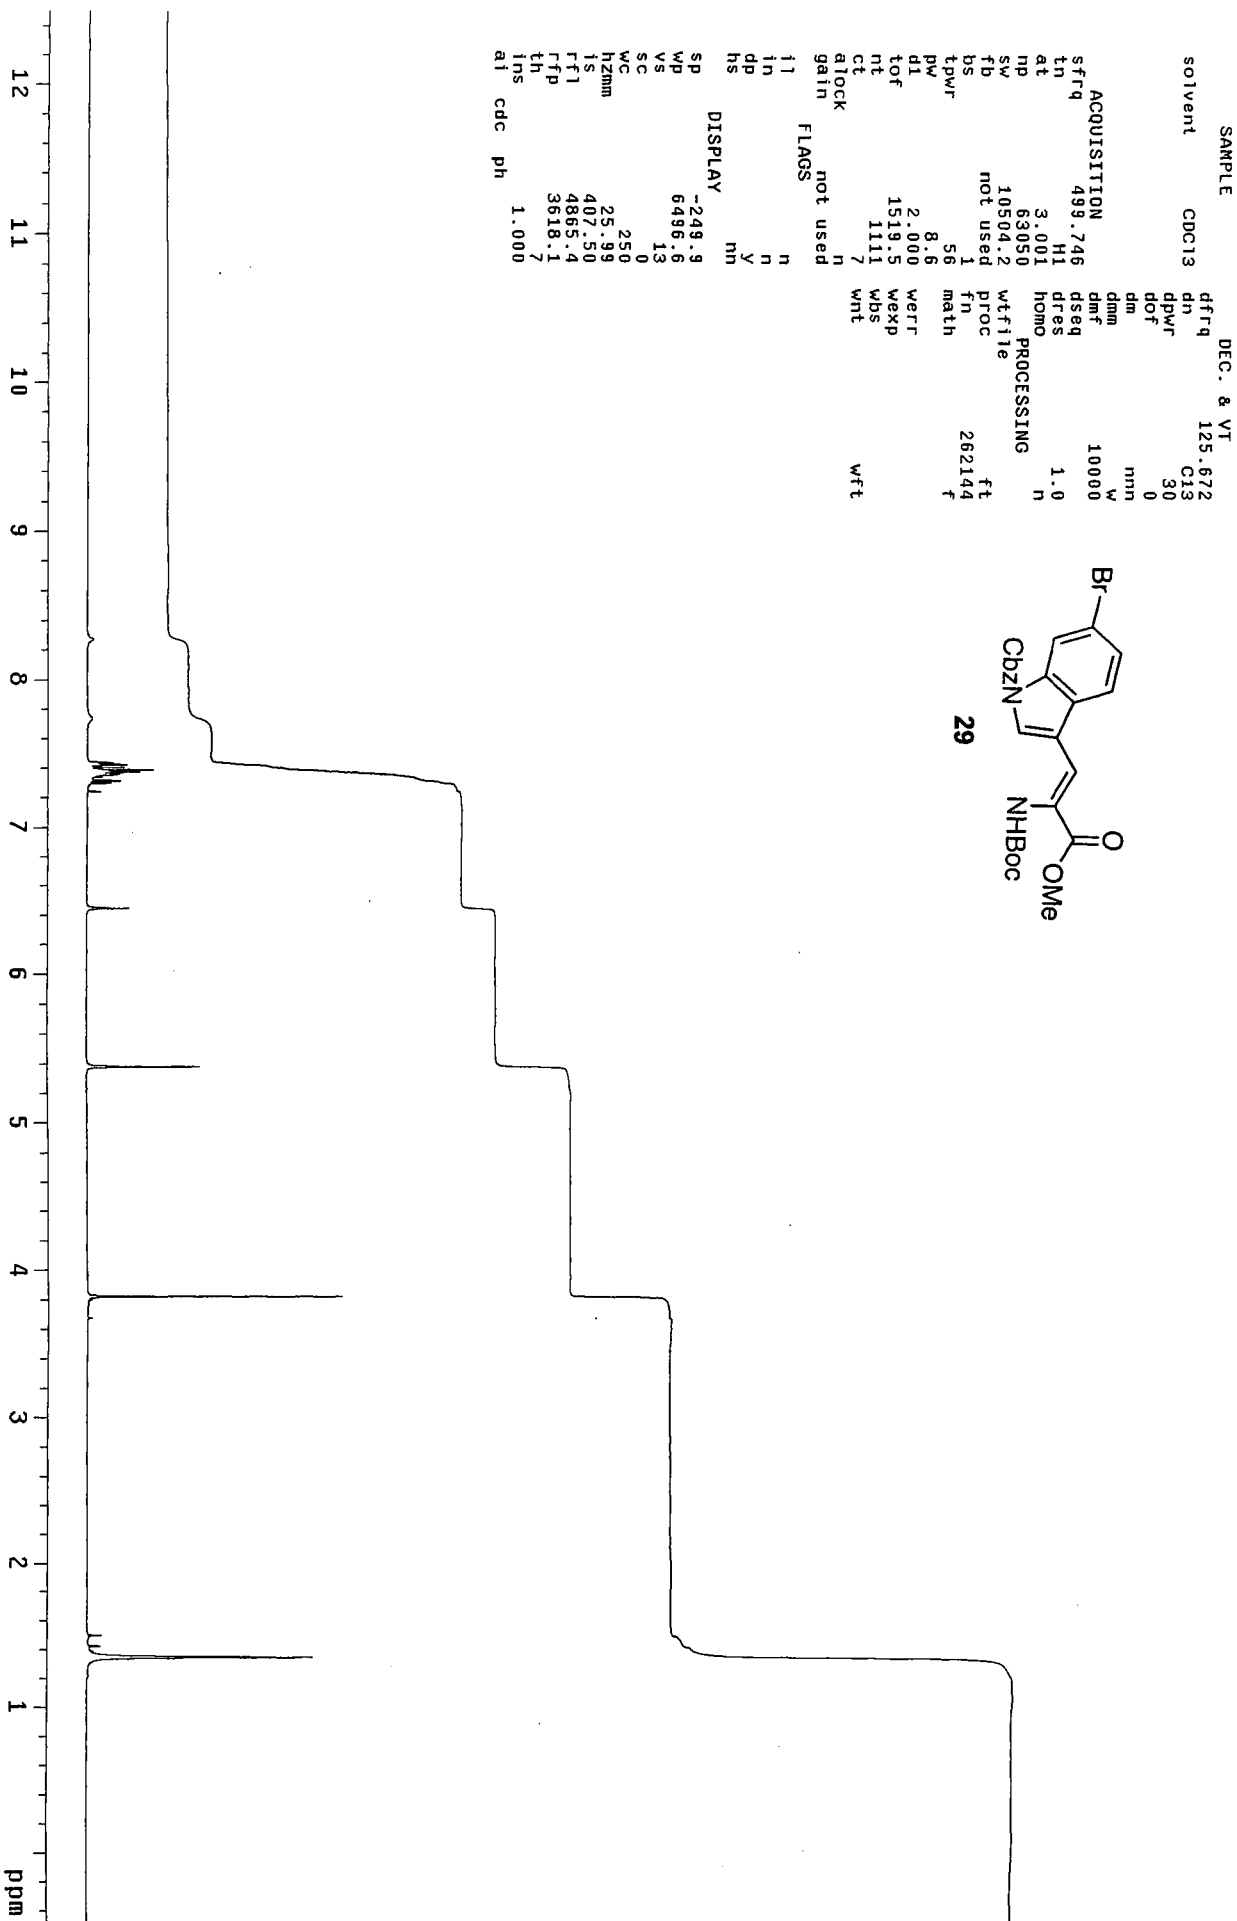



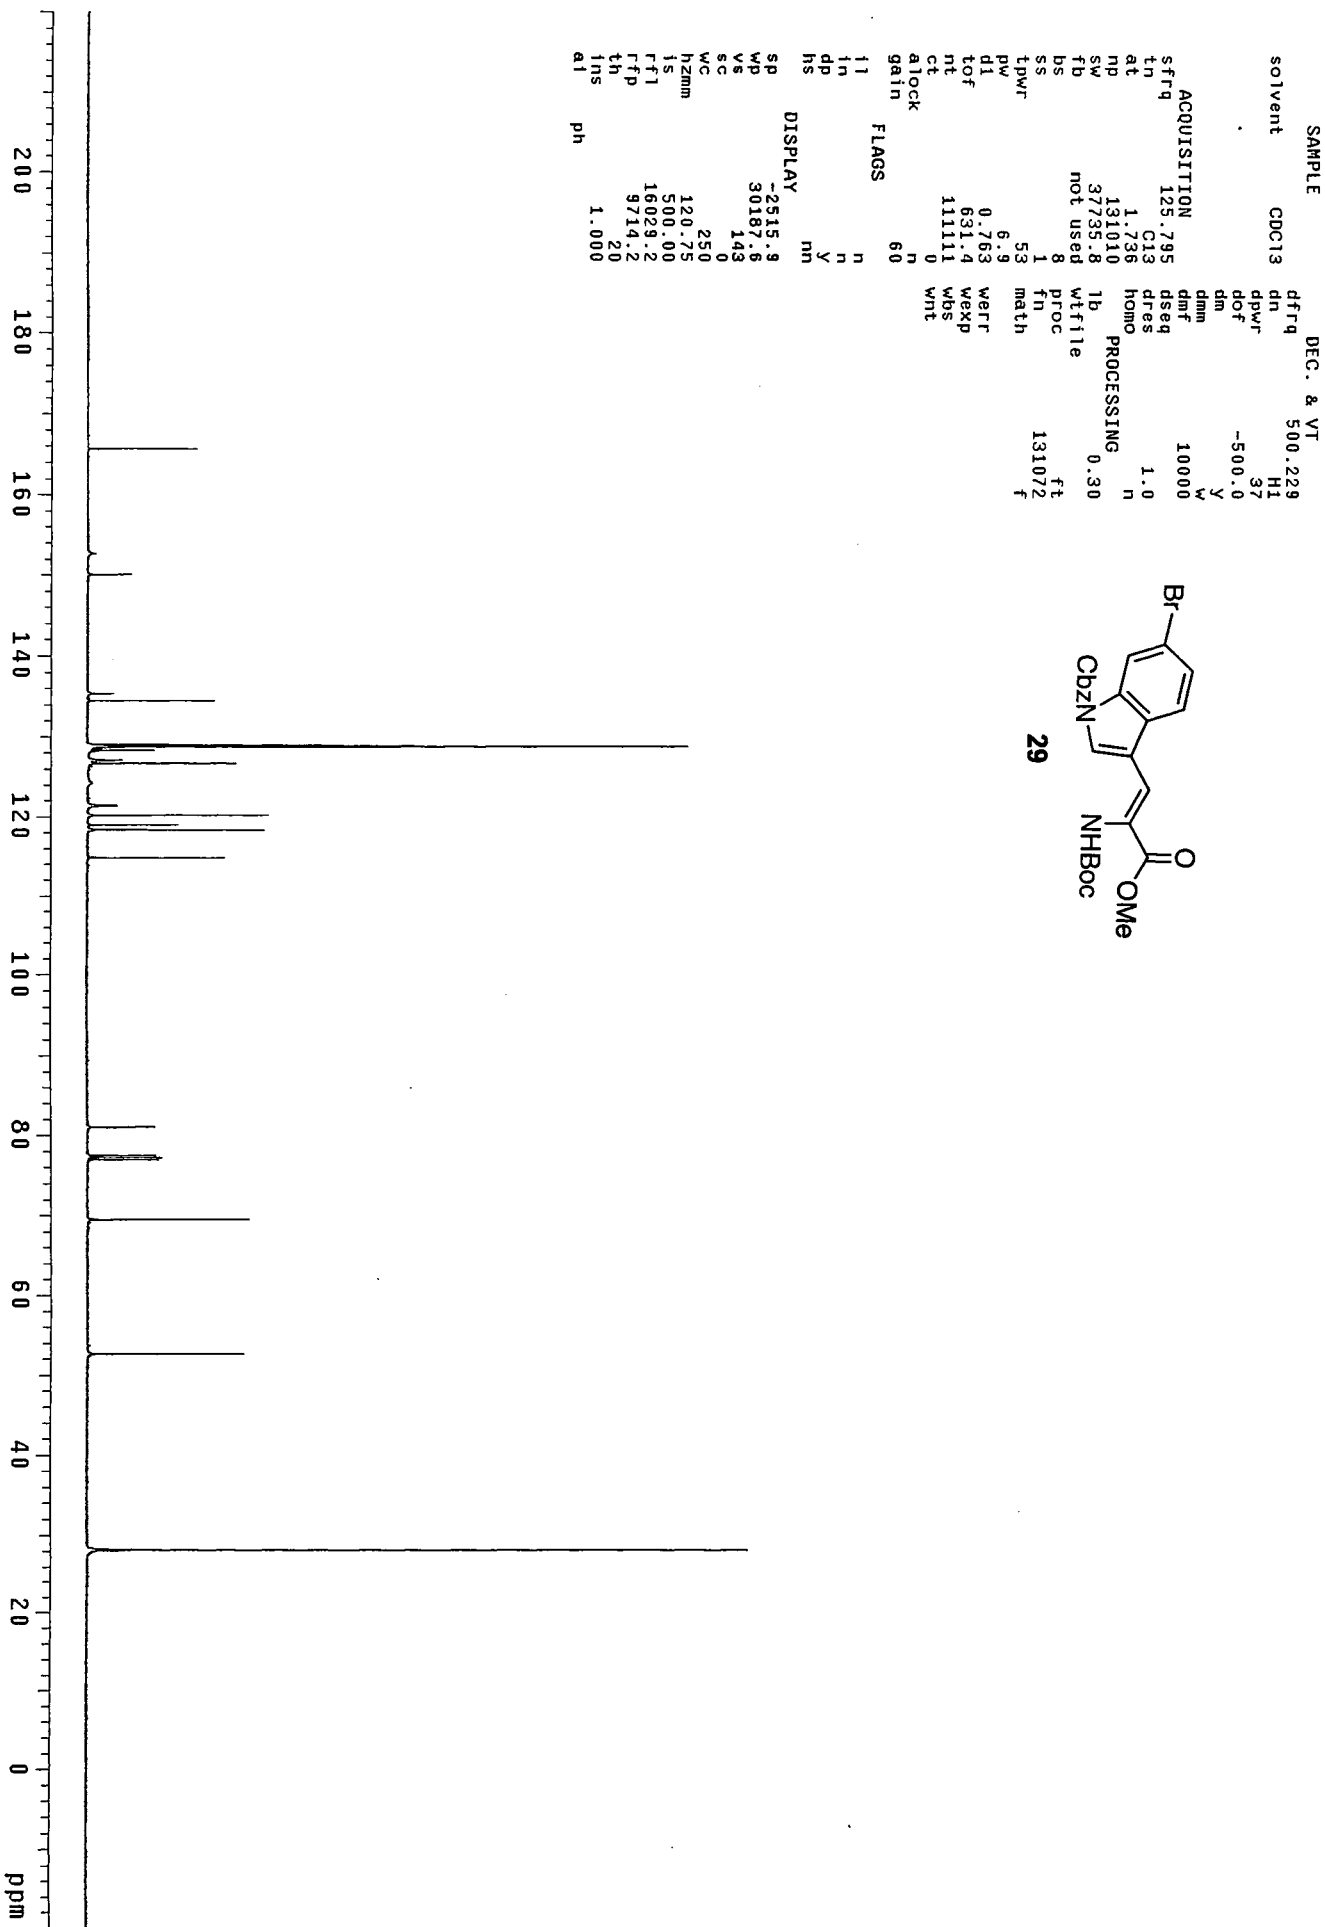

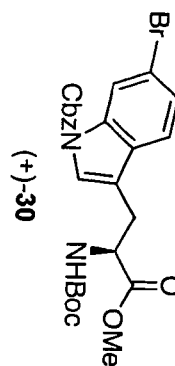

|         |       |           |
|---------|-------|-----------|
| SAMPLE  |       | DEC. & VT |
| solvent | CDCl3 | 125.672   |
|         |       | C13       |
|         |       | 30        |
|         |       | 0         |
|         |       | nmn       |
|         |       | dm        |
|         |       | dim       |
|         |       | dmr       |
|         |       | v         |
|         |       | 10000     |
|         |       | n         |
|         |       | 1.0       |
|         |       | ft        |
|         |       | 252144    |
|         |       | f         |

  

|             |          |            |
|-------------|----------|------------|
| ACQUISITION |          | PROCESsing |
| sfrq        | 499.746  | ft         |
| tn          | H1       | fn         |
| at          | 3.001    | math       |
| np          | 63050    | proc       |
| sw          | 10504.2  | wfile      |
| fb          | not used | fn         |
| bs          | 1        | math       |
| tpwr        | 56       |            |
| pw          | 8.6      |            |
| d1          | 2.000    | verr       |
| tof         | 1519.5   | wexp       |
| nt          | 11111    | wbs        |
| ct          | 8        | wnt        |
| alock       | n        |            |
| gain        | not used | wft        |
| flags       | not used |            |
| l1          | n        |            |
| in          | n        |            |
| dp          | y        |            |
| hs          | nn       |            |

  

|         |         |
|---------|---------|
| DISPLAY |         |
| sp      | -249.9  |
| wp      | 6496.6  |
| ve      | 22      |
| sc      | 250     |
| wc      | 250     |
| hzmm    | 25.99   |
| ts      | 257.77  |
| rfl     | 4865.8  |
| rflp    | 3618.1  |
| th      | 7       |
| ins     | 100.000 |
| ai      | cdc     |
| ph      |         |

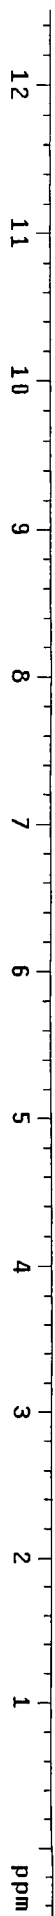

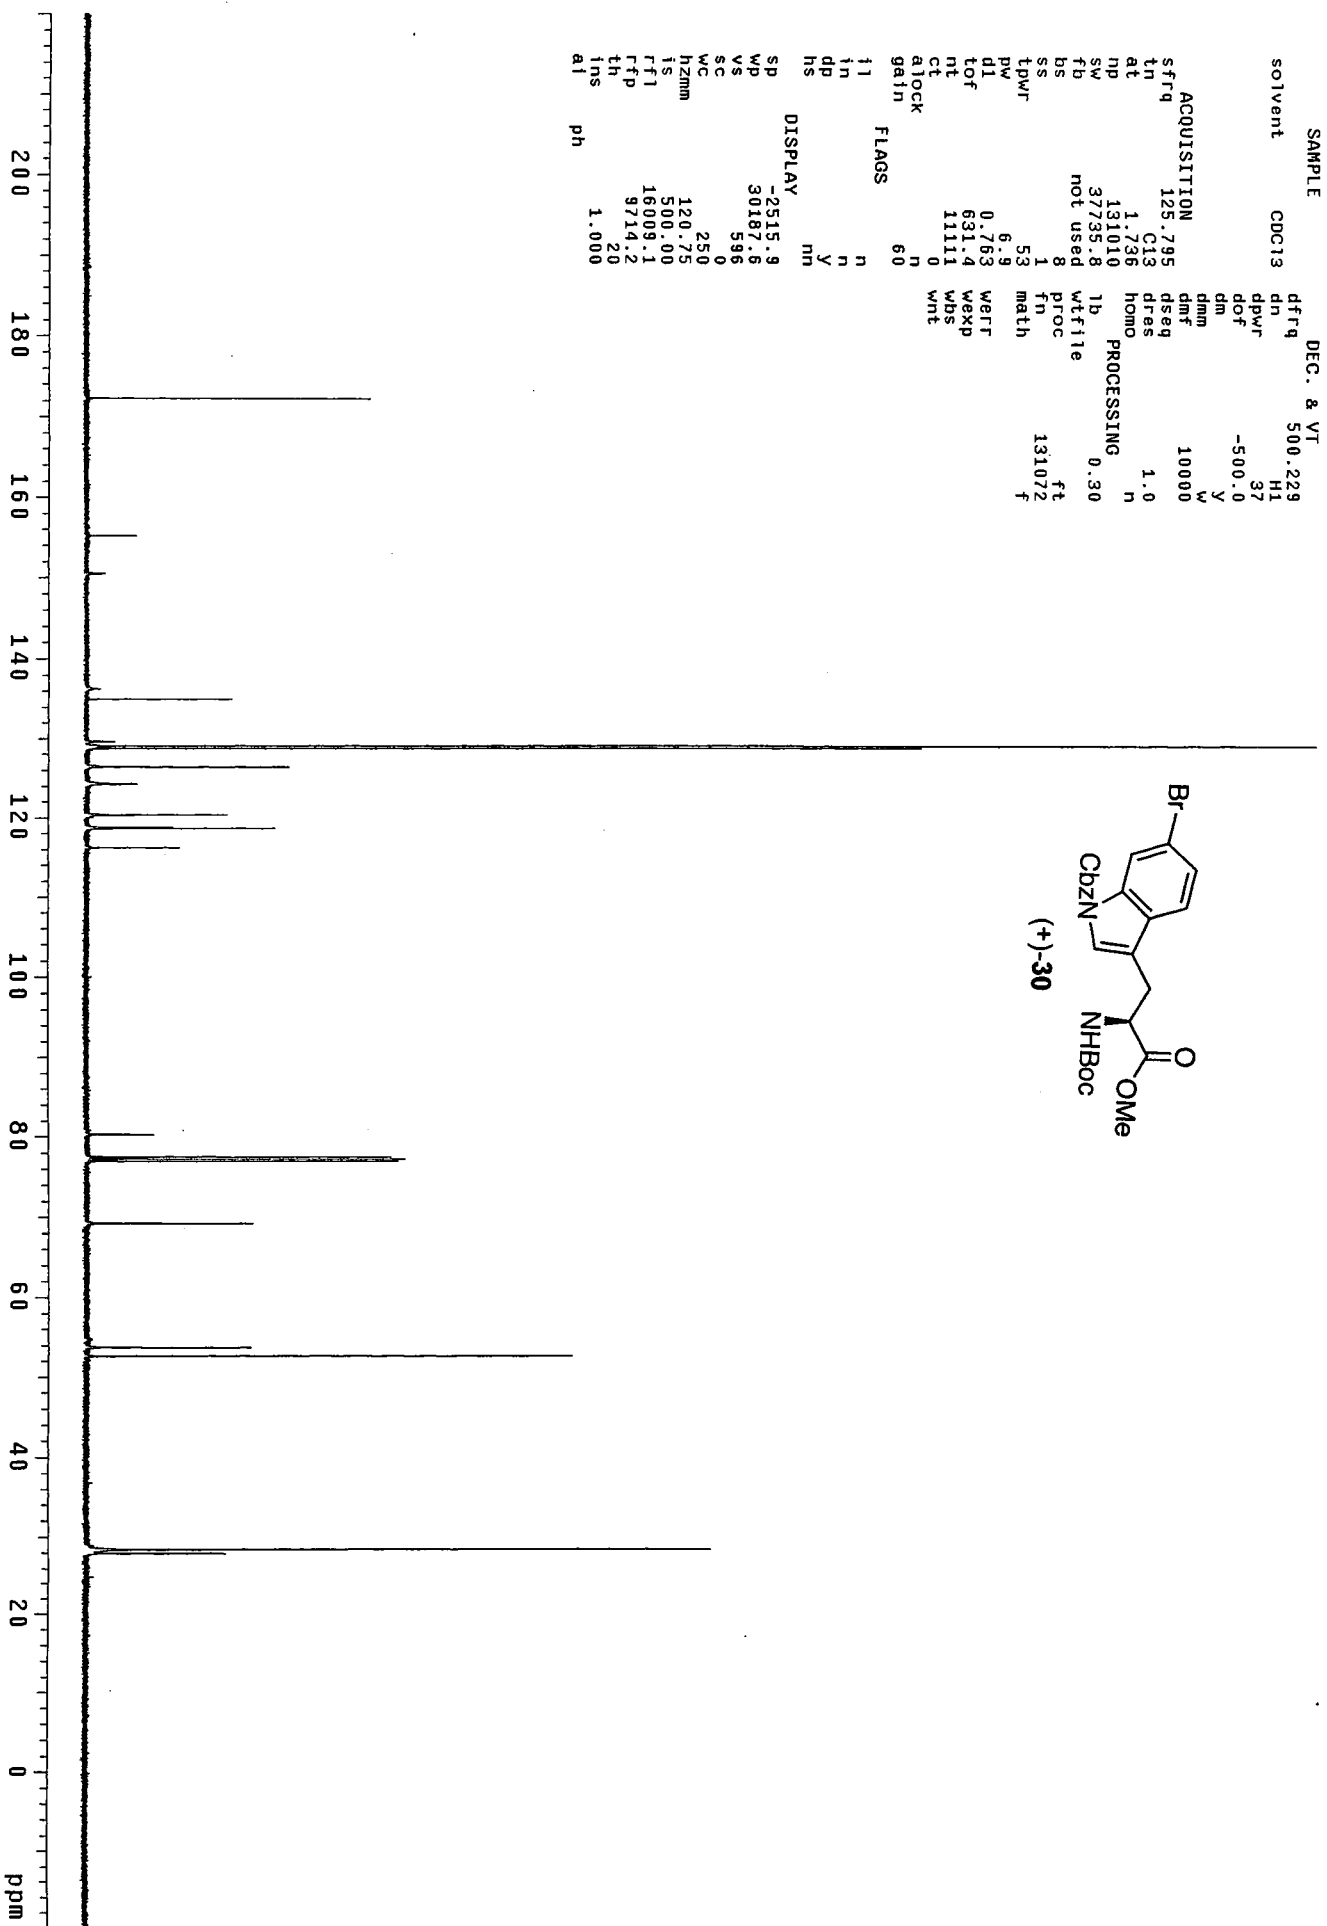

SAMPLE  
solvent CDCl3  
DEC. & VT 500.229  
dfreq 37  
dn H1  
dpwr -500.0  
dof 0  
dm Y  
dmm Y  
dmr 10000  
W  
dseq 1.0  
dres n  
homo 0.30  
PROCESSING  
lb wffile  
wfproc ft  
proc 131072  
f

ACQUISITION  
sfrq 125.795  
tn C13  
at 1.736  
np 131010  
sw 3735.8  
fb not used  
bs 8  
ss 1  
tpwr 53  
pw 6.9  
d1 0.763  
tof 631.4  
nt 11111  
ct 0  
alock n  
gain n  
60

FLAGS  
i1 n  
in n  
dp Y  
hs nm

DISPLAY  
SP 2515.9  
WP 30187.6  
VS 596  
WC 0  
SC 250  
h2mm 120.75  
is 500.00  
rfl 16009.1  
rfp 9714.2  
ins 1.000  
al ph

```
=====
Injection Date   :                               Seq. Line :    1
Sample Name     :                               Location  :
Acq. Operator  :                               Inj       :    1
                                                Inj Volume : 0 µl
Different Inj Volume from Sequence !      Actual Inj Volume : 5 µl
Acq. Method    :
Last changed   :
Analysis Method:
Last changed   :
```

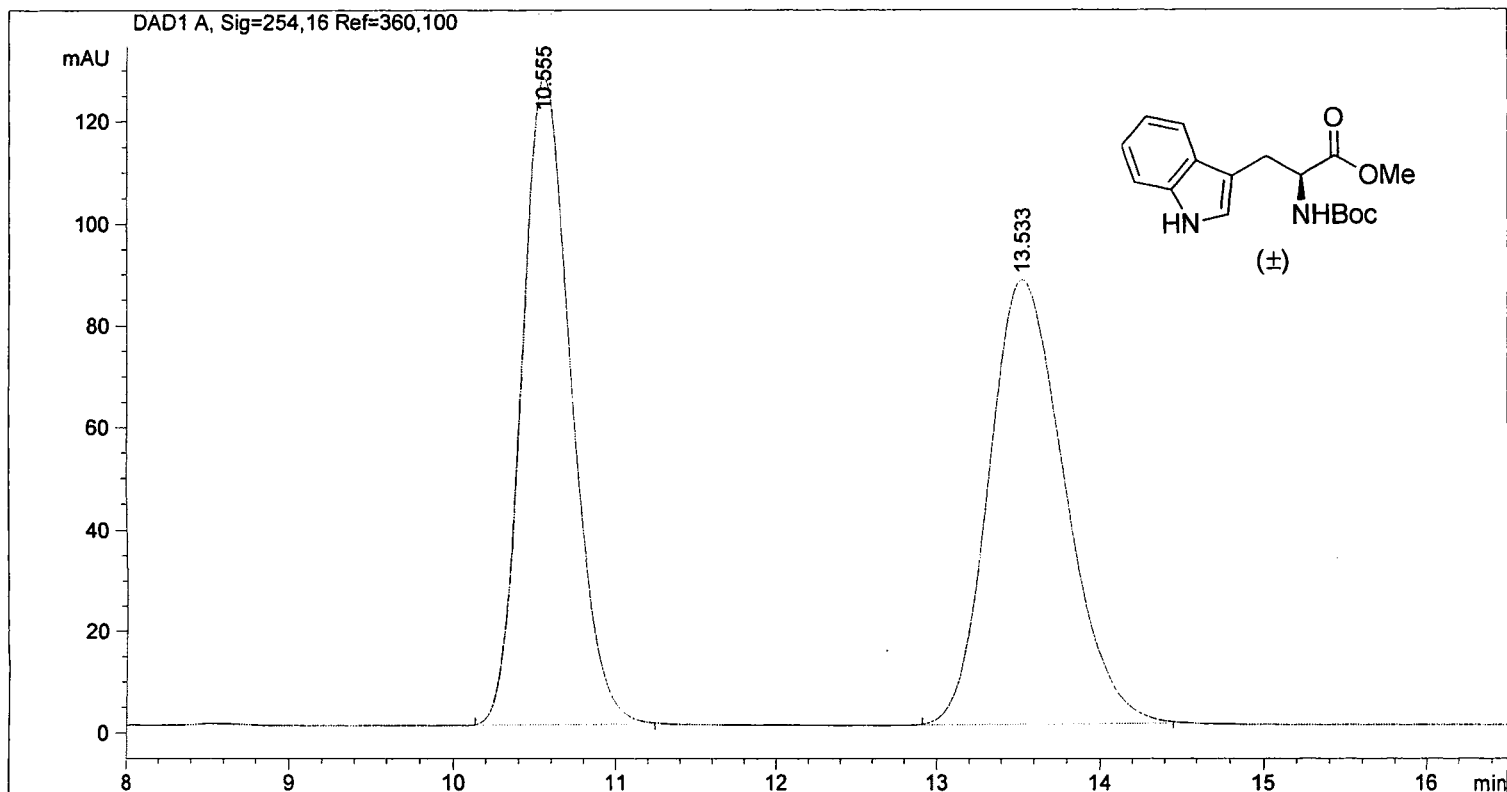

=====  
Area Percent Report  
=====

Sorted By : Signal  
Multiplier : 1.0000  
Dilution : 1.0000  
Use Multiplier & Dilution Factor with ISTDs

Signal 1: DAD1 A, Sig=254,16 Ref=360,100

| Peak # | RetTime [min] | Type | Width [min] | Area [mAU*s] | Height [mAU] | Area %  |
|--------|---------------|------|-------------|--------------|--------------|---------|
| 1      | 10.555        | BB   | 0.3237      | 2673.67554   | 126.95678    | 48.7209 |
| 2      | 13.533        | BB   | 0.4994      | 2814.06738   | 87.21879     | 51.2791 |

Totals : 5487.74292 214.17557

Results obtained with enhanced integrator!

=====  
\*\*\* End of Report \*\*\*

```
=====
Injection Date   :                               Seq. Line :    1
Sample Name     :                               Location  :
Acq. Operator  :                               Inj       :    1
Acq. Method    :
Analysis Method :
Last changed   :
```

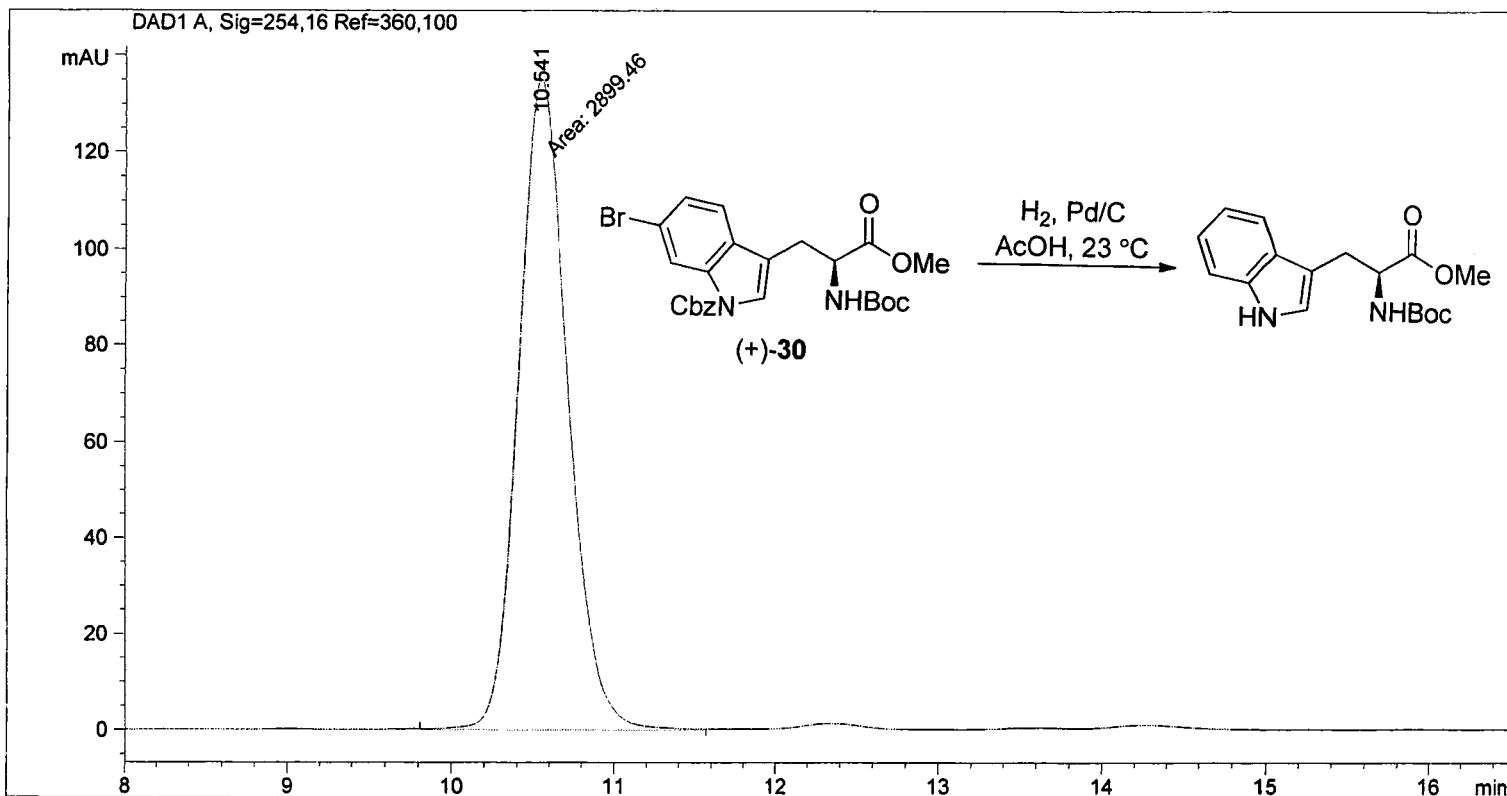

=====  
Area Percent Report  
=====

Sorted By : Signal  
Multiplier : 1.0000  
Dilution : 1.0000  
Use Multiplier & Dilution Factor with ISTDs

Signal 1: DAD1 A, Sig=254,16 Ref=360,100

| Peak # | RetTime [min] | Type | Width [min] | Area [mAU*s] | Height [mAU] | Area %   |
|--------|---------------|------|-------------|--------------|--------------|----------|
| 1      | 10.541        | MM   | 0.3577      | 2899.45532   | 135.09810    | 100.0000 |

Totals : 2899.45532 135.09810

Results obtained with enhanced integrator!

=====  
\*\*\* End of Report \*\*\*

|             |          |            |         |
|-------------|----------|------------|---------|
| SAMPLE      |          | DEC. & VT  |         |
| solvent     | DMSO     | dfrq       | 125.673 |
|             |          | dn         | C13     |
|             |          | dpwr       | 30      |
|             |          | dof        | 0       |
|             |          | dm         | mm      |
|             |          | dmm        | w       |
|             |          | dnt        | 10000   |
|             |          | dseq       | w       |
|             |          | dres       | 1.0     |
|             |          | homo       | n       |
| ACQUISITION |          | PROCESSING |         |
| sfrq        | 499.748  | wf         | ft      |
| at          | H1       | proc       | f       |
| np          | 3.001    | math       | 262144  |
| sw          | 63050    |            |         |
| fb          | 10504.2  |            |         |
| bs          | not used |            |         |
| tpwr        | 1        |            |         |
| pw          | 56       |            |         |
| di          | 8.6      |            |         |
| tof         | 2.000    |            |         |
| nt          | 1519.5   |            |         |
| ct          | 11111    |            |         |
| alock       | 8        |            |         |
| gain        | n        |            |         |
|             | not used |            |         |
| FLAGS       |          |            |         |
| l1          | n        |            |         |
| in          | n        |            |         |
| dp          | y        |            |         |
| hs          | nm       |            |         |
| DISPLAY     |          |            |         |
| sp          | -249.9   |            |         |
| wp          | 6486.8   |            |         |
| vs          | 15       |            |         |
| sc          | 250      |            |         |
| wc          | 250      |            |         |
| hzm         | 197.44   |            |         |
| rs          | 2479.2   |            |         |
| rfl         | 1249.4   |            |         |
| th          | 7        |            |         |
| ins         | 100.000  |            |         |
| at          | cdc      |            |         |
|             | ph       |            |         |

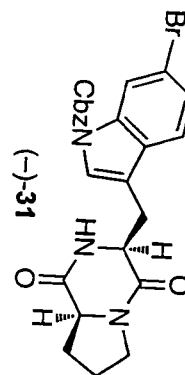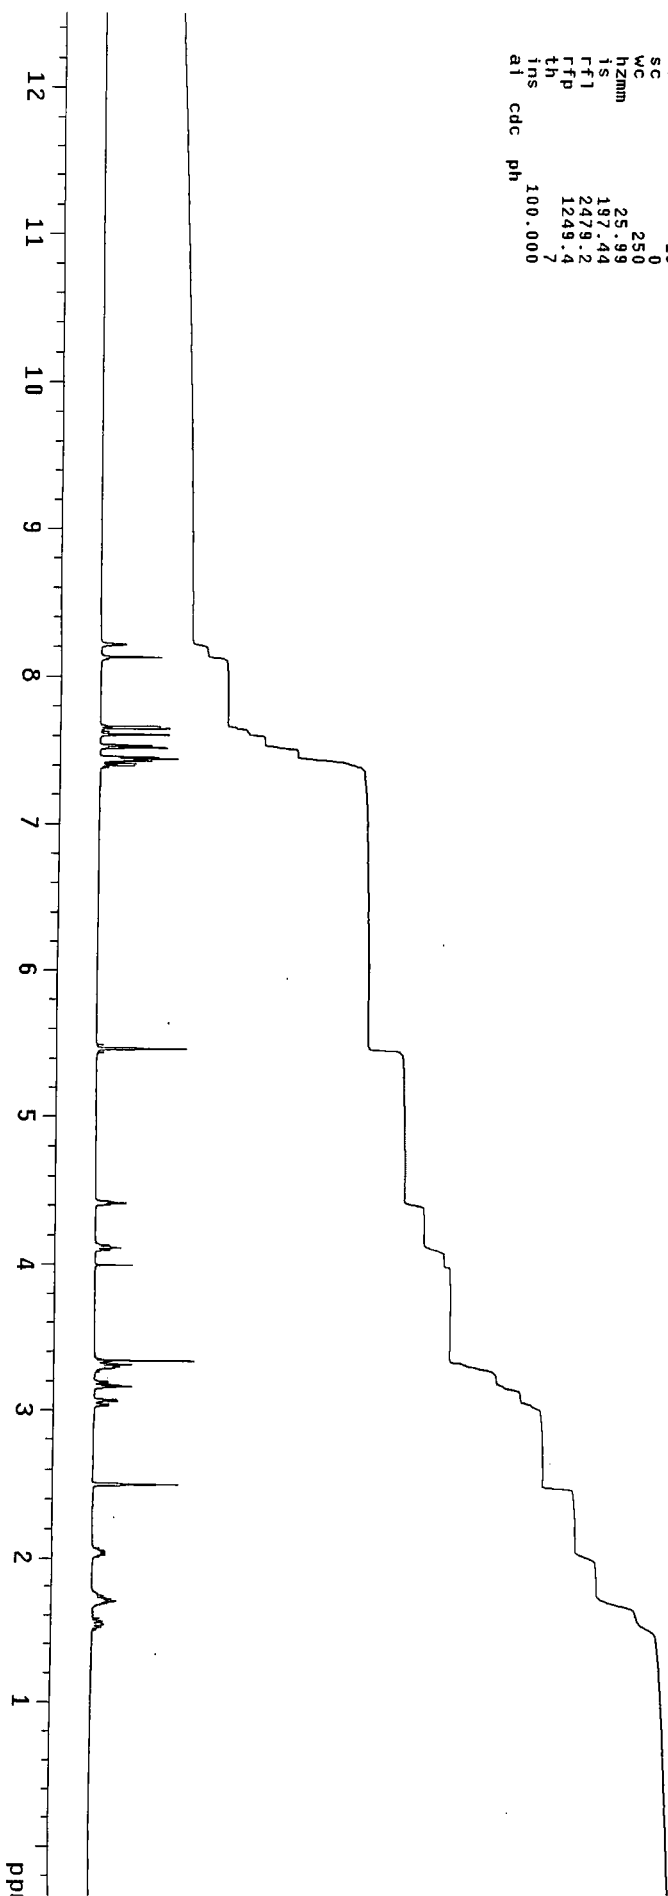

|         |      |            |          |
|---------|------|------------|----------|
| SAMPLE  |      | DEC. & VT  |          |
| solvent | DMSO | dfrq       | 500.232  |
|         |      | dn         | H1       |
|         |      | dpwr       | 37       |
|         |      | dof        | -500.0   |
|         |      | dm         | Y        |
|         |      | dmm        | W        |
|         |      | dmf        | 10000    |
|         |      | dseq       | 1.0      |
|         |      | dres       | n        |
|         |      | homo       | 1.0      |
|         |      | PROCESSING | 0.30     |
|         |      | 1b         | ft       |
|         |      | wffile     | 131072   |
|         |      | PROC       | f        |
|         |      | fn         |          |
|         |      | math       |          |
|         |      | werf       |          |
|         |      | wexp       |          |
|         |      | wbs        |          |
|         |      | wnt        |          |
|         |      | gain       | 60       |
|         |      | alock      | n        |
|         |      | nt         | n        |
|         |      | tof        | 631.4    |
|         |      | di         | 0.763    |
|         |      | pw         | 6.9      |
|         |      | ss         | 53       |
|         |      | tpwr       | 1        |
|         |      | bs         | 8        |
|         |      | fb         | not used |
|         |      | sw         | 37735.8  |
|         |      | np         | 131010   |
|         |      | at         | 1.736    |
|         |      | tr         | 0.13     |
|         |      | sfreq      | 125.795  |

|             |          |
|-------------|----------|
| ACQUISITION | 125.795  |
| tr          | 0.13     |
| at          | 1.736    |
| np          | 131010   |
| sw          | 37735.8  |
| fb          | not used |
| bs          | 8        |
| ss          | 53       |
| tpwr        | 1        |
| pw          | 6.9      |
| di          | 0.763    |
| tof         | 631.4    |
| nt          | 11111    |
| ct          | 0        |
| alock       | n        |
| gain        | 60       |
| FLAGS       |          |
| l1          | n        |
| ln          | n        |
| dp          | Y        |
| hs          | nm       |

|         |         |
|---------|---------|
| DISPLAY | -2515.8 |
| wp      | 30187.6 |
| vs      | 1332    |
| sc      | 0       |
| wc      | 250     |
| hzm     | 120.75  |
| is      | 500.00  |
| rfl     | 11342.2 |
| rfd     | 4869.7  |
| rfs     | 1.000   |
| ph      |         |

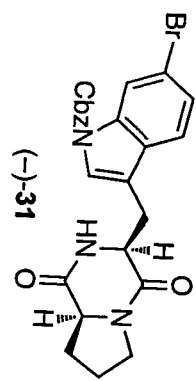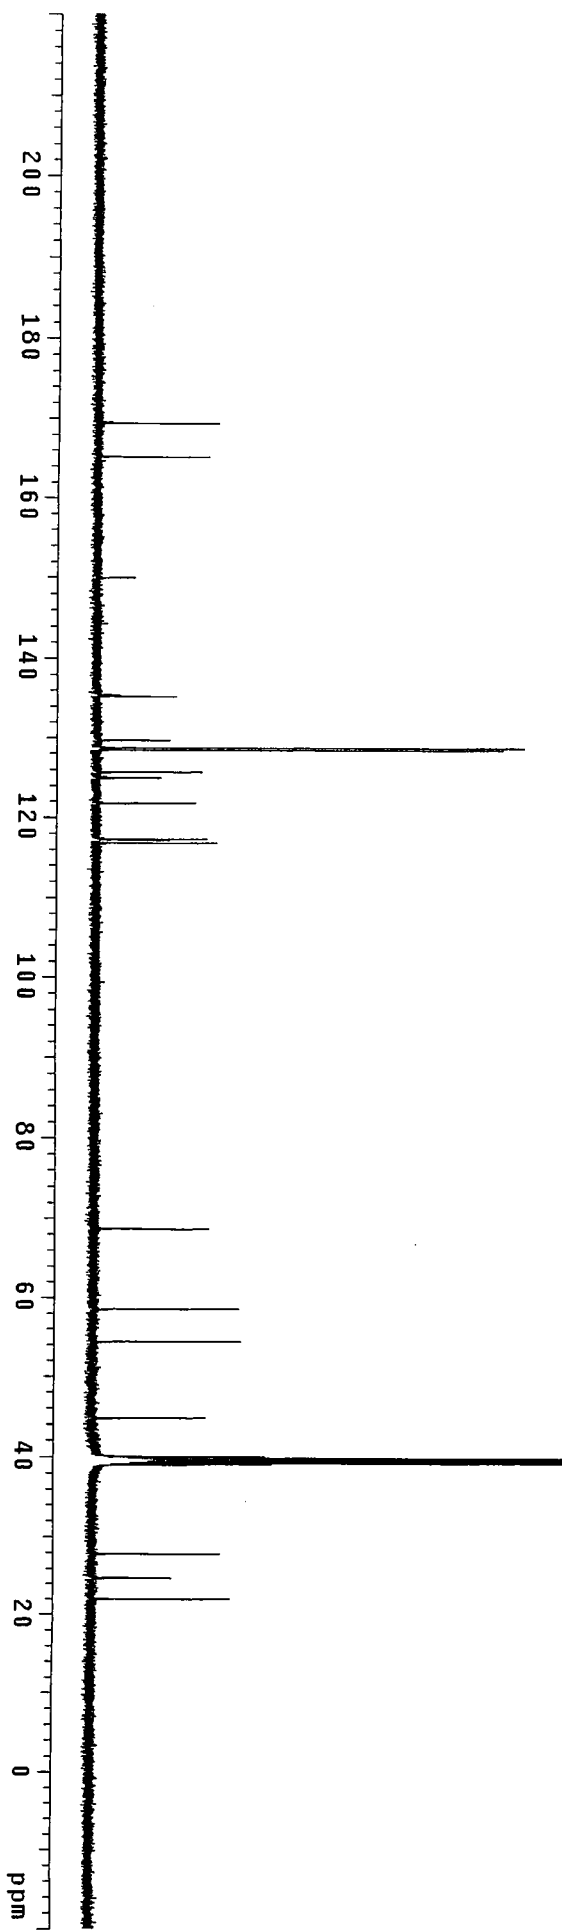

|             |          |           |         |
|-------------|----------|-----------|---------|
| SAMPLE      |          | DEC. & VT |         |
| solvent     | CDCl3    | dfrq      | 125.672 |
|             |          | dn        | G13     |
|             |          | dpwr      | 30      |
|             |          | dof       | 0       |
|             |          | dm        | nmn     |
|             |          | dmn       | w       |
|             |          | dmt       | 10000   |
|             |          | dseq      | 1.0     |
| ACQUISITION | 499.746  | proc      | n       |
| sfreq       | 499.746  | homo      |         |
| in          | H1       | wtflte    |         |
| at          | 3.001    | proc      |         |
| np          | 63050    | ft        |         |
| sw          | 10504.2  | fn        | 262144  |
| fb          | not used | math      | f       |
| bs          | 1        | werr      |         |
| tpwr        | 56       | wexp      |         |
| pw          | 8.6      | wbs       |         |
| dl          | 2.000    | wnt       |         |
| tof         | 1519.5   |           |         |
| nt          | 1111     |           |         |
| ct          | 10       |           |         |
| alock       | n        |           |         |
| gain        | not used |           |         |
| FLAGS       |          |           |         |
| il          | n        |           |         |
| in          | n        |           |         |
| dp          | y        |           |         |
| hs          | nm       |           |         |
| DISPLAY     |          |           |         |
| sp          | -249.9   |           |         |
| wp          | 6496.6   |           |         |
| vs          | 19       |           |         |
| sc          | 0        |           |         |
| wc          | 250      |           |         |
| hzhmm       | 25.99    |           |         |
| is          | 172.25   |           |         |
| rfl         | 4865.2   |           |         |
| rfp         | 3618.1   |           |         |
| th          | 7        |           |         |
| ins         | 100.000  |           |         |
| at          | cdc      |           |         |
|             | ph       |           |         |

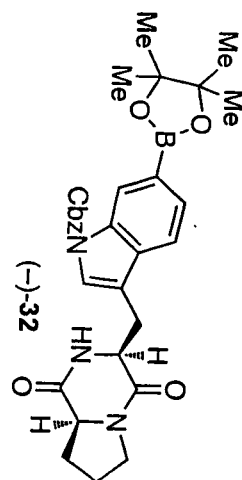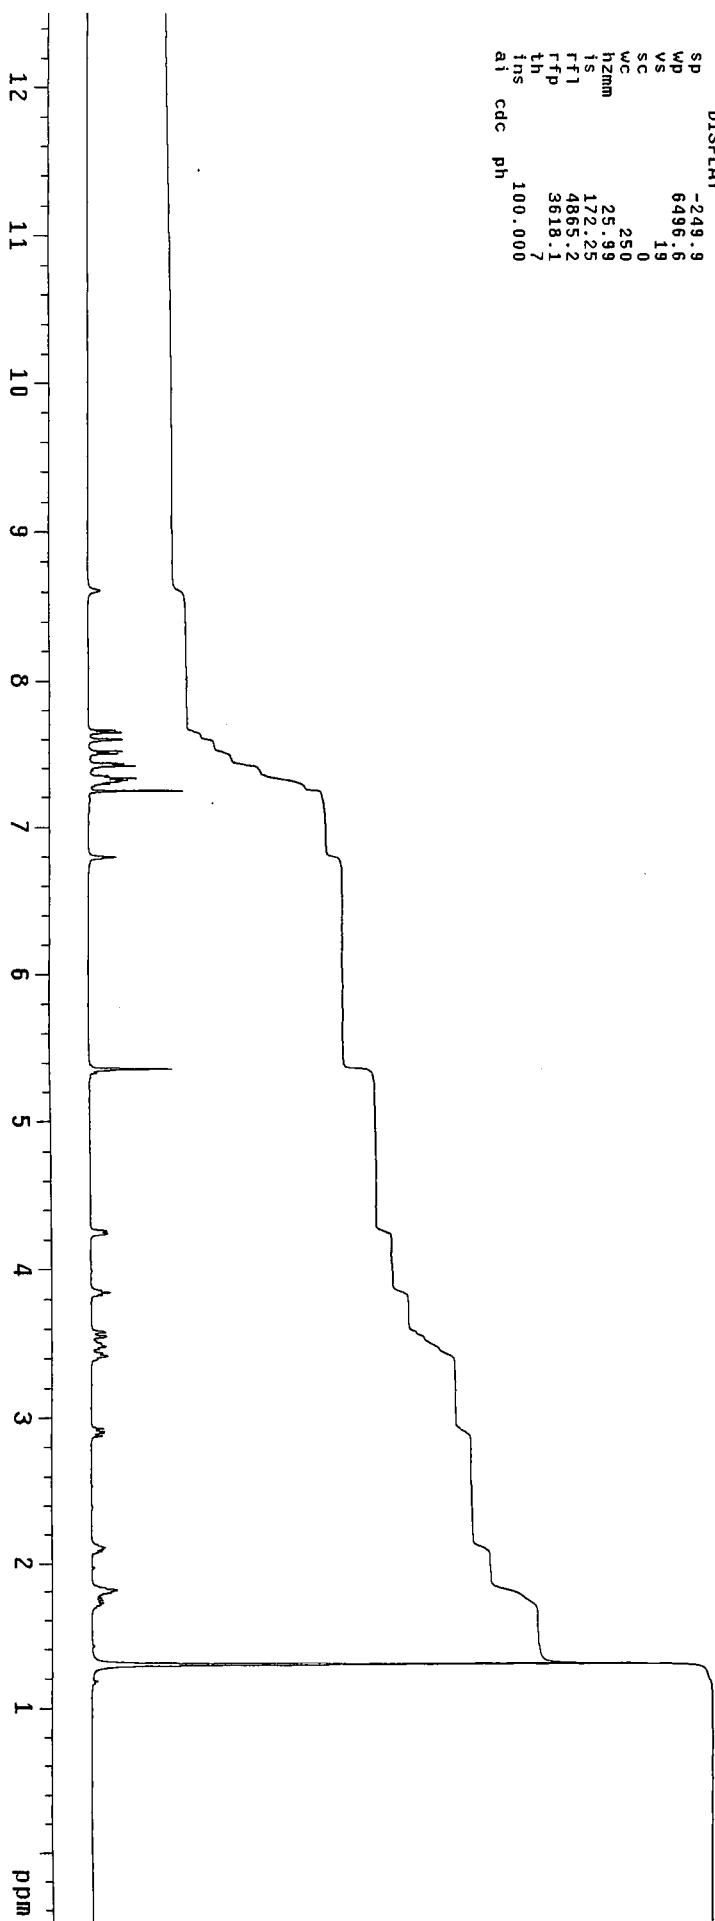



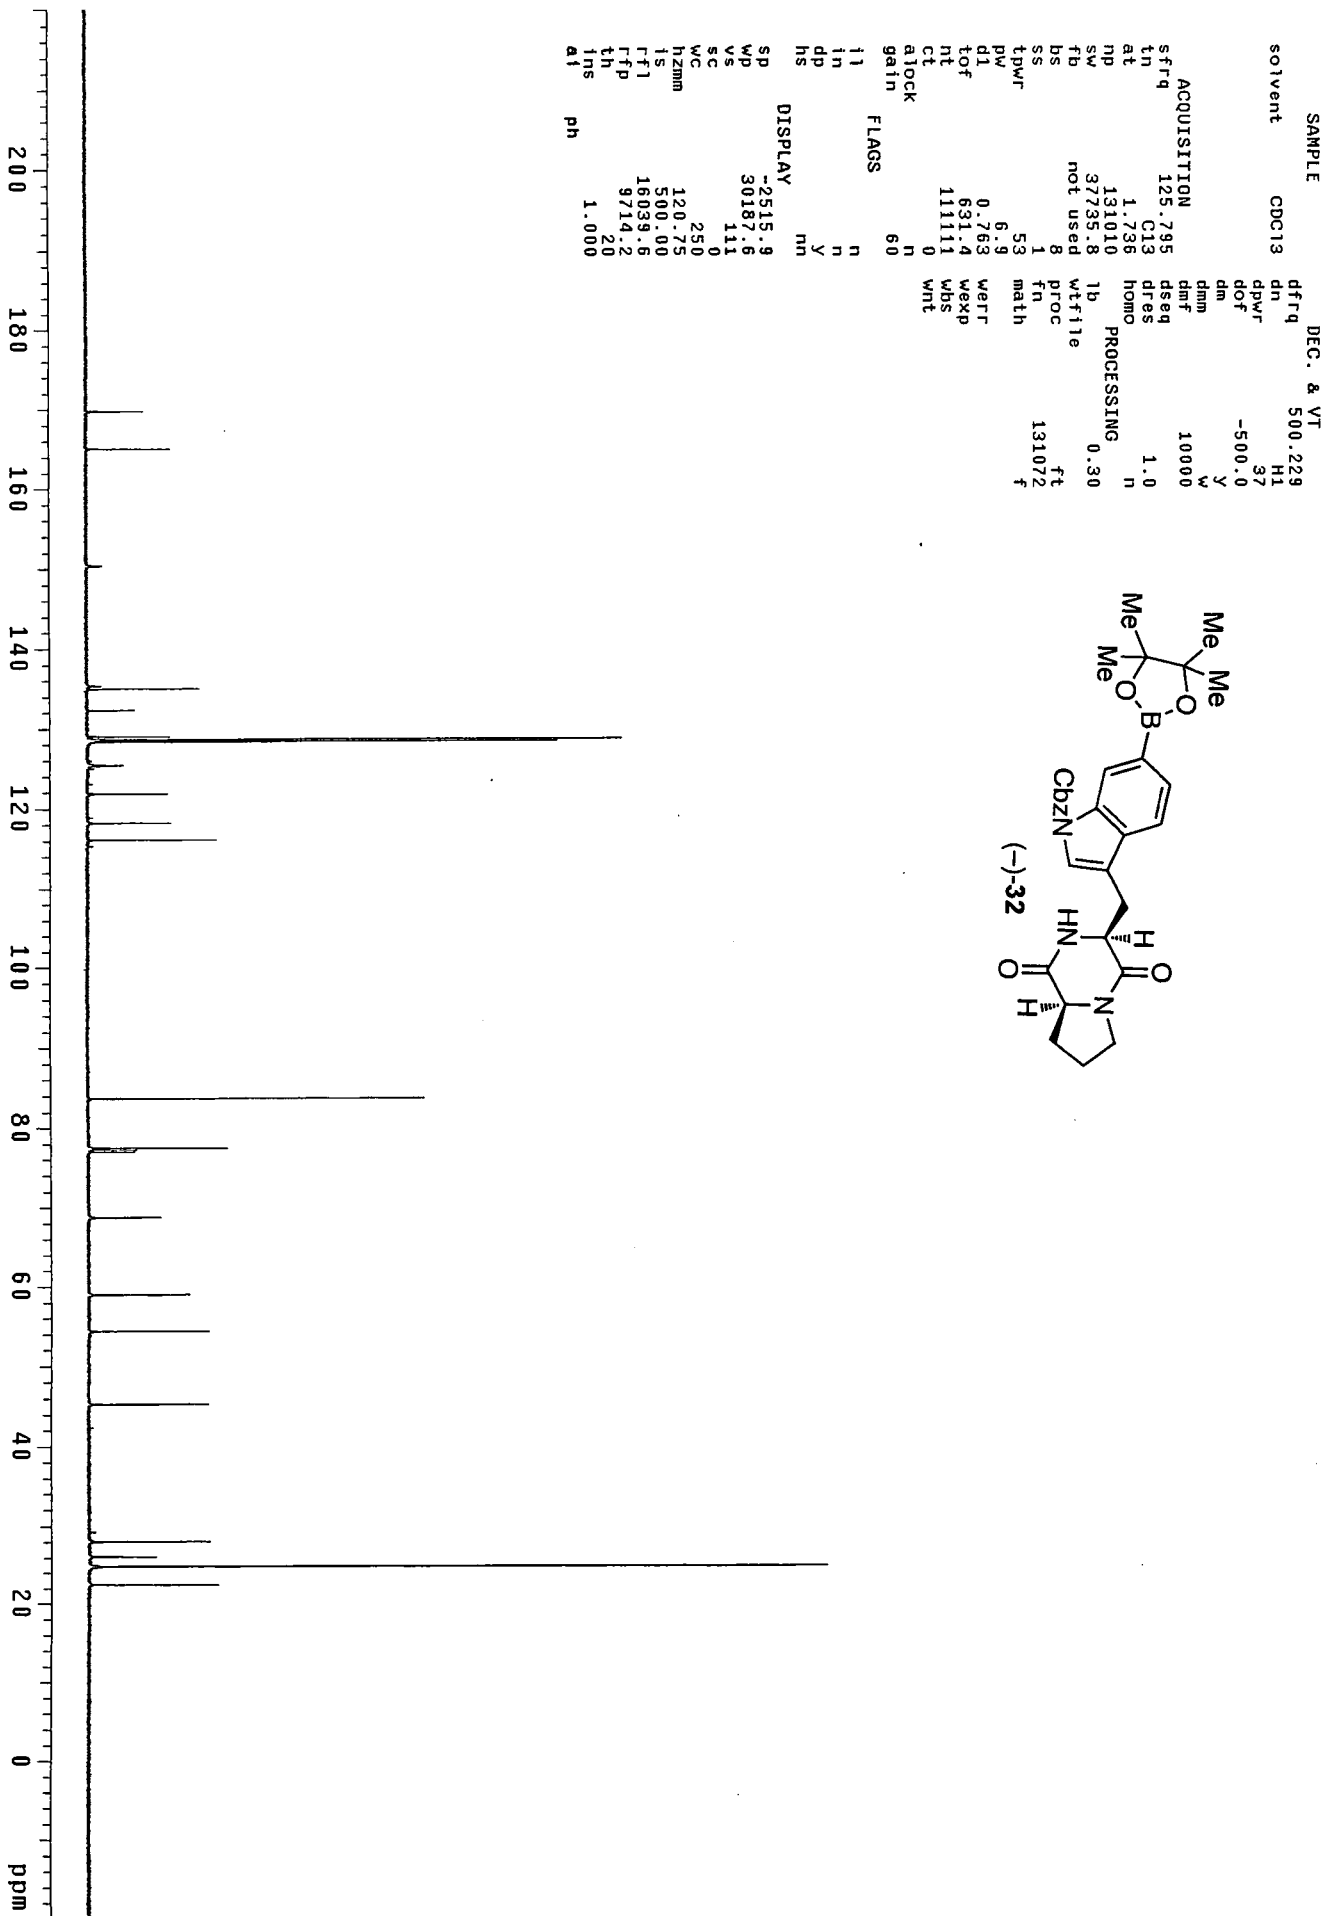

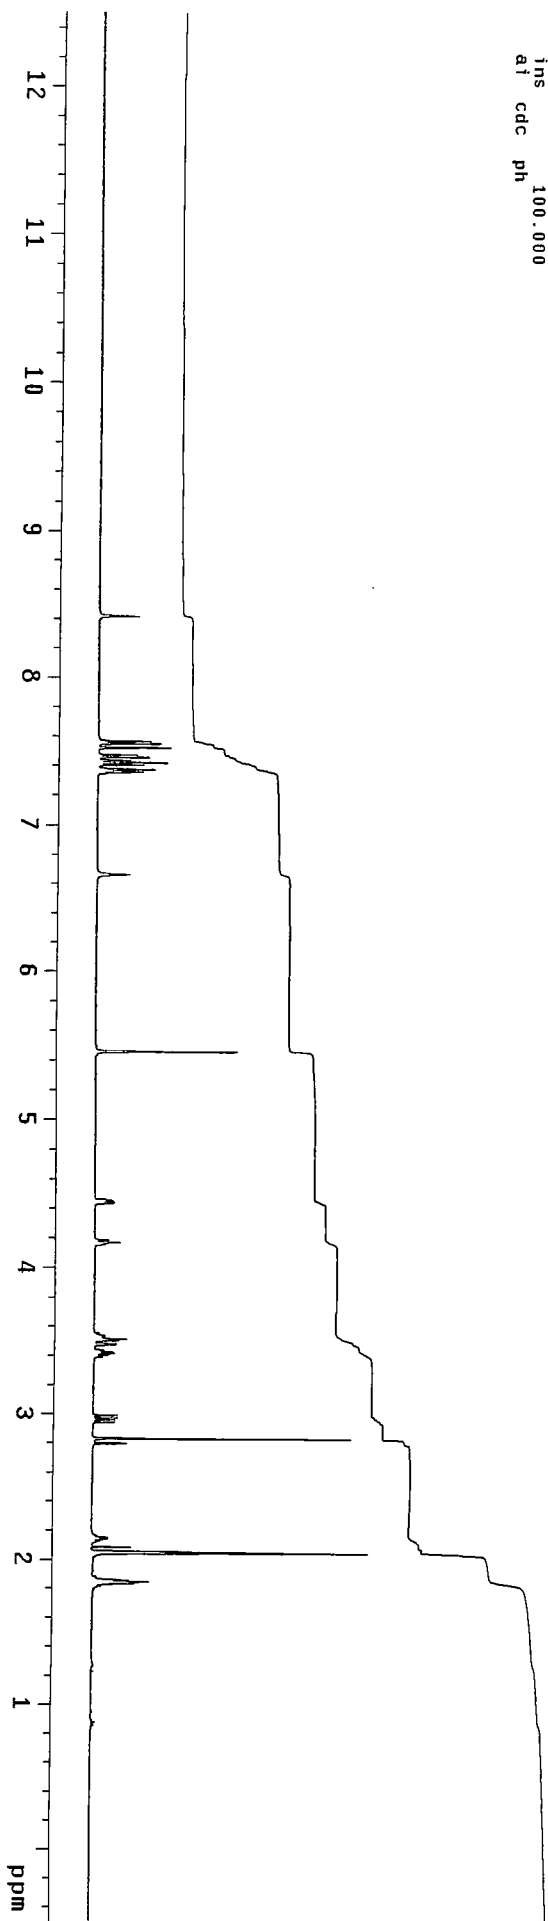

SAMPLE DEC. & VT  
 solvent Acetone dfrq 125.845  
 dn C13  
 dpwr 30  
 dof 0  
 dm nmh  
 dmm C  
 dmf 200  
 dseq C  
 dres 1.0  
 homo n  
 ACQUISITION  
 sfrq 500.433  
 tn H1  
 at 4.999  
 np 120102  
 sw 12012.0  
 fb not used  
 bs not used  
 tpwr 1  
 pw 8.0  
 di 0.100  
 tof 3003.2  
 nt 11111  
 ct 10  
 atlock n  
 gain not used  
 galm n  
 11 n  
 in n  
 dp Y  
 hs mh  
 DISPLAY  
 SP -250.3  
 WP 6505.6  
 VS 22  
 SC 0  
 WC 250  
 hzmm 26.02  
 is 195.86  
 rf1 1543.0  
 rfp 1025.9  
 th 7  
 ins 100.000  
 al cdc ph

PROCESSING  
 wffile ft  
 proc 262144  
 math f  
 werr  
 wexp  
 wbs  
 wnt  
 wft

FLAGS  
 11 not used  
 in n  
 dp Y  
 hs mh

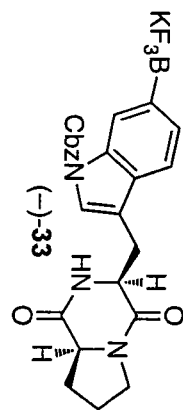

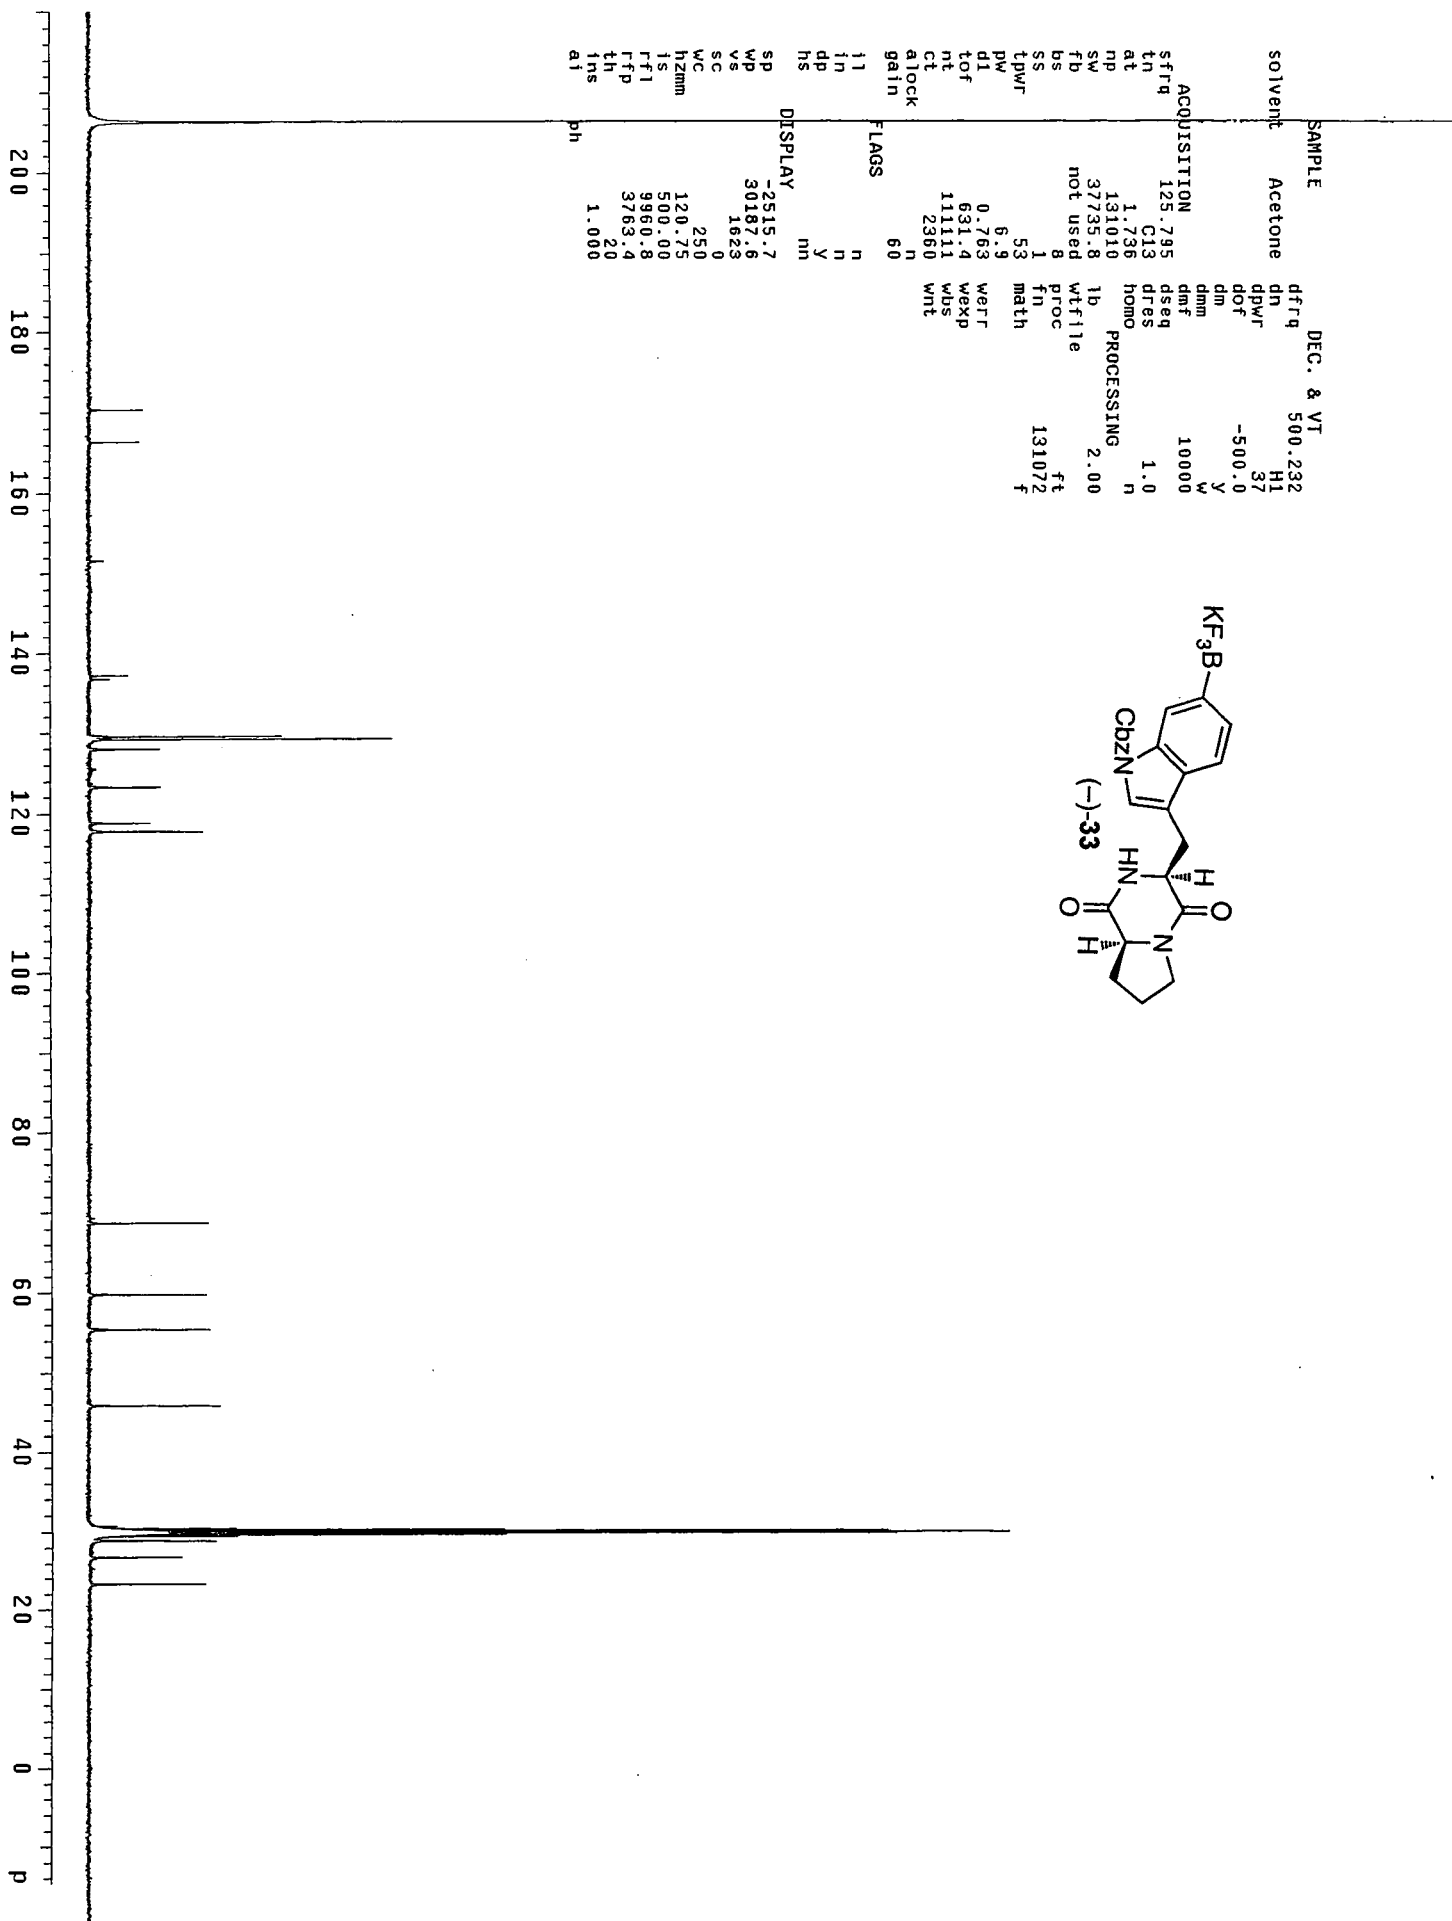

```

SAMPLE          DEC.  & VT
solvent         Acetone
dfrq            300.109
dn              H1
dPwr            30
dot            0
dm             nnn
dmm            c
dmf            200
ACQUISITION    282.383
F19
tn             0.300
at            0.300
np            59906
sw            100000.0
fb            55000
bs            16
tpwr          56
dw            11.0
d1            4.000
tof           29637.2
nt            11111
ct            0
alock         not used
gain           n
flags         not used
ii            n
in            n
dp            y
DISPLAY
sp            -45181.3
wp            90351.8
vs            24
sc            0
wc            250
hzm          361.45
is            500.00
rfl           49424.0
rfl           0
th            20
ins           100.000
nm
  
```

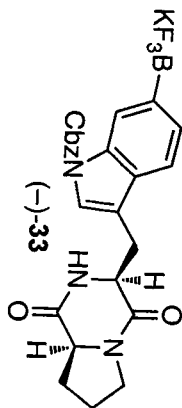

140 120 100 80 60 40 20 0 -20 -40 -60 -80 -100 -120 -140 F

|             |          |            |         |
|-------------|----------|------------|---------|
| SAMPLE      |          | DEC. & VT  |         |
| solvent     | DMSO     | dfreq      | 125.673 |
|             |          | dn         | C13     |
|             |          | dpwr       | 30      |
|             |          | dof        | 0       |
|             |          | dm         | nm      |
|             |          | dmm        | w       |
|             |          | dseq       | 10000   |
|             |          | dmf        | w       |
|             |          | dres       | 1.0     |
|             |          | homo       | n       |
| ACQUISITION |          | PROCESSING |         |
| sfrq        | 499.748  | wtfile     | ft      |
| tn          | H1       | proc       | 262144  |
| at          | 3.001    | fn         | f       |
| np          | 63050    | math       |         |
| sw          | 10504.2  | verr       |         |
| fb          | not used | wexp       |         |
| bs          | 1        | wds        |         |
| tpwr        | 56       | wrt        |         |
| pw          | 8.6      |            |         |
| d1          | 2.000    |            |         |
| tof         | 1519.5   |            |         |
| nt          | 11111    |            |         |
| ct          | 9        |            |         |
| atlock      | n        |            |         |
| gain        | not used |            |         |
| FLAGS       |          |            |         |
| l1          | n        |            |         |
| in          | n        |            |         |
| dp          | y        |            |         |
| hs          | nm       |            |         |
| DISPLAY     |          |            |         |
| sp          | -249.9   |            |         |
| wp          | 6496.6   |            |         |
| vs          | 15       |            |         |
| sc          | 0        |            |         |
| wc          | 250      |            |         |
| h2mm        | 25.98    |            |         |
| is          | 178.08   |            |         |
| ft1         | 2479.1   |            |         |
| ftf         | 1249.4   |            |         |
| th          | 7        |            |         |
| ins         | 100.000  |            |         |
| ai          | cdc      |            |         |
|             | ph       |            |         |

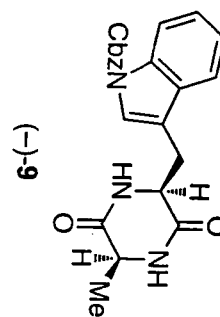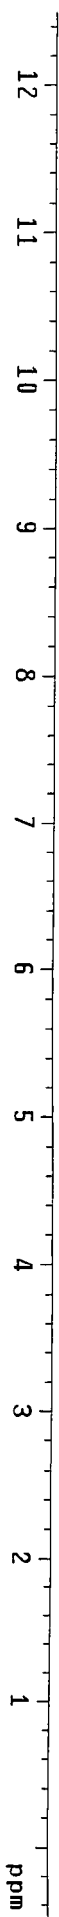

|             |          |            |         |
|-------------|----------|------------|---------|
| SAMPLE      |          | DEC. & VT  |         |
| solvent     | DMSO     | dfrq       | 500.232 |
|             |          | dn         | H1      |
|             |          | dpwr       | 37      |
|             |          | dof        | -500.0  |
|             |          | dm         | Y       |
|             |          | dmm        | W       |
|             |          | dmf        | 10000   |
|             |          | dseq       |         |
|             |          | drs        | 1.0     |
|             |          | homo       | n       |
| ACQUISITION |          | PROCESSING |         |
| sfrq        | 125.795  | lb         | 0.30    |
| tn          | C13      | wtfile     |         |
| at          | 1.736    | proc       |         |
| np          | 131010   | fn         | 131072  |
| sw          | 37735.8  | math       | f       |
| td          | not used |            |         |
| bs          | 8        |            |         |
| ss          | 1        |            |         |
| tpwr        | 53       |            |         |
| pw          | 6.9      |            |         |
| di          | 0.763    |            |         |
| tof         | 631.4    |            |         |
| nt          | 11111    |            |         |
| ct          | 0        |            |         |
| alock       | n        |            |         |
| gain        | 60       |            |         |
| FLAGS       |          |            |         |
| il          | n        |            |         |
| in          | n        |            |         |
| dp          | Y        |            |         |
| hs          | nn       |            |         |
| DISPLAY     |          |            |         |
| sp          | -2515.8  |            |         |
| wp          | 30187.6  |            |         |
| vs          | 1073     |            |         |
| sc          | 0        |            |         |
| wc          | 250      |            |         |
| hzzmm       | 120.75   |            |         |
| is          | 500.00   |            |         |
| rfl         | 11342.8  |            |         |
| rtp         | 4869.7   |            |         |
| th          | 3        |            |         |
| ins         | 1.000    |            |         |
| at          | ph       |            |         |

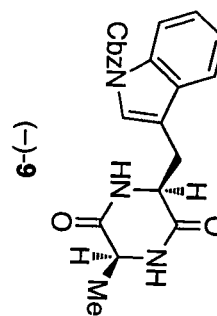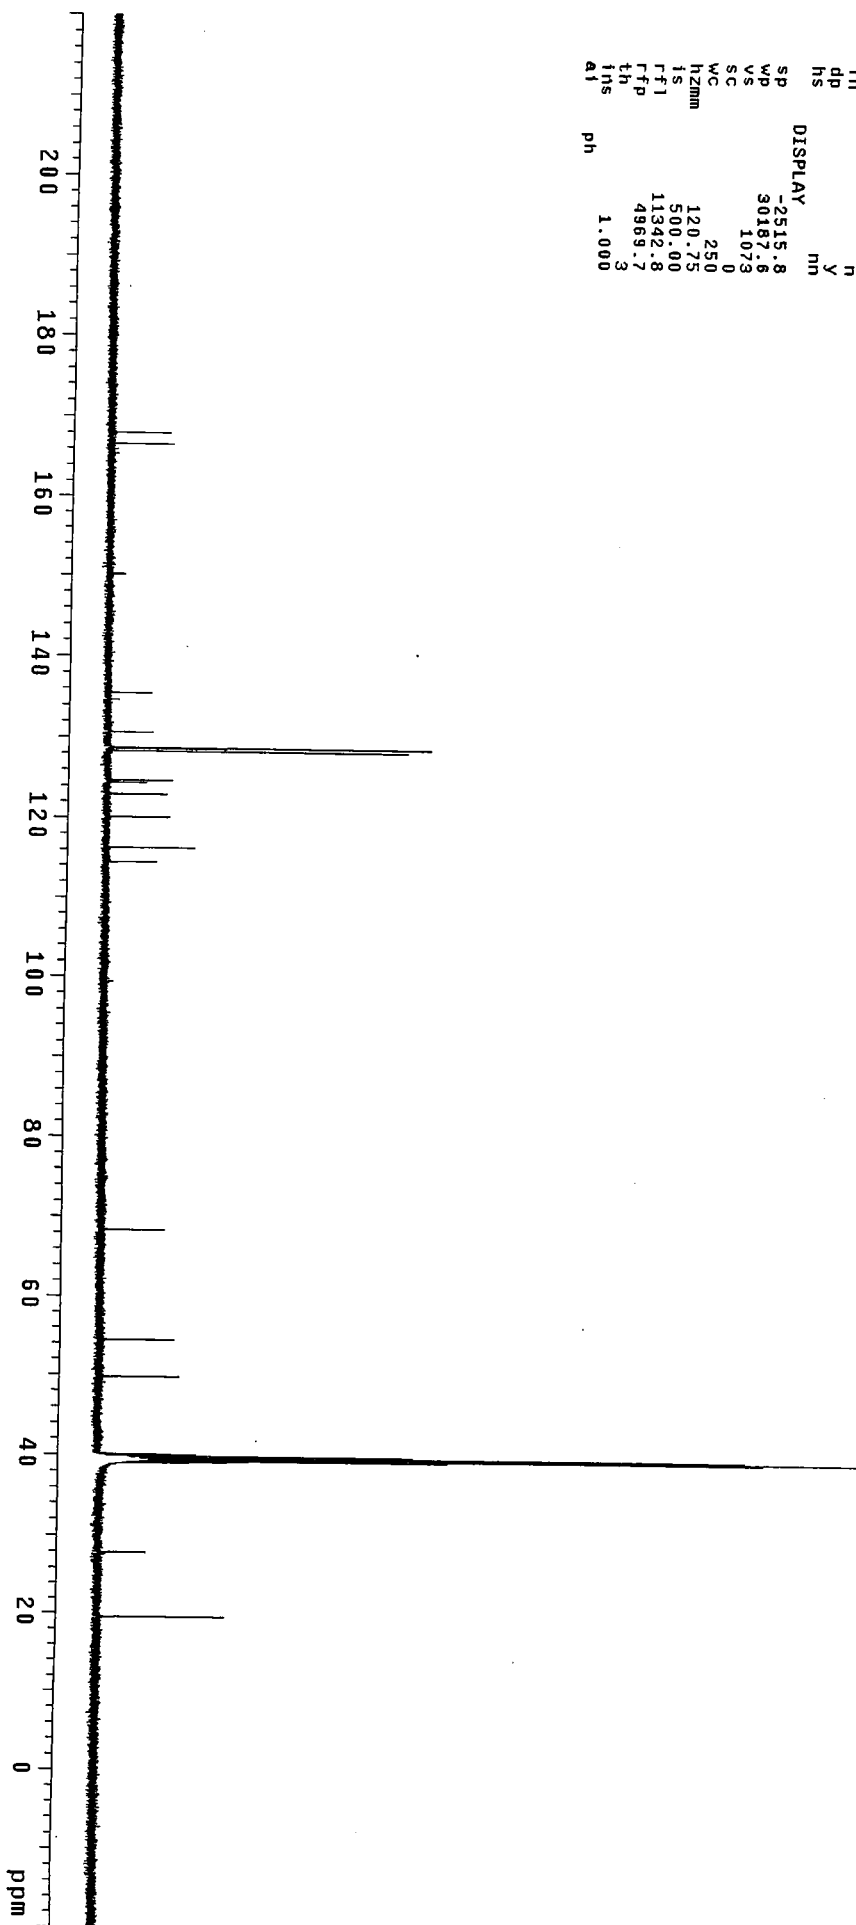

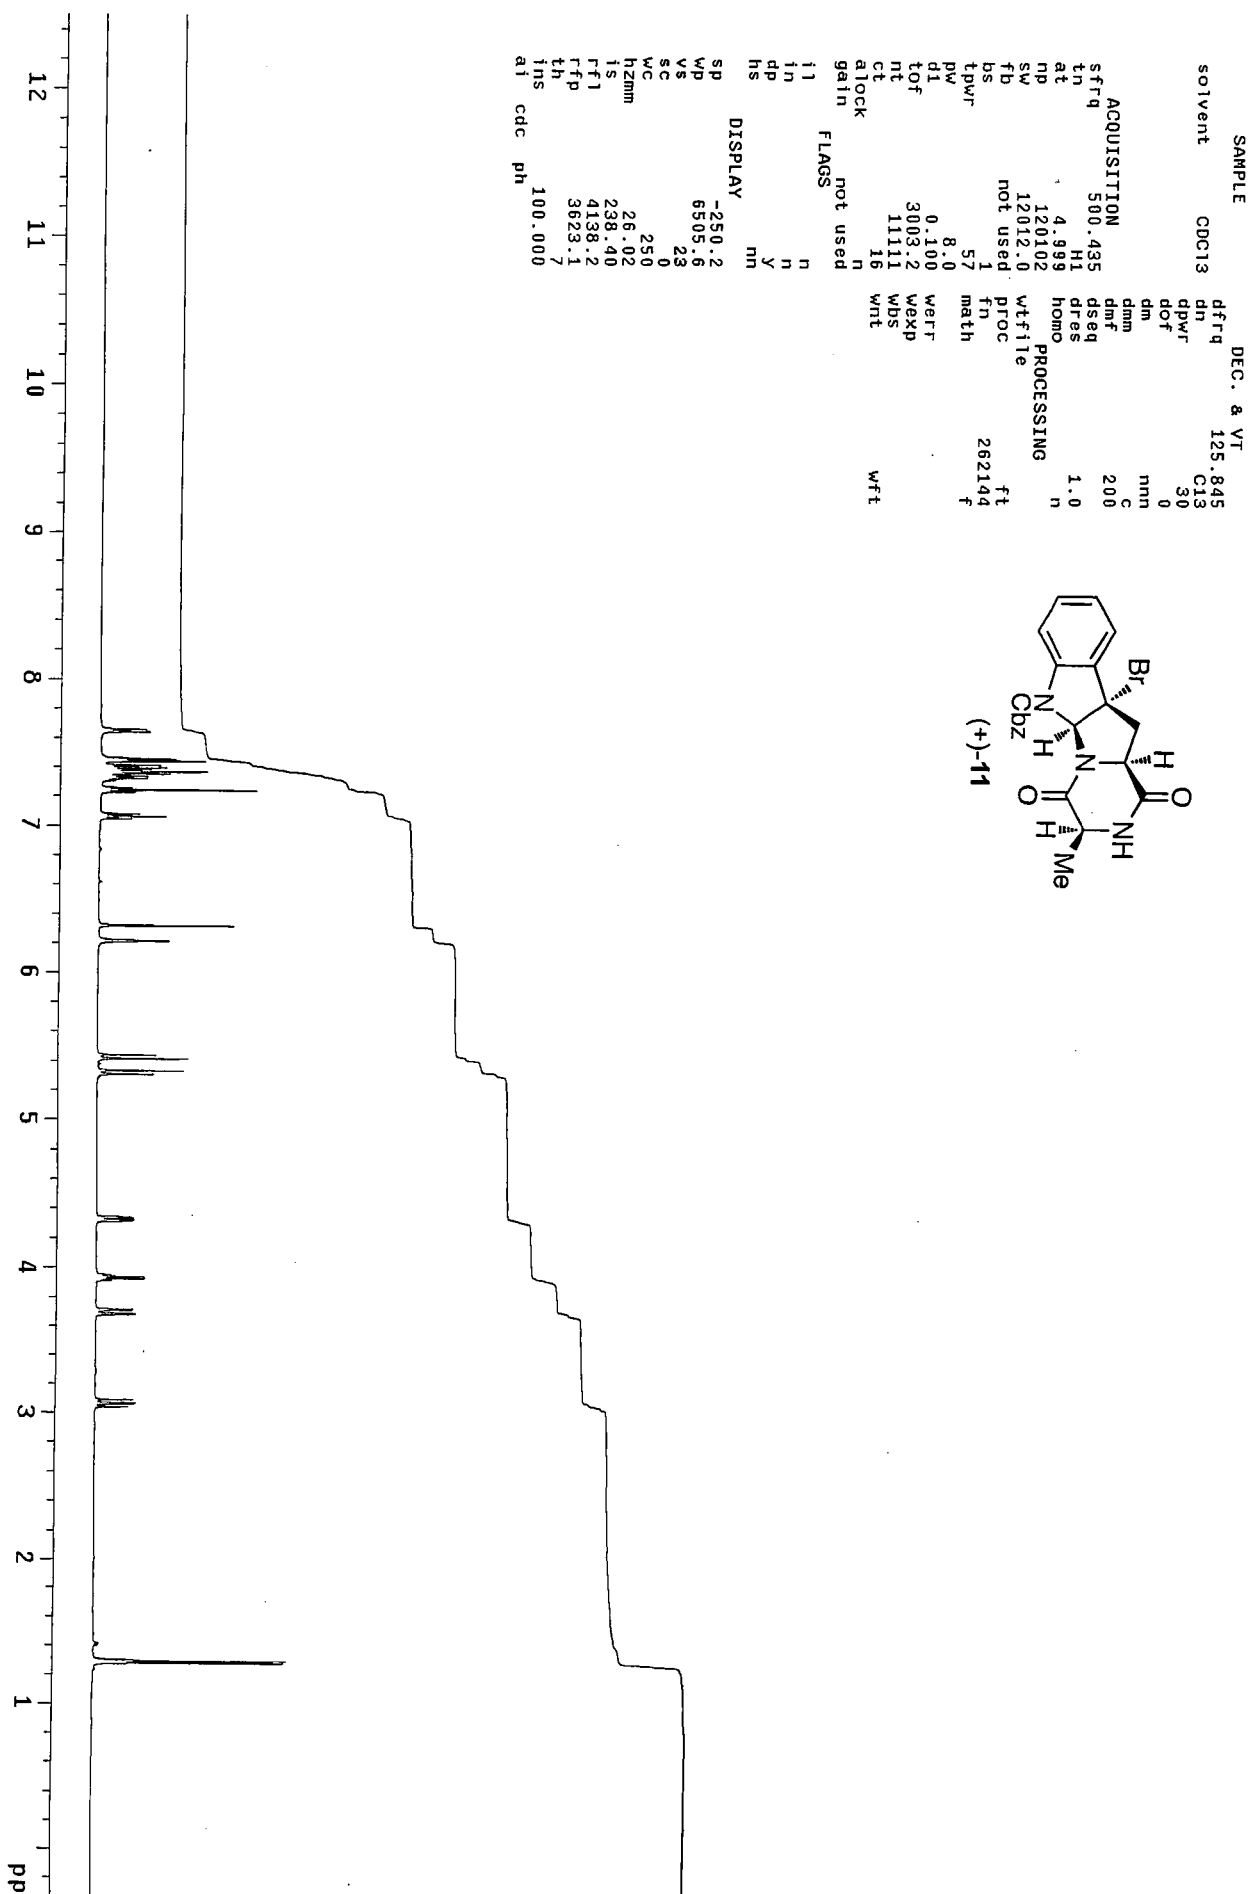

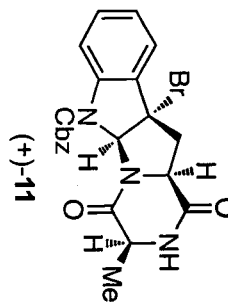

|            |           |
|------------|-----------|
| SAMPLE     | DEC. & VT |
| solvent    | CDC13     |
| dfrq       | 500.229   |
| dn         | H1        |
| dpwr       | 37        |
| dof        | -500.0    |
| dm         | y         |
| dmm        | w         |
| dmf        | 10000     |
| dseq       | 1.0       |
| dres       | n         |
| homd       | n         |
| PROCESSING | 0.30      |
| ft         | ft        |
| fn         | fn        |
| math       | 131072    |
| werr       | 0.763     |
| wexp       | 631.4     |
| wbs        | 111111    |
| wnt        | 128       |
| gain       | 60        |
| FLAGS      |           |
| l1         | n         |
| l2         | n         |
| l3         | y         |
| l4         | nm        |
| DISPLAY    |           |
| sp         | -2515.9   |
| wd         | 30187.6   |
| ve         | 209       |
| sc         | 0         |
| WC         | 250       |
| hZmm       | 120.75    |
| IS         | 500.00    |
| ffl        | 16032.7   |
| ffp        | 9714.2    |
| lh         | 20        |
| lms        | 1.000     |
| al         | ph        |

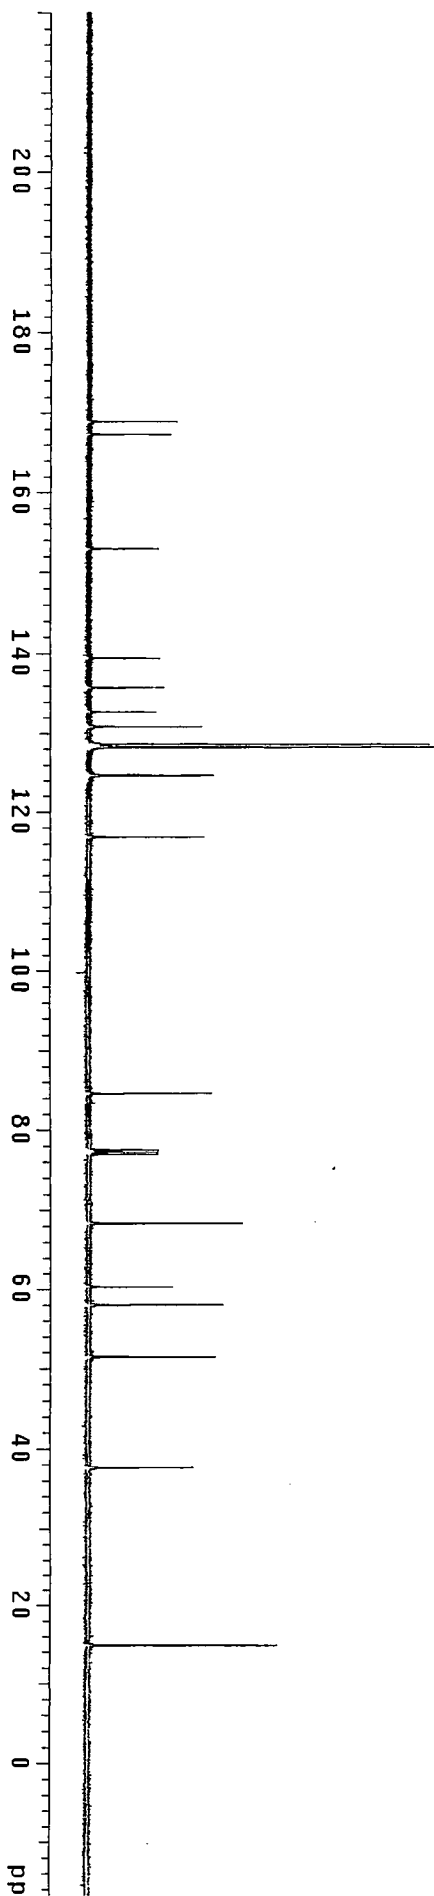



|             |          |            |         |
|-------------|----------|------------|---------|
| SAMPLE      |          | DEC. & VT  |         |
| solvent     | CDCl3    | dfreq      | 125.672 |
|             |          | dn         | 0.13    |
|             |          | dpwr       | 30      |
|             |          | dof        | 0       |
|             |          | dm         | nmh     |
|             |          | dmh        | w       |
|             |          | dmf        | 10000   |
|             |          | dscd       | 1.0     |
|             |          | homo       | n       |
| ACQUISITION |          | PROCESSING |         |
| sfrq        | 499.746  | homo       | 1.0     |
| tn          | H1       | proc       | ft      |
| at          | 3.001    | wf1file    | 2621d4  |
| np          | 63050    | fn         | f       |
| sw          | 10504.2  | math       |         |
| fb          | not used | werr       |         |
| tpwr        | 1        | wexp       |         |
| bs          | 56       | wbs        |         |
| dl          | 8.6      | wnt        |         |
| pw          | 2.000    |            |         |
| nt          | 1519.3   |            |         |
| ct          | 1111     |            |         |
| atlock      | 24       |            |         |
| gain        | not used |            |         |
| FLAGS       |          |            |         |
| i1          | n        |            |         |
| in          | y        |            |         |
| dp          | y        |            |         |
| hs          | nm       |            |         |
| DISPLAY     |          |            |         |
| sp          | -249.9   |            |         |
| wp          | 6496.6   |            |         |
| vs          | 64       |            |         |
| sc          | 0        |            |         |
| wc          | 250      |            |         |
| hzmh        | 25.99    |            |         |
| is          | 247.40   |            |         |
| rfl         | 4866.0   |            |         |
| rffp        | 3618.1   |            |         |
| th          | 7        |            |         |
| ins         | 100.000  |            |         |
| at          | cdc      |            |         |
|             | ph       |            |         |

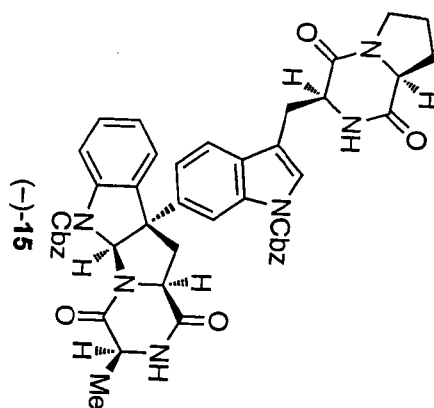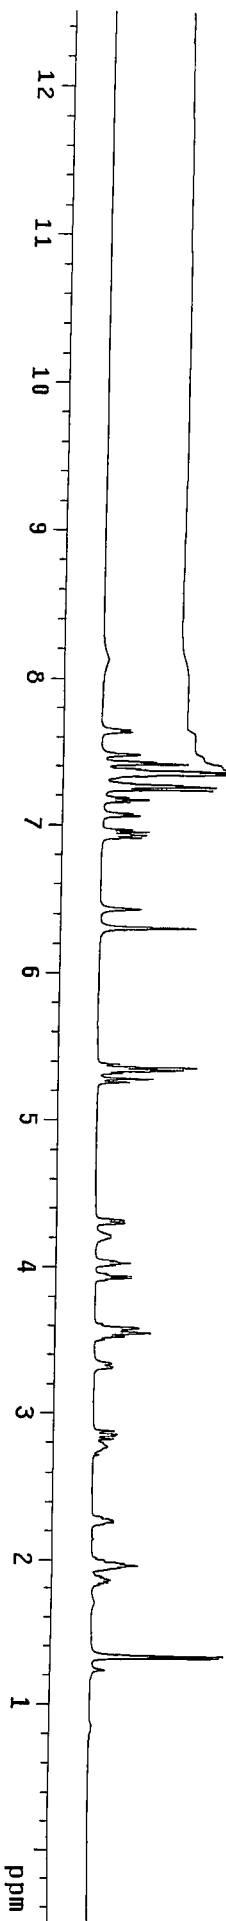

|             |            |           |
|-------------|------------|-----------|
| SAMPLE      |            | DEC. & VT |
| solvent     | CDCl3      | 500.229   |
|             |            | H1        |
|             |            | 37        |
|             |            | -500.0    |
|             |            | W         |
|             |            | Y         |
|             |            | 10000     |
|             |            | W         |
|             |            | Y         |
| ACQUISITION |            |           |
| sfrq        | 125.795    |           |
| at          | 1.736      |           |
| np          | 131010     |           |
| sw          | 37735.8    |           |
| fb          | not used   |           |
| bs          |            |           |
| ss          |            |           |
| tpwr        | 53         |           |
| pw          | 6.9        |           |
| dl          | 0.763      | werr      |
| tof         | 631.4      | wexp      |
| nt          | 1.1111e+06 | wbs       |
| ct          | 10792      | wnt       |
| alock       |            |           |
| gain        | 60         |           |
| FLAGS       |            |           |
| fl          | n          |           |
| in          | n          |           |
| dp          | y          |           |
| hs          | nh         |           |
| DISPLAY     |            |           |
| sp          | -2515.9    |           |
| wp          | 30187.6    |           |
| vs          | 1001       |           |
| sc          | 0          |           |
| wc          | 250        |           |
| hzmm        | 120.75     |           |
| is          | 500.00     |           |
| rfl         | 16006.8    |           |
| rffp        | 9714.2     |           |
| th          | 20         |           |
| ins         | 1.000      |           |
| ai          | ph         |           |

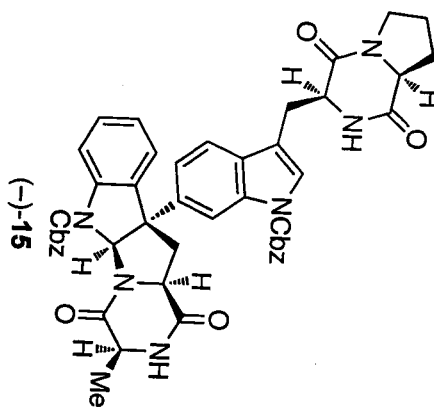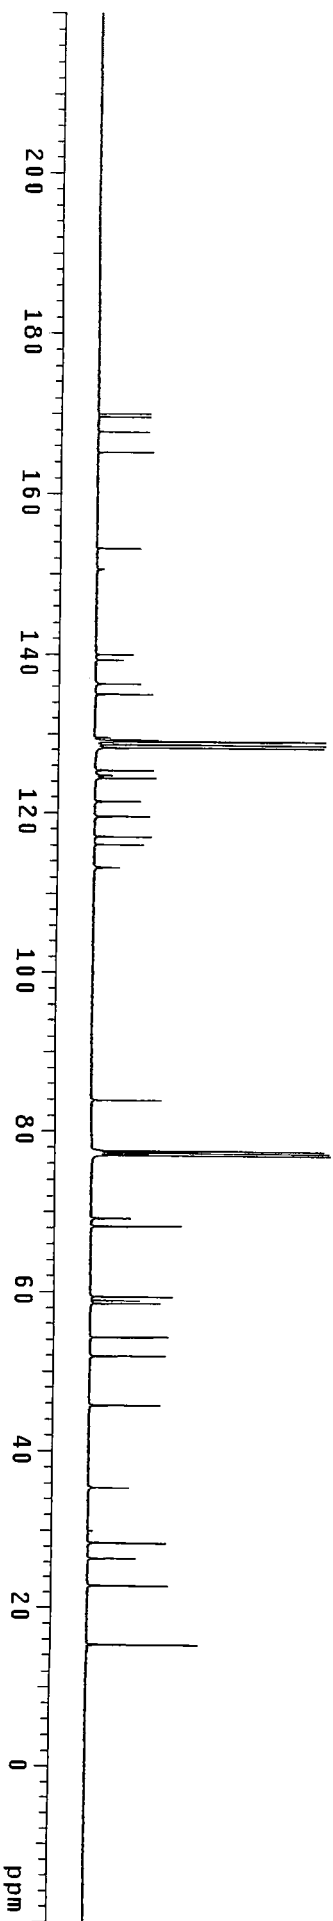

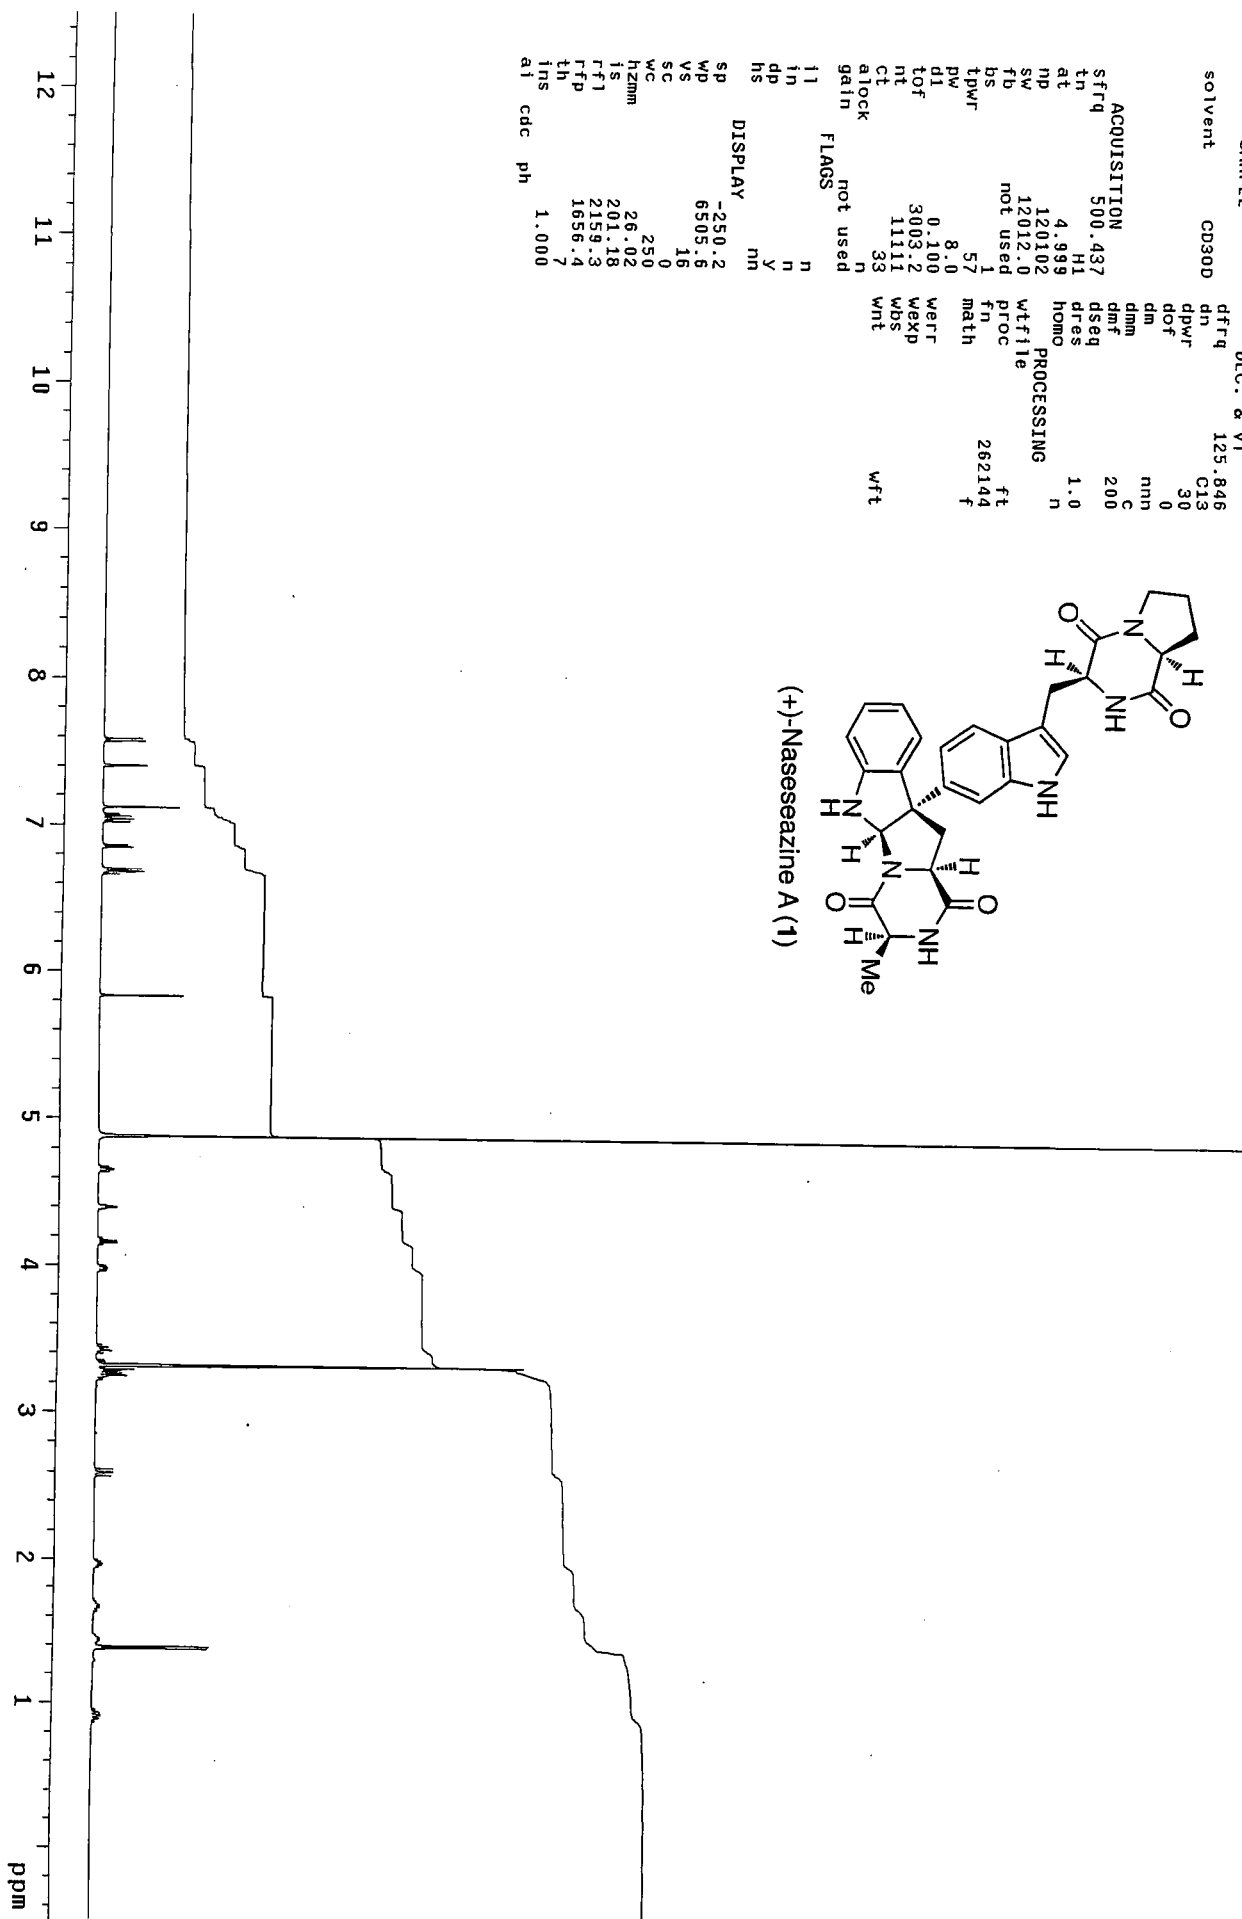

|             |          |            |         |
|-------------|----------|------------|---------|
| SAMPLE      |          | DEC. & VT  |         |
| solvent     | CD30D    | dfreq      | 500.231 |
|             |          | dn         | H1      |
|             |          | dpwr       | 37      |
|             |          | dof        | -500.0  |
|             |          | dm         | Y       |
|             |          | dmm        | Y       |
|             |          | dntf       | 10000   |
|             |          | dres       | W       |
|             |          | homo       | 1.0     |
| ACQUISITION |          | PROCESSING |         |
| sfrq        | 125.795  | ft         | 0.30    |
| tn          | 1.736    | ft         | 131072  |
| at          | 131010   | ft         | †       |
| np          | 37735.8  | lq         |         |
| sw          | not used | wfite      |         |
| fb          | 1        | proc       |         |
| bs          | 8        | fn         |         |
| ss          | 1        | math       |         |
| tpwr        | 53       |            |         |
| pw          | 6.9      | weff       |         |
| dl          | 0.763    | wexp       |         |
| tof         | 631.4    | wbs        |         |
| nt          | 11111    | wnt        |         |
| ct          | 8576     |            |         |
| alock       | n        |            |         |
| gain        | 60       |            |         |
| FLAGS       |          |            |         |
| l1          | n        |            |         |
| l2          | n        |            |         |
| dp          | Y        |            |         |
| hs          | nm       |            |         |
| DISPLAY     |          |            |         |
| sp          | -2515.9  |            |         |
| wp          | 30187.6  |            |         |
| vs          | 1687     |            |         |
| sc          | 0        |            |         |
| wc          | 250      |            |         |
| n2mm        | 120.75   |            |         |
| is          | 500.00   |            |         |
| rf1         | 1229.7   |            |         |
| rfp         | 6182.2   |            |         |
| th          | 20       |            |         |
| ins         | 1.000    |            |         |
| al          | ph       |            |         |

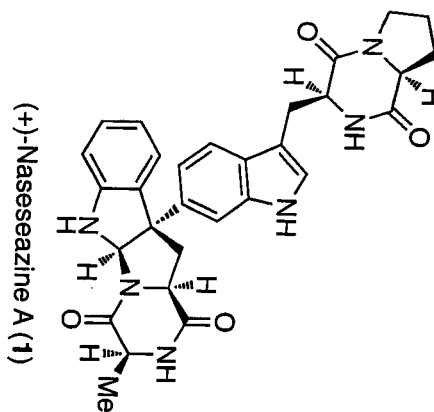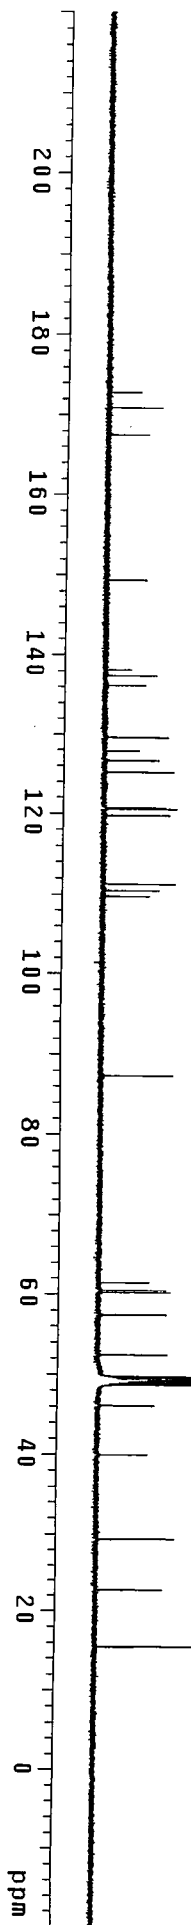

|             |          |            |         |
|-------------|----------|------------|---------|
| SAMPLE      |          | DEC. & VT  |         |
| solvent     | DMSO     | dfrq       | 125.673 |
|             |          | dn         | C13     |
|             |          | dpwr       | 30      |
|             |          | dof        | 0       |
|             |          | dm         | mm      |
|             |          | dim        | w       |
|             |          | dmm        | 10000   |
|             |          | dsmf       |         |
|             |          | dres       | 1.0     |
|             |          | homo       | n       |
| ACQUISITION |          | PROCESSING |         |
| sfrq        | 499.748  | wf file    | ft      |
| tn          | H1       | proc       | 262144  |
| at          | 3.001    | math       | f       |
| np          | 63050    |            |         |
| sw          | 10504.2  |            |         |
| td          | not used |            |         |
| bs          | 1        |            |         |
| fpwr        | 56       |            |         |
| pw          | 8.6      |            |         |
| d1          | 2.000    |            |         |
| tof         | 1519.5   |            |         |
| nt          | 11111    |            |         |
| ct          | 12       |            |         |
| atlock      | not used |            |         |
| gain        | not used |            |         |
| l1          | n        |            |         |
| l1n         | n        |            |         |
| dp          | y        |            |         |
| hs          | nm       |            |         |
| DISPLAY     |          |            |         |
| sp          | -249.9   |            |         |
| wd          | 6496.6   |            |         |
| vs          | 10       |            |         |
| sc          | 0        |            |         |
| wc          | 250      |            |         |
| n2mm        | 25.99    |            |         |
| ts          | 158.44   |            |         |
| ff1         | 2478.9   |            |         |
| rffp        | 1249.4   |            |         |
| th          | 7        |            |         |
| ins         | 100.000  |            |         |
| at          | cdc      |            |         |
|             | ph       |            |         |

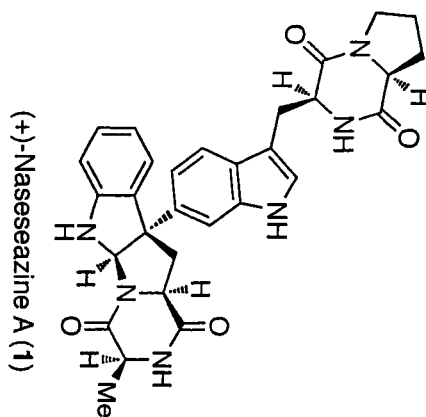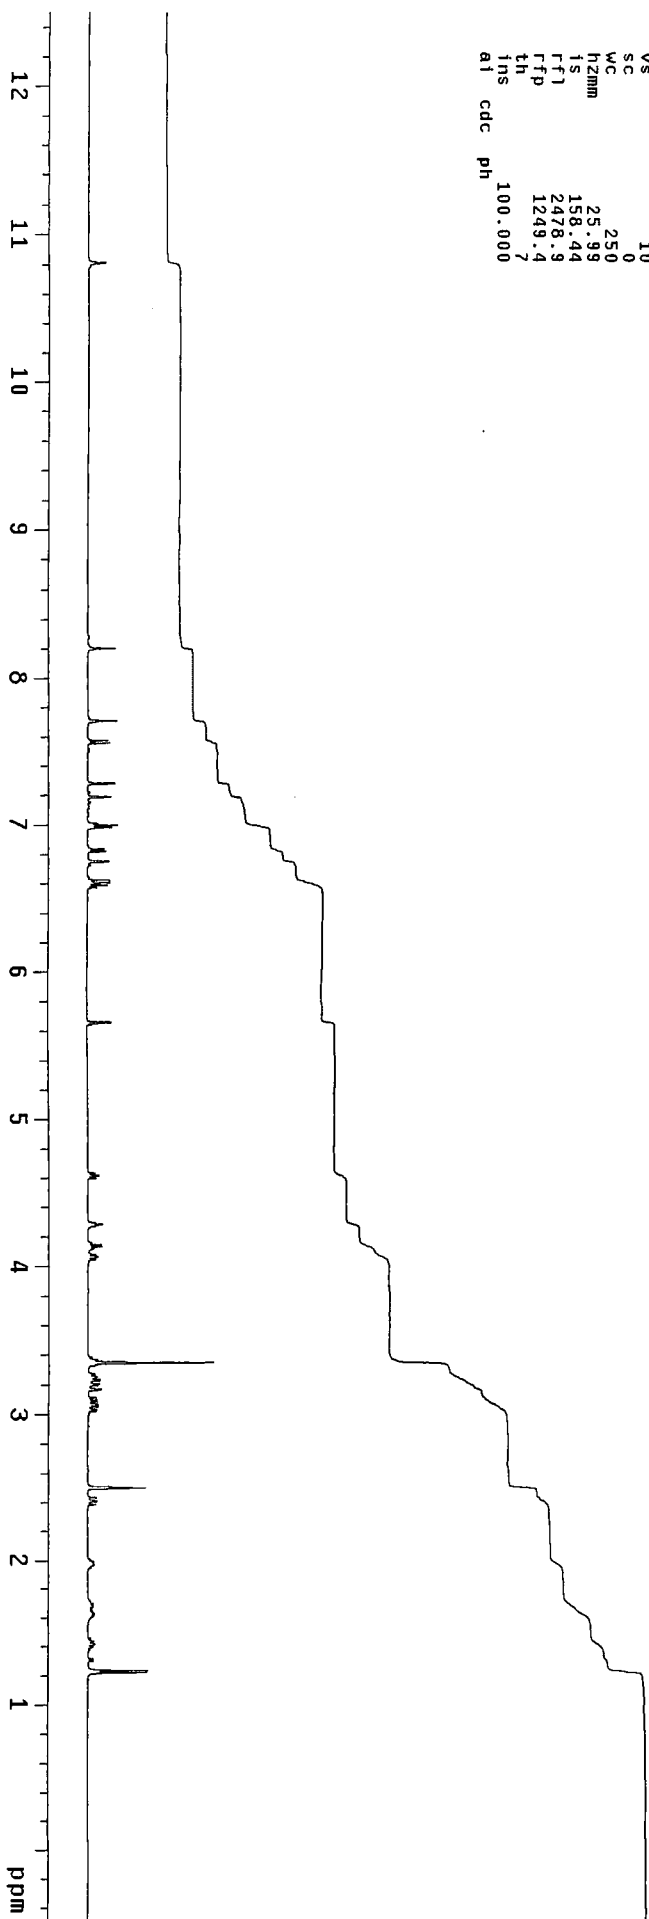

|             |           |             |
|-------------|-----------|-------------|
| SAMPLE      | DEC. & VT | 500.232     |
| solvent     | DMSO      | H1          |
|             | dfreq     | 37          |
|             | dpwr      | -500.0      |
|             | dof       | Y           |
|             | dm        | W           |
|             | dmm       | 10000       |
|             | dmf       | n           |
|             | dseq      | 1.0         |
| ACQUISITION | dfreq     | 125.795     |
|             | dn        | C13         |
|             | at        | 1.736       |
|             | np        | 131010      |
|             | sw        | 37735.8     |
|             | fb        | not used    |
|             | bs        | 8           |
|             | ss        | 1           |
|             | tpwr      | 53          |
|             | pw        | 6.8         |
|             | d1        | 0.763       |
|             | tof       | 631.4       |
|             | nt        | 1.11111e+06 |
|             | ct        | 14944       |
|             | atock     | n           |
|             | gain      | 60          |
| FLAGS       |           |             |
| l1          | n         |             |
| in          | Y         |             |
| dp          | n         |             |
| hs          | nm        |             |
| DISPLAY     |           |             |
| sp          | -2515.8   |             |
| wp          | 30187.6   |             |
| vs          | 1144      |             |
| sc          | 0         |             |
| wc          | 250       |             |
| hzm         | 120.75    |             |
| is          | 500.00    |             |
| rfl         | 11341.6   |             |
| rfd         | 4969.7    |             |
| th          | 20        |             |
| ins         | 1.000     |             |
| at          |           |             |

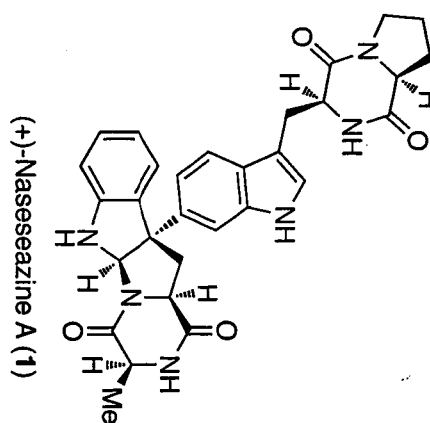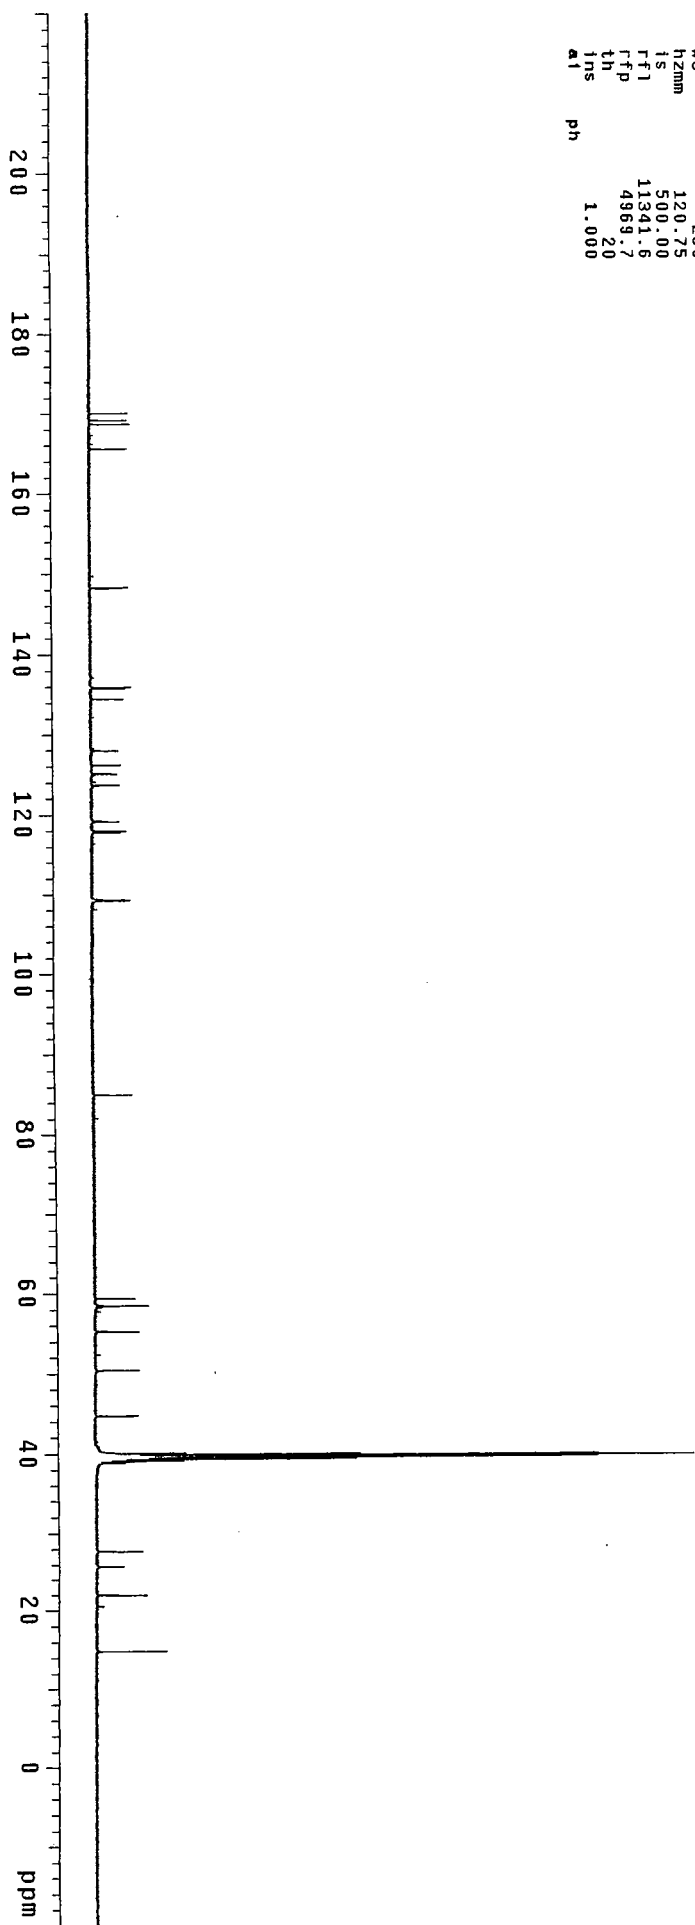

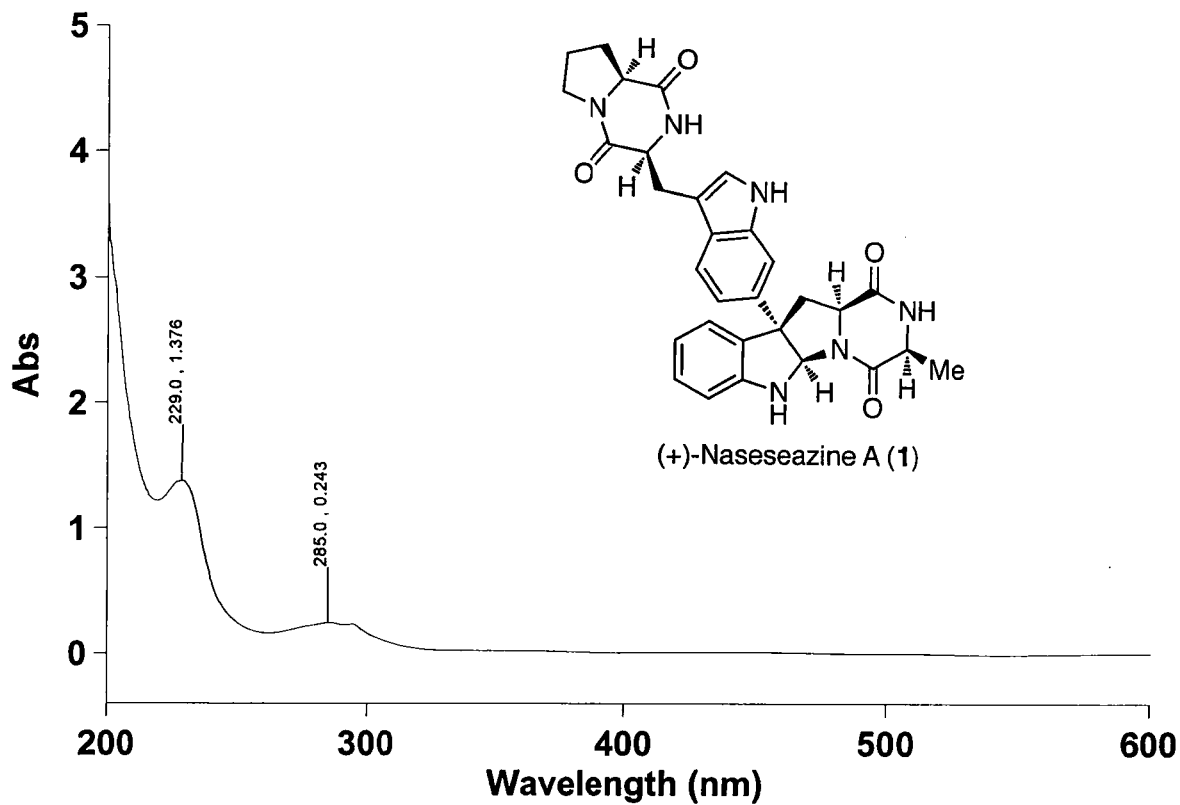

## Scan Analysis Report

### Sample Name: Naseseazine A

Peak Table  
Peak Style Peaks  
Peak Threshold 0.0100  
Range 600.0nm to 200.0nm

| Wavelength (nm) | Abs   |
|-----------------|-------|
| 285.0           | 0.243 |
| 229.0           | 1.376 |

|         |          |           |         |
|---------|----------|-----------|---------|
| SAMPLE  |          | DEC. & VT |         |
| solvent | DMSO     | dfrq      | 125.673 |
|         |          | dn        | C13     |
|         |          | dpwr      | 30      |
|         |          | do        | 0       |
|         |          | dm        | nm      |
|         |          | dmm       | w       |
|         |          | dmt       | 10000   |
|         |          | dseq      | 1.0     |
|         |          | dres      | n       |
| at      | 3.001    | homo      |         |
| np      | 63050    |           |         |
| sw      | 10504.2  | wtflte    | ft      |
| fd      | not used | proc      | 262144  |
| bs      | 1        | fn        | f       |
| tpwr    | 56       | math      |         |
| pw      | 8.6      | werr      |         |
| d1      | 2.000    | wexp      |         |
| tof     | 1519.5   | wbs       |         |
| nt      | 1111     | wnt       | wft     |
| ct      | 8        |           |         |
| atlock  | n        |           |         |
| gain    | not used |           |         |
| 11      | FLAGS    |           |         |
| in      | n        |           |         |
| dp      | y        |           |         |
| hs      | nm       |           |         |
| DISPLAY |          |           |         |
| sd      | -249.9   |           |         |
| wd      | 6496.6   |           |         |
| vs      | 25       |           |         |
| sc      | 0        |           |         |
| wc      | 250      |           |         |
| h2mm    | 25.99    |           |         |
| is      | 202.07   |           |         |
| rfl     | 2479.2   |           |         |
| rfp     | 1249.7   |           |         |
| th      | 100.000  |           |         |
| al      | cdc      |           |         |
|         | ph       |           |         |

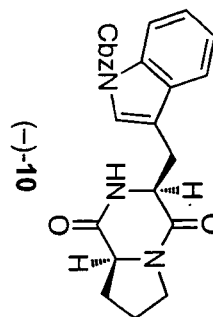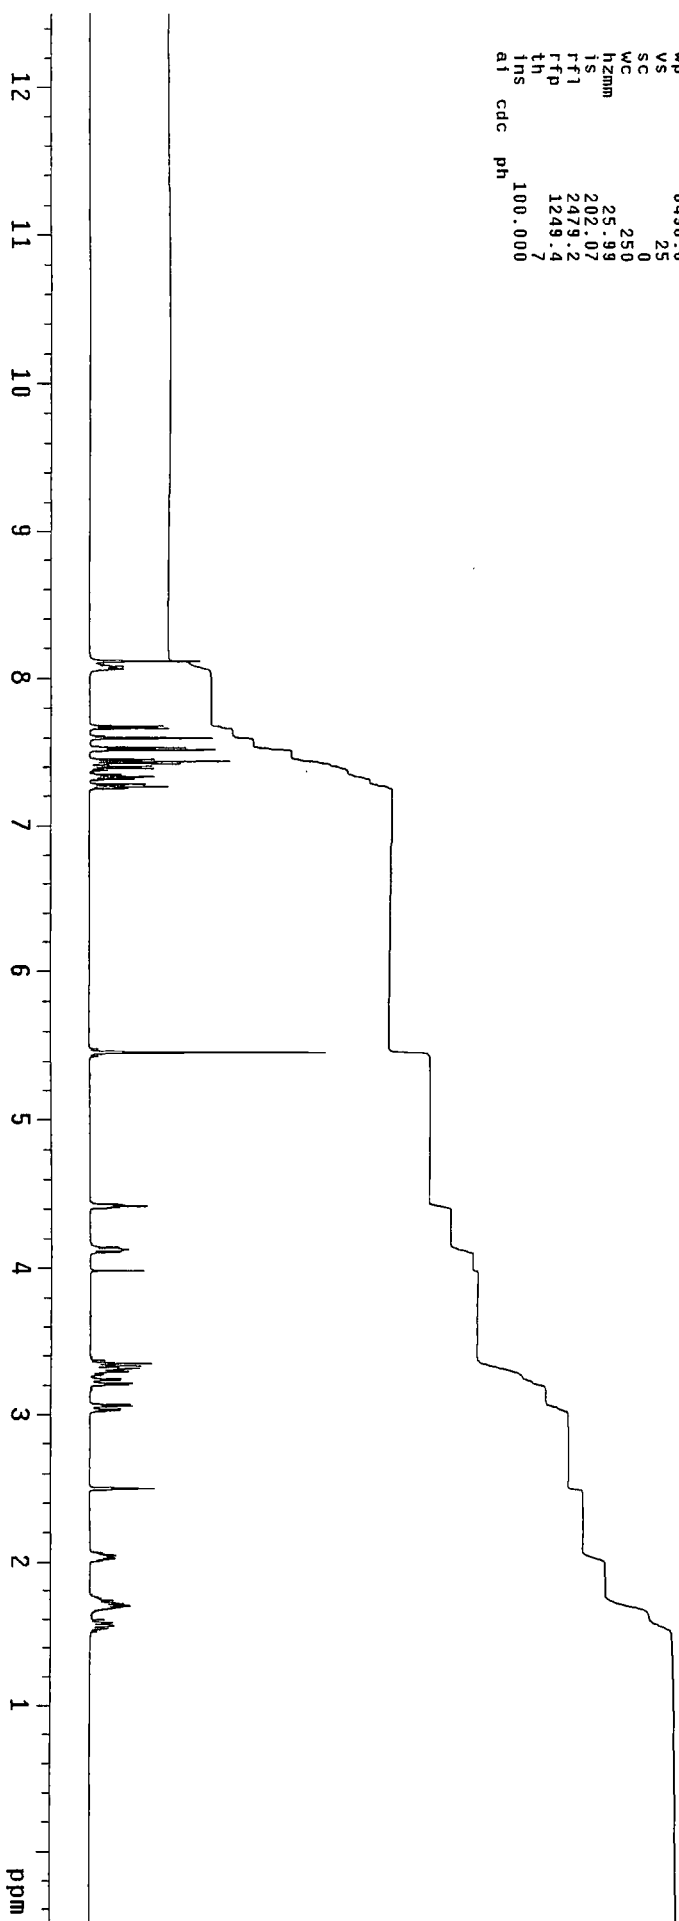



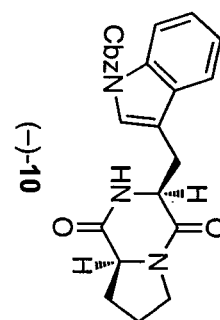

|         |      |           |         |
|---------|------|-----------|---------|
| SAMPLE  |      | DEC. & VT |         |
| solvent | DMSO | dfrq      | 500.232 |
|         |      | dn        | H1      |
|         |      | dpwr      | 37      |
|         |      | dof       | -500.0  |
|         |      | dm        | Y       |
|         |      | dmm       | W       |
|         |      | dmf       | 10000   |
|         |      | dseq      |         |
|         |      | dres      | 1.0     |
|         |      | homo      | n       |
|         |      | lb        |         |
|         |      | wfitle    | 0.30    |
|         |      | proc      | ft      |
|         |      | math      | 131072  |
|         |      |           | ‡       |

|             |             |      |
|-------------|-------------|------|
| ACQUISITION |             |      |
| sfrq        | 125.795     |      |
| tn          | C13         |      |
| at          | 1.736       |      |
| mp          | 131010      |      |
| sw          | 37735.8     |      |
| fb          | not used    |      |
| bs          | 8           |      |
| ss          | 1           |      |
| tpwr        | 53          |      |
| pw          | 6.9         |      |
| d1          | 0.763       | werr |
| tof         | 631.4       | wexp |
| nt          | 1.11111e+06 | wbs  |
| ct          | 1192        | wnt  |
| alock       | n           |      |
| gain        | 60          |      |
| FLAGS       |             |      |
| l1          | n           |      |
| in          | n           |      |
| dp          | Y           |      |
| hs          | nn          |      |
| DISPLAY     |             |      |
| sp          | -2515.8     |      |
| wp          | 30187.6     |      |
| vs          | 421         |      |
| sc          | 0           |      |
| wc          | 250         |      |
| h2mm        | 120.75      |      |
| ts          | 500.00      |      |
| rfl1        | 11343.3     |      |
| rflp        | 4989.7      |      |
| th          | 20          |      |
| ins         | 1.000       |      |
| at          |             |      |

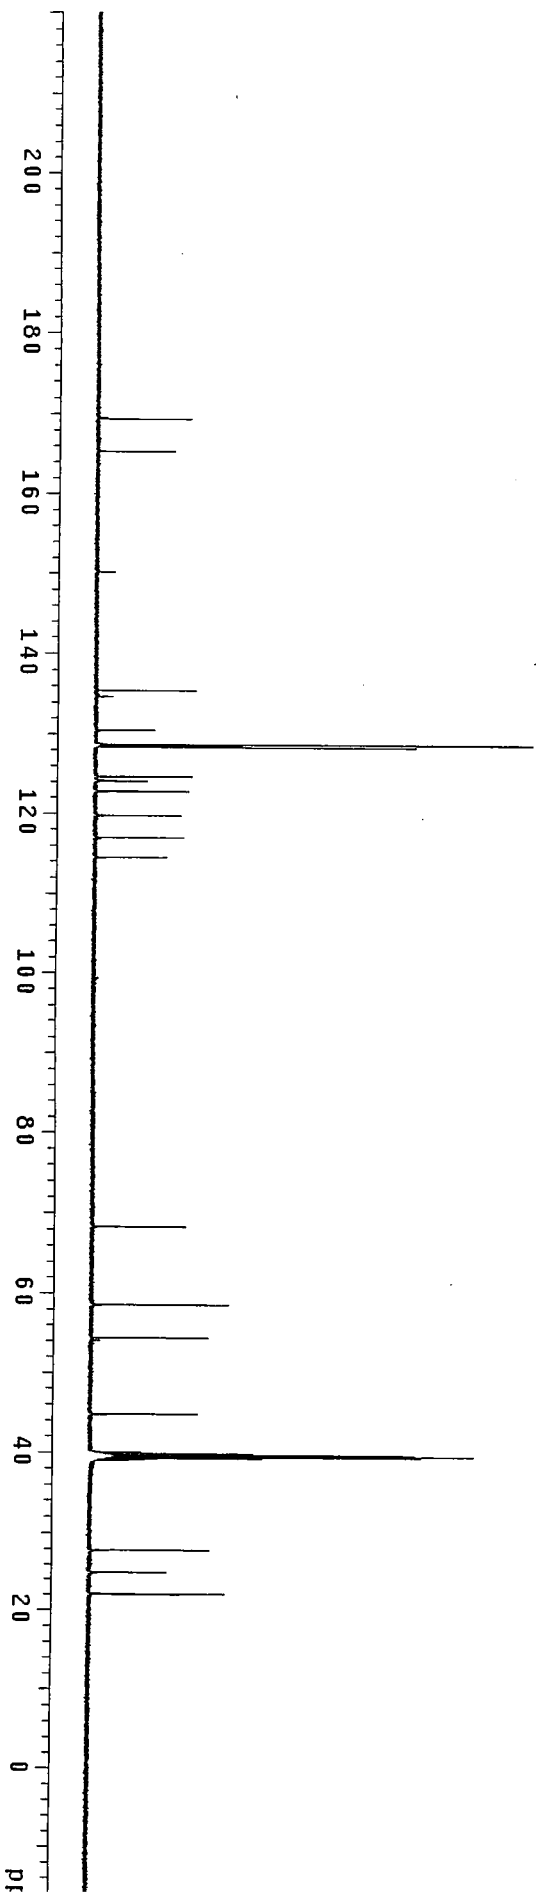

|             |          |            |         |
|-------------|----------|------------|---------|
| SAMPLE      |          | DEC. & VT  |         |
| solvent     | CDCl3    | dfrfq      | 125.672 |
|             |          | dn         | C13     |
|             |          | dpwr       | 30      |
|             |          | dof        | 0       |
|             |          | dm         | nmh     |
|             |          | dmm        | w       |
|             |          | dmf        | 10000   |
|             |          | dseq       | 1.0     |
|             |          | dres       | n       |
|             |          | homo       |         |
| ACQUISITION |          | PROCESSING |         |
| sfrq        | 499.746  | ft         | 262144  |
| tn          | H1       | fn         | f       |
| at          | 3.001    | math       |         |
| np          | 63050    | werr       |         |
| sw          | 10504.2  | wexp       |         |
| fb          | not used | wbs        |         |
| bs          | not used | wnt        |         |
| tpwr        | 56       |            |         |
| pw          | 8.6      |            |         |
| di          | 2.000    |            |         |
| tof         | 1519.5   |            |         |
| nt          | 11111    |            |         |
| ct          | 12       |            |         |
| atlock      | n        |            |         |
| gain        | not used |            |         |
| FLAGS       |          |            |         |
| il          | n        |            |         |
| in          | n        |            |         |
| dp          | y        |            |         |
| hs          | nm       |            |         |
| DISPLAY     |          |            |         |
| sp          | -249.9   |            |         |
| wp          | 6496.6   |            |         |
| vs          | 32       |            |         |
| sc          | 0        |            |         |
| wc          | 250      |            |         |
| hzm         | 25.99    |            |         |
| is          | 171.65   |            |         |
| rfp         | 1233.8   |            |         |
| th          | 0        |            |         |
| ins         | 100.000  |            |         |
| al          | cdc      |            |         |
| ph          |          |            |         |

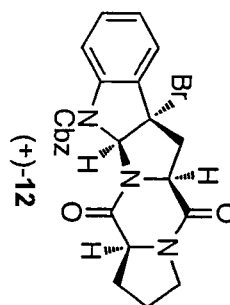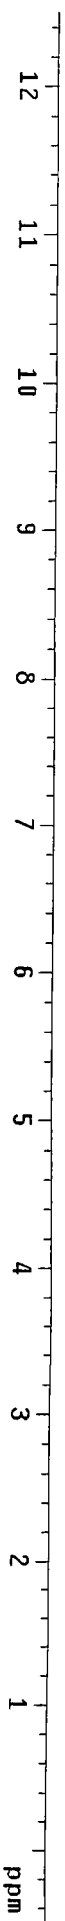

|             |          |           |
|-------------|----------|-----------|
| SAMPLE      |          | DEC. & VT |
| solvent     | CDCl3    | 500.229   |
|             |          | H1        |
|             |          | 37        |
|             |          | -500.0    |
|             |          | Y         |
|             |          | W         |
|             |          | 10000     |
| ACQUISITION |          |           |
| sfrq        | 125.795  |           |
| tn          | C13      |           |
| at          | 1.736    | 1.0       |
| np          | 131010   | n         |
| sw          | 37735.8  |           |
| fb          | not used |           |
| bs          |          |           |
| ss          | 8        | ft        |
| tpwr        | 1        | fn        |
| pw          | 53       | math      |
| dl          | 6.9      |           |
| tof         | 0.763    | warr      |
| nt          | 631.4    | wexp      |
| ct          | 11111    | wps       |
| atlock      | 64       | wnt       |
| gain        | n        |           |
| FLAGS       |          |           |
| l1          | n        |           |
| in          | n        |           |
| dp          | Y        |           |
| hs          | nm       |           |
| DISPLAY     |          |           |
| sp          | -2515.9  |           |
| wp          | 30187.9  |           |
| vs          | 87       |           |
| sc          | 0        |           |
| wc          | 250      |           |
| hzhmm       | 120.75   |           |
| ts          | 500.00   |           |
| rfl         | 16027.5  |           |
| rfdp        | 9714.2   |           |
| th          | 20       |           |
| ins         | 1.000    |           |
| al          | ph       |           |

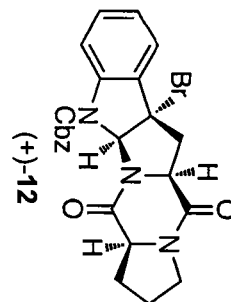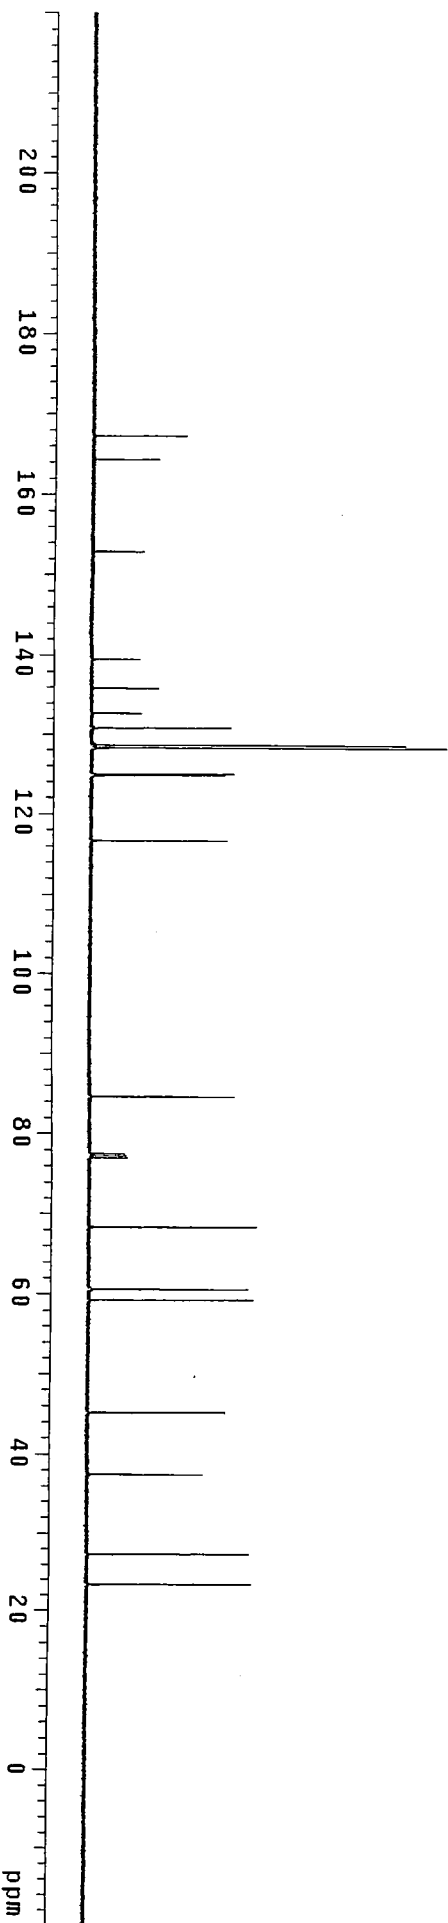

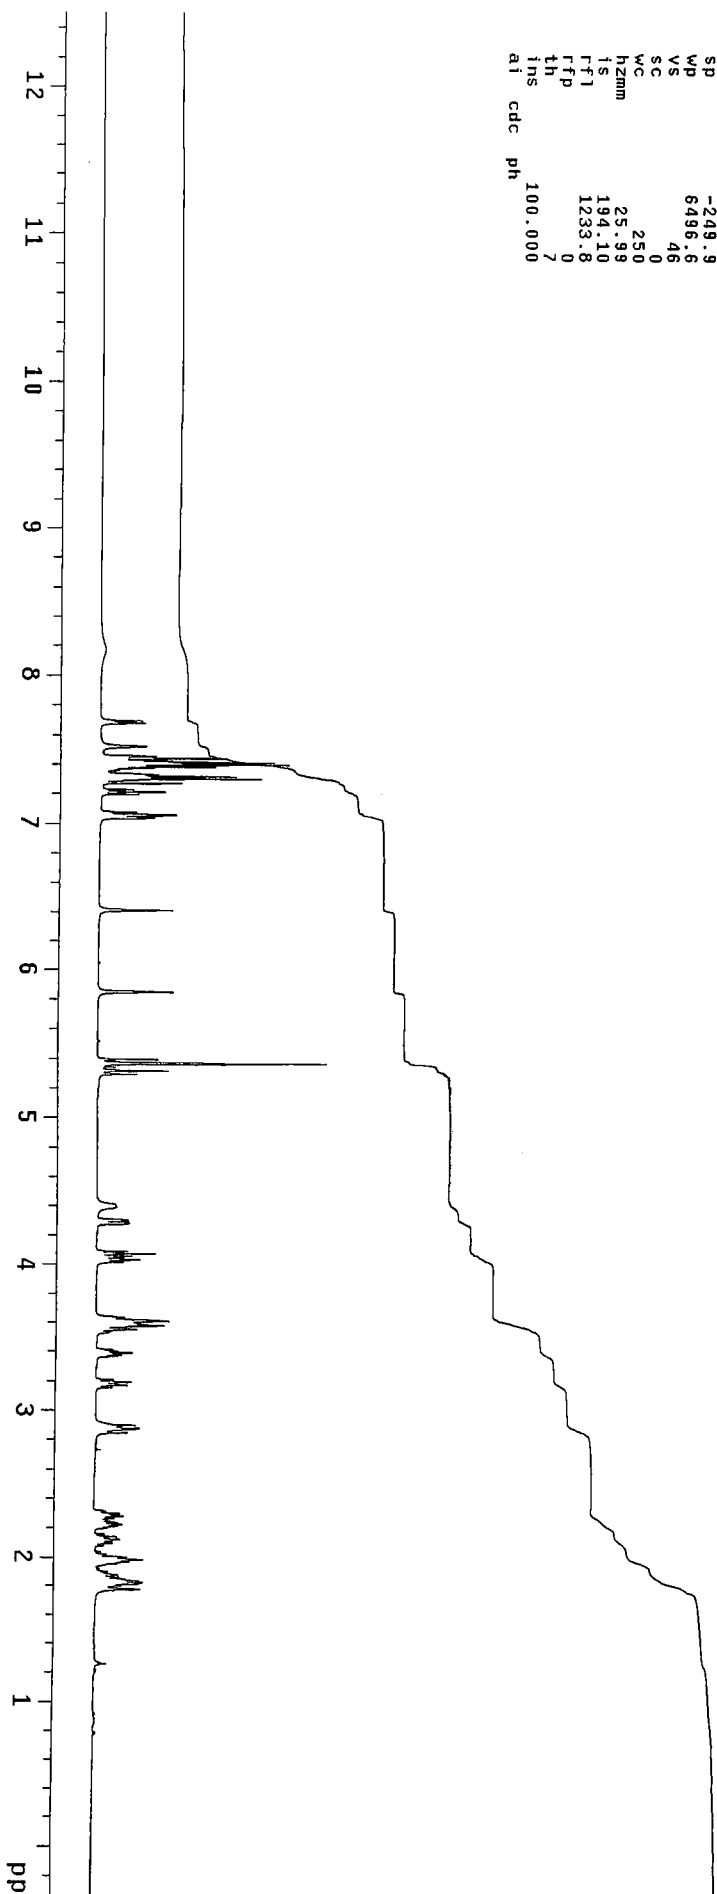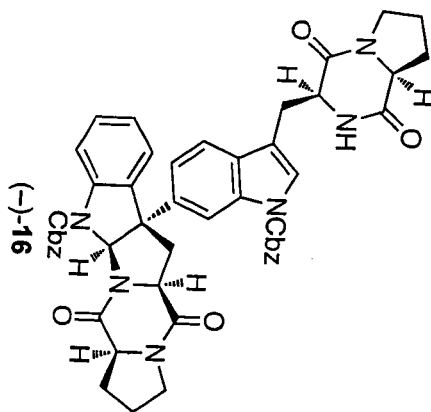

|             |          |            |         |
|-------------|----------|------------|---------|
| SAMPLE      |          | DEC. & VI  |         |
| solvent     | CDCl3    | dfreq      | 125.672 |
|             |          | dn         | 0.13    |
|             |          | dpwr       | 30      |
|             |          | dof        | 0       |
|             |          | dm         | nmn     |
|             |          | dmm        | w       |
|             |          | dmf        | 10000   |
|             |          | dres       | 1.0     |
|             |          | homo       | n       |
| ACQUISITION |          | PROCESSING |         |
| sfrq        | 499.746  | ft         | 262144  |
| tn          | H1       | fn         | f       |
| at          | 3.001    | math       |         |
| np          | 63050    | wert       |         |
| sw          | 10504.2  | wexp       |         |
| fb          | not used | wbs        |         |
| bs          | not used | wht        |         |
| tpwr        | 56       |            |         |
| pw          | 8.6      |            |         |
| dl          | 2.000    |            |         |
| tof         | 1519.3   |            |         |
| nt          | 11111    |            |         |
| ct          | 16       |            |         |
| alock       | not used |            |         |
| gain        | not used |            |         |
| fl          | n        |            |         |
| in          | n        |            |         |
| dp          | y        |            |         |
| hs          | nm       |            |         |
| DISPLAY     |          |            |         |
| sp          | -249.9   |            |         |
| wp          | 6496.6   |            |         |
| vs          | 46       |            |         |
| sc          | 0        |            |         |
| wc          | 250      |            |         |
| bzmm        | 25.98    |            |         |
| is          | 194.10   |            |         |
| rfl         | 1233.8   |            |         |
| rflp        | 0        |            |         |
| th          | 7        |            |         |
| ins         | 100.000  |            |         |
| aj          | cdc      |            |         |
|             | ph       |            |         |

|             |             |           |         |
|-------------|-------------|-----------|---------|
| SAMPLE      |             | DEC. & VT |         |
| solvent     | CDC13       | dfrq      | 500.229 |
|             |             | dn        | H1      |
|             |             | dpwr      | 37      |
|             |             | dof       | -500.0  |
|             |             | dm        | Y       |
|             |             | dmf       | W       |
|             |             | dmf       | 10000   |
| ACQUISITION |             | dseq      | 1.0     |
| sfrq        | 125.795     | dres      | n       |
| tn          | C13         | homo      | n       |
| at          | 1.736       | lb        | 1b      |
| np          | 131010      | wf1le     | ft      |
| sw          | 3735.8      | proc      | 131072  |
| fb          | not used    |           |         |
| bs          | B           |           |         |
| ss          | 1           |           |         |
| tpwr        | 53          |           |         |
| pw          | 6.9         | math      |         |
| dl          | 0.763       | werr      |         |
| tof         | 631.4       | wexp      |         |
| nt          | 1.11111e+06 | wbs       |         |
| ct          | 14733       | wrt       |         |
| atock       | n           |           |         |
| gatin       | 60          |           |         |
| FLAGS       |             |           |         |
| l1          | n           |           |         |
| ln          | n           |           |         |
| dp          | Y           |           |         |
| hs          | nm          |           |         |
| DISPLAY     |             |           |         |
| sp          | -2515.9     |           |         |
| wp          | 30187.6     |           |         |
| vs          | 3546        |           |         |
| sc          | 0           |           |         |
| wc          | 250         |           |         |
| hzm         | 120.75      |           |         |
| is          | 500.00      |           |         |
| rfl         | 16003.9     |           |         |
| rfd         | 9714.2      |           |         |
| th          | 20          |           |         |
| ins         | 1.000       |           |         |
| al          |             |           |         |

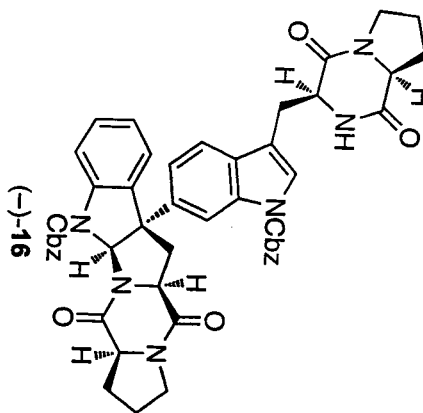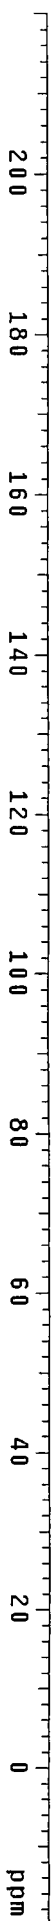

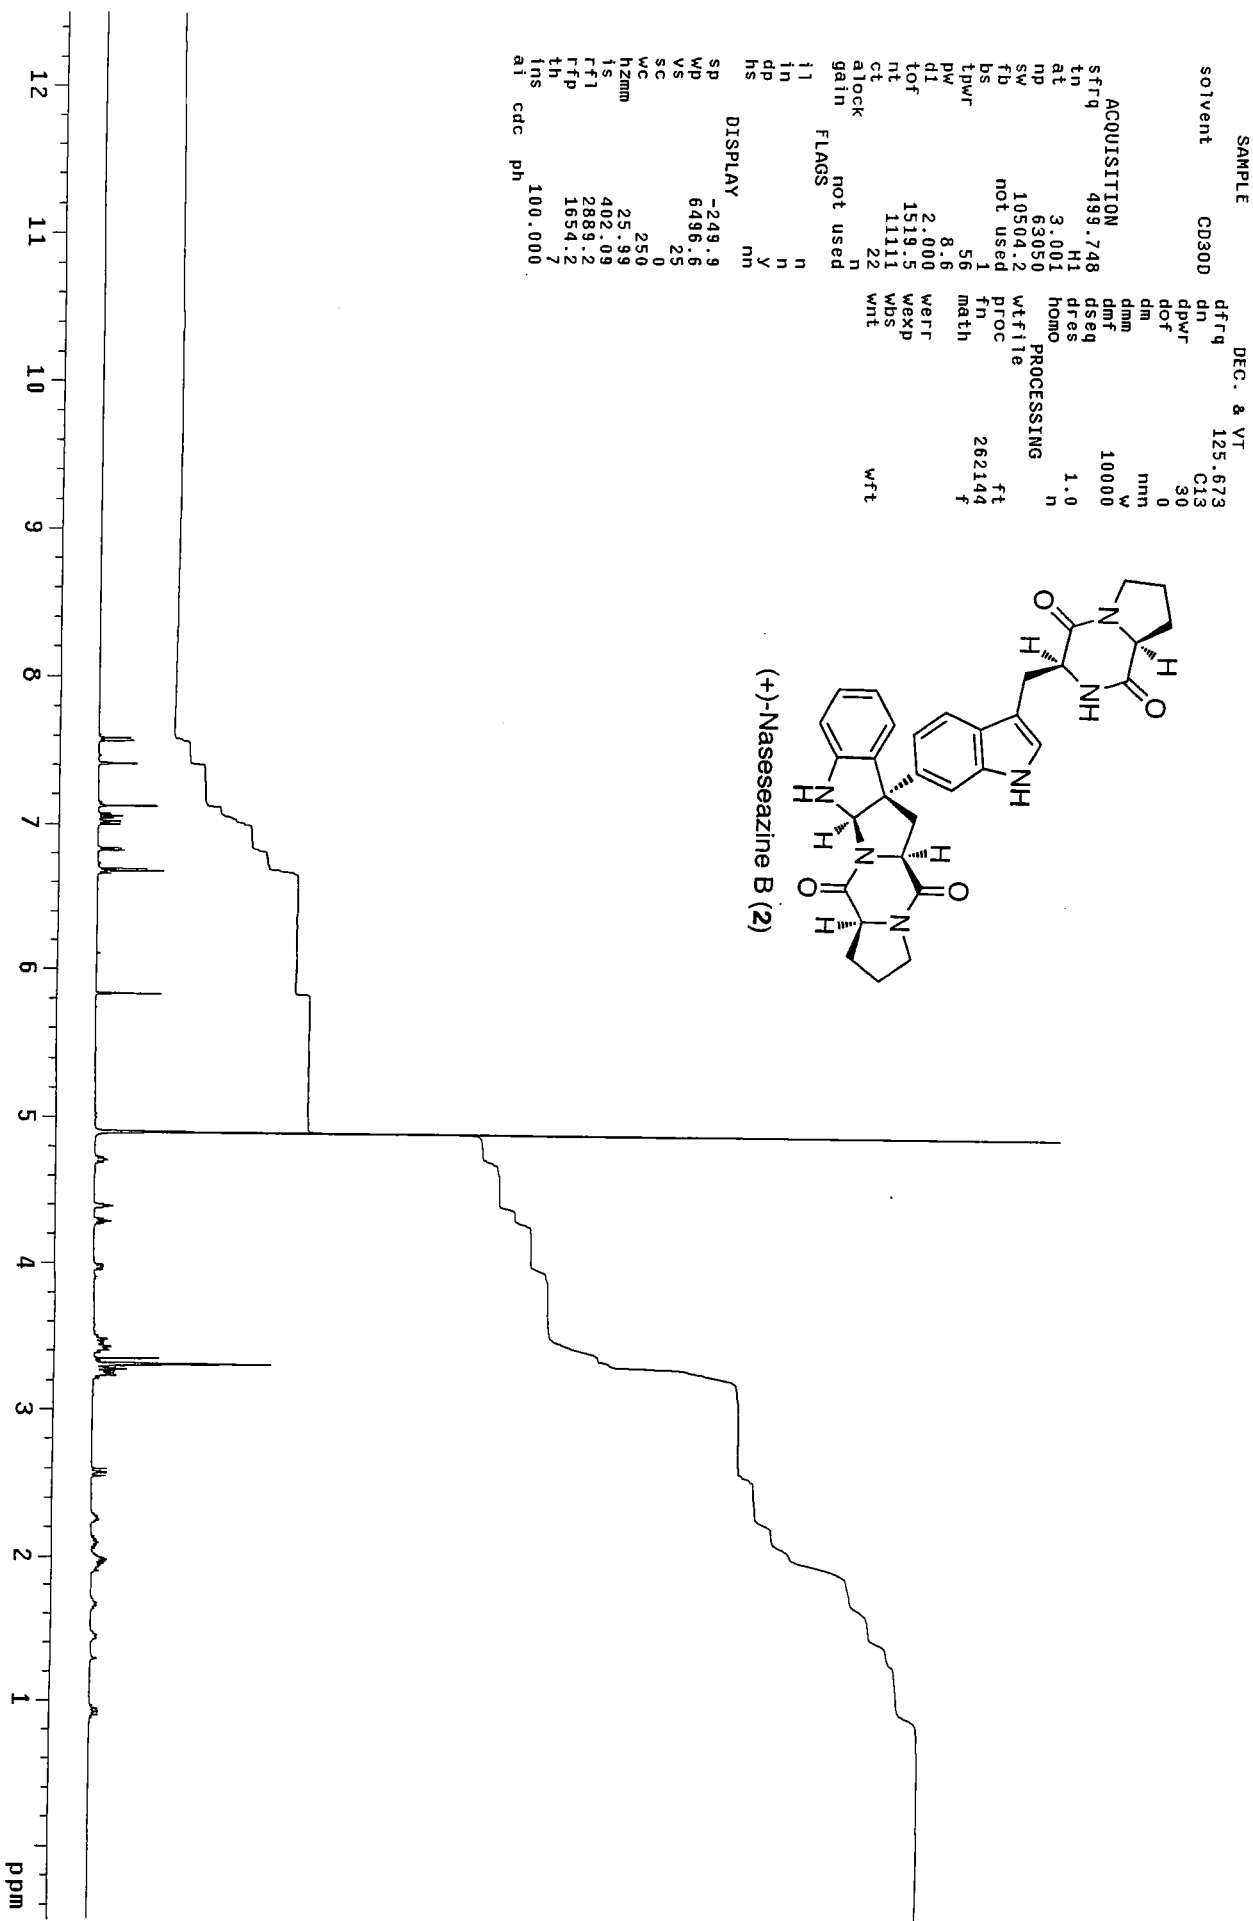

|             |          |            |         |
|-------------|----------|------------|---------|
| SAMPLE      |          | DEC. & VT  |         |
| solvent     | CD300    | dfrq       | 500.231 |
|             |          | dn         | H1      |
|             |          | dpwr       | 37      |
|             |          | dof        | -500.0  |
|             |          | dm         | Y       |
|             |          | dmm        | W       |
|             |          | dmr        | 10000   |
|             |          | dseq       | 1.0     |
|             |          | dr         | n       |
| ACQUISITION |          | PROCESSING |         |
| sfrq        | 125.795  | lb         | 0.30    |
| tn          | C13      | wfite      | ft      |
| at          | 1.736    | proc       | 131072  |
| np          | 131010   |            |         |
| sw          | 37735.8  |            |         |
| fb          | not used |            |         |
| bs          | q        |            |         |
| ss          | 1        |            |         |
| tpwr        | 53       |            |         |
| pw          | 6.9      |            |         |
| dl          | 0.763    |            |         |
| tof         | 631.4    |            |         |
| nt          | 111111   |            |         |
| ct          | 0        |            |         |
| alock       | n        |            |         |
| gain        | 60       |            |         |
| FLAGS       |          |            |         |
| l1          | n        |            |         |
| in          | Y        |            |         |
| dp          | n        |            |         |
| hs          | nm       |            |         |
| DISPLAY     |          |            |         |
| sp          | -2515.9  |            |         |
| wp          | 30187.6  |            |         |
| vs          | 1282     |            |         |
| sc          | 0        |            |         |
| wc          | 250      |            |         |
| hzmm        | 120.75   |            |         |
| is          | 500.00   |            |         |
| rf1         | 12900.9  |            |         |
| rfp         | 8182.2   |            |         |
| th          | 20       |            |         |
| ins         | 1.000    |            |         |
| at          | ph       |            |         |

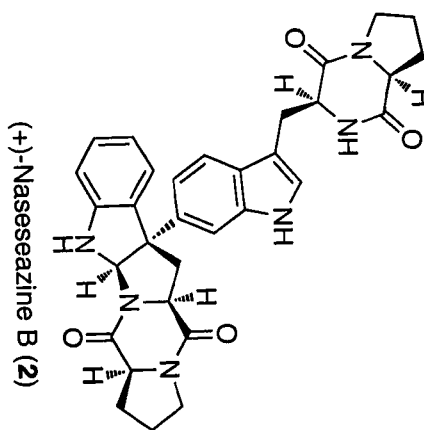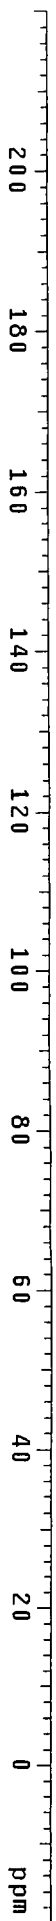

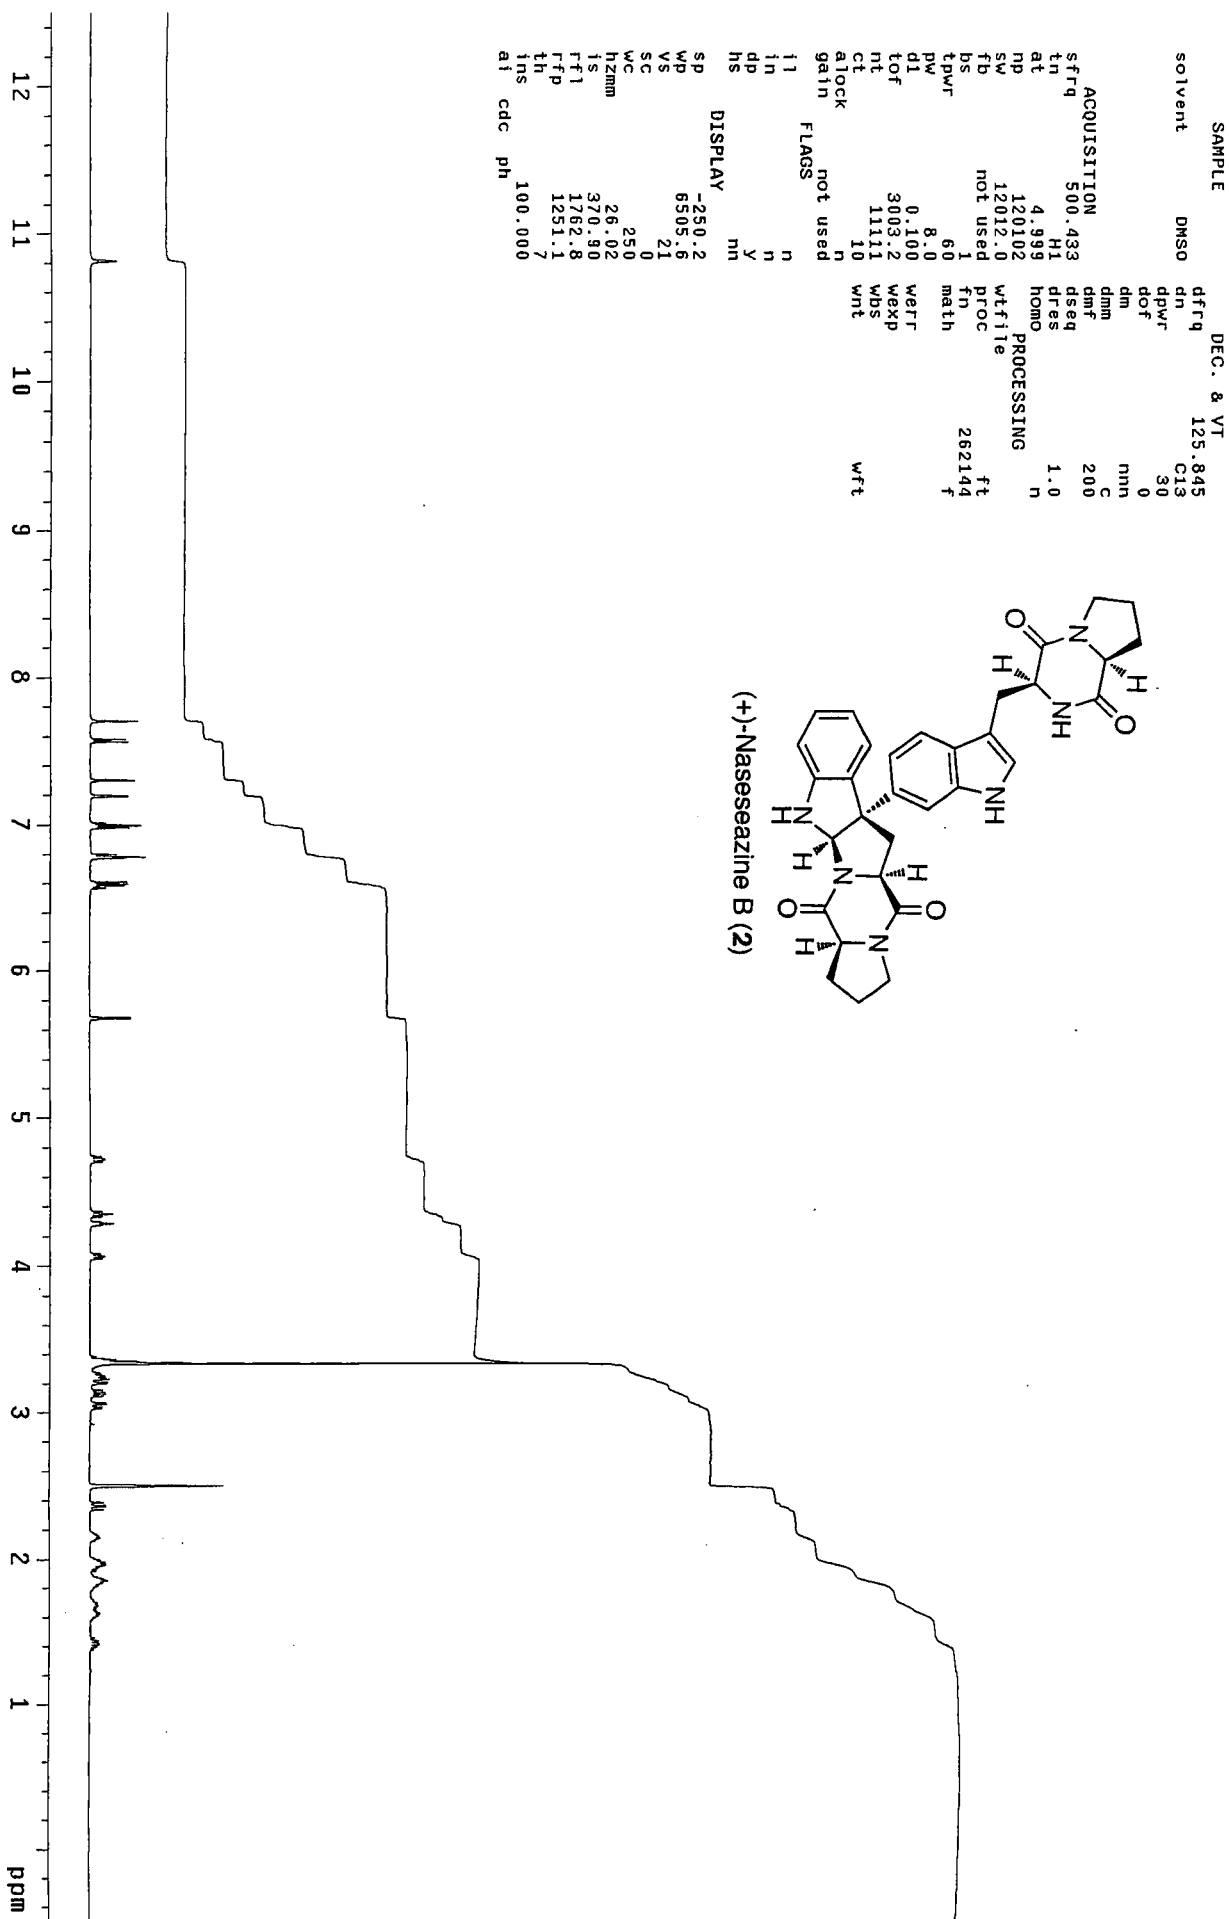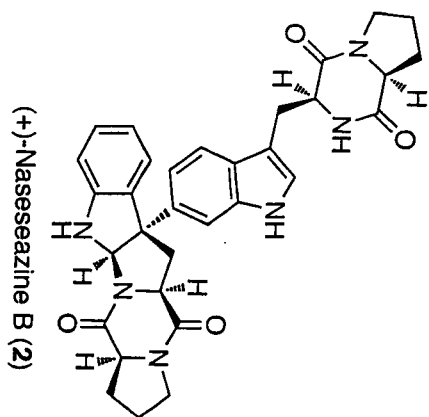









|             |             |            |
|-------------|-------------|------------|
| SAMPLE      |             | DEC. & VT  |
| solvent     | CDCl3       | 500.229    |
|             | dn          | H1         |
|             | dpwr        | 37         |
|             | dof         | -500.0     |
|             | dm          | Y          |
|             | dmm         | W          |
|             | dmf         | 10000      |
|             | dseq        | 1.0        |
|             | dres        | n          |
|             | homo        | n          |
| ACQUISITION |             | PROCESSING |
| sfreq       | 125.795     | 2.00       |
| tn          | C13         | ft         |
| at          | 1.736       | ft         |
| np          | 131010      | 131072     |
| sw          | 37735.8     | f          |
| fb          | not used    |            |
| bs          | 8           |            |
| ss          | 1           |            |
| tpwr        | 53          |            |
| pw          | 6.9         |            |
| di          | 0.763       |            |
| tof         | 631.4       |            |
| nt          | 1.11111e+07 |            |
| ct          | 1880        |            |
| atlock      | n           |            |
| gain        | 60          |            |
| FLAGS       |             |            |
| il          | n           |            |
| in          | n           |            |
| dp          | Y           |            |
| hs          | mn          |            |
| DISPLAY     |             |            |
| sp          | -2515.9     |            |
| wp          | 30187.6     |            |
| vs          | 2083        |            |
| vc          | 0           |            |
| wc          | 250         |            |
| hzmm        | 120.75      |            |
| is          | 500.00      |            |
| rf1         | 16003.9     |            |
| rfp         | 9714.2      |            |
| ths         | 5           |            |
| ins         | 1.000       |            |
| al          |             |            |

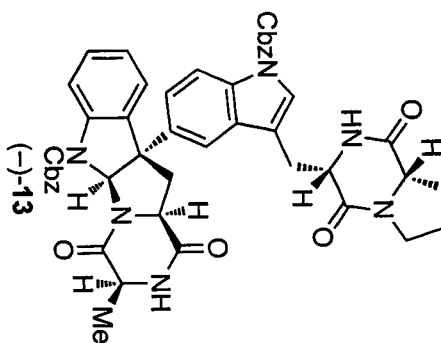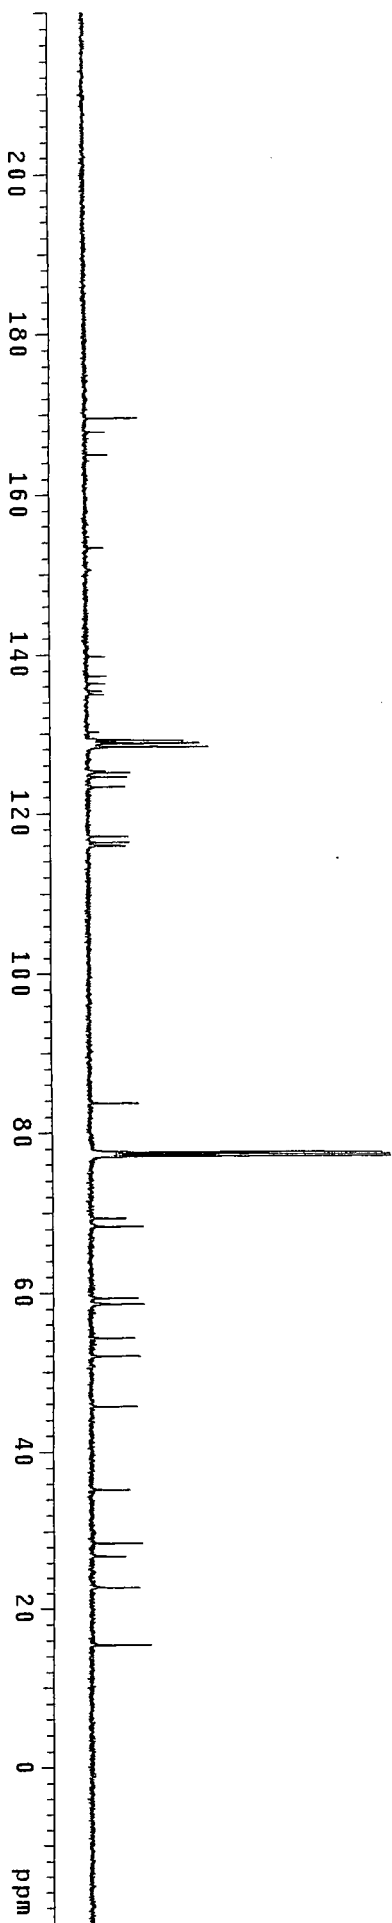

|             |          |           |         |
|-------------|----------|-----------|---------|
| SAMPLE      |          | DEC. & VT |         |
| solvent     | CD3OD    | dfrq      | 125.844 |
|             |          | dn        | C13     |
|             |          | dpwr      | 30      |
|             |          | dof       | 0       |
|             |          | dm        | nmn     |
|             |          | dmm       | C       |
|             |          | dmt       | 200     |
|             |          | dseq      | 1.0     |
|             |          | dres      | n       |
|             |          | homo      | n       |
| ACQUISITION |          |           |         |
| sfrq        | 500.433  |           |         |
| tn          | 4.939    |           |         |
| at          | H1       |           |         |
| mp          | 120102   |           |         |
| sw          | 12012.0  |           |         |
| fd          | not used | wf file   | ft      |
| bs          | 1        | proc      | 262144  |
| tpwr        | 60       | fn        |         |
|             |          | math      |         |
| pw          | 8.0      |           |         |
| d1          | 0.100    | werr      |         |
| tof         | 3003.2   | wexp      |         |
| nt          | 11111    | wbs       |         |
| ct          | 36       | wrt       |         |
| atlock      | n        |           |         |
| gain        | not used |           |         |
| flags       | n        |           |         |
| i1          | n        |           |         |
| in          | Y        |           |         |
| dp          | nm       |           |         |
| hs          |          |           |         |
| DISPLAY     |          |           |         |
| sp          | -250.2   |           |         |
| wp          | 6505.5   |           |         |
| vs          | 43       |           |         |
| sc          | 0        |           |         |
| wc          | 250      |           |         |
| h2mm        | 26.02    |           |         |
| is          | 344.73   |           |         |
| r1f1        | 2168.9   |           |         |
| r1fp        | 1858.4   |           |         |
| th          | 7        |           |         |
| ins         | 100.000  |           |         |
| at          | cdc      | ph        |         |

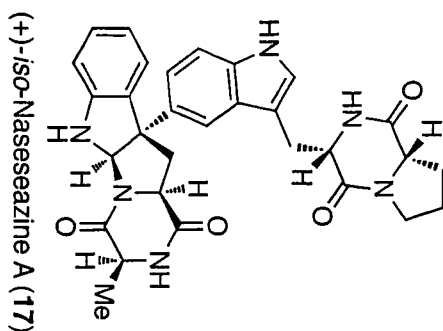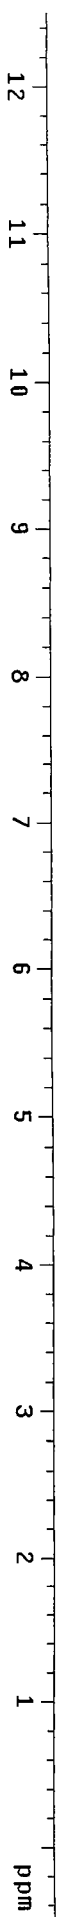

|             |          |           |
|-------------|----------|-----------|
| SAMPLE      |          | DEC. & VT |
| solvent     | CD3OD    | 500.231   |
|             |          | H1        |
|             |          | 37        |
|             |          | -500.0    |
|             |          | W         |
|             |          | Y         |
|             |          | 10000     |
|             |          | W         |
|             |          | Y         |
| ACQUISITION |          |           |
| sfrq        | 125.795  |           |
| tn          | C13      |           |
| at          | 1.736    | 1.0       |
| np          | 131010   | n         |
| sw          | 37735.8  | homo      |
| fb          | not used | 1b        |
| bs          | 8        | wf file   |
| ss          | 1        | proc      |
| tpwr        | 53       | fn        |
| pw          | 6.9      | math      |
| d1          | 0.763    | vert      |
| tof         | 631.4    | wexp      |
| nt          | 111111   | wbs       |
| ct          | 3816     | wht       |
| alock       | n        |           |
| gain        | 60       |           |
| FLAGS       |          |           |
| ii          | n        |           |
| in          | n        |           |
| dp          | Y        |           |
| ns          | nm       |           |
| DISPLAY     |          |           |
| sp          | -2515.9  |           |
| wp          | 30187.6  |           |
| vs          | 1133     |           |
| sc          | 0        |           |
| wc          | 250      |           |
| h2mm        | 120.75   |           |
| is          | 500.00   |           |
| rfl         | 12300.3  |           |
| rtp         | 6182.2   |           |
| th          | 3        |           |
| ins         |          |           |
| at          | 1.000    |           |

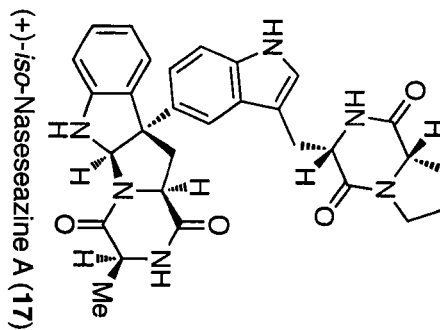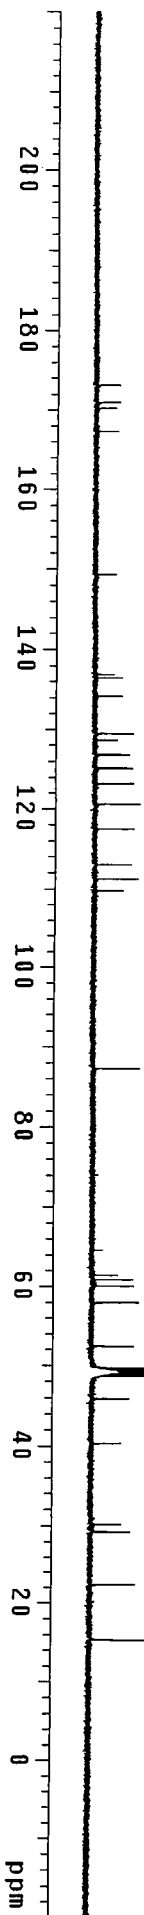

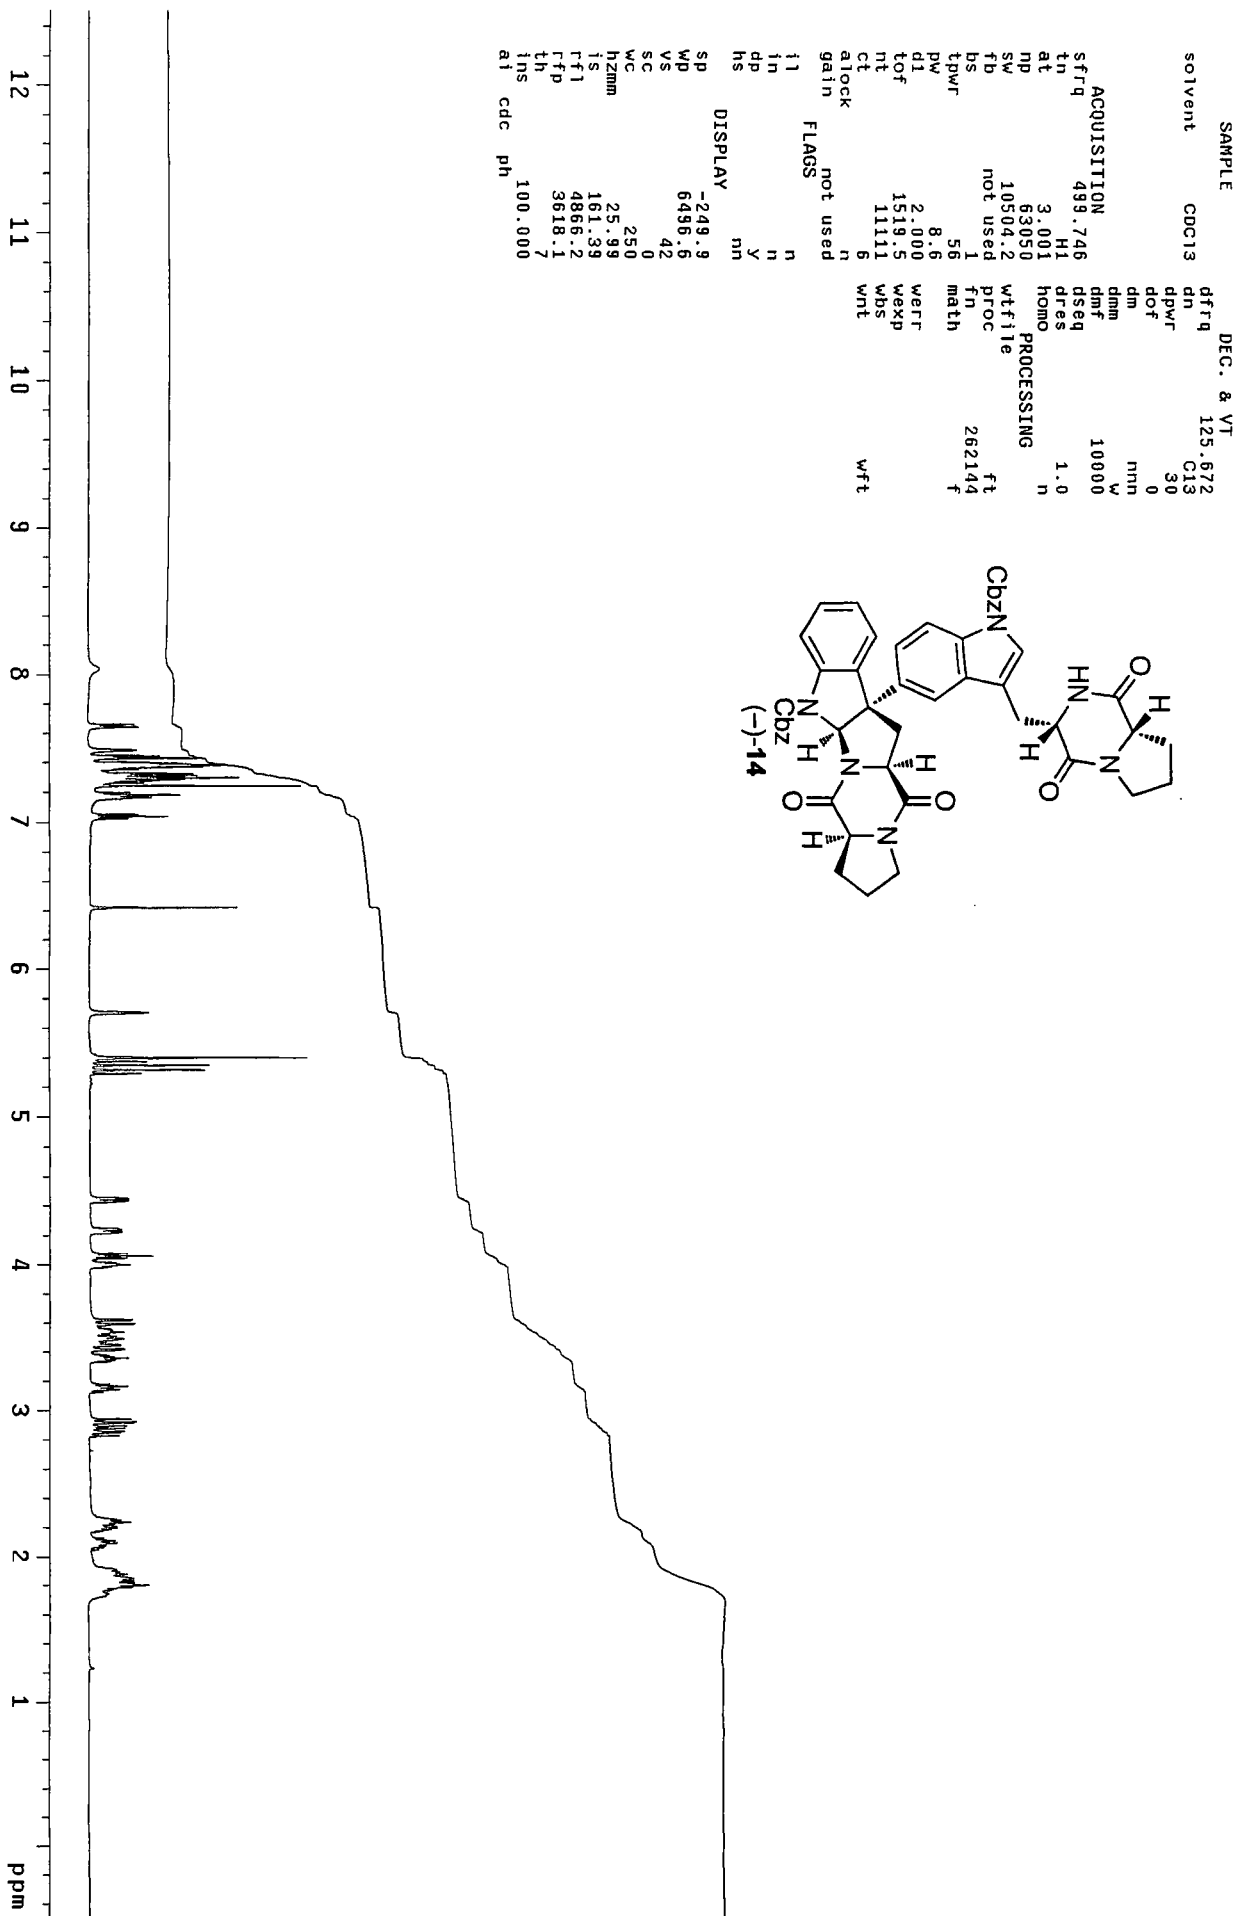





|             |          |            |
|-------------|----------|------------|
| SAMPLE      |          | DEC. & VT  |
| solvent     | CDCl3    | 125.844    |
| dfreq       | dn       | C13        |
| dpwr        | do       | 30         |
| do          | dm       | 0          |
| dm          | dm       | nnc        |
| dmf         | dmf      | C          |
| dseq        | dseq     | 200        |
| dres        | dres     | 1.0        |
| homo        | homo     | n          |
| ACQUISITION |          | PROCESSING |
| sfrq        | 500.431  | ft         |
| in          | H1       | 262144     |
| at          | 4.999    | f          |
| np          | 120102   | wfft       |
| sw          | 12012.0  | proc       |
| fb          | not used | math       |
| bs          | 1        | wrt        |
| tpwr        | 60       |            |
| pw          | 8.0      |            |
| dl          | 0.100    |            |
| tof         | 3003.2   |            |
| nt          | 111111   |            |
| ct          | 23       |            |
| atlock      | n        |            |
| gain        | not used |            |
| FLAGS       |          |            |
| l1          | n        |            |
| in          | Y        |            |
| dp          | n        |            |
| hs          | nm       |            |
| DISPLAY     |          |            |
| sp          | -250.3   |            |
| wp          | 6505.5   |            |
| vs          | 29       |            |
| sc          | 0        |            |
| wc          | 250      |            |
| hzhm        | 26.02    |            |
| is          | 349.36   |            |
| rfl         | 4147.7   |            |
| rfd         | 3623.1   |            |
| th          | 100.000  |            |
| ins         |          |            |
| dl          | cdc      |            |
| ph          |          |            |

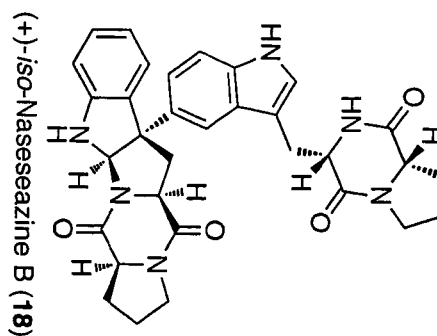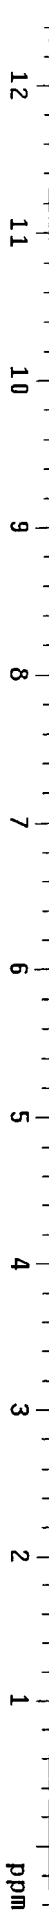

|             |            |            |         |
|-------------|------------|------------|---------|
| SAMPLE      |            | DEC. & VT  |         |
| solvent     | CDCl3      | dfrq       | 500.229 |
|             |            | dn         | H1      |
|             |            | dpwr       | 37      |
|             |            | hof        | -500.0  |
|             |            | dm         | Y       |
|             |            | dmm        | W       |
|             |            | dmg        | 10000   |
|             |            | dseq       | 1.0     |
|             |            | dres       | n       |
|             |            | homo       | n       |
| ACQUISITION |            | PROCESSING |         |
| sfrq        | 125.795    | lb         | 0.30    |
| tn          | C13        | proc       | ft      |
| at          | 1.736      | fn         | 131072  |
| np          | 131010     | math       | F       |
| sw          | 37735.8    | werr       |         |
| td          | not used   | wexp       |         |
| bs          |            | wbs        |         |
| ss          |            | wnt        |         |
| tpwr        | 6.9        |            |         |
| pw          | 0.763      |            |         |
| d1          | 631.4      |            |         |
| tof         | 1.1111e+07 |            |         |
| nt          | 17520      |            |         |
| ct          |            |            |         |
| alock       |            |            |         |
| gain        | 60         |            |         |
| i1          | n          |            |         |
| in          | n          |            |         |
| dp          | Y          |            |         |
| hs          | nm         |            |         |
| DISPLAY     |            |            |         |
| sp          | -2515.9    |            |         |
| wp          | 30187.6    |            |         |
| vs          | 1792       |            |         |
| sc          | 0          |            |         |
| wc          | 250        |            |         |
| h2mm        | 120.75     |            |         |
| is          | 500.00     |            |         |
| rfl         | 16002.2    |            |         |
| rffp        | 9714.2     |            |         |
| th          | 8          |            |         |
| ins         | 1.000      |            |         |
| at          |            |            |         |

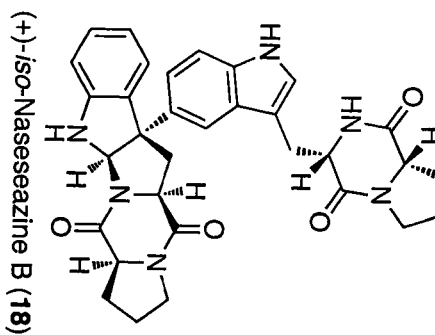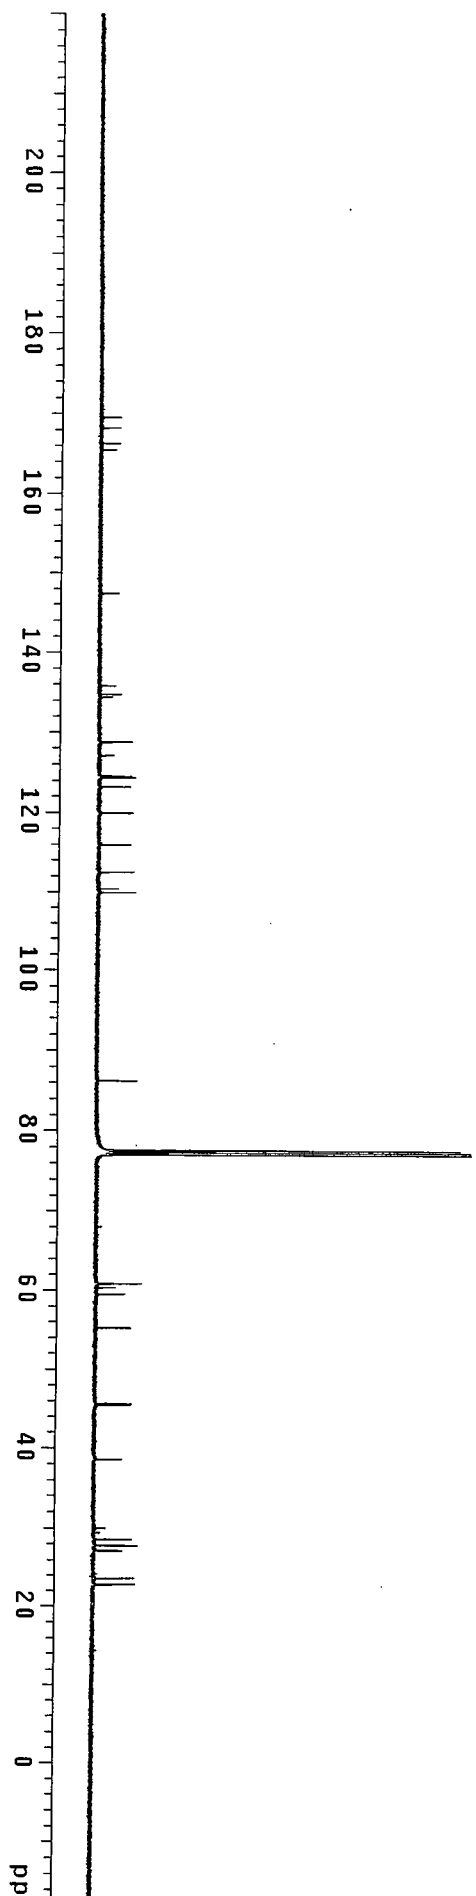

|         |       |           |
|---------|-------|-----------|
| SAMPLE  |       | DEC. & VT |
| solvent | CDCl3 | 125.672   |
|         |       | C13       |
|         |       | 30        |
|         |       | 0         |
|         |       | nmn       |
|         |       | w         |
|         |       | 10000     |
|         |       | 1.0       |
|         |       | n         |
|         |       | n         |
|         |       | 12.0      |
|         |       | f         |
|         |       | ft        |
|         |       | 262144    |
|         |       | f         |

  

|             |          |  |
|-------------|----------|--|
| ACQUISITION |          |  |
| sfrq        | 499.746  |  |
| in          | H1       |  |
| at          | 3.001    |  |
| np          | 63050    |  |
| sw          | 10504.2  |  |
| fb          | not used |  |
| bs          | 1        |  |
| tpwr        | 56       |  |
| pw          | 8.6      |  |
| d1          | 2.000    |  |
| tof         | 1519.5   |  |
| nt          | 1        |  |
| ct          | 1        |  |
| atlock      | 1        |  |
| gain        | not used |  |
| flags       | not used |  |
| i1          | n        |  |
| in          | n        |  |
| dp          | y        |  |
| hs          | nh       |  |

  

|         |         |  |
|---------|---------|--|
| DISPLAY |         |  |
| sp      | -249.9  |  |
| wd      | 6486.6  |  |
| vs      | 15      |  |
| sc      | 1       |  |
| vc      | 0       |  |
| hzm     | 250     |  |
| hzm     | 25.99   |  |
| rs      | 260.28  |  |
| rfl     | 4865.2  |  |
| rfl     | 3618.1  |  |
| th      | 100.000 |  |
| ins     | 100.000 |  |
| ai      | cdc     |  |
|         | ph      |  |

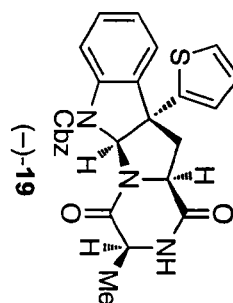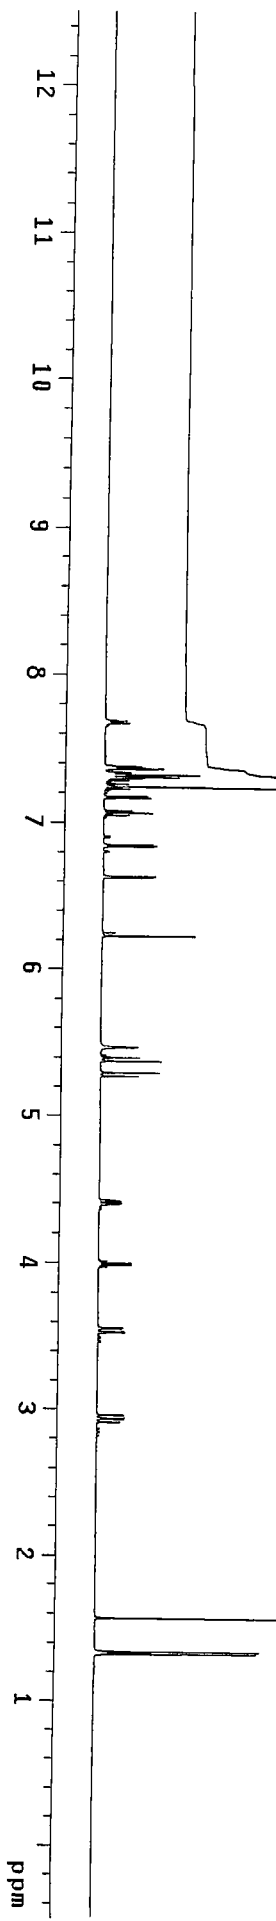

|             |          |            |         |
|-------------|----------|------------|---------|
| SAMPLE      |          | DEC. & VT  | 500.229 |
| solvent     | CDCl3    | dn         | H1      |
|             |          | dpwr       | 37      |
|             |          | doF        | -500.0  |
|             |          | dm         | Y       |
|             |          | dmm        | W       |
|             |          | dms        | 10000   |
|             |          | dseq       | 1.0     |
|             |          | dres       | n       |
| ACQUISITION |          | PROCESSING | 0.30    |
| sfrq        | 125.795  | homo       | n       |
| tn          | C13      | lb         | 1       |
| at          | 1.736    | wtfile     | 131072  |
| np          | 131010   | proc       | f       |
| sw          | 37235.8  |            |         |
| fb          | not used |            |         |
| bs          | 8        |            |         |
| ss          | 53       |            |         |
| tpwr        | 6.9      |            |         |
| pw          | 0.763    |            |         |
| dl          | 631.4    |            |         |
| tof         | 11111    |            |         |
| nt          | 128      |            |         |
| ct          | n        |            |         |
| atock       | n        |            |         |
| gain        | 60       |            |         |
| FLAGS       |          |            |         |
| i1          | n        |            |         |
| in          | Y        |            |         |
| dp          | Y        |            |         |
| hs          | nm       |            |         |
| DISPLAY     |          |            |         |
| sp          | -2515.9  |            |         |
| wp          | 30187.6  |            |         |
| vs          | 330      |            |         |
| sc          | 0        |            |         |
| wc          | 250      |            |         |
| h2mm        | 120.75   |            |         |
| is          | 500.00   |            |         |
| rfl         | 16006.2  |            |         |
| rffp        | 9714.2   |            |         |
| tn          | 1.000    |            |         |
| ins         |          |            |         |
| at          |          |            |         |

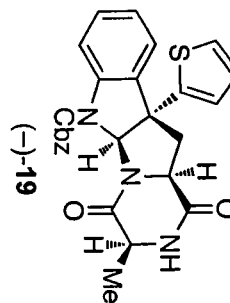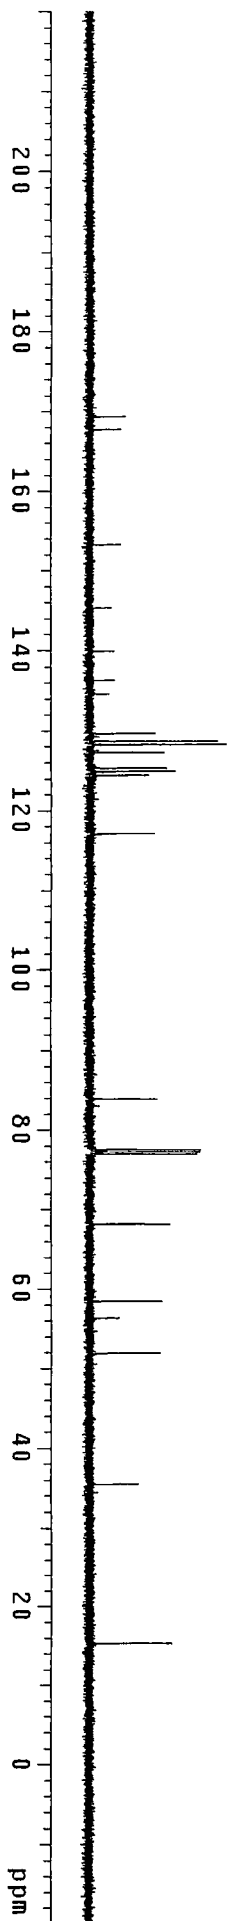



|         |       |            |
|---------|-------|------------|
| SAMPLE  |       | DEC. & VT  |
| solvent | CDCl3 | 500.229    |
|         |       | H1         |
|         |       | 37         |
|         |       | -500.0     |
|         |       | dm         |
|         |       | Y          |
|         |       | W          |
|         |       | 100000     |
|         |       | dmf        |
|         |       | 1.0        |
|         |       | n          |
|         |       | PROCESsing |
|         |       | 0.30       |
|         |       | ft         |
|         |       | 131072     |
|         |       | f          |

  

|             |             |
|-------------|-------------|
| ACQUISITION |             |
| sfrq        | 125.795     |
| tn          | C13         |
| at          | 1.736       |
| np          | 131010      |
| sw          | 37735.8     |
| fb          | not used    |
| bs          | 8           |
| ss          | 1           |
| tpwr        | 53          |
| pw          | 6.9         |
| d1          | 0.753       |
| tof         | 631.4       |
| nt          | 1.11111e+06 |
| ct          | 2048        |
| atock       | n           |
| gain        | 60          |

  

|       |    |
|-------|----|
| FLAGS |    |
| l1    | n  |
| in    | n  |
| dp    | Y  |
| hs    | nm |

  

|         |         |
|---------|---------|
| DISPLAY |         |
| sp      | -2515.9 |
| wp      | 30187.6 |
| vs      | 739     |
| sc      | 0       |
| wc      | 250     |
| h2mm    | 120.75  |
| is      | 500.00  |
| rfl     | 16003.9 |
| rfp     | 9714.2  |
| th      | 20      |
| ins     | 1.000   |
| al      | ph      |

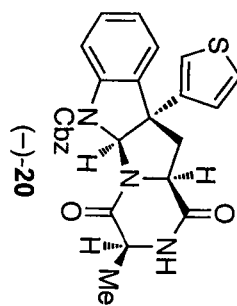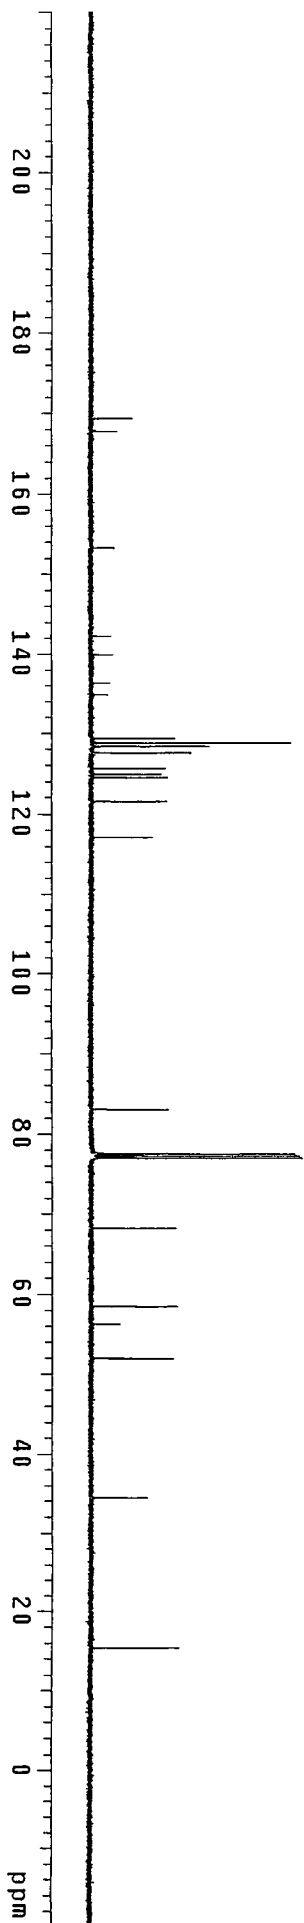

|             |          |            |         |
|-------------|----------|------------|---------|
| SAMPLE      |          | DEC. & VT  |         |
| solvent     | CDCl3    | dfreq      | 125.672 |
|             |          | dn         | C13     |
|             |          | dpwr       | 30      |
|             |          | dof        | 0       |
|             |          | dm         | nmn     |
|             |          | dmm        | w       |
|             |          | dmt        | 10000   |
|             |          | dseq       | 1.0     |
|             |          | dres       | n       |
|             |          | homo       | n       |
| ACQUISITION |          | PROCESSING |         |
| sfrq        | 499.746  | wtfile     | ft      |
| tn          | H1       | fn         | 262144  |
| at          | 3.001    | proc       | †       |
| mp          | 63050    |            |         |
| sw          | 105004.2 |            |         |
| fd          | not used |            |         |
| bs          | 1        |            |         |
| tpwr        | 56       |            |         |
| pw          | 8.6      |            |         |
| d1          | 2.000    |            |         |
| tof         | 1519.5   |            |         |
| nt          | 11111    |            |         |
| ct          | 11111    |            |         |
| atock       | 4        |            |         |
| gain        | not used |            |         |
|             |          | wft        |         |
| DISPLAY     |          |            |         |
| sp          | -249.9   |            |         |
| wd          | 6496.6   |            |         |
| vs          | 19       |            |         |
| sc          | 0        |            |         |
| wc          | 250      |            |         |
| h2mm        | 25.99    |            |         |
| is          | 167.45   |            |         |
| rfl         | 4865.2   |            |         |
| rff         | 3618.1   |            |         |
| th          | 100.000  |            |         |
| als         | cdc      |            |         |
| al          | ph       |            |         |

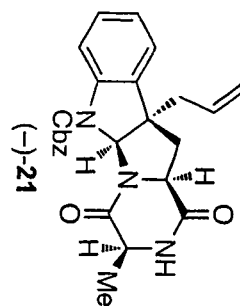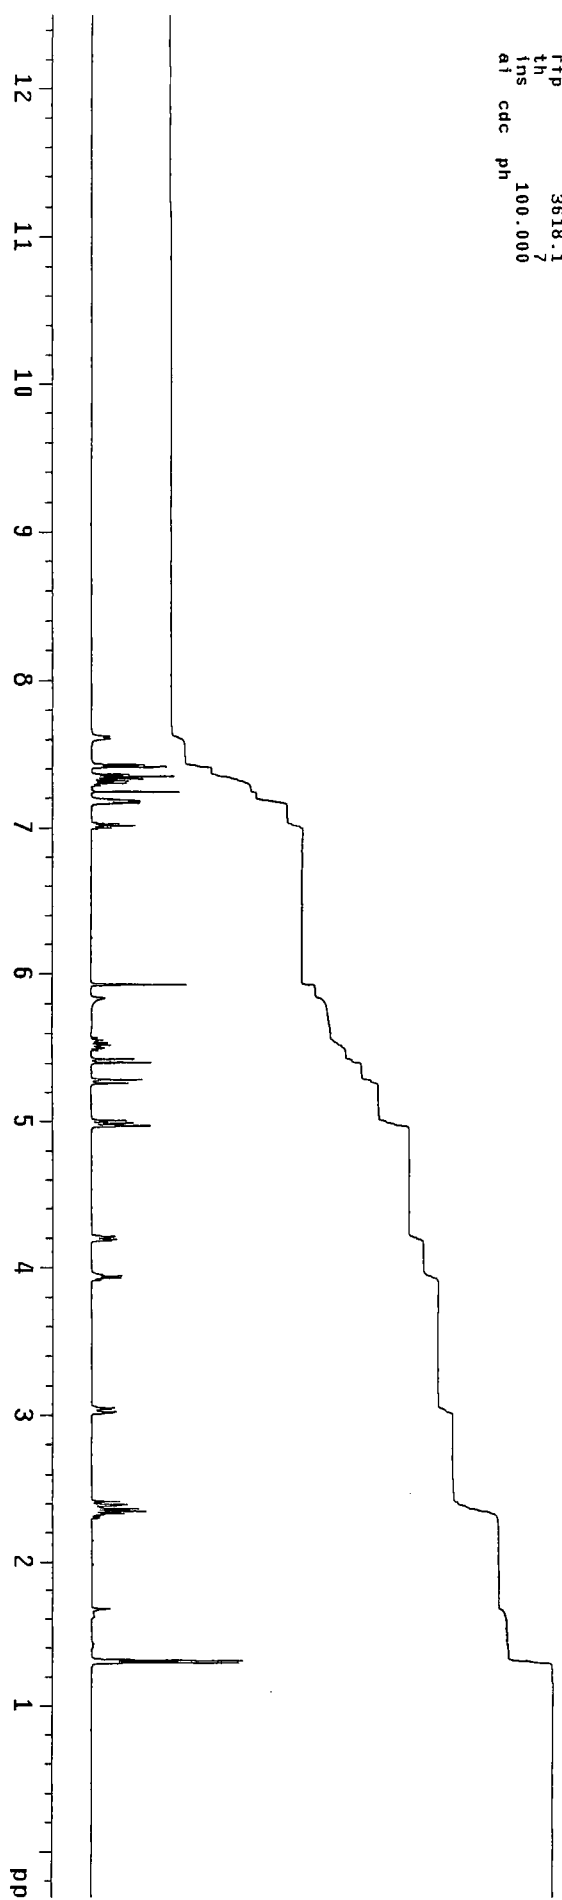

|         |         |           |
|---------|---------|-----------|
| SAMPLE  |         | DEC. & VT |
| solvent | CDCl3   | 500.229   |
| dfreq   | 500.229 | H1        |
| dn      | 37      | dpwr      |
| dpwr    | -500.0  | dof       |
| dof     | Y       | dm        |
| dm      | W       | dmm       |
| dmm     | 10000   | dmf       |
| dmf     | W       | dres      |
| dres    | 1.0     | hom       |
| hom     | n       | proc      |
| proc    | 0.30    | wtfile    |
| wtfile  | ft      | ft        |
| ft      | 131072  | math      |
| math    | 60      | gain      |
| gain    | n       | flags     |
| flags   | n       | in        |
| in      | Y       | dp        |
| dp      | nm      | hs        |
| hs      | nm      | display   |
| display | -2515.9 | sp        |
| sp      | 30187.6 | wp        |
| wp      | 422     | vs        |
| vs      | 0       | sc        |
| sc      | 0       | wc        |
| wc      | 120.75  | hzmm      |
| hzmm    | 500.00  | is        |
| is      | 16005.0 | rfl       |
| rfl     | 9714.2  | rffp      |
| rffp    | 20      | th        |
| th      | 1.000   | lre       |
| lre     |         | ph        |
| ph      |         |           |

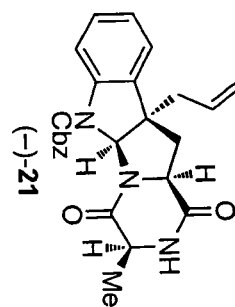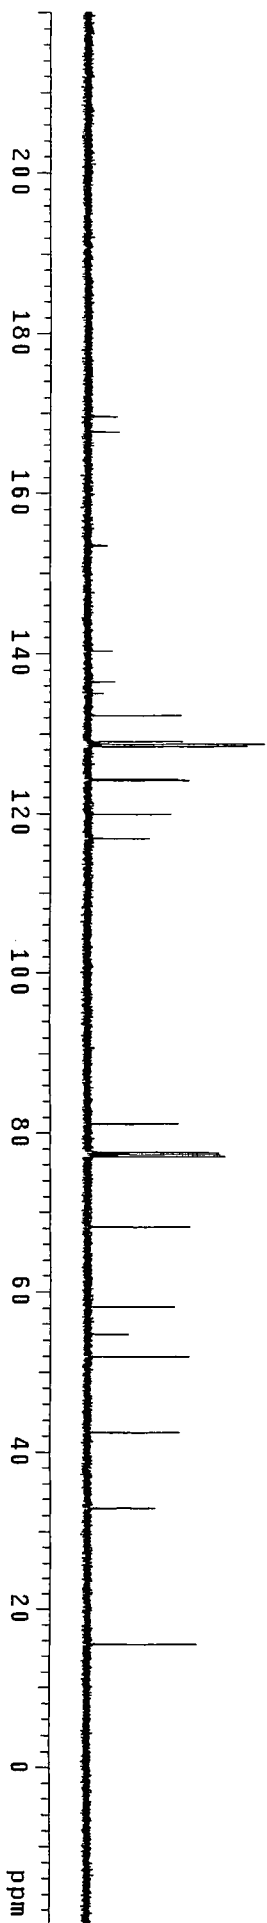



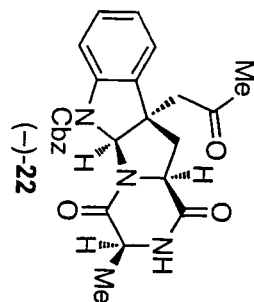

|             |          |            |         |
|-------------|----------|------------|---------|
| SAMPLE      |          | DEC. & VT  |         |
| solvent     | CDCl3    | dfrq       | 125.672 |
|             |          | dn         | C13     |
|             |          | dpwr       | 30      |
|             |          | dof        | 0       |
|             |          | din        | nmn     |
|             |          | dmm        | w       |
|             |          | dwm        | 10000   |
|             |          | dres       | 1.0     |
|             |          | homo       | n       |
| ACQUISITION |          | PROCESSING |         |
| sfrq        | 499.746  | wtfile     | ft      |
| tn          | H1       | proc       | 262144  |
| at          | 3.001    | math       | f       |
| np          | 63050    | verr       |         |
| sw          | 10504.2  | wexp       |         |
| fb          | not used | wbs        |         |
| bs          | 1        | wnt        |         |
| tpwr        | 56       |            |         |
| pl          | 8.6      |            |         |
| d1          | 2.000    |            |         |
| tof         | 1519.5   |            |         |
| nt          | 11111    |            |         |
| ct          | 7        |            |         |
| atlock      | n        |            |         |
| gain        | not used |            |         |
| flags       | not used |            |         |
| i1          | n        |            |         |
| in          | n        |            |         |
| dp          | y        |            |         |
| hs          | nm       |            |         |
| DISPLAY     |          |            |         |
| sp          | -249.9   |            |         |
| wp          | 6496.6   |            |         |
| vs          | 16       |            |         |
| sc          | 0        |            |         |
| wc          | 250      |            |         |
| hzm         | 25.99    |            |         |
| is          | 155.02   |            |         |
| rf1         | 4866.0   |            |         |
| rfp         | 3618.1   |            |         |
| th          | 7        |            |         |
| ins         | 100.000  |            |         |
| al          | cdc      |            |         |
|             | ph       |            |         |

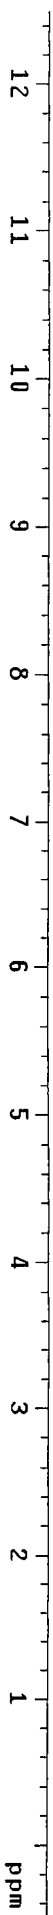



|             |          |            |          |
|-------------|----------|------------|----------|
| SAMPLE      |          | DEC. & VT  |          |
| solvent     | CDC13    | dfrq       | 125.672  |
|             |          | dn         | C13      |
|             |          | dpwr       | 30       |
|             |          | dof        | 0        |
|             |          | dm         | nmh      |
|             |          | dmm        | v        |
|             |          | dntf       | 10000    |
|             |          | dres       | 1.0      |
|             |          | homo       | n        |
| ACQUISITION |          | PROCESSING |          |
| sfrq        | 499.746  | ft         | 262144   |
| tn          | H1       | fn         | f        |
| at          | 3.001    | wf         | ft       |
| np          | 63050    | proc       | 262144   |
| sw          | 10504.2  | math       | f        |
| fb          | not used | wf         | ft       |
| bs          | not used | fn         | f        |
| tpwr        | 56       | werr       | 262144   |
| pw          | 8.6      | wexp       | f        |
| d1          | 2.000    | wbs        | f        |
| tof         | 1519.5   | wnt        | f        |
| nt          | 11111    | gain       | not used |
| ct          | 10       | flags      | not used |
| alock       | n        | i1         | n        |
| gain        | not used | in         | n        |
|             |          | dp         | y        |
|             |          | hs         | nm       |
| DISPLAY     |          |            |          |
| sp          | -249.9   |            |          |
| wd          | 6496.6   |            |          |
| vs          | 19       |            |          |
| sc          | 0        |            |          |
| wc          | 250      |            |          |
| h2mm        | 25.99    |            |          |
| is          | 178.78   |            |          |
| rfl         | 4865.1   |            |          |
| rflp        | 3618.1   |            |          |
| th          | 7        |            |          |
| ins         | 100.000  |            |          |
| ai          | cdc      |            |          |
|             | ph       |            |          |

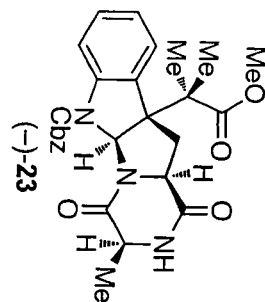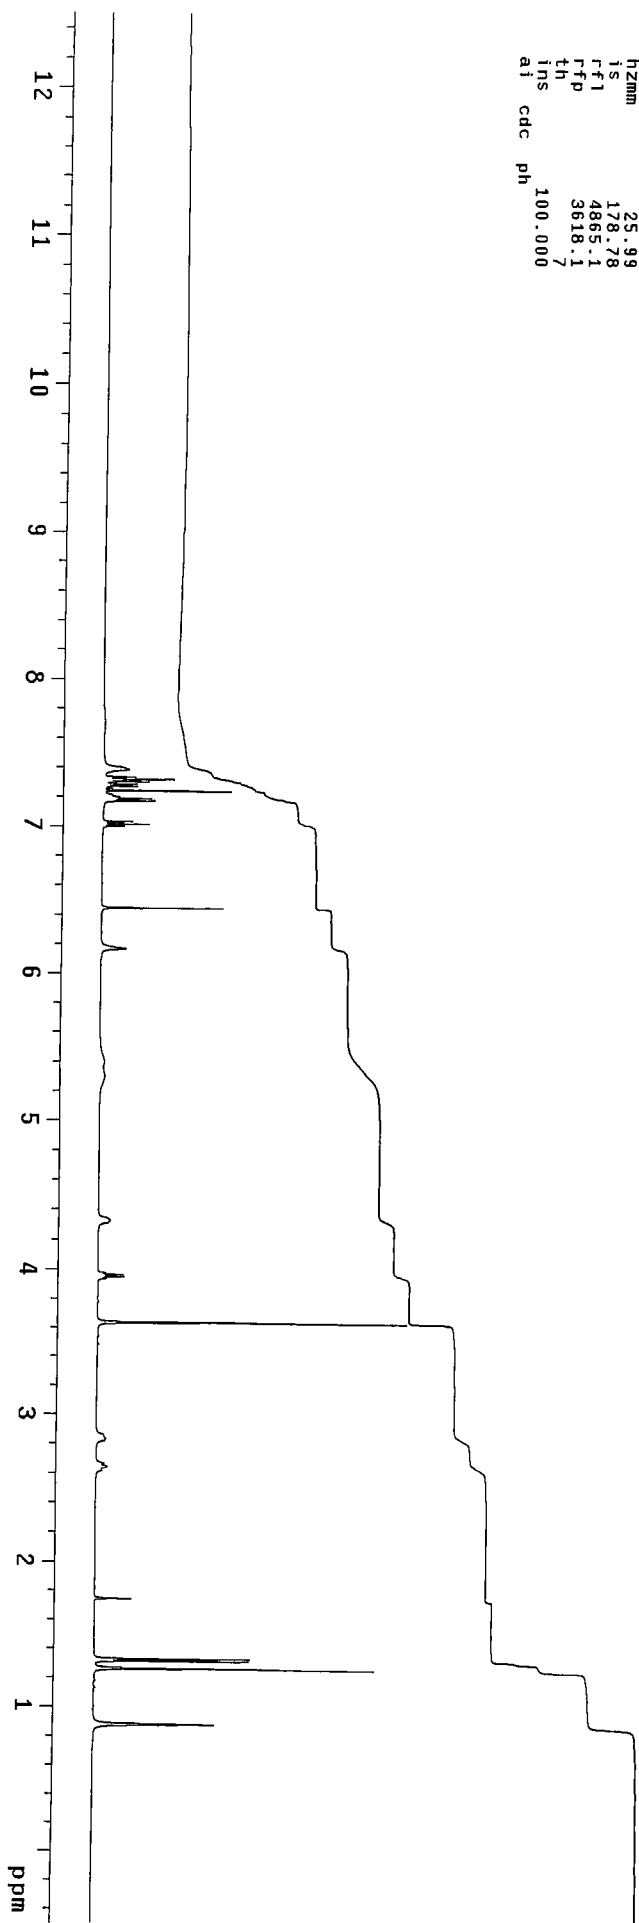

|             |          |           |         |
|-------------|----------|-----------|---------|
| SAMPLE      | CDC13    | DEC. & VT | 500.229 |
| SOLVENT     |          | dn        | H1      |
|             |          | dpwr      | 37      |
|             |          | dof       | -500.0  |
|             |          | dm        | Y       |
|             |          | dmm       | Y       |
|             |          | dmf       | 10000   |
| ACQUISITION | 125.795  | dseq      | 1.0     |
| tn          | C13      | dres      | n       |
| at          | 1.736    | homo      | n       |
| np          | 131010   | lb        | 2.00    |
| sw          | 37735.8  | wfifle    |         |
| fb          | not used | proc      |         |
| bs          | 1        | ft        | 131072  |
| ss          | 8        | fn        | f       |
| tpwr        | 53       | math      |         |
| pw          | 6.9      | werr      |         |
| dl          | 0.763    | wexp      |         |
| tof         | 631.4    | wps       |         |
| nt          | 11111    | wnt       |         |
| ct          | 2800     |           |         |
| atock       | n        |           |         |
| gain        | 60       |           |         |
| FLAGS       |          |           |         |
| il          | n        |           |         |
| in          | Y        |           |         |
| dp          | Y        |           |         |
| hs          | mh       |           |         |
| DISPLAY     |          |           |         |
| SP          | -6282.0  |           |         |
| WP          | 37735.3  |           |         |
| VS          | 1457     |           |         |
| WC          | 0        |           |         |
| SC          | 250      |           |         |
| hzm         | 150.94   |           |         |
| is          | 500.00   |           |         |
| rfl         | 16006.8  |           |         |
| rfp         | 9714.2   |           |         |
| th          | 1.000    |           |         |
| INS         |          |           |         |
| al          |          |           |         |

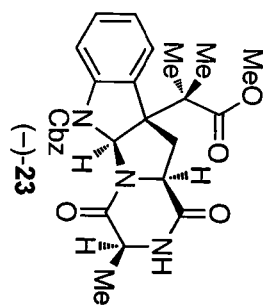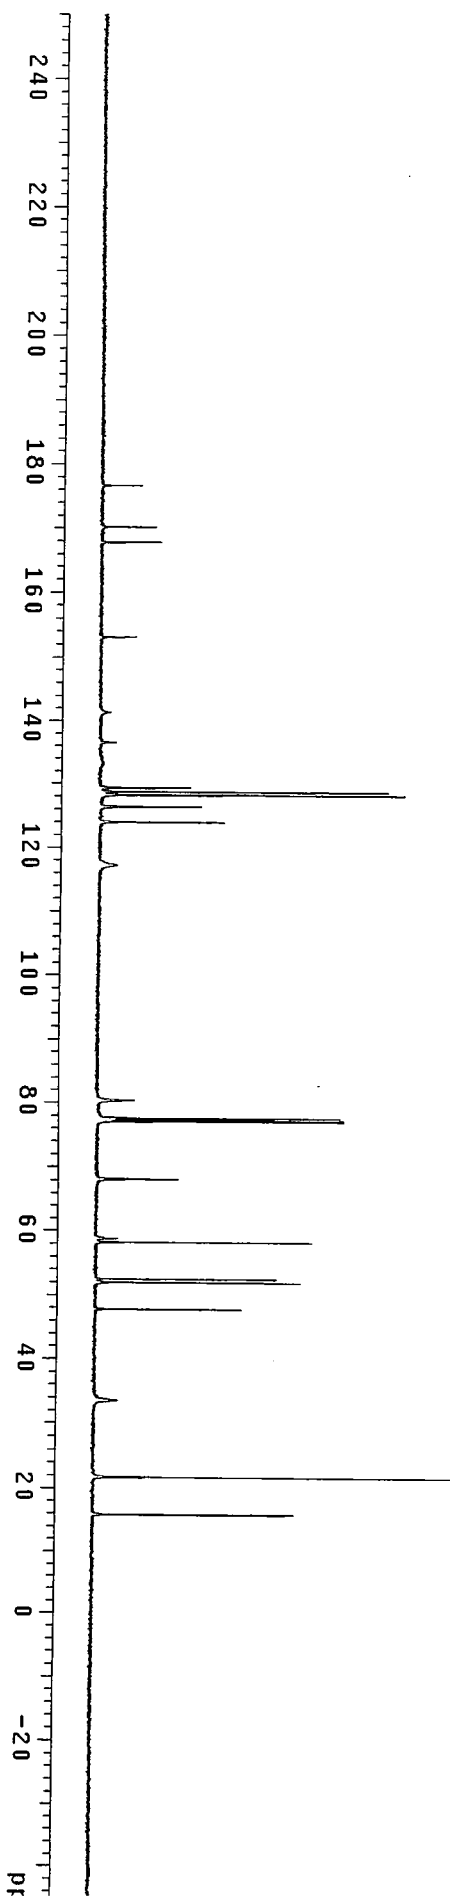



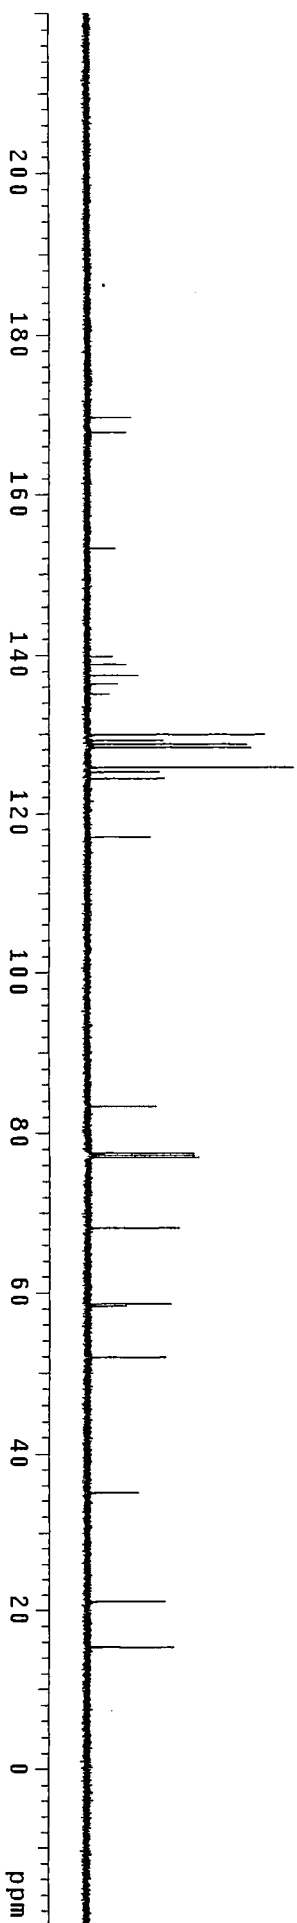

SAMPLE DEC. & VT 500.229  
 solvent CDC13  
 dfrq 500.229  
 dn H1  
 dpwr 37  
 dof -500.0  
 dm Y  
 dmm W  
 dmf 10000  
 dseq 1.0  
 dres n  
 dtes n  
 dwt n  
 dwt 131072

ACQUISITION  
 sfrq 125.795  
 tn C13  
 at 1.736  
 np 131010  
 sw 37735.8  
 fb not used  
 bs 8  
 ss 1  
 tpwr 53  
 pw 6.9  
 dl 0.763  
 tof 631.4  
 nt 11111  
 ct 192  
 atock n  
 gain 60

PROCESSING 0.30  
 ft  
 fn  
 math 131072

FLAGS  
 f1 n  
 in n  
 dp Y  
 hs nm

DISPLAY  
 sp -2515.9  
 wp 30187.6  
 vs 301  
 sc 0  
 wc 250  
 hzmm 120.75  
 is 500.00  
 rfi 16006.2  
 rfp 9714.2  
 tn 20  
 ins 1.000  
 at ph

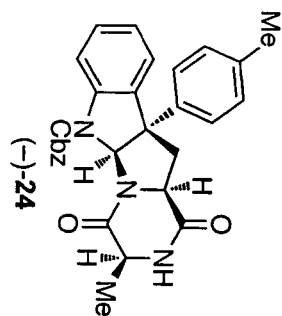

SAMPLE DEC. & VT  
 solvent CDCl3 dfrq 125.672  
 dn G13  
 dpwr 30  
 dof 0  
 dm nmh  
 dnm w  
 dmf 10000  
 dseq 1.0  
 dres homo  
 at H1  
 in 3.001  
 np 63050  
 sw 10504.2  
 fb not used  
 bs not used  
 tpwr 56  
 pw 8.6  
 dl 2.000  
 tof 1519.5  
 nt 1111  
 ct 6  
 atock n  
 gain not used  
 flags not used  
 i1 n  
 in Y  
 dp n  
 hs nmh  
 DISPLAY  
 SP -249.9  
 WP 6496.6  
 VS 17  
 SC 0  
 WC 250  
 hzmm 25.99  
 is 215.57  
 rfi 4865.7  
 rfp 3618.1  
 th 100.000  
 ins  
 al cdc ph

ACQUISITION  
 499.746  
 H1  
 63050  
 10504.2  
 not used  
 not used  
 56  
 8.6  
 2.000  
 1519.5  
 1111  
 6  
 n  
 not used  
 n  
 n  
 Y  
 nmh

PROCESSING  
 125.672  
 G13  
 30  
 0  
 nmh  
 w  
 10000  
 1.0  
 homo  
 H1  
 3.001  
 63050  
 10504.2  
 not used  
 not used  
 56  
 8.6  
 2.000  
 1519.5  
 1111  
 6  
 n  
 not used  
 n  
 Y  
 nmh

ft  
 262144  
 f  
 math  
 werr  
 wexp  
 wbs  
 wnt  
 wft

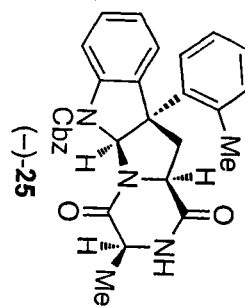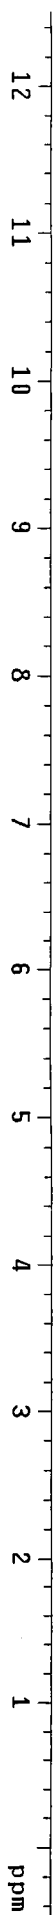

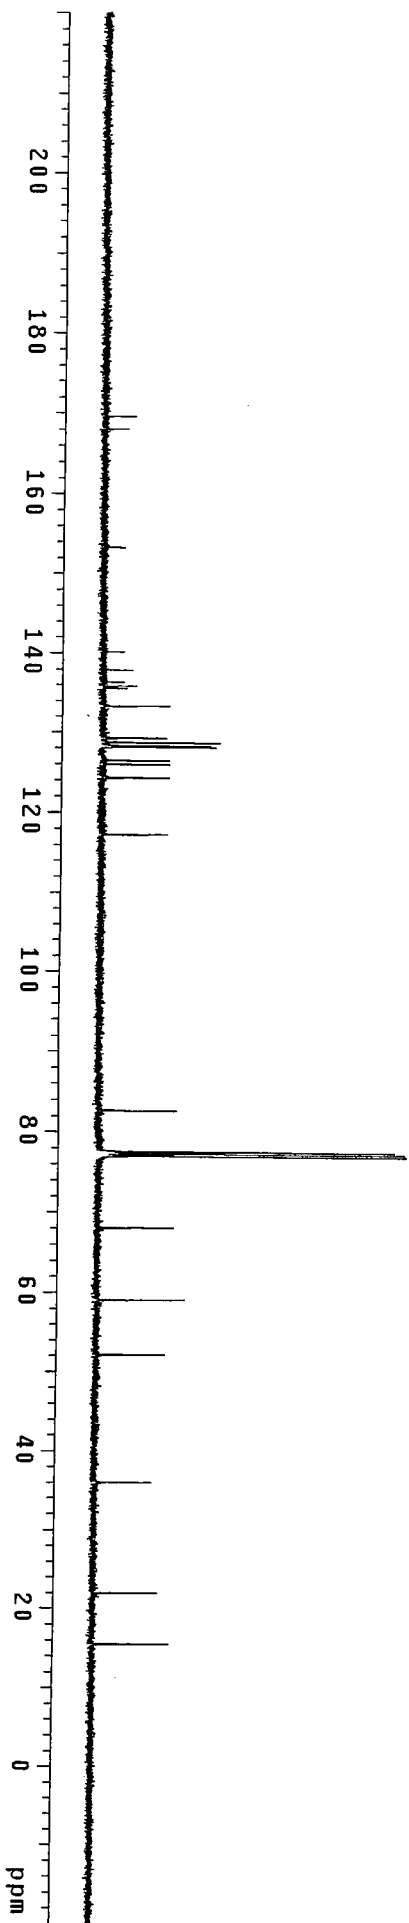

|             |          |            |         |
|-------------|----------|------------|---------|
| SAMPLE      |          | DEC. & VT  |         |
| solvent     | CDC13    | dfreq      | 500.229 |
|             |          | dn         | H1      |
|             |          | dpwr       | 37      |
|             |          | dof        | -500.0  |
|             |          | dm         | y       |
|             |          | dmm        | w       |
|             |          | dmf        | 10000   |
|             |          | dres       | n       |
|             |          | hom        | 1.0     |
| ACQUISITION |          | PROCESSING |         |
| sfrq        | 125.795  | l          | 1.00    |
| at          | C13      | ft         | 131072  |
| tn          | 1.736    | fn         | f       |
| np          | 131010   | l          | 1.00    |
| sw          | 37735.8  | l          | 1.00    |
| fb          | not used | wtfile     |         |
| bs          | 8        | proc       |         |
| ss          | 1        | math       |         |
| tpwr        | 53       | math       |         |
| pw          | 6.9      | math       |         |
| dl          | 0.763    | math       |         |
| lof         | 631.4    | math       |         |
| nt          | 11111    | math       |         |
| ct          | 1336     | math       |         |
| alock       | n        | math       |         |
| gain        | 60       | math       |         |
| FLAGS       |          |            |         |
| l1          | n        |            |         |
| l2          | n        |            |         |
| dp          | y        |            |         |
| hs          | nn       |            |         |
| DISPLAY     |          |            |         |
| sp          | -2515.9  |            |         |
| wp          | 30187.6  |            |         |
| vs          | 1506     |            |         |
| sc          | 0        |            |         |
| wc          | 250      |            |         |
| h2mm        | 120.75   |            |         |
| ls          | 500.00   |            |         |
| rfl         | 16002.7  |            |         |
| rflp        | 9714.2   |            |         |
| th          | 20       |            |         |
| ins         | 1.000    |            |         |
| at          | ph       |            |         |

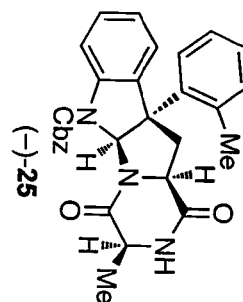



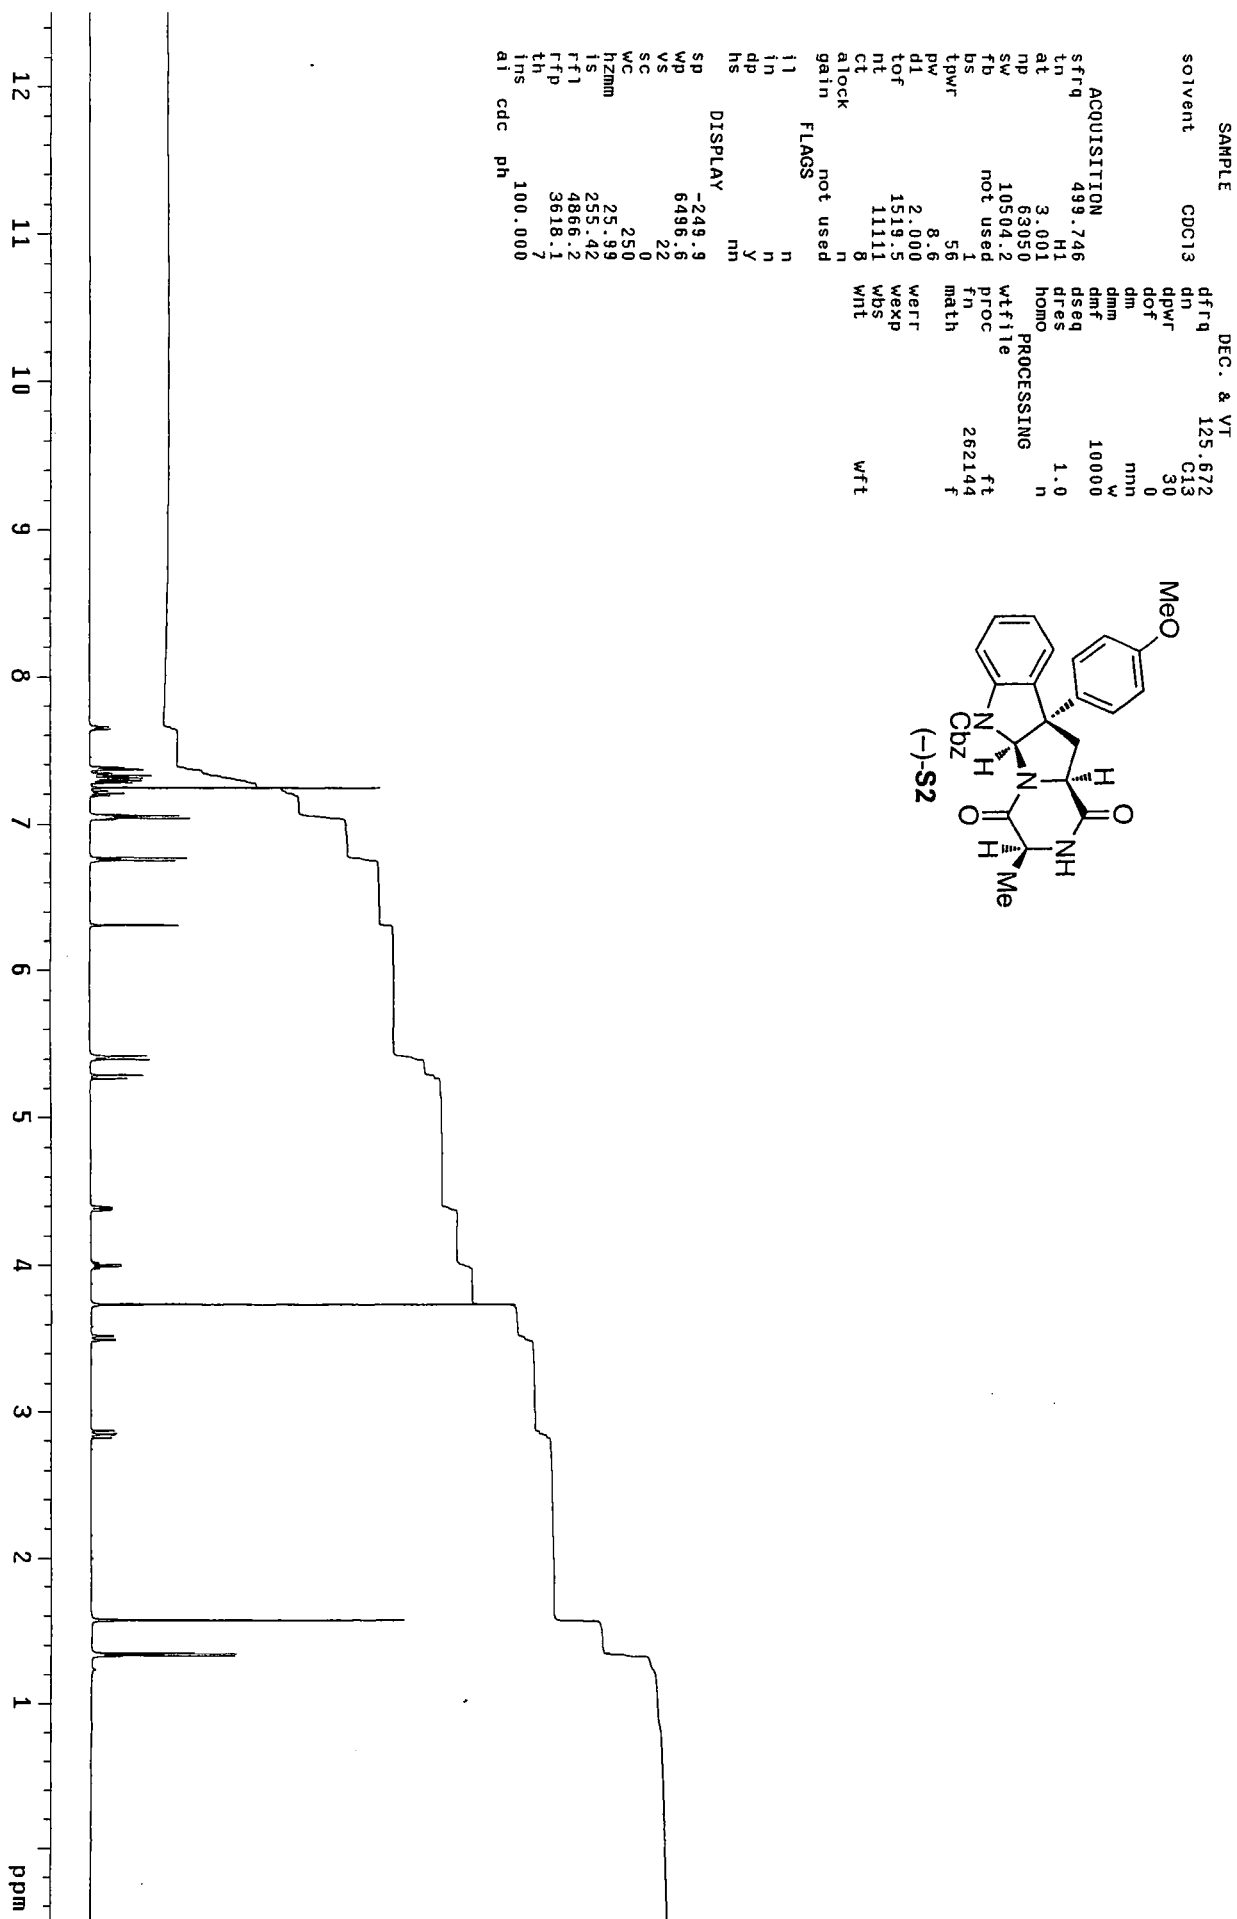

SAMPLE DEC. & VT  
 solvent CDC13 500.229  
 dh H1  
 dpwr 37  
 dof -500.0  
 dm Y  
 dmm Y  
 dmf 10000  
 dseq 1.0  
 dres n  
 at 1.736  
 np 131010  
 sw 37735.8  
 fb not used  
 bs 8  
 ss 1  
 tpwr 53  
 pw 6.9  
 dl 0.763  
 tof 631.4  
 nt 1111  
 ct 2048  
 atock n  
 gain 60

ACQUISITION  
 sfrq 125.795  
 th C13  
 at 1.736  
 np 131010  
 sw 37735.8  
 fb not used  
 bs 8  
 ss 1  
 tpwr 53  
 pw 6.9  
 dl 0.763  
 tof 631.4  
 nt 1111  
 ct 2048  
 atock n  
 gain 60

PROCESSING  
 lb 2.00  
 wfile  
 proc ft  
 fn 131072  
 math f

DISPLAY  
 sp -6286.8  
 wp 37735.3  
 vs 3948  
 sc 0  
 wc 250  
 hzmm 150.94  
 is 500.00  
 rfl 16001.6  
 rfp 9714.2  
 th 11  
 ins 1.000  
 al ph

FLAGS  
 i1 n  
 in n  
 dp Y  
 hs nn

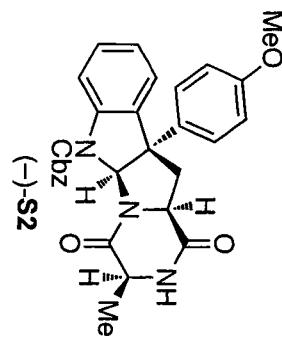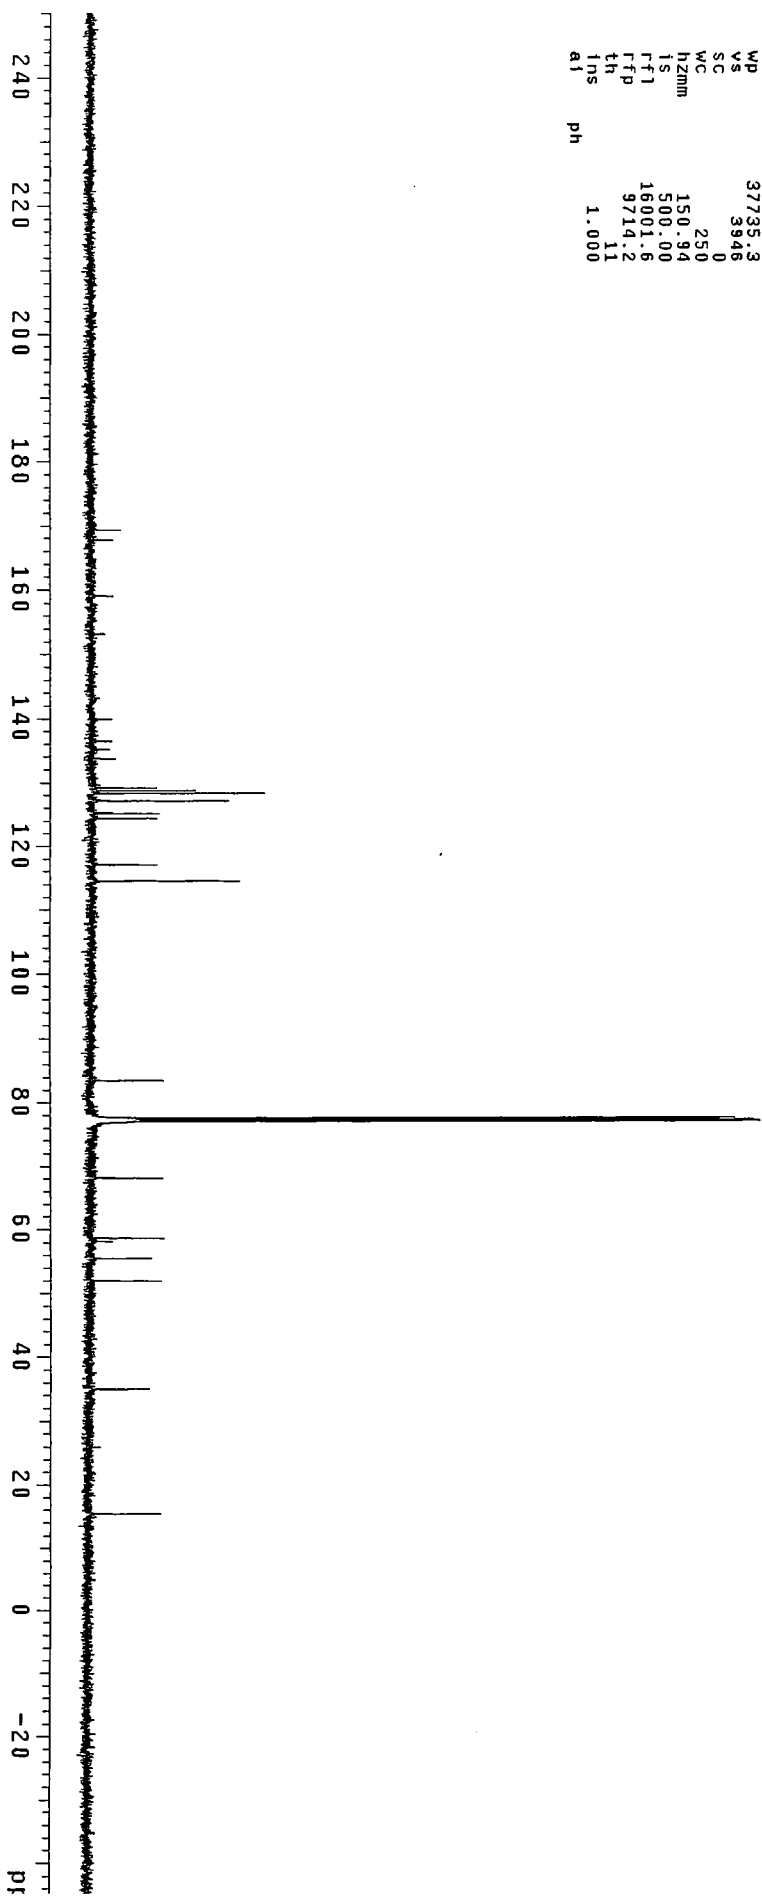

|         |          |           |         |
|---------|----------|-----------|---------|
| SAMPLE  |          | DEC. & VI |         |
| solvent | CDCl3    | dfreq     | 125.672 |
|         |          | dn        | C13     |
|         |          | dpwr      | 30      |
|         |          | dof       | 0       |
|         |          | dm        | nmn     |
|         |          | dmm       | v       |
|         |          | dmf       | 10000   |
|         |          | dseq      | 1.0     |
| acq     | 499.746  | dt        | 3.001   |
| tn      | H1       | dr        | nmn     |
| at      | 3.001    | homo      | 1.0     |
| np      | 63050    | proc      | n       |
| sw      | 10504.2  | wf1       | ft      |
| fb      | not used | fn        | 252144  |
| bs      | not used | math      | f       |
| tpwr    | 56       | werr      |         |
| pv      | 8.6      | wexp      |         |
| di      | 2.000    | wbs       |         |
| tof     | 1519.5   | wnt       |         |
| nt      | 11111    |           |         |
| ct      | 6        |           |         |
| alock   | n        |           |         |
| gain    | not used |           |         |
| fl      | n        |           |         |
| in      | n        |           |         |
| dp      | y        |           |         |
| hs      | nm       |           |         |
| DISPLAY |          |           |         |
| sp      | -249.9   |           |         |
| wp      | 6496.6   |           |         |
| vs      | 29       |           |         |
| sc      | 0        |           |         |
| wc      | 250      |           |         |
| h2mm    | 25.99    |           |         |
| ts      | 217.27   |           |         |
| rfl     | 4865.7   |           |         |
| rfd     | 3618.1   |           |         |
| th      | 7        |           |         |
| ins     | 100.000  |           |         |
| ai      | cdc      | ph        |         |

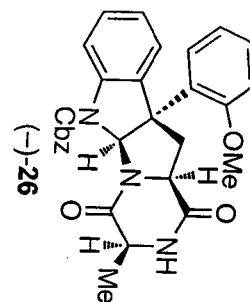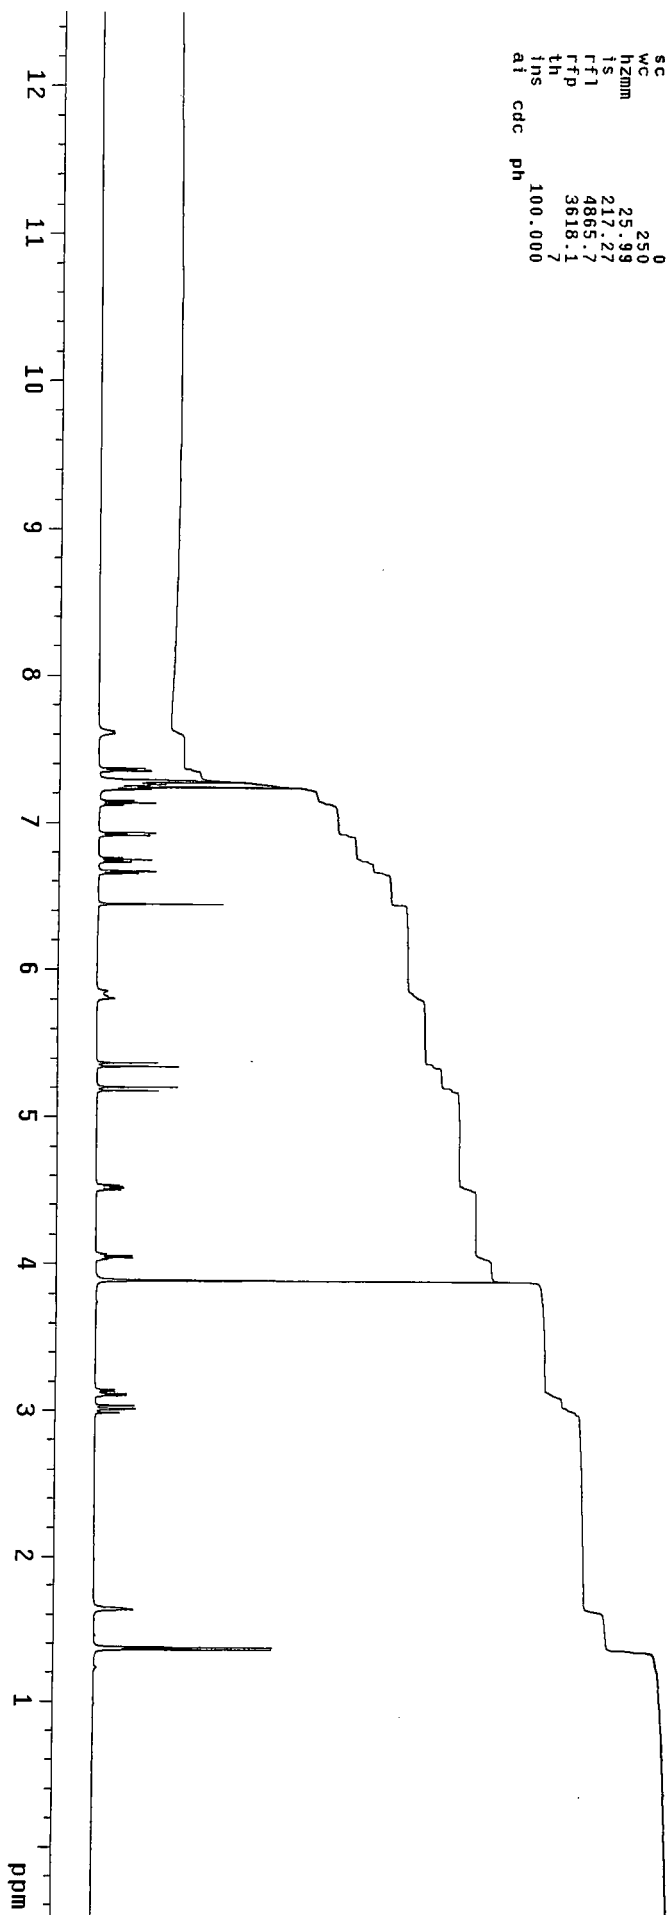

|         |       |           |
|---------|-------|-----------|
| SAMPLE  |       | DEC. & VT |
| solvent | CDCl3 | 500.229   |
|         |       | H1        |
|         |       | 37        |
|         |       | -500.0    |
|         |       | Y         |
|         |       | Y         |
|         |       | 10000     |
|         |       | Y         |
|         |       | Y         |
|         |       | 1.0       |
|         |       | n         |
|         |       | n         |
|         |       | 1.00      |
|         |       | ft        |
|         |       | 131072    |
|         |       | f         |

  

|             |            |      |
|-------------|------------|------|
| ACQUISITION |            |      |
| sfrq        | 125.795    |      |
| tn          | C13        |      |
| at          | 1.736      |      |
| np          | 131010     |      |
| sw          | 37235.8    |      |
| fb          | not used   |      |
| bs          | 8          |      |
| ss          | 1          |      |
| tpwr        | 53         |      |
| pw          | 6.9        |      |
| di          | 0.763      | weff |
| tof         | 631.4      | wexp |
| nt          | 1.1111e+06 | wbs  |
| ct          | 512        | wnt  |
| atlock      | n          |      |
| gain        | 60         |      |

  

|       |    |  |
|-------|----|--|
| FLAGS |    |  |
| ll    | n  |  |
| in    | n  |  |
| dp    | y  |  |
| hs    | nm |  |

  

|         |         |  |
|---------|---------|--|
| DISPLAY |         |  |
| sp      | -2515.9 |  |
| wp      | 30187.6 |  |
| vs      | 841     |  |
| sc      | 0       |  |
| wc      | 250     |  |
| h2mm    | 120.75  |  |
| is      | 500.00  |  |
| ffl     | 16003.9 |  |
| rfp     | 9714.2  |  |
| th      | 20      |  |
| ins     | 1.000   |  |
| al      |         |  |

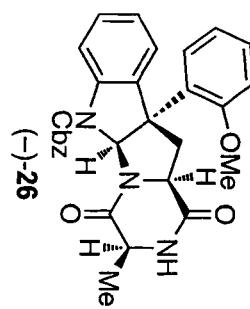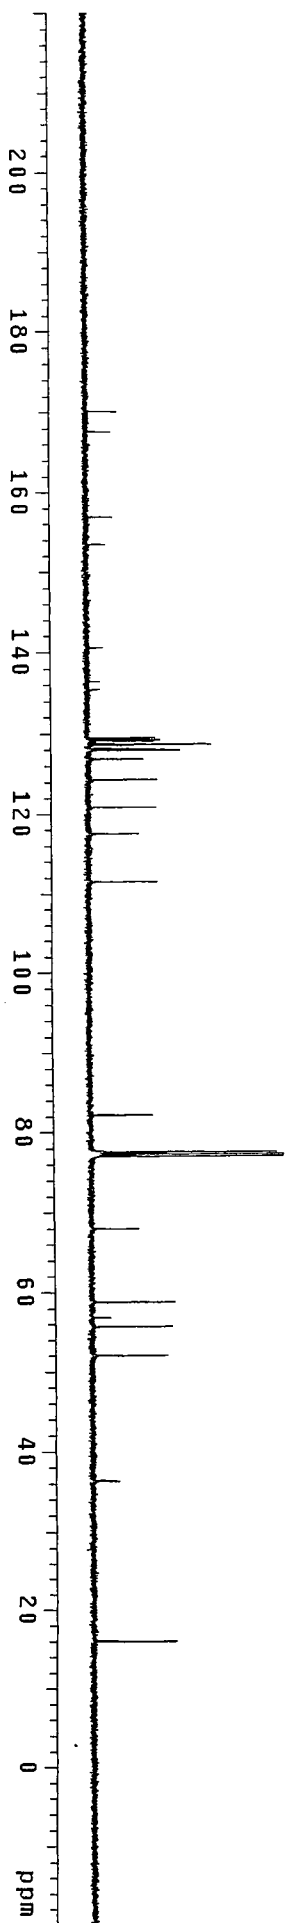

|             |          |            |         |
|-------------|----------|------------|---------|
| SAMPLE      |          | DEC. & VT  |         |
| solvent     | CDCl3    | dfrq       | 125.672 |
|             |          | dn         | 613     |
|             |          | dpwr       | 30      |
|             |          | dof        | 0       |
|             |          | dm         | nmh     |
|             |          | dmm        | w       |
|             |          | dmgf       | 10000   |
|             |          | dseq       | 1.0     |
|             |          | dmf        | n       |
|             |          | homo       | n       |
| ACQUISITION |          | PROCESSING |         |
| sfrq        | 499.746  | ft         | 262144  |
| tn          | 3.001    | fn         | f       |
| at          | 63050    | math       |         |
| np          | 10304.2  | proc       |         |
| sw          | not used | wtfile     |         |
| fb          | not used | math       |         |
| bs          | 56       | warr       |         |
| tpwr        | 8.6      | wexp       |         |
| pw          | 2.000    | wbs        |         |
| d1          | 1519.5   | whi        |         |
| tof         | 11111    |            |         |
| nt          | 7        |            |         |
| ct          | not used |            |         |
| gain        | not used |            |         |
| FLAGS       |          |            |         |
| il          | n        |            |         |
| in          | n        |            |         |
| dp          | y        |            |         |
| ds          | nmh      |            |         |
| hs          |          |            |         |
| DISPLAY     |          |            |         |
| sp          | -249.9   |            |         |
| wp          | 6496.6   |            |         |
| vs          | 28       |            |         |
| sc          | 0        |            |         |
| wc          | 250      |            |         |
| h2mm        | 25.99    |            |         |
| ts          | 166.67   |            |         |
| rfl         | 4865.9   |            |         |
| rfd         | 3518.1   |            |         |
| th          | 7        |            |         |
| ins         | 100.000  |            |         |
| ai          | cdc      | ph         |         |

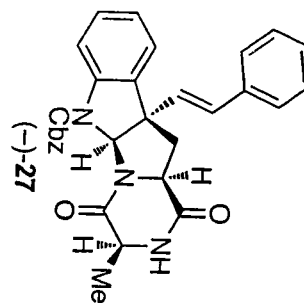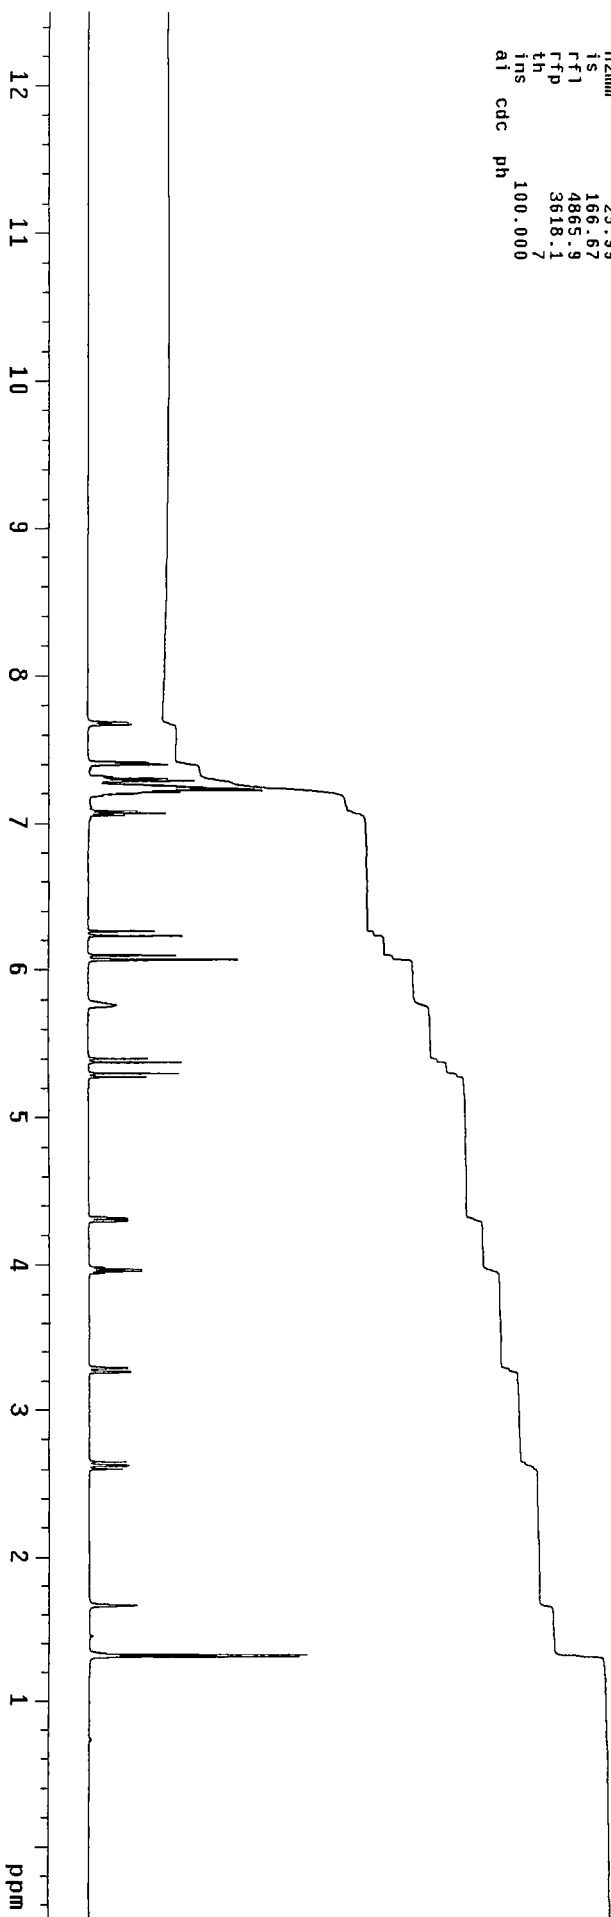

|             |          |           |         |
|-------------|----------|-----------|---------|
| SAMPLE      |          | DEC. & VT |         |
| Solvent     | CDC13    | dfreq     | 500.229 |
|             |          | dn        | H1      |
|             |          | dpwr      | 37      |
|             |          | dof       | -500.0  |
|             |          | dm        | Y       |
|             |          | dmm       | W       |
|             |          | dmf       | 10000   |
| ACQUISITION |          | dseq      | 1.0     |
| sfrq        | 125.795  | drss      | n       |
| tn          | C13      | homo      | n       |
| at          | 1.736    | proc      | 1.00    |
| np          | 131010   | wtfile    | 131072  |
| sw          | 37735.8  | lb        | f       |
| fb          | not used | math      | f       |
| bs          | 8        | werr      | 131072  |
| ss          | 1        | wexp      |         |
| tpwr        | 53       | wbs       |         |
| pw          | 6.9      | wit       |         |
| ul          | 0.763    |           |         |
| tof         | 631.4    |           |         |
| nt          | 11111    |           |         |
| ct          | 256      |           |         |
| alock       | n        |           |         |
| gain        | 60       |           |         |
| flags       |          |           |         |
| ll          | n        |           |         |
| ln          | n        |           |         |
| dp          | Y        |           |         |
| hs          | mn       |           |         |
| DISPLAY     |          |           |         |
| SP          | -2515.9  |           |         |
| WP          | 30187.6  |           |         |
| VS          | 625      |           |         |
| SC          | 0        |           |         |
| WC          | 250      |           |         |
| hzm         | 120.75   |           |         |
| IS          | 500.00   |           |         |
| rfl         | 16005.6  |           |         |
| rflp        | 9714.2   |           |         |
| th          | 20       |           |         |
| ins         | 1.000    |           |         |
| al          | ph       |           |         |

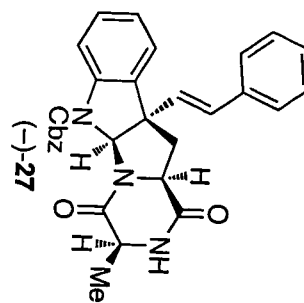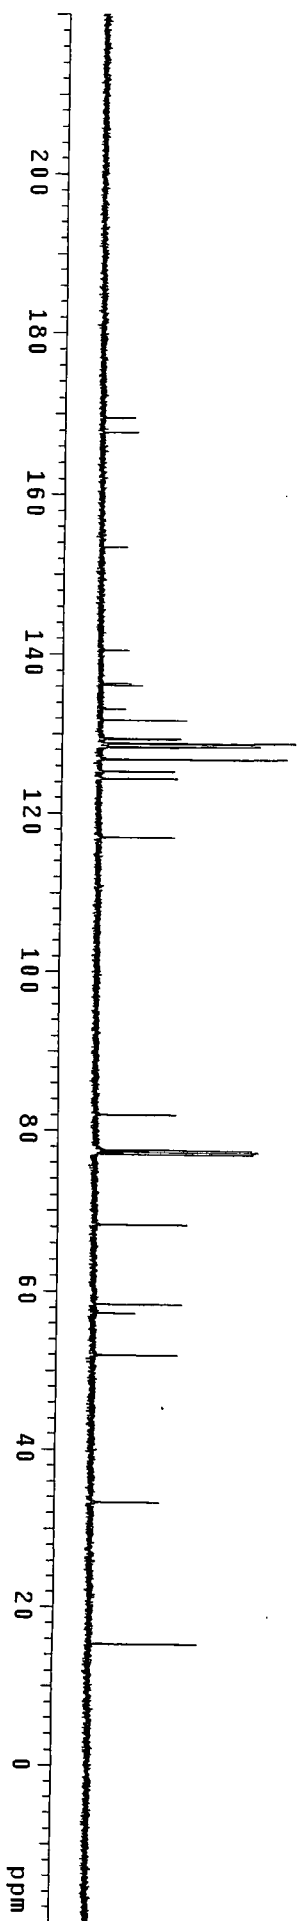

Supplement: NIHMS323492-supplement-1_si_001.pdf [file NIHMS323492-supplement-1_si_001.pdf]
